# Supplementary material for: Pharmacogenomics of intravenous immunoglobulin response in Kawasaki disease
Source: Front Immunol. 2024 Jan 8;14:1287094. doi: 10.3389/fimmu.2023.1287094 (PMC10800400; doi:10.3389/fimmu.2023.1287094)
Supplement: Supplementary Table 3 — Minor Allele Frequency, SNP Characteristics in the Study Population and Reference 1000 Genome Populations and association with IVIG response in additive genetic model (beta and p-values). [file Table_3.xlsx]

## Sheet: IVIG_hits_allhits_merged_with_a
Supplement Table 3 Minor Allele Frequency, SNP Characteristics in the Study Population and Reference 1000 Genome Populations and association with IVIG response in additive genetic model (beta and p-values)
W - White, AA - African American, As - Asian, Hisp - Hispanic
			WGS Summary Statistics										ANNOVAR													KD Allele Frequency
SNP	Chr	Pos_HG38	beta values_NonResp_Comb	beta values_NonResp_W	beta values_NonResp_AA	beta values_NonResp_As	beta values_NonResp_Hisp	P-values_NonResP-values_Comb	P-values_NonResP-values_W	P-values_NonResP-values_AA	P-values_NonResP-values_As	P-values_NonResP-values_Hisp	Ref	Alt	Function	Gene	GeneDetail.refGeneWithVer	avsnp150	Chr	Pos	P-values_NonResP_Comb	P-values_NonResP_W	P-values_NonResP_AA	P-values_NonResP_As	P-values_NonResP_Hisp	A1	A2	All (freq)	All (N)	All Cases (freq)	All Cases (N)	All Controls (freq)	All Controls (N)	All Cau (freq)	All Cau (N)	Cau Cases (freq)	Cau Cases(N)	Cau Controls (freq)	Cau Controls (N)	All As (freq)	All As (N)	As Cases (freq)	As Cases (N)	As Controls (freq)	As Controls (N)	All AA (freq)	All AA (N)	AA Cases(freq)	AA Cases(N)
rs137965237	1	890758	-0.8863	-1.258	-1.655	-0.2205	-0.3883	0.0001591	6.19e-05	0.09361	0.7364	0.5487	A	G	intergenic	FAM41C;LINC02593	dist=13956;dist=26060	.	1	890758	0.0001591	6.19e-05	0.09361	0.7364	0.5487	A	G	0.3842	924	0.3354	328	0.4111	596	0.373	488	0.305	200	0.4201	288	0.4144	222	0.4259	54	0.4107	168	0.3378	74	0.25	20
rs12691486	1	31407307	0.7367	1.342	0.6266	-0.4387	-0.903	0.003263	7.14e-05	0.4176	0.7215	0.1865	G	C	intergenic	FABP3;SERINC2	dist=34019;dist=2470	.	1	31407307	0.003263	7.14e-05	0.4176	0.7215	0.1865	G	C	0.1008	942	0.1377	334	0.08059	608	0.108	500	0.1748	206	0.06122	294	0.02252	222	0.01852	54	0.02381	168	0.2632	76	0.3	20
rs12567192	1	33805393	0.6556	1.347	0.7579	0.4214	-0.1809	0.0005539	1.1e-05	0.3904	0.2905	0.6853	C	T	intronic	CSMD2	.	.	1	33805393	0.0005539	1.1e-05	0.3904	0.2905	0.6853	C	T	0.1578	944	0.2066	334	0.1311	610	0.1335	502	0.2087	206	0.08108	296	0.1982	222	0.2407	54	0.1845	168	0.09211	76	0.15	20
rs1325244	1	33805912	0.6516	1.34	0.7579	0.4214	-0.1809	0.0005984	1.24e-05	0.3904	0.2905	0.6853	C	A	intronic	CSMD2	.	.	1	33805912	0.0005984	1.24e-05	0.3904	0.2905	0.6853	C	A	0.1582	942	0.2066	334	0.1316	608	0.134	500	0.2087	206	0.08163	294	0.1982	222	0.2407	54	0.1845	168	0.09211	76	0.15	20
rs1886636	1	33806947	0.6536	1.368	0.7579	0.3849	-0.1964	0.0007018	1.11e-05	0.3904	0.3553	0.6599	G	A	intronic	CSMD2	.	.	1	33806947	0.0007018	1.11e-05	0.3904	0.3553	0.6599	G	A	0.1562	928	0.2036	334	0.1296	594	0.1341	492	0.2087	206	0.08042	286	0.1881	218	0.2222	54	0.1768	164	0.09211	76	0.15	20
rs10798993	1	33811279	0.6631	1.35	0.9909	0.4541	-0.1809	0.0006345	2.02e-05	0.2859	0.2551	0.6853	G	A	intronic	CSMD2	.	.	1	33811279	0.0006345	2.02e-05	0.2859	0.2551	0.6853	G	A	0.1532	940	0.2006	334	0.1271	606	0.1285	498	0.199	206	0.07877	292	0.1937	222	0.2407	54	0.1786	168	0.07895	76	0.15	20
rs10798994	1	33811573	0.6516	1.34	0.7579	0.4214	-0.1809	0.0005984	1.24e-05	0.3904	0.2905	0.6853	C	T	intronic	CSMD2	.	.	1	33811573	0.0005984	1.24e-05	0.3904	0.2905	0.6853	C	T	0.1582	942	0.2066	334	0.1316	608	0.134	500	0.2087	206	0.08163	294	0.1982	222	0.2407	54	0.1845	168	0.09211	76	0.15	20
rs12567228	1	33811931	0.6556	1.347	0.7579	0.4214	-0.1809	0.0005539	1.1e-05	0.3904	0.2905	0.6853	G	A	intronic	CSMD2	.	.	1	33811931	0.0005539	1.1e-05	0.3904	0.2905	0.6853	G	A	0.1578	944	0.2066	334	0.1311	610	0.1335	502	0.2087	206	0.08108	296	0.1982	222	0.2407	54	0.1845	168	0.09211	76	0.15	20
rs12567612	1	33812103	0.6516	1.34	0.7579	0.4214	-0.1809	0.0005984	1.24e-05	0.3904	0.2905	0.6853	C	T	intronic	CSMD2	.	.	1	33812103	0.0005984	1.24e-05	0.3904	0.2905	0.6853	C	T	0.1582	942	0.2066	334	0.1316	608	0.134	500	0.2087	206	0.08163	294	0.1982	222	0.2407	54	0.1845	168	0.09211	76	0.15	20
rs11587451	1	33812378	0.6424	1.34	0.3953	0.4214	-0.1282	0.0006722	1.24e-05	0.6235	0.2905	0.77	G	A	intronic	CSMD2	.	.	1	33812378	0.0006722	1.24e-05	0.6235	0.2905	0.77	G	A	0.1624	942	0.2096	334	0.1365	608	0.134	500	0.2087	206	0.08163	294	0.1982	222	0.2407	54	0.1845	168	0.1184	76	0.15	20
rs12043217	1	33812583	0.6556	1.347	0.7579	0.4214	-0.1809	0.0005539	1.1e-05	0.3904	0.2905	0.6853	C	T	intronic	CSMD2	.	.	1	33812583	0.0005539	1.1e-05	0.3904	0.2905	0.6853	C	T	0.1578	944	0.2066	334	0.1311	610	0.1335	502	0.2087	206	0.08108	296	0.1982	222	0.2407	54	0.1845	168	0.09211	76	0.15	20
rs12045793	1	33812647	0.6556	1.347	0.7579	0.4214	-0.1809	0.0005539	1.1e-05	0.3904	0.2905	0.6853	A	G	intronic	CSMD2	.	.	1	33812647	0.0005539	1.1e-05	0.3904	0.2905	0.6853	A	G	0.1578	944	0.2066	334	0.1311	610	0.1335	502	0.2087	206	0.08108	296	0.1982	222	0.2407	54	0.1845	168	0.09211	76	0.15	20
rs12024872	1	33812700	0.6647	1.347	0.7579	0.4541	-0.1809	0.0004745	1.1e-05	0.3904	0.2551	0.6853	A	C	intronic	CSMD2	.	.	1	33812700	0.0004745	1.1e-05	0.3904	0.2551	0.6853	A	C	0.1568	944	0.2066	334	0.1295	610	0.1335	502	0.2087	206	0.08108	296	0.1937	222	0.2407	54	0.1786	168	0.09211	76	0.15	20
rs71683767	1	33812908	0.6606	1.34	0.7579	0.4541	-0.1809	0.0005138	1.24e-05	0.3904	0.2551	0.6853	G	GT	intronic	CSMD2	.	.	1	33812908	0.0005138	1.24e-05	0.3904	0.2551	0.6853	GT	G	0.1571	942	0.2066	334	0.1299	608	0.134	500	0.2087	206	0.08163	294	0.1937	222	0.2407	54	0.1786	168	0.09211	76	0.15	20
rs4653351	1	33813338	0.6516	1.34	0.7579	0.4214	-0.1809	0.0005984	1.24e-05	0.3904	0.2905	0.6853	G	A	intronic	CSMD2	.	.	1	33813338	0.0005984	1.24e-05	0.3904	0.2905	0.6853	G	A	0.1582	942	0.2066	334	0.1316	608	0.134	500	0.2087	206	0.08163	294	0.1982	222	0.2407	54	0.1845	168	0.09211	76	0.15	20
rs34712452	1	33813544	0.6341	1.281	0.7579	0.4214	-0.1809	0.000794	2.11e-05	0.3904	0.2905	0.6853	C	T	intronic	CSMD2	.	.	1	33813544	0.000794	2.11e-05	0.3904	0.2905	0.6853	C	T	0.1592	942	0.2066	334	0.1332	608	0.136	500	0.2087	206	0.08503	294	0.1982	222	0.2407	54	0.1845	168	0.09211	76	0.15	20
rs34581894	1	33813553	0.6516	1.34	0.7579	0.4214	-0.1809	0.0005984	1.24e-05	0.3904	0.2905	0.6853	C	G	intronic	CSMD2	.	.	1	33813553	0.0005984	1.24e-05	0.3904	0.2905	0.6853	C	G	0.1582	942	0.2066	334	0.1316	608	0.134	500	0.2087	206	0.08163	294	0.1982	222	0.2407	54	0.1845	168	0.09211	76	0.15	20
rs76515533	1	33813559	0.6516	1.34	0.7579	0.4214	-0.1809	0.0005984	1.24e-05	0.3904	0.2905	0.6853	T	C	intronic	CSMD2	.	.	1	33813559	0.0005984	1.24e-05	0.3904	0.2905	0.6853	T	C	0.1582	942	0.2066	334	0.1316	608	0.134	500	0.2087	206	0.08163	294	0.1982	222	0.2407	54	0.1845	168	0.09211	76	0.15	20
rs16835937	1	33813925	0.6571	1.384	0.7579	0.3812	-0.1809	0.0005803	8.41e-06	0.3904	0.3469	0.6853	C	T	intronic	CSMD2	.	.	1	33813925	0.0005803	8.41e-06	0.3904	0.3469	0.6853	C	T	0.1567	938	0.2048	332	0.1304	606	0.1325	498	0.2087	206	0.07877	292	0.1955	220	0.2308	52	0.1845	168	0.09211	76	0.15	20
rs12045177	1	33814248	0.6516	1.34	0.7579	0.4214	-0.1809	0.0005984	1.24e-05	0.3904	0.2905	0.6853	C	T	intronic	CSMD2	.	.	1	33814248	0.0005984	1.24e-05	0.3904	0.2905	0.6853	C	T	0.1582	942	0.2066	334	0.1316	608	0.134	500	0.2087	206	0.08163	294	0.1982	222	0.2407	54	0.1845	168	0.09211	76	0.15	20
rs12044396	1	33814387	0.6516	1.34	0.7579	0.4214	-0.1809	0.0005984	1.24e-05	0.3904	0.2905	0.6853	T	A	intronic	CSMD2	.	.	1	33814387	0.0005984	1.24e-05	0.3904	0.2905	0.6853	T	A	0.1582	942	0.2066	334	0.1316	608	0.134	500	0.2087	206	0.08163	294	0.1982	222	0.2407	54	0.1845	168	0.09211	76	0.15	20
rs12047779	1	33814742	0.6836	1.303	0.9909	0.5769	-0.1809	0.0003802	3.02e-05	0.2859	0.1354	0.6853	A	G	intronic	CSMD2	.	.	1	33814742	0.0003802	3.02e-05	0.2859	0.1354	0.6853	A	G	0.1582	942	0.2066	334	0.1316	608	0.13	500	0.199	206	0.08163	294	0.2117	222	0.2778	54	0.1905	168	0.07895	76	0.15	20
rs12047802	1	33814824	0.6218	1.26	0.7579	0.4453	-0.1809	0.001049	4.05e-05	0.3904	0.2532	0.6853	T	G	intronic	CSMD2	.	.	1	33814824	0.001049	4.05e-05	0.3904	0.2532	0.6853	T	G	0.1596	940	0.2036	334	0.1353	606	0.1305	498	0.199	206	0.08219	292	0.2117	222	0.2593	54	0.1964	168	0.09211	76	0.15	20
rs12567943	1	33816548	0.6318	1.311	0.9909	0.4222	-0.1809	0.0008757	2.72e-05	0.2859	0.259	0.6853	A	G	intronic	CSMD2	.	.	1	33816548	0.0008757	2.72e-05	0.2859	0.259	0.6853	A	G	0.1631	944	0.2066	334	0.1393	610	0.1295	502	0.199	206	0.08108	296	0.2342	222	0.2778	54	0.2202	168	0.07895	76	0.15	20
rs4653352	1	33817423	0.6392	1.361	0.6913	0.4222	-0.1809	0.0007303	1.43e-05	0.4394	0.259	0.6853	G	A	intronic	CSMD2	.	.	1	33817423	0.0007303	1.43e-05	0.4394	0.259	0.6853	G	A	0.1653	944	0.2096	334	0.141	610	0.1315	502	0.2039	206	0.08108	296	0.2342	222	0.2778	54	0.2202	168	0.09211	76	0.15	20
rs10753292	1	33837199	0.6609	0.9519	1.374	0.6612	0.008797	4.79e-05	6.67e-05	0.104	0.05939	0.9827	C	A	intronic	CSMD2	.	.	1	33837199	4.79e-05	6.67e-05	0.104	0.05939	0.9827	C	A	0.2797	944	0.3413	334	0.2459	610	0.2331	502	0.3204	206	0.1723	296	0.3063	222	0.3889	54	0.2798	168	0.4737	76	0.4	20
rs2358517	1	33837400	0.652	0.9032	1.329	0.7794	-0.08883	8.56e-05	0.0002043	0.1008	0.02964	0.8351	T	C	intronic	CSMD2	.	.	1	33837400	8.56e-05	0.0002043	0.1008	0.02964	0.8351	T	C	0.2633	942	0.3234	334	0.2303	608	0.222	500	0.301	206	0.1667	294	0.2928	222	0.3889	54	0.2619	168	0.4079	76	0.45	20
C1_M3904	1	33837401	0.652	0.9032	1.329	0.7794	-0.08883	8.56e-05	0.0002043	0.1008	0.02964	0.8351	A	AT	intronic	CSMD2	.	rs5773433	1	33837401	8.56e-05	0.0002043	0.1008	0.02964	0.8351	AT	A	0.2633	942	0.3234	334	0.2303	608	0.222	500	0.301	206	0.1667	294	0.2928	222	0.3889	54	0.2619	168	0.4079	76	0.45	20
rs1321623	1	33841104	0.6648	0.9193	1.397	0.7923	-0.08883	6.71e-05	0.0002015	0.08273	0.02612	0.8351	G	A	intronic	CSMD2	.	.	1	33841104	6.71e-05	0.0002015	0.08273	0.02612	0.8351	G	A	0.2564	944	0.3174	334	0.223	610	0.2131	502	0.2913	206	0.1588	296	0.2883	222	0.3889	54	0.256	168	0.3947	76	0.45	20
rs987955	1	33842129	0.6699	0.9732	1.335	0.6751	0.008797	3.84e-05	7.14e-05	0.06415	0.05275	0.9827	T	G	intronic	CSMD2	.	.	1	33842129	3.84e-05	7.14e-05	0.06415	0.05275	0.9827	T	G	0.2638	944	0.3293	334	0.2279	610	0.2211	502	0.3058	206	0.1622	296	0.3018	222	0.3889	54	0.2738	168	0.3816	76	0.45	20
rs6425850	1	33842984	0.5644	1.026	0.0175	0.6637	-0.14	0.0008873	9.89e-05	0.9815	0.0575	0.7234	G	T	intronic	CSMD2	.	.	1	33842984	0.0008873	9.89e-05	0.9815	0.0575	0.7234	G	T	0.2399	942	0.2904	334	0.2122	608	0.2	500	0.2767	206	0.1463	294	0.2838	222	0.3704	54	0.256	168	0.2763	76	0.3	20
rs10798999	1	33843316	0.6508	0.9205	1.522	0.7487	-0.1557	8.44e-05	0.0001517	0.06067	0.0369	0.7173	C	T	intronic	CSMD2	.	.	1	33843316	8.44e-05	0.0001517	0.06067	0.0369	0.7173	C	T	0.2659	944	0.3293	334	0.2311	610	0.2271	502	0.3107	206	0.1689	296	0.2973	222	0.3889	54	0.2679	168	0.3816	76	0.45	20
rs988425	1	33845534	0.7512	0.9511	1.659	0.9211	0.142	5.9e-06	0.0001118	0.0379	0.009025	0.7295	A	T	intronic	CSMD2	.	.	1	33845534	5.9e-06	0.0001118	0.0379	0.009025	0.7295	A	T	0.2665	942	0.3413	334	0.2253	608	0.23	500	0.3107	206	0.1735	294	0.2973	222	0.4259	54	0.256	168	0.3553	76	0.45	20
rs1884983	1	33862701	0.6426	0.8097	-1.109	0.669	0.2551	9.29e-05	0.0004703	0.1482	0.07703	0.5444	T	C	intronic	CSMD2;HMGB4	.	.	1	33862701	9.29e-05	0.0004703	0.1482	0.07703	0.5444	T	C	0.2728	942	0.3383	334	0.2368	608	0.242	500	0.3204	206	0.1871	294	0.2613	222	0.3519	54	0.2321	168	0.4474	76	0.45	20
rs6425854	1	33876798	0.9945	1.288	0.3883	0.4016	1.155	2.81e-05	0.0003525	0.6249	0.4661	0.05519	G	T	ncRNA_intronic	CSMD2-AS1	.	.	1	33876798	2.81e-05	0.0003525	0.6249	0.4661	0.05519	G	T	0.1072	942	0.1587	334	0.07895	608	0.082	500	0.1408	206	0.04082	294	0.08108	222	0.1296	54	0.06548	168	0.2895	76	0.3	20
rs6692851	1	33880961	0.9806	1.288	0.3883	0.3191	1.155	3.42e-05	0.0003525	0.6249	0.5625	0.05519	C	T	ncRNA_intronic	CSMD2-AS1	.	.	1	33880961	3.42e-05	0.0003525	0.6249	0.5625	0.05519	C	T	0.1051	942	0.1557	334	0.0773	608	0.082	500	0.1408	206	0.04082	294	0.08559	222	0.1296	54	0.07143	168	0.2632	76	0.3	20
rs6694382	1	33882659	0.9687	1.289	0.2582	0.3191	1.155	4.19e-05	0.0003508	0.745	0.5625	0.05519	G	A	ncRNA_intronic	CSMD2-AS1	.	.	1	33882659	4.19e-05	0.0003508	0.745	0.5625	0.05519	G	A	0.1059	944	0.1557	334	0.07869	610	0.08167	502	0.1408	206	0.04054	296	0.08559	222	0.1296	54	0.07143	168	0.2763	76	0.3	20
rs1321630	1	33883270	0.9248	1.233	0.1242	0.3191	1.155	5.47e-05	0.0003073	0.8617	0.5625	0.05519	C	T	ncRNA_intronic	CSMD2-AS1	.	.	1	33883270	5.47e-05	0.0003073	0.8617	0.5625	0.05519	C	T	0.1115	942	0.1617	334	0.08388	608	0.09	500	0.1505	206	0.04762	294	0.08559	222	0.1296	54	0.07143	168	0.2895	76	0.3	20
rs1321631	1	33883311	0.9384	1.233	0.2309	0.3191	1.155	4.25e-05	0.0003073	0.7443	0.5625	0.05519	G	A	ncRNA_intronic	CSMD2-AS1	.	.	1	33883311	4.25e-05	0.0003073	0.7443	0.5625	0.05519	G	A	0.1104	942	0.1617	334	0.08224	608	0.09	500	0.1505	206	0.04762	294	0.08559	222	0.1296	54	0.07143	168	0.2763	76	0.3	20
rs61360744	1	33884380	0.9917	1.214	0.1242	0.6833	1.155	9.88e-06	0.0001825	0.8617	0.1869	0.05519	G	GCC	ncRNA_intronic	CSMD2-AS1	.	rs61360744	1	33884380	9.88e-06	0.0001825	0.8617	0.1869	0.05519	GCC	G	0.1189	942	0.1766	334	0.08717	608	0.1	500	0.165	206	0.05442	294	0.09459	222	0.1667	54	0.07143	168	0.2895	76	0.3	20
rs12035681	1	38967699	0.7471	1.474	0.4304	-0.5942	0.2546	0.0002529	8.15e-05	0.5919	0.142	0.5478	T	C	intergenic	RHBDL2;AKIRIN1	dist=25869;dist=23545	.	1	38967699	0.0002529	8.15e-05	0.5919	0.142	0.5478	T	C	0.2282	942	0.2515	334	0.2155	608	0.096	500	0.1505	206	0.05782	294	0.4955	222	0.4259	54	0.4702	168	0.1842	76	0.2	20
C1_M4504	1	39987168	0.7929	0.6628	0.9782	0.8681	1.19	8.38e-05	0.01361	0.179	0.1374	0.02062	T	TC	intergenic	MFSD2A;CAP1	dist=17200;dist=53072	rs397727653	1	39987168	8.38e-05	0.01361	0.179	0.1374	0.02062	T	TC	0.1529	942	0.2186	334	0.1168	608	0.148	500	0.199	206	0.1122	294	0.0991	222	0.1667	54	0.07738	168	0.2895	76	0.4	20
rs10889117	1	40005564	0.7816	0.6155	1.352	0.4374	1.356	0.0001192	0.02141	0.08216	0.4557	0.01283	G	A	intergenic	MFSD2A;CAP1	dist=35596;dist=34676	.	1	40005564	0.0001192	0.02141	0.08216	0.4557	0.01283	A	G	0.1518	942	0.2156	334	0.1168	608	0.146	500	0.1942	206	0.1122	294	0.1036	222	0.1481	54	0.08929	168	0.2895	76	0.45	20
rs7511845	1	68199491	0.7201	0.3185	1.508	2.044	-0.6392	0.003515	0.3709	0.3175	9.71e-05	0.4878	C	T	ncRNA_intronic	GNG12-AS1	.	.	1	68199491	0.003515	0.3709	0.3175	9.71e-05	0.4878	C	T	0.09342	942	0.1198	334	0.07895	608	0.08	500	0.08738	206	0.07483	294	0.1667	222	0.3519	54	0.1071	168	0.02632	76	0.05	20
rs2291690	1	77566500	1.444	2.786	1.629	0.5499	NA	5.27e-05	0.01142	0.05571	0.306	NA	G	A	intronic	ZZZ3	.	.	1	77566500	5.27e-05	0.01142	0.05571	0.306	NA	G	A	0.04449	944	0.07186	334	0.02951	610	0.01793	502	0.03883	206	0.003378	296	0.09009	222	0.1296	54	0.07738	168	0.1184	76	0.25	20
rs2270539	1	77581943	1.444	2.786	1.629	0.5499	NA	5.27e-05	0.01142	0.05571	0.306	NA	G	T	intronic	ZZZ3	.	.	1	77581943	5.27e-05	0.01142	0.05571	0.306	NA	G	T	0.04449	944	0.07186	334	0.02951	610	0.01793	502	0.03883	206	0.003378	296	0.09009	222	0.1296	54	0.07738	168	0.1184	76	0.25	20
rs146834284	1	77587286	1.436	2.766	NA	0.5376	NA	5.75e-05	0.01189	NA	0.3171	NA	G	A	intronic	ZZZ3	.	.	1	77587286	5.75e-05	0.01189	NA	0.3171	NA	G	A	0.04468	940	0.07186	334	0.0297	606	0.018	500	0.03883	206	0.003401	294	0.09091	220	0.1296	54	0.07831	166	0.1184	76	0.25	20
rs143791392	1	77587303	1.436	2.766	1.629	0.5376	NA	5.75e-05	0.01189	0.05571	0.3171	NA	T	C	intronic	ZZZ3	.	.	1	77587303	5.75e-05	0.01189	0.05571	0.3171	NA	T	C	0.04468	940	0.07186	334	0.0297	606	0.018	500	0.03883	206	0.003401	294	0.09091	220	0.1296	54	0.07831	166	0.1184	76	0.25	20
rs76106270	1	77591643	1.442	2.766	1.629	0.5499	NA	5.36e-05	0.01189	0.05571	0.306	NA	T	C	intronic	ZZZ3	.	.	1	77591643	5.36e-05	0.01189	0.05571	0.306	NA	T	C	0.04459	942	0.07186	334	0.02961	608	0.018	500	0.03883	206	0.003401	294	0.09009	222	0.1296	54	0.07738	168	0.1184	76	0.25	20
rs80166107	1	77597458	1.444	2.786	1.629	0.5499	NA	5.27e-05	0.01142	0.05571	0.306	NA	C	G	intronic	ZZZ3	.	.	1	77597458	5.27e-05	0.01142	0.05571	0.306	NA	C	G	0.04449	944	0.07186	334	0.02951	610	0.01793	502	0.03883	206	0.003378	296	0.09009	222	0.1296	54	0.07738	168	0.1184	76	0.25	20
rs74745650	1	77598781	1.439	2.766	1.629	0.5499	NA	5.6e-05	0.01189	0.05571	0.306	NA	G	A	intronic	ZZZ3	.	.	1	77598781	5.6e-05	0.01189	0.05571	0.306	NA	G	A	0.04468	940	0.07186	334	0.0297	606	0.018	500	0.03883	206	0.003401	294	0.09009	222	0.1296	54	0.07738	168	0.1184	76	0.25	20
rs17100791	1	77600756	1.443	2.778	1.629	0.5499	NA	5.24e-05	0.01147	0.05571	0.306	NA	G	A	intronic	ZZZ3	.	.	1	77600756	5.24e-05	0.01147	0.05571	0.306	NA	G	A	0.04584	938	0.07229	332	0.03135	606	0.01815	496	0.03922	204	0.003425	292	0.09459	222	0.1296	54	0.08333	168	0.1184	76	0.25	20
rs115621296	1	77659870	1.444	2.786	1.629	0.5499	NA	5.27e-05	0.01142	0.05571	0.306	NA	G	T	intronic	ZZZ3	.	.	1	77659870	5.27e-05	0.01142	0.05571	0.306	NA	G	T	0.04555	944	0.07186	334	0.03115	610	0.01793	502	0.03883	206	0.003378	296	0.09459	222	0.1296	54	0.08333	168	0.1184	76	0.25	20
rs12409530	1	80955255	-0.7744	-0.9974	-1.056	-0.6408	-0.1168	7.06e-05	3.82e-05	0.3835	0.3205	0.8064	C	T	intergenic	LINC01781;ADGRL2	dist=308467;dist=350937	.	1	80955255	7.06e-05	3.82e-05	0.3835	0.3205	0.8064	C	T	0.2452	938	0.1976	334	0.2715	604	0.314	500	0.2233	206	0.3776	294	0.1171	222	0.09259	54	0.125	168	0.1351	74	0.05	20
rs72682518	1	80974159	-0.7465	-0.9762	-0.9046	-0.6889	-0.08314	0.0001009	4.74e-05	0.4771	0.2859	0.8496	A	G	intergenic	LINC01781;ADGRL2	dist=327371;dist=332033	.	1	80974159	0.0001009	4.74e-05	0.4771	0.2859	0.8496	A	G	0.2489	944	0.2066	334	0.2721	610	0.3167	502	0.2282	206	0.3784	296	0.1216	222	0.09259	54	0.131	168	0.1053	76	0.05	20
rs11578062	1	114327685	0.6909	0.7379	0.8238	0.2348	1.19	8.81e-05	0.0004014	0.5031	0.6283	0.06435	C	G	intergenic	SYT6;TRIM33	dist=173816;dist=65108	.	1	114327685	8.81e-05	0.0004014	0.5031	0.6283	0.06435	C	G	0.2197	942	0.3024	334	0.1743	608	0.3	500	0.3883	206	0.2381	294	0.1577	222	0.1852	54	0.1488	168	0.07895	76	0.1	20
rs1418452	1	117327756	1.107	1.192	0.9778	0.7428	1.888	2.28e-05	0.0001012	0.2193	0.4657	0.1594	T	G	intergenic	LINC01525;MAN1A2	dist=6420;dist=39693	.	1	117327756	2.28e-05	0.0001012	0.2193	0.4657	0.1594	T	G	0.08705	942	0.1437	334	0.05592	608	0.126	500	0.1942	206	0.07823	294	0.02703	222	0.03704	54	0.02381	168	0.1316	76	0.2	20
C1_M13398	1	117342412	1.082	1.146	0.9396	1.215	1.888	3.18e-05	0.0001633	0.255	0.2062	0.1594	C	CA	intergenic	LINC01525;MAN1A2	dist=21076;dist=25037	rs11430027	1	117342412	3.18e-05	0.0001633	0.255	0.2062	0.1594	CA	C	0.08792	944	0.1437	334	0.05738	610	0.1275	502	0.1942	206	0.08108	296	0.03153	222	0.05556	54	0.02381	168	0.1184	76	0.15	20
rs112213152	1	117352818	1.043	1.107	NA	0.6931	1.888	8.6e-05	0.0004062	NA	0.4932	0.1594	G	T	intergenic	LINC01525;MAN1A2	dist=31482;dist=14631	.	1	117352818	8.6e-05	0.0004062	NA	0.4932	0.1594	G	T	0.0828	930	0.1341	328	0.05482	602	0.1184	490	0.18	200	0.07586	290	0.03153	222	0.03704	54	0.02976	168	0.1216	74	0.2	20
rs9783031	1	117367515	1.071	1.14	NA	0.6433	1.888	6.1e-05	0.0003059	NA	0.524	0.1594	G	T	UTR5	MAN1A2	NM_006699.5:c.-669G>T	.	1	117367515	6.1e-05	0.0003059	NA	0.524	0.1594	G	T	0.0837	920	0.1364	330	0.05424	590	0.1203	482	0.1832	202	0.075	280	0.03211	218	0.03704	54	0.03049	164	0.1184	76	0.2	20
rs11587759	1	117372502	1.086	1.099	1.956	0.7428	1.923	4.86e-05	0.0002974	0.06102	0.4657	0.1521	T	A	intronic	MAN1A2	.	.	1	117372502	4.86e-05	0.0002974	0.06102	0.4657	0.1521	T	A	0.08404	940	0.1377	334	0.05446	606	0.126	500	0.1893	206	0.08163	294	0.02703	222	0.03704	54	0.02381	168	0.09211	76	0.15	20
rs139509107	1	117372791	1.065	1.098	1.692	0.9769	1.923	4.51e-05	0.0003065	0.05682	0.3484	0.1521	A	AT	intronic	MAN1A2	.	rs139509107	1	117372791	4.51e-05	0.0003065	0.05682	0.3484	0.1521	AT	A	0.08742	938	0.1416	332	0.05776	606	0.126	500	0.1893	206	0.08163	294	0.03182	220	0.03846	52	0.02976	168	0.1184	76	0.2	20
rs10923274	1	117376113	1.051	1.099	1.692	0.6931	1.888	5.3e-05	0.0002974	0.05682	0.4932	0.1594	T	C	intronic	MAN1A2	.	.	1	117376113	5.3e-05	0.0002974	0.05682	0.4932	0.1594	T	C	0.08705	942	0.1407	334	0.05757	608	0.126	500	0.1893	206	0.08163	294	0.03153	222	0.03704	54	0.02976	168	0.1184	76	0.2	20
rs61809512	1	117376308	1.088	1.099	1.956	0.7428	1.888	4.71e-05	0.0002974	0.06102	0.4657	0.1594	G	A	intronic	MAN1A2	.	.	1	117376308	4.71e-05	0.0002974	0.06102	0.4657	0.1594	G	A	0.08386	942	0.1377	334	0.05428	608	0.126	500	0.1893	206	0.08163	294	0.02703	222	0.03704	54	0.02381	168	0.09211	76	0.15	20
rs10923275	1	117376392	1.056	1.104	1.692	0.6931	1.888	4.87e-05	0.0002823	0.05682	0.4932	0.1594	G	A	intronic	MAN1A2	.	.	1	117376392	4.87e-05	0.0002823	0.05682	0.4932	0.1594	G	A	0.08686	944	0.1407	334	0.05738	610	0.1255	502	0.1893	206	0.08108	296	0.03153	222	0.03704	54	0.02976	168	0.1184	76	0.2	20
rs10801957	1	117377406	1.051	1.099	1.692	0.6931	1.888	5.3e-05	0.0002974	0.05682	0.4932	0.1594	C	T	intronic	MAN1A2	.	.	1	117377406	5.3e-05	0.0002974	0.05682	0.4932	0.1594	C	T	0.08705	942	0.1407	334	0.05757	608	0.126	500	0.1893	206	0.08163	294	0.03153	222	0.03704	54	0.02976	168	0.1184	76	0.2	20
rs150147786	1	117377685	1.051	1.099	1.692	0.6931	1.888	5.3e-05	0.0002974	0.05682	0.4932	0.1594	T	TTG	intronic	MAN1A2	.	rs150115826	1	117377685	5.3e-05	0.0002974	0.05682	0.4932	0.1594	TTG	T	0.08705	942	0.1407	334	0.05757	608	0.126	500	0.1893	206	0.08163	294	0.03153	222	0.03704	54	0.02976	168	0.1184	76	0.2	20
rs77807296	1	117377689	1.051	1.099	1.692	0.6931	1.895	5.29e-05	0.0002974	0.05682	0.4932	0.1583	T	G	intronic	MAN1A2	.	.	1	117377689	5.29e-05	0.0002974	0.05682	0.4932	0.1583	T	G	0.08723	940	0.1407	334	0.05776	606	0.126	500	0.1893	206	0.08163	294	0.03153	222	0.03704	54	0.02976	168	0.1184	76	0.2	20
rs10923278	1	117379379	1.043	1.091	1.692	0.6931	1.923	6.08e-05	0.000333	0.05682	0.4932	0.1521	C	T	intronic	MAN1A2	.	.	1	117379379	6.08e-05	0.000333	0.05682	0.4932	0.1521	C	T	0.08742	938	0.1407	334	0.05795	604	0.1265	498	0.1893	206	0.08219	292	0.03153	222	0.03704	54	0.02976	168	0.1184	76	0.2	20
rs61809515	1	117381450	1.073	1.188	1.149	0.6931	1.895	4.71e-05	0.0001293	0.1724	0.4932	0.1583	C	T	intronic	MAN1A2	.	.	1	117381450	4.71e-05	0.0001293	0.1724	0.4932	0.1583	C	T	0.08422	938	0.1377	334	0.05464	604	0.1225	498	0.1893	206	0.07534	292	0.03153	222	0.03704	54	0.02976	168	0.1053	76	0.15	20
rs4466644	1	117382621	1.127	1.144	1.733	0.6931	1.888	1.43e-05	0.0001642	0.04777	0.4932	0.1594	T	C	intronic	MAN1A2	.	.	1	117382621	1.43e-05	0.0001642	0.04777	0.4932	0.1594	T	C	0.08917	942	0.1467	334	0.05757	608	0.128	500	0.1942	206	0.08163	294	0.03153	222	0.03704	54	0.02976	168	0.1316	76	0.25	20
rs143694657	1	117382683	1.12	1.119	1.956	1.114	1.888	3.12e-05	0.0002417	0.06102	0.2972	0.1594	G	A	intronic	MAN1A2	.	.	1	117382683	3.12e-05	0.0002417	0.06102	0.2972	0.1594	G	A	0.08316	938	0.1386	332	0.05281	606	0.1265	498	0.1912	204	0.08163	294	0.02273	220	0.03704	54	0.01807	166	0.09211	76	0.15	20
C1_M13404	1	117383251	1.044	1.091	1.692	0.6931	1.888	5.91e-05	0.0003339	0.05682	0.4932	0.1594	A	AT	intronic	MAN1A2	.	.	1	117383251	5.91e-05	0.0003339	0.05682	0.4932	0.1594	A	AT	0.08723	940	0.1407	334	0.05776	606	0.1265	498	0.1893	206	0.08219	292	0.03153	222	0.03704	54	0.02976	168	0.1184	76	0.2	20
rs11577335	1	117383513	1.051	1.099	1.692	0.6931	1.888	5.3e-05	0.0002974	0.05682	0.4932	0.1594	A	G	intronic	MAN1A2	.	.	1	117383513	5.3e-05	0.0002974	0.05682	0.4932	0.1594	A	G	0.08705	942	0.1407	334	0.05757	608	0.126	500	0.1893	206	0.08163	294	0.03153	222	0.03704	54	0.02976	168	0.1184	76	0.2	20
rs78922094	1	117383719	1.088	1.099	1.956	0.7428	1.888	4.71e-05	0.0002974	0.06102	0.4657	0.1594	A	G	intronic	MAN1A2	.	.	1	117383719	4.71e-05	0.0002974	0.06102	0.4657	0.1594	A	G	0.08386	942	0.1377	334	0.05428	608	0.126	500	0.1893	206	0.08163	294	0.02703	222	0.03704	54	0.02381	168	0.09211	76	0.15	20
rs17037223	1	117386177	1.051	1.099	1.692	0.6931	1.888	5.3e-05	0.0002974	0.05682	0.4932	0.1594	A	G	intronic	MAN1A2	.	.	1	117386177	5.3e-05	0.0002974	0.05682	0.4932	0.1594	A	G	0.08705	942	0.1407	334	0.05757	608	0.126	500	0.1893	206	0.08163	294	0.03153	222	0.03704	54	0.02976	168	0.1184	76	0.2	20
rs145841958	1	117388172	1.085	1.099	1.956	0.7175	1.888	4.92e-05	0.0002974	0.06102	0.4802	0.1594	A	AAG	intronic	MAN1A2	.	.	1	117388172	4.92e-05	0.0002974	0.06102	0.4802	0.1594	A	AAG	0.0844	936	0.1377	334	0.05482	602	0.126	500	0.1893	206	0.08163	294	0.02778	216	0.03704	54	0.02469	162	0.09211	76	0.15	20
rs17037231	1	117388320	1.051	1.099	1.692	0.6931	1.888	5.3e-05	0.0002974	0.05682	0.4932	0.1594	G	A	intronic	MAN1A2	.	.	1	117388320	5.3e-05	0.0002974	0.05682	0.4932	0.1594	G	A	0.08705	942	0.1407	334	0.05757	608	0.126	500	0.1893	206	0.08163	294	0.03153	222	0.03704	54	0.02976	168	0.1184	76	0.2	20
rs61809517	1	117388469	1.062	1.113	1.692	0.6931	1.888	4.48e-05	0.000252	0.05682	0.4932	0.1594	G	A	intronic	MAN1A2	.	.	1	117388469	4.48e-05	0.000252	0.05682	0.4932	0.1594	G	A	0.08723	940	0.1416	332	0.05757	608	0.1265	498	0.1912	204	0.08163	294	0.03153	222	0.03704	54	0.02976	168	0.1184	76	0.2	20
rs6662808	1	117389722	1.051	1.099	1.692	0.6931	1.888	5.3e-05	0.0002974	0.05682	0.4932	0.1594	G	T	intronic	MAN1A2	.	.	1	117389722	5.3e-05	0.0002974	0.05682	0.4932	0.1594	G	T	0.08705	942	0.1407	334	0.05757	608	0.126	500	0.1893	206	0.08163	294	0.03153	222	0.03704	54	0.02976	168	0.1184	76	0.2	20
rs12127141	1	117390964	1.085	1.095	1.956	0.7472	1.923	4.9e-05	0.0003181	0.06102	0.4621	0.1521	A	G	intronic	MAN1A2	.	.	1	117390964	4.9e-05	0.0003181	0.06102	0.4621	0.1521	A	G	0.0844	936	0.1377	334	0.05482	602	0.126	500	0.1893	206	0.08163	294	0.02752	218	0.03704	54	0.02439	164	0.09211	76	0.15	20
rs10923281	1	117390987	1.049	1.099	1.692	0.6931	1.923	5.46e-05	0.0002974	0.05682	0.4932	0.1521	A	G	intronic	MAN1A2	.	.	1	117390987	5.46e-05	0.0002974	0.05682	0.4932	0.1521	A	G	0.08723	940	0.1407	334	0.05776	606	0.126	500	0.1893	206	0.08163	294	0.03153	222	0.03704	54	0.02976	168	0.1184	76	0.2	20
rs61808995	1	117394741	1.081	1.09	1.956	0.7428	1.888	5.28e-05	0.0003362	0.06102	0.4657	0.1594	T	C	intronic	MAN1A2	.	.	1	117394741	5.28e-05	0.0003362	0.06102	0.4657	0.1594	T	C	0.08404	940	0.1377	334	0.05446	606	0.1265	498	0.1893	206	0.08219	292	0.02703	222	0.03704	54	0.02381	168	0.09211	76	0.15	20
rs12123364	1	117395654	1.062	1.099	1.765	0.7428	1.888	7.97e-05	0.0002974	0.1653	0.4657	0.1594	C	T	intronic	MAN1A2	.	.	1	117395654	7.97e-05	0.0002974	0.1653	0.4657	0.1594	C	T	0.08174	942	0.1347	334	0.05263	608	0.126	500	0.1893	206	0.08163	294	0.02703	222	0.03704	54	0.02381	168	0.06579	76	0.1	20
rs61808999	1	117396856	1.086	1.099	1.956	0.7428	1.923	4.86e-05	0.0002974	0.06102	0.4657	0.1521	T	G	intronic	MAN1A2	.	.	1	117396856	4.86e-05	0.0002974	0.06102	0.4657	0.1521	T	G	0.08404	940	0.1377	334	0.05446	606	0.126	500	0.1893	206	0.08163	294	0.02703	222	0.03704	54	0.02381	168	0.09211	76	0.15	20
C1_M13406	1	117397066	1.051	1.099	1.692	0.6931	1.888	5.3e-05	0.0002974	0.05682	0.4932	0.1594	A	AC	intronic	MAN1A2	.	.	1	117397066	5.3e-05	0.0002974	0.05682	0.4932	0.1594	A	AC	0.08705	942	0.1407	334	0.05757	608	0.126	500	0.1893	206	0.08163	294	0.03153	222	0.03704	54	0.02976	168	0.1184	76	0.2	20
rs61809002	1	117397948	1.051	1.099	1.692	0.6931	1.888	5.3e-05	0.0002974	0.05682	0.4932	0.1594	A	G	intronic	MAN1A2	.	.	1	117397948	5.3e-05	0.0002974	0.05682	0.4932	0.1594	A	G	0.08705	942	0.1407	334	0.05757	608	0.126	500	0.1893	206	0.08163	294	0.03153	222	0.03704	54	0.02976	168	0.1184	76	0.2	20
rs11583061	1	117398905	1.081	1.099	1.956	0.6672	1.888	5.23e-05	0.0002974	0.06102	0.5123	0.1594	A	G	intronic	MAN1A2	.	.	1	117398905	5.23e-05	0.0002974	0.06102	0.5123	0.1594	A	G	0.08422	938	0.1377	334	0.05464	604	0.126	500	0.1893	206	0.08163	294	0.02752	218	0.03704	54	0.02439	164	0.09211	76	0.15	20
rs12131109	1	117400240	1.088	1.099	1.956	0.7428	1.888	4.71e-05	0.0002974	0.06102	0.4657	0.1594	A	G	intronic	MAN1A2	.	.	1	117400240	4.71e-05	0.0002974	0.06102	0.4657	0.1594	A	G	0.08386	942	0.1377	334	0.05428	608	0.126	500	0.1893	206	0.08163	294	0.02703	222	0.03704	54	0.02381	168	0.09211	76	0.15	20
rs17037253	1	117401571	1.051	1.099	1.692	0.6931	1.888	5.3e-05	0.0002974	0.05682	0.4932	0.1594	C	G	intronic	MAN1A2	.	.	1	117401571	5.3e-05	0.0002974	0.05682	0.4932	0.1594	C	G	0.08705	942	0.1407	334	0.05757	608	0.126	500	0.1893	206	0.08163	294	0.03153	222	0.03704	54	0.02976	168	0.1184	76	0.2	20
rs61809004	1	117403552	1.049	1.095	1.692	0.6931	1.888	5.44e-05	0.0003183	0.05682	0.4932	0.1594	G	C	intronic	MAN1A2	.	.	1	117403552	5.44e-05	0.0003183	0.05682	0.4932	0.1594	G	C	0.08723	940	0.1416	332	0.05757	608	0.126	500	0.1893	206	0.08163	294	0.03153	222	0.03704	54	0.02976	168	0.1184	76	0.2	20
rs10923284	1	117403971	1.104	1.099	1.956	1.012	1.888	3.85e-05	0.0002974	0.06102	0.3324	0.1594	G	A	intronic	MAN1A2	.	.	1	117403971	3.85e-05	0.0002974	0.06102	0.3324	0.1594	G	A	0.08422	938	0.1386	332	0.05446	606	0.126	500	0.1893	206	0.08163	294	0.02752	218	0.03846	52	0.0241	166	0.09211	76	0.15	20
rs10754344	1	117404338	1.051	1.099	1.692	0.6931	1.888	5.3e-05	0.0002974	0.05682	0.4932	0.1594	A	G	intronic	MAN1A2	.	.	1	117404338	5.3e-05	0.0002974	0.05682	0.4932	0.1594	A	G	0.08705	942	0.1407	334	0.05757	608	0.126	500	0.1893	206	0.08163	294	0.03153	222	0.03704	54	0.02976	168	0.1184	76	0.2	20
rs4460623	1	117404623	1.051	1.099	1.692	0.6931	1.888	5.3e-05	0.0002974	0.05682	0.4932	0.1594	C	T	intronic	MAN1A2	.	.	1	117404623	5.3e-05	0.0002974	0.05682	0.4932	0.1594	C	T	0.08705	942	0.1407	334	0.05757	608	0.126	500	0.1893	206	0.08163	294	0.03153	222	0.03704	54	0.02976	168	0.1184	76	0.2	20
rs10923285	1	117404886	1.056	1.104	1.692	0.6931	1.888	4.87e-05	0.0002823	0.05682	0.4932	0.1594	G	C	intronic	MAN1A2	.	.	1	117404886	4.87e-05	0.0002823	0.05682	0.4932	0.1594	G	C	0.08686	944	0.1407	334	0.05738	610	0.1255	502	0.1893	206	0.08108	296	0.03153	222	0.03704	54	0.02976	168	0.1184	76	0.2	20
C1_117407111	1	117407111	1.077	1.104	2.881	0.7356	1.923	6.62e-05	0.0002823	0.06705	0.4697	0.1521	G	GA	intronic	MAN1A2	.	rs140717342	1	117407111	6.62e-05	0.0002823	0.06705	0.4697	0.1521	GA	G	0.08226	936	0.1355	332	0.05298	604	0.1255	502	0.1893	206	0.08108	296	0.02752	218	0.03704	54	0.02439	164	0.06757	74	0.1111	18
rs2359247	1	117411268	1.054	1.104	1.692	0.6931	1.923	5.02e-05	0.0002823	0.05682	0.4932	0.1521	G	A	intronic	MAN1A2	.	.	1	117411268	5.02e-05	0.0002823	0.05682	0.4932	0.1521	G	A	0.08705	942	0.1407	334	0.05757	608	0.1255	502	0.1893	206	0.08108	296	0.03153	222	0.03704	54	0.02976	168	0.1184	76	0.2	20
rs7546280	1	117414017	1.049	1.099	1.692	0.709	1.923	5.52e-05	0.0002974	0.05682	0.4828	0.1521	C	T	intronic	MAN1A2	.	.	1	117414017	5.52e-05	0.0002974	0.05682	0.4828	0.1521	C	T	0.08761	936	0.1424	330	0.05776	606	0.126	500	0.1893	206	0.08163	294	0.03182	220	0.03846	52	0.02976	168	0.1184	76	0.2	20
rs61805762	1	117415063	1.093	1.104	1.956	0.7428	1.888	4.32e-05	0.0002823	0.06102	0.4657	0.1594	A	C	intronic	MAN1A2	.	.	1	117415063	4.32e-05	0.0002823	0.06102	0.4657	0.1594	A	C	0.08369	944	0.1377	334	0.0541	610	0.1255	502	0.1893	206	0.08108	296	0.02703	222	0.03704	54	0.02381	168	0.09211	76	0.15	20
rs61805763	1	117415799	1.051	1.099	1.692	0.6931	1.888	5.3e-05	0.0002974	0.05682	0.4932	0.1594	G	A	intronic	MAN1A2	.	.	1	117415799	5.3e-05	0.0002974	0.05682	0.4932	0.1594	G	A	0.08705	942	0.1407	334	0.05757	608	0.126	500	0.1893	206	0.08163	294	0.03153	222	0.03704	54	0.02976	168	0.1184	76	0.2	20
C1_M13411	1	117416122	1.086	1.099	1.956	0.7428	1.923	4.86e-05	0.0002974	0.06102	0.4657	0.1521	A	AT	intronic	MAN1A2	.	rs930186563	1	117416122	4.86e-05	0.0002974	0.06102	0.4657	0.1521	A	AT	0.08404	940	0.1377	334	0.05446	606	0.126	500	0.1893	206	0.08163	294	0.02703	222	0.03704	54	0.02381	168	0.09211	76	0.15	20
rs10923289	1	117418588	1.054	1.104	1.692	0.6931	1.923	5.02e-05	0.0002823	0.05682	0.4932	0.1521	C	T	intronic	MAN1A2	.	.	1	117418588	5.02e-05	0.0002823	0.05682	0.4932	0.1521	C	T	0.08705	942	0.1407	334	0.05757	608	0.1255	502	0.1893	206	0.08108	296	0.03153	222	0.03704	54	0.02976	168	0.1184	76	0.2	20
rs12116979	1	117418762	1.046	1.099	1.656	0.6932	1.923	5.75e-05	0.0002974	0.06194	0.4926	0.1521	G	C	intronic	MAN1A2	.	.	1	117418762	5.75e-05	0.0002974	0.06194	0.4926	0.1521	G	C	0.08761	936	0.1407	334	0.05814	602	0.126	500	0.1893	206	0.08163	294	0.03182	220	0.03704	54	0.03012	166	0.1216	74	0.2	20
rs12117443	1	117423945	1.053	1.107	1.956	0.7542	0.7373	7.33e-05	0.000291	0.06102	0.4579	0.5103	T	C	intronic	MAN1A2	.	.	1	117423945	7.33e-05	0.000291	0.06102	0.4579	0.5103	T	C	0.0871	930	0.1433	328	0.05648	602	0.128	492	0.1931	202	0.08276	290	0.02727	220	0.03846	52	0.02381	168	0.1081	74	0.2	20
rs12140576	1	117428725	1.115	1.11	NA	0.7048	1.821	3.57e-05	0.0002754	NA	0.4879	0.1754	G	A	intronic	MAN1A2	.	.	1	117428725	3.57e-05	0.0002754	NA	0.4879	0.1754	G	A	0.08571	910	0.142	324	0.05461	586	0.1302	484	0.197	198	0.08392	286	0.02752	218	0.03846	52	0.0241	166	0.08571	70	0.15	20
rs11576543	1	117431559	1.055	1.104	1.692	0.6823	1.888	4.88e-05	0.0002823	0.05682	0.4996	0.1594	A	G	intronic	MAN1A2	.	.	1	117431559	4.88e-05	0.0002823	0.05682	0.4996	0.1594	A	G	0.08705	942	0.1407	334	0.05757	608	0.1255	502	0.1893	206	0.08108	296	0.03182	220	0.03704	54	0.03012	166	0.1184	76	0.2	20
rs10923291	1	117432712	1.078	1.136	1.692	0.6931	1.888	3.81e-05	0.0002112	0.05682	0.4932	0.1594	T	C	intronic	MAN1A2	.	.	1	117432712	3.81e-05	0.0002112	0.05682	0.4932	0.1594	T	C	0.08617	940	0.1407	334	0.05611	606	0.1245	498	0.1893	206	0.07877	292	0.03153	222	0.03704	54	0.02976	168	0.1184	76	0.2	20
rs7533053	1	117433011	1.043	1.095	1.692	0.6833	1.923	6e-05	0.0003187	0.05682	0.4992	0.1521	C	G	intronic	MAN1A2	.	.	1	117433011	6e-05	0.0003187	0.05682	0.4992	0.1521	C	G	0.08761	936	0.1407	334	0.05814	602	0.126	500	0.1893	206	0.08163	294	0.03211	218	0.03704	54	0.03049	164	0.1184	76	0.2	20
rs1316326	1	117438133	1.086	1.099	1.956	0.7428	1.923	4.86e-05	0.0002974	0.06102	0.4657	0.1521	A	G	intronic	MAN1A2	.	.	1	117438133	4.86e-05	0.0002974	0.06102	0.4657	0.1521	A	G	0.08404	940	0.1377	334	0.05446	606	0.126	500	0.1893	206	0.08163	294	0.02703	222	0.03704	54	0.02381	168	0.09211	76	0.15	20
C1_117438323	1	117438323	1.071	1.078	1.956	0.7428	1.923	6.48e-05	0.0004096	0.06102	0.4657	0.1521	C	CT	intronic	MAN1A2	.	rs141467989	1	117438323	6.48e-05	0.0004096	0.06102	0.4657	0.1521	CT	C	0.08298	940	0.1355	332	0.05428	608	0.124	500	0.1863	204	0.08108	296	0.02703	222	0.03704	54	0.02381	168	0.09211	76	0.15	20
C1_117438352	1	117438352	1.054	1.104	1.692	0.6931	1.923	5.02e-05	0.0002823	0.05682	0.4932	0.1521	G	GT	intronic	MAN1A2	.	rs149598021	1	117438352	5.02e-05	0.0002823	0.05682	0.4932	0.1521	GT	G	0.08705	942	0.1407	334	0.05757	608	0.1255	502	0.1893	206	0.08108	296	0.03153	222	0.03704	54	0.02976	168	0.1184	76	0.2	20
rs12145435	1	117438402	1.086	1.095	1.956	0.7428	1.888	4.84e-05	0.0003173	0.06102	0.4657	0.1594	G	A	intronic	MAN1A2	.	.	1	117438402	4.84e-05	0.0003173	0.06102	0.4657	0.1594	G	A	0.08386	942	0.1377	334	0.05428	608	0.126	500	0.1893	206	0.08163	294	0.02703	222	0.03704	54	0.02381	168	0.09211	76	0.15	20
rs10923295	1	117438591	1.051	1.099	1.692	0.6931	1.888	5.3e-05	0.0002974	0.05682	0.4932	0.1594	C	A	intronic	MAN1A2	.	.	1	117438591	5.3e-05	0.0002974	0.05682	0.4932	0.1594	C	A	0.08705	942	0.1407	334	0.05757	608	0.126	500	0.1893	206	0.08163	294	0.03153	222	0.03704	54	0.02976	168	0.1184	76	0.2	20
rs10923296	1	117439832	1.062	1.099	1.765	0.7428	1.888	7.97e-05	0.0002974	0.1653	0.4657	0.1594	T	A	intronic	MAN1A2	.	.	1	117439832	7.97e-05	0.0002974	0.1653	0.4657	0.1594	T	A	0.08174	942	0.1347	334	0.05263	608	0.126	500	0.1893	206	0.08163	294	0.02703	222	0.03704	54	0.02381	168	0.06579	76	0.1	20
rs12121217	1	117440685	1.079	1.149	1.692	0.6836	1.856	3.85e-05	0.0001929	0.05682	0.4995	0.1677	T	G	intronic	MAN1A2	.	.	1	117440685	3.85e-05	0.0001929	0.05682	0.4995	0.1677	T	G	0.0871	930	0.1416	332	0.05686	598	0.1255	494	0.1912	204	0.07931	290	0.03182	220	0.03704	54	0.03012	166	0.1184	76	0.2	20
rs10923299	1	117443043	1.091	1.104	1.956	0.7428	1.923	4.47e-05	0.0002823	0.06102	0.4657	0.1521	T	C	intronic	MAN1A2	.	.	1	117443043	4.47e-05	0.0002823	0.06102	0.4657	0.1521	T	C	0.08386	942	0.1377	334	0.05428	608	0.1255	502	0.1893	206	0.08108	296	0.02703	222	0.03704	54	0.02381	168	0.09211	76	0.15	20
rs12184255	1	117443504	1.056	1.104	1.692	0.6931	1.888	4.87e-05	0.0002823	0.05682	0.4932	0.1594	G	C	intronic	MAN1A2	.	.	1	117443504	4.87e-05	0.0002823	0.05682	0.4932	0.1594	G	C	0.08686	944	0.1407	334	0.05738	610	0.1255	502	0.1893	206	0.08108	296	0.03153	222	0.03704	54	0.02976	168	0.1184	76	0.2	20
rs149554466	1	117444295	1.054	1.104	NA	0.6931	1.923	5.02e-05	0.0002823	NA	0.4932	0.1521	C	CT	intronic	MAN1A2	.	.	1	117444295	5.02e-05	0.0002823	NA	0.4932	0.1521	C	CT	0.08705	942	0.1407	334	0.05757	608	0.1255	502	0.1893	206	0.08108	296	0.03153	222	0.03704	54	0.02976	168	0.1184	76	0.2	20
rs61805788	1	117444298	1.049	1.099	NA	0.6931	1.923	5.46e-05	0.0002974	NA	0.4932	0.1521	A	C	intronic	MAN1A2	.	.	1	117444298	5.46e-05	0.0002974	NA	0.4932	0.1521	A	C	0.08723	940	0.1407	334	0.05776	606	0.126	500	0.1893	206	0.08163	294	0.03153	222	0.03704	54	0.02976	168	0.1184	76	0.2	20
rs11577788	1	117449027	1.056	1.104	1.692	0.6931	1.888	4.87e-05	0.0002823	0.05682	0.4932	0.1594	A	G	intronic	MAN1A2	.	.	1	117449027	4.87e-05	0.0002823	0.05682	0.4932	0.1594	A	G	0.08686	944	0.1407	334	0.05738	610	0.1255	502	0.1893	206	0.08108	296	0.03153	222	0.03704	54	0.02976	168	0.1184	76	0.2	20
rs114683388	1	117450770	1.088	1.099	1.956	0.7428	1.888	4.71e-05	0.0002974	0.06102	0.4657	0.1594	T	A	intronic	MAN1A2	.	.	1	117450770	4.71e-05	0.0002974	0.06102	0.4657	0.1594	T	A	0.08386	942	0.1377	334	0.05428	608	0.126	500	0.1893	206	0.08163	294	0.02703	222	0.03704	54	0.02381	168	0.09211	76	0.15	20
C1_M13415	1	117452860	1.088	1.099	1.956	0.7428	1.888	4.71e-05	0.0002974	0.06102	0.4657	0.1594	G	GC	intronic	MAN1A2	.	.	1	117452860	4.71e-05	0.0002974	0.06102	0.4657	0.1594	G	GC	0.08386	942	0.1377	334	0.05428	608	0.126	500	0.1893	206	0.08163	294	0.02703	222	0.03704	54	0.02381	168	0.09211	76	0.15	20
rs11581669	1	117454286	1.093	1.104	1.956	0.7428	1.888	4.32e-05	0.0002823	0.06102	0.4657	0.1594	T	C	intronic	MAN1A2	.	.	1	117454286	4.32e-05	0.0002823	0.06102	0.4657	0.1594	T	C	0.08369	944	0.1377	334	0.0541	610	0.1255	502	0.1893	206	0.08108	296	0.02703	222	0.03704	54	0.02381	168	0.09211	76	0.15	20
rs10923303	1	117454390	1.056	1.104	1.692	0.6931	1.888	4.87e-05	0.0002823	0.05682	0.4932	0.1594	A	G	intronic	MAN1A2	.	.	1	117454390	4.87e-05	0.0002823	0.05682	0.4932	0.1594	A	G	0.08686	944	0.1407	334	0.05738	610	0.1255	502	0.1893	206	0.08108	296	0.03153	222	0.03704	54	0.02976	168	0.1184	76	0.2	20
rs61805792	1	117455052	1.051	1.099	1.692	0.6932	1.992	5.26e-05	0.0002974	0.05682	0.4926	0.139	C	T	intronic	MAN1A2	.	.	1	117455052	5.26e-05	0.0002974	0.05682	0.4926	0.139	C	T	0.08761	936	0.1416	332	0.05795	604	0.126	500	0.1893	206	0.08163	294	0.03182	220	0.03704	54	0.03012	166	0.1184	76	0.2	20
rs61805793	1	117457302	1.051	1.099	1.692	0.6931	1.888	5.3e-05	0.0002974	0.05682	0.4932	0.1594	T	G	intronic	MAN1A2	.	.	1	117457302	5.3e-05	0.0002974	0.05682	0.4932	0.1594	T	G	0.08705	942	0.1407	334	0.05757	608	0.126	500	0.1893	206	0.08163	294	0.03153	222	0.03704	54	0.02976	168	0.1184	76	0.2	20
rs144935653	1	117457410	1.112	1.141	1.956	0.7428	1.923	3.37e-05	0.0001971	0.06102	0.4657	0.1521	C	CTCATCA	intronic	MAN1A2	.	.	1	117457410	3.37e-05	0.0001971	0.06102	0.4657	0.1521	C	CTCATCA	0.0844	936	0.1394	330	0.05446	606	0.127	496	0.1931	202	0.08163	294	0.02703	222	0.03704	54	0.02381	168	0.09211	76	0.15	20
rs12120302	1	117458221	1.026	1.077	1.692	0.6202	1.89	8e-05	0.000395	0.05682	0.5399	0.1589	G	A	intronic	MAN1A2	.	.	1	117458221	8e-05	0.000395	0.05682	0.5399	0.1589	G	A	0.08855	926	0.1407	334	0.05912	592	0.1275	494	0.1893	206	0.08333	288	0.03241	216	0.03704	54	0.03086	162	0.1184	76	0.2	20
rs61805796	1	117461789	1.088	1.099	1.956	0.7428	1.888	4.71e-05	0.0002974	0.06102	0.4657	0.1594	G	A	intronic	MAN1A2	.	.	1	117461789	4.71e-05	0.0002974	0.06102	0.4657	0.1594	G	A	0.08386	942	0.1377	334	0.05428	608	0.126	500	0.1893	206	0.08163	294	0.02703	222	0.03704	54	0.02381	168	0.09211	76	0.15	20
rs61805797	1	117462126	1.049	1.099	1.692	0.6931	1.923	5.46e-05	0.0002974	0.05682	0.4932	0.1521	C	A	intronic	MAN1A2	.	.	1	117462126	5.46e-05	0.0002974	0.05682	0.4932	0.1521	C	A	0.08723	940	0.1407	334	0.05776	606	0.126	500	0.1893	206	0.08163	294	0.03153	222	0.03704	54	0.02976	168	0.1184	76	0.2	20
rs17037307	1	117463912	1.086	1.099	1.956	0.7388	1.923	4.86e-05	0.0002974	0.06102	0.4684	0.1521	C	A	intronic	MAN1A2	.	.	1	117463912	4.86e-05	0.0002974	0.06102	0.4684	0.1521	C	A	0.08422	938	0.1377	334	0.05464	604	0.126	500	0.1893	206	0.08163	294	0.02727	220	0.03704	54	0.0241	166	0.09211	76	0.15	20
rs17037310	1	117464418	1.051	1.099	1.692	0.6931	1.888	5.3e-05	0.0002974	0.05682	0.4932	0.1594	A	G	intronic	MAN1A2	.	.	1	117464418	5.3e-05	0.0002974	0.05682	0.4932	0.1594	A	G	0.08705	942	0.1407	334	0.05757	608	0.126	500	0.1893	206	0.08163	294	0.03153	222	0.03704	54	0.02976	168	0.1184	76	0.2	20
rs12126528	1	117465956	1.087	1.104	1.956	0.7356	1.923	4.75e-05	0.0002823	0.06102	0.4697	0.1521	T	G	intronic	MAN1A2	.	.	1	117465956	4.75e-05	0.0002823	0.06102	0.4697	0.1521	T	G	0.08422	938	0.1377	334	0.05464	604	0.1255	502	0.1893	206	0.08108	296	0.02752	218	0.03704	54	0.02439	164	0.09211	76	0.15	20
rs12134265	1	117466185	1.051	1.099	1.692	0.6931	1.888	5.3e-05	0.0002974	0.05682	0.4932	0.1594	T	C	intronic	MAN1A2	.	.	1	117466185	5.3e-05	0.0002974	0.05682	0.4932	0.1594	T	C	0.08705	942	0.1407	334	0.05757	608	0.126	500	0.1893	206	0.08163	294	0.03153	222	0.03704	54	0.02976	168	0.1184	76	0.2	20
rs61805799	1	117466754	1.088	1.104	1.37	0.7428	1.888	4.02e-05	0.0002823	0.1407	0.4657	0.1594	A	G	intronic	MAN1A2	.	.	1	117466754	4.02e-05	0.0002823	0.1407	0.4657	0.1594	A	G	0.08686	944	0.1407	334	0.05738	610	0.1255	502	0.1893	206	0.08108	296	0.02703	222	0.03704	54	0.02381	168	0.1316	76	0.2	20
rs12135190	1	117466812	1.067	1.104	1.765	0.7428	1.888	7.36e-05	0.0002823	0.1653	0.4657	0.1594	A	C	intronic	MAN1A2	.	.	1	117466812	7.36e-05	0.0002823	0.1653	0.4657	0.1594	A	C	0.08157	944	0.1347	334	0.05246	610	0.1255	502	0.1893	206	0.08108	296	0.02703	222	0.03704	54	0.02381	168	0.06579	76	0.1	20
rs12128776	1	117468429	1.082	1.097	1.956	0.7169	1.923	5.09e-05	0.0003046	0.06102	0.4813	0.1521	A	G	intronic	MAN1A2	.	.	1	117468429	5.09e-05	0.0003046	0.06102	0.4813	0.1521	A	G	0.08422	938	0.1377	334	0.05464	604	0.126	500	0.1893	206	0.08163	294	0.02727	220	0.03704	54	0.0241	166	0.09211	76	0.15	20
rs74418986	1	117469179	1.051	1.099	1.692	0.6931	1.888	5.3e-05	0.0002974	0.05682	0.4932	0.1594	T	C	intronic	MAN1A2	.	.	1	117469179	5.3e-05	0.0002974	0.05682	0.4932	0.1594	T	C	0.08705	942	0.1407	334	0.05757	608	0.126	500	0.1893	206	0.08163	294	0.03153	222	0.03704	54	0.02976	168	0.1184	76	0.2	20
rs17037323	1	117471699	1.049	1.099	1.692	0.6931	1.923	5.46e-05	0.0002974	0.05682	0.4932	0.1521	G	C	intronic	MAN1A2	.	.	1	117471699	5.46e-05	0.0002974	0.05682	0.4932	0.1521	G	C	0.08723	940	0.1407	334	0.05776	606	0.126	500	0.1893	206	0.08163	294	0.03153	222	0.03704	54	0.02976	168	0.1184	76	0.2	20
rs61805817	1	117473409	1.039	1.084	1.692	0.6931	1.888	6.47e-05	0.000363	0.05682	0.4932	0.1594	G	C	intronic	MAN1A2	.	.	1	117473409	6.47e-05	0.000363	0.05682	0.4932	0.1594	G	C	0.08742	938	0.1407	334	0.05795	604	0.127	496	0.1893	206	0.08276	290	0.03153	222	0.03704	54	0.02976	168	0.1184	76	0.2	20
rs12129406	1	117473961	1.051	1.099	1.692	0.6931	1.888	5.3e-05	0.0002974	0.05682	0.4932	0.1594	A	G	intronic	MAN1A2	.	.	1	117473961	5.3e-05	0.0002974	0.05682	0.4932	0.1594	A	G	0.08705	942	0.1407	334	0.05757	608	0.126	500	0.1893	206	0.08163	294	0.03153	222	0.03704	54	0.02976	168	0.1184	76	0.2	20
rs12127779	1	117474794	1.087	1.099	1.956	0.7368	1.888	4.72e-05	0.0002974	0.06102	0.4691	0.1594	C	T	intronic	MAN1A2	.	.	1	117474794	4.72e-05	0.0002974	0.06102	0.4691	0.1594	C	T	0.08404	940	0.1377	334	0.05446	606	0.126	500	0.1893	206	0.08163	294	0.02727	220	0.03704	54	0.0241	166	0.09211	76	0.15	20
C1_M13417	1	117474811	1.05	1.099	1.692	0.6823	1.888	5.31e-05	0.0002974	0.05682	0.4996	0.1594	A	AC	intronic	MAN1A2	.	.	1	117474811	5.31e-05	0.0002974	0.05682	0.4996	0.1594	A	AC	0.08723	940	0.1407	334	0.05776	606	0.126	500	0.1893	206	0.08163	294	0.03182	220	0.03704	54	0.03012	166	0.1184	76	0.2	20
rs10923312	1	117475012	1.051	1.099	1.692	0.6931	1.888	5.3e-05	0.0002974	0.05682	0.4932	0.1594	T	A	intronic	MAN1A2	.	.	1	117475012	5.3e-05	0.0002974	0.05682	0.4932	0.1594	T	A	0.08705	942	0.1407	334	0.05757	608	0.126	500	0.1893	206	0.08163	294	0.03153	222	0.03704	54	0.02976	168	0.1184	76	0.2	20
rs10923314	1	117477442	1.051	1.099	1.692	0.6931	1.888	5.3e-05	0.0002974	0.05682	0.4932	0.1594	G	A	intronic	MAN1A2	.	.	1	117477442	5.3e-05	0.0002974	0.05682	0.4932	0.1594	G	A	0.08705	942	0.1407	334	0.05757	608	0.126	500	0.1893	206	0.08163	294	0.03153	222	0.03704	54	0.02976	168	0.1184	76	0.2	20
rs12131343	1	117479306	1.083	1.09	1.849	0.702	1.858	3.61e-05	0.0003339	0.04534	0.4872	0.166	G	A	intronic	MAN1A2	.	.	1	117479306	3.61e-05	0.0003339	0.04534	0.4872	0.166	G	A	0.08728	928	0.1416	332	0.05705	596	0.1265	498	0.1893	206	0.08219	292	0.03211	218	0.03704	54	0.03049	164	0.1143	70	0.2222	18
rs12078981	1	117479467	1.038	1.083	1.692	0.6931	1.888	6.51e-05	0.0003684	0.05682	0.4932	0.1594	C	T	intronic	MAN1A2	.	.	1	117479467	6.51e-05	0.0003684	0.05682	0.4932	0.1594	C	T	0.08742	938	0.1407	334	0.05795	604	0.127	496	0.1893	206	0.08276	290	0.03153	222	0.03704	54	0.02976	168	0.1184	76	0.2	20
rs61805822	1	117488826	1.049	1.099	1.692	0.6931	1.923	5.46e-05	0.0002974	0.05682	0.4932	0.1521	T	C	intronic	MAN1A2	.	.	1	117488826	5.46e-05	0.0002974	0.05682	0.4932	0.1521	T	C	0.08723	940	0.1407	334	0.05776	606	0.126	500	0.1893	206	0.08163	294	0.03153	222	0.03704	54	0.02976	168	0.1184	76	0.2	20
rs17037333	1	117489535	1.034	1.079	1.692	0.6931	1.923	7.16e-05	0.000401	0.05682	0.4932	0.1521	T	C	intronic	MAN1A2	.	.	1	117489535	7.16e-05	0.000401	0.05682	0.4932	0.1521	T	C	0.08617	940	0.1386	332	0.05757	608	0.124	500	0.1863	204	0.08108	296	0.03153	222	0.03704	54	0.02976	168	0.1184	76	0.2	20
rs17037334	1	117489749	1.091	1.104	1.956	0.7428	1.923	4.47e-05	0.0002823	0.06102	0.4657	0.1521	C	T	intronic	MAN1A2	.	.	1	117489749	4.47e-05	0.0002823	0.06102	0.4657	0.1521	C	T	0.08386	942	0.1377	334	0.05428	608	0.1255	502	0.1893	206	0.08108	296	0.02703	222	0.03704	54	0.02381	168	0.09211	76	0.15	20
rs17037335	1	117490013	1.068	1.073	1.956	0.7428	1.888	6.82e-05	0.0004307	0.06102	0.4657	0.1594	G	A	intronic	MAN1A2	.	.	1	117490013	6.82e-05	0.0004307	0.06102	0.4657	0.1594	G	A	0.08298	940	0.1355	332	0.05428	608	0.1245	498	0.1863	204	0.08163	294	0.02703	222	0.03704	54	0.02381	168	0.09211	76	0.15	20
rs61805824	1	117490171	1.051	1.099	1.692	0.6931	1.888	5.3e-05	0.0002974	0.05682	0.4932	0.1594	T	C	intronic	MAN1A2	.	.	1	117490171	5.3e-05	0.0002974	0.05682	0.4932	0.1594	T	C	0.08705	942	0.1407	334	0.05757	608	0.126	500	0.1893	206	0.08163	294	0.03153	222	0.03704	54	0.02976	168	0.1184	76	0.2	20
rs6673496	1	117491423	1.088	1.099	1.956	0.7428	1.888	4.71e-05	0.0002974	0.06102	0.4657	0.1594	C	G	intronic	MAN1A2	.	.	1	117491423	4.71e-05	0.0002974	0.06102	0.4657	0.1594	C	G	0.08386	942	0.1377	334	0.05428	608	0.126	500	0.1893	206	0.08163	294	0.02703	222	0.03704	54	0.02381	168	0.09211	76	0.15	20
rs10923322	1	117497889	1.054	1.104	1.692	0.6931	1.923	5.02e-05	0.0002823	0.05682	0.4932	0.1521	C	T	intronic	MAN1A2	.	.	1	117497889	5.02e-05	0.0002823	0.05682	0.4932	0.1521	C	T	0.08705	942	0.1407	334	0.05757	608	0.1255	502	0.1893	206	0.08108	296	0.03153	222	0.03704	54	0.02976	168	0.1184	76	0.2	20
rs12121530	1	117498763	1.086	1.099	1.956	0.7428	1.923	4.86e-05	0.0002974	0.06102	0.4657	0.1521	A	C	intronic	MAN1A2	.	.	1	117498763	4.86e-05	0.0002974	0.06102	0.4657	0.1521	A	C	0.08404	940	0.1377	334	0.05446	606	0.126	500	0.1893	206	0.08163	294	0.02703	222	0.03704	54	0.02381	168	0.09211	76	0.15	20
rs12141846	1	117498820	1.054	1.104	1.692	0.6931	1.923	5.02e-05	0.0002823	0.05682	0.4932	0.1521	C	T	intronic	MAN1A2	.	.	1	117498820	5.02e-05	0.0002823	0.05682	0.4932	0.1521	C	T	0.08705	942	0.1407	334	0.05757	608	0.1255	502	0.1893	206	0.08108	296	0.03153	222	0.03704	54	0.02976	168	0.1184	76	0.2	20
rs12091306	1	117499038	1.054	1.104	1.692	0.6931	1.923	5.02e-05	0.0002823	0.05682	0.4932	0.1521	G	A	intronic	MAN1A2	.	.	1	117499038	5.02e-05	0.0002823	0.05682	0.4932	0.1521	G	A	0.08705	942	0.1407	334	0.05757	608	0.1255	502	0.1893	206	0.08108	296	0.03153	222	0.03704	54	0.02976	168	0.1184	76	0.2	20
C1_M13422	1	117502208	1.056	1.104	1.692	0.6931	1.888	4.87e-05	0.0002823	0.05682	0.4932	0.1594	C	CT	intronic	MAN1A2	.	.	1	117502208	4.87e-05	0.0002823	0.05682	0.4932	0.1594	C	CT	0.08686	944	0.1407	334	0.05738	610	0.1255	502	0.1893	206	0.08108	296	0.03153	222	0.03704	54	0.02976	168	0.1184	76	0.2	20
rs17037349	1	117502400	1.049	1.099	1.692	0.6931	1.923	5.46e-05	0.0002974	0.05682	0.4932	0.1521	C	T	intronic	MAN1A2	.	.	1	117502400	5.46e-05	0.0002974	0.05682	0.4932	0.1521	C	T	0.08723	940	0.1407	334	0.05776	606	0.126	500	0.1893	206	0.08163	294	0.03153	222	0.03704	54	0.02976	168	0.1184	76	0.2	20
rs10801961	1	117503454	1.051	1.099	1.692	0.6931	1.888	5.3e-05	0.0002974	0.05682	0.4932	0.1594	G	C	intronic	MAN1A2	.	.	1	117503454	5.3e-05	0.0002974	0.05682	0.4932	0.1594	G	C	0.08705	942	0.1407	334	0.05757	608	0.126	500	0.1893	206	0.08163	294	0.03153	222	0.03704	54	0.02976	168	0.1184	76	0.2	20
rs10801962	1	117503672	1.051	1.099	1.692	0.6931	1.888	5.3e-05	0.0002974	0.05682	0.4932	0.1594	T	A	intronic	MAN1A2	.	.	1	117503672	5.3e-05	0.0002974	0.05682	0.4932	0.1594	T	A	0.08705	942	0.1407	334	0.05757	608	0.126	500	0.1893	206	0.08163	294	0.03153	222	0.03704	54	0.02976	168	0.1184	76	0.2	20
rs75245237	1	117505511	1.051	1.099	1.692	0.6931	1.888	5.3e-05	0.0002974	0.05682	0.4932	0.1594	G	A	intronic	MAN1A2	.	.	1	117505511	5.3e-05	0.0002974	0.05682	0.4932	0.1594	G	A	0.08705	942	0.1407	334	0.05757	608	0.126	500	0.1893	206	0.08163	294	0.03153	222	0.03704	54	0.02976	168	0.1184	76	0.2	20
rs7531617	1	117506274	1.093	1.104	1.956	0.7428	1.888	4.32e-05	0.0002823	0.06102	0.4657	0.1594	G	A	intronic	MAN1A2	.	.	1	117506274	4.32e-05	0.0002823	0.06102	0.4657	0.1594	G	A	0.08369	944	0.1377	334	0.0541	610	0.1255	502	0.1893	206	0.08108	296	0.02703	222	0.03704	54	0.02381	168	0.09211	76	0.15	20
rs7531715	1	117506315	1.093	1.104	1.956	0.7428	1.888	4.32e-05	0.0002823	0.06102	0.4657	0.1594	G	A	intronic	MAN1A2	.	.	1	117506315	4.32e-05	0.0002823	0.06102	0.4657	0.1594	G	A	0.08369	944	0.1377	334	0.0541	610	0.1255	502	0.1893	206	0.08108	296	0.02703	222	0.03704	54	0.02381	168	0.09211	76	0.15	20
rs7536598	1	117506563	1.093	1.104	1.956	0.7428	1.888	4.32e-05	0.0002823	0.06102	0.4657	0.1594	C	T	intronic	MAN1A2	.	.	1	117506563	4.32e-05	0.0002823	0.06102	0.4657	0.1594	C	T	0.08369	944	0.1377	334	0.0541	610	0.1255	502	0.1893	206	0.08108	296	0.02703	222	0.03704	54	0.02381	168	0.09211	76	0.15	20
rs10923326	1	117506843	1.093	1.104	1.956	0.7428	1.888	4.32e-05	0.0002823	0.06102	0.4657	0.1594	A	G	intronic	MAN1A2	.	.	1	117506843	4.32e-05	0.0002823	0.06102	0.4657	0.1594	A	G	0.08369	944	0.1377	334	0.0541	610	0.1255	502	0.1893	206	0.08108	296	0.02703	222	0.03704	54	0.02381	168	0.09211	76	0.15	20
rs76199502	1	117509076	1.054	1.104	1.692	0.6931	1.923	5.02e-05	0.0002823	0.05682	0.4932	0.1521	A	G	intronic	MAN1A2	.	.	1	117509076	5.02e-05	0.0002823	0.05682	0.4932	0.1521	A	G	0.08705	942	0.1407	334	0.05757	608	0.1255	502	0.1893	206	0.08108	296	0.03153	222	0.03704	54	0.02976	168	0.1184	76	0.2	20
rs61805826	1	117509622	1.051	1.099	1.692	0.6931	1.888	5.3e-05	0.0002974	0.05682	0.4932	0.1594	T	C	intronic	MAN1A2	.	.	1	117509622	5.3e-05	0.0002974	0.05682	0.4932	0.1594	T	C	0.08705	942	0.1407	334	0.05757	608	0.126	500	0.1893	206	0.08163	294	0.03153	222	0.03704	54	0.02976	168	0.1184	76	0.2	20
rs12128361	1	117509836	1.03	1.074	1.692	0.6931	1.923	7.76e-05	0.000422	0.05682	0.4932	0.1521	G	C	intronic	MAN1A2	.	.	1	117509836	7.76e-05	0.000422	0.05682	0.4932	0.1521	G	C	0.08635	938	0.1386	332	0.05776	606	0.1245	498	0.1863	204	0.08163	294	0.03153	222	0.03704	54	0.02976	168	0.1184	76	0.2	20
rs6660349	1	117512034	1.088	1.099	1.956	0.7428	1.888	4.71e-05	0.0002974	0.06102	0.4657	0.1594	T	G	intronic	MAN1A2	.	.	1	117512034	4.71e-05	0.0002974	0.06102	0.4657	0.1594	T	G	0.08386	942	0.1377	334	0.05428	608	0.126	500	0.1893	206	0.08163	294	0.02703	222	0.03704	54	0.02381	168	0.09211	76	0.15	20
rs11590033	1	117512717	1.051	1.099	1.692	0.6931	1.888	5.3e-05	0.0002974	0.05682	0.4932	0.1594	G	A	intronic	MAN1A2	.	.	1	117512717	5.3e-05	0.0002974	0.05682	0.4932	0.1594	G	A	0.08705	942	0.1407	334	0.05757	608	0.126	500	0.1893	206	0.08163	294	0.03153	222	0.03704	54	0.02976	168	0.1184	76	0.2	20
rs34828761	1	117514208	1.051	1.099	1.692	0.6931	1.888	5.3e-05	0.0002974	0.05682	0.4932	0.1594	C	CA	intronic	MAN1A2	.	.	1	117514208	5.3e-05	0.0002974	0.05682	0.4932	0.1594	C	CA	0.08705	942	0.1407	334	0.05757	608	0.126	500	0.1893	206	0.08163	294	0.03153	222	0.03704	54	0.02976	168	0.1184	76	0.2	20
rs45526845	1	117514641	1.088	1.099	1.956	0.7428	1.888	4.71e-05	0.0002974	0.06102	0.4657	0.1594	T	G	intronic	MAN1A2	.	.	1	117514641	4.71e-05	0.0002974	0.06102	0.4657	0.1594	T	G	0.08386	942	0.1377	334	0.05428	608	0.126	500	0.1893	206	0.08163	294	0.02703	222	0.03704	54	0.02381	168	0.09211	76	0.15	20
rs12117874	1	117515024	1.051	1.099	1.692	0.6931	1.888	5.3e-05	0.0002974	0.05682	0.4932	0.1594	C	T	intronic	MAN1A2	.	.	1	117515024	5.3e-05	0.0002974	0.05682	0.4932	0.1594	C	T	0.08705	942	0.1407	334	0.05757	608	0.126	500	0.1893	206	0.08163	294	0.03153	222	0.03704	54	0.02976	168	0.1184	76	0.2	20
rs12117151	1	117515244	1.091	1.104	1.956	0.7428	1.923	4.47e-05	0.0002823	0.06102	0.4657	0.1521	G	A	intronic	MAN1A2	.	.	1	117515244	4.47e-05	0.0002823	0.06102	0.4657	0.1521	G	A	0.08386	942	0.1377	334	0.05428	608	0.1255	502	0.1893	206	0.08108	296	0.02703	222	0.03704	54	0.02381	168	0.09211	76	0.15	20
rs1934250	1	117516263	1.054	1.099	1.692	0.6931	2.127	5.13e-05	0.0002974	0.05682	0.4932	0.118	G	A	intronic	MAN1A2	.	.	1	117516263	5.13e-05	0.0002974	0.05682	0.4932	0.118	G	A	0.08742	938	0.1416	332	0.05776	606	0.126	500	0.1893	206	0.08163	294	0.03153	222	0.03704	54	0.02976	168	0.1184	76	0.2	20
rs61807764	1	117516741	1.051	1.099	1.692	0.6931	1.888	5.3e-05	0.0002974	0.05682	0.4932	0.1594	A	G	intronic	MAN1A2	.	.	1	117516741	5.3e-05	0.0002974	0.05682	0.4932	0.1594	A	G	0.08705	942	0.1407	334	0.05757	608	0.126	500	0.1893	206	0.08163	294	0.03153	222	0.03704	54	0.02976	168	0.1184	76	0.2	20
rs61807765	1	117517728	1.023	1.062	1.692	0.6931	1.819	8.59e-05	0.0004937	0.05682	0.4932	0.176	A	C	intronic	MAN1A2	.	.	1	117517728	8.59e-05	0.0004937	0.05682	0.4932	0.176	A	C	0.08654	936	0.1386	332	0.05795	604	0.125	496	0.1863	204	0.08219	292	0.03153	222	0.03704	54	0.02976	168	0.1184	76	0.2	20
rs11580284	1	117518850	1.047	1.099	1.65	0.6931	1.888	5.67e-05	0.0002974	0.06443	0.4932	0.1594	A	G	intronic	MAN1A2	.	.	1	117518850	5.67e-05	0.0002974	0.06443	0.4932	0.1594	A	G	0.08723	940	0.1407	334	0.05776	606	0.126	500	0.1893	206	0.08163	294	0.03153	222	0.03704	54	0.02976	168	0.1216	74	0.2	20
rs61807766	1	117521164	1.056	1.104	1.692	0.6931	1.888	4.87e-05	0.0002823	0.05682	0.4932	0.1594	C	T	intronic	MAN1A2	.	.	1	117521164	4.87e-05	0.0002823	0.05682	0.4932	0.1594	C	T	0.08686	944	0.1407	334	0.05738	610	0.1255	502	0.1893	206	0.08108	296	0.03153	222	0.03704	54	0.02976	168	0.1184	76	0.2	20
rs61807768	1	117522048	1.088	1.099	1.956	0.7428	1.888	4.71e-05	0.0002974	0.06102	0.4657	0.1594	A	G	intronic	MAN1A2	.	.	1	117522048	4.71e-05	0.0002974	0.06102	0.4657	0.1594	A	G	0.08386	942	0.1377	334	0.05428	608	0.126	500	0.1893	206	0.08163	294	0.02703	222	0.03704	54	0.02381	168	0.09211	76	0.15	20
rs12120771	1	117523297	1.051	1.099	1.692	0.6931	1.888	5.3e-05	0.0002974	0.05682	0.4932	0.1594	A	T	UTR3	MAN1A2	NM_006699.5:c.*340A>T	.	1	117523297	5.3e-05	0.0002974	0.05682	0.4932	0.1594	A	T	0.08705	942	0.1407	334	0.05757	608	0.126	500	0.1893	206	0.08163	294	0.03153	222	0.03704	54	0.02976	168	0.1184	76	0.2	20
rs1043476	1	117523837	1.093	1.104	1.956	0.7428	1.888	4.32e-05	0.0002823	0.06102	0.4657	0.1594	G	A	UTR3	MAN1A2	NM_006699.5:c.*880G>A	.	1	117523837	4.32e-05	0.0002823	0.06102	0.4657	0.1594	G	A	0.08369	944	0.1377	334	0.0541	610	0.1255	502	0.1893	206	0.08108	296	0.02703	222	0.03704	54	0.02381	168	0.09211	76	0.15	20
rs12126437	1	117525891	1.051	1.099	1.692	0.6931	1.888	5.3e-05	0.0002974	0.05682	0.4932	0.1594	A	G	UTR3	MAN1A2	NM_006699.5:c.*2934A>G	.	1	117525891	5.3e-05	0.0002974	0.05682	0.4932	0.1594	A	G	0.08705	942	0.1407	334	0.05757	608	0.126	500	0.1893	206	0.08163	294	0.03153	222	0.03704	54	0.02976	168	0.1184	76	0.2	20
rs61807770	1	117526465	1.084	1.081	1.956	1.005	1.923	5.35e-05	0.0003779	0.06102	0.3363	0.1521	C	T	UTR3	MAN1A2	NM_006699.5:c.*3508C>T	.	1	117526465	5.35e-05	0.0003779	0.06102	0.3363	0.1521	C	T	0.08476	932	0.1386	332	0.055	600	0.127	496	0.1893	206	0.08276	290	0.02752	218	0.03846	52	0.0241	166	0.09211	76	0.15	20
rs41313292	1	117527291	1.051	1.099	1.692	0.6931	1.888	5.3e-05	0.0002974	0.05682	0.4932	0.1594	T	C	UTR3	MAN1A2	NM_006699.5:c.*4334T>C	.	1	117527291	5.3e-05	0.0002974	0.05682	0.4932	0.1594	T	C	0.08705	942	0.1407	334	0.05757	608	0.126	500	0.1893	206	0.08163	294	0.03153	222	0.03704	54	0.02976	168	0.1184	76	0.2	20
rs12124341	1	117527739	1.051	1.099	1.692	0.6931	1.888	5.3e-05	0.0002974	0.05682	0.4932	0.1594	G	A	UTR3	MAN1A2	NM_006699.5:c.*4782G>A	.	1	117527739	5.3e-05	0.0002974	0.05682	0.4932	0.1594	G	A	0.08705	942	0.1407	334	0.05757	608	0.126	500	0.1893	206	0.08163	294	0.03153	222	0.03704	54	0.02976	168	0.1184	76	0.2	20
rs41306203	1	117528450	1.107	1.125	1.956	0.7428	1.888	3.58e-05	0.0002289	0.06102	0.4657	0.1594	A	C	UTR3	MAN1A2	NM_006699.5:c.*5493A>C	.	1	117528450	3.58e-05	0.0002289	0.06102	0.4657	0.1594	A	C	0.08386	942	0.1386	332	0.0541	610	0.126	500	0.1912	204	0.08108	296	0.02703	222	0.03704	54	0.02381	168	0.09211	76	0.15	20
rs12129796	1	117529382	1.056	1.104	1.692	0.6931	1.888	4.87e-05	0.0002823	0.05682	0.4932	0.1594	T	G	downstream	MAN1A2	dist=512	.	1	117529382	4.87e-05	0.0002823	0.05682	0.4932	0.1594	T	G	0.08686	944	0.1407	334	0.05738	610	0.1255	502	0.1893	206	0.08108	296	0.03153	222	0.03704	54	0.02976	168	0.1184	76	0.2	20
rs12129797	1	117529383	1.056	1.104	1.692	0.6931	1.888	4.87e-05	0.0002823	0.05682	0.4932	0.1594	C	G	downstream	MAN1A2	dist=513	.	1	117529383	4.87e-05	0.0002823	0.05682	0.4932	0.1594	C	G	0.08686	944	0.1407	334	0.05738	610	0.1255	502	0.1893	206	0.08108	296	0.03153	222	0.03704	54	0.02976	168	0.1184	76	0.2	20
rs12127430	1	117530418	1.093	1.104	1.956	0.7428	1.888	4.32e-05	0.0002823	0.06102	0.4657	0.1594	C	A	intergenic	MAN1A2;LOC100996263	dist=1548;dist=66414	.	1	117530418	4.32e-05	0.0002823	0.06102	0.4657	0.1594	C	A	0.08369	944	0.1377	334	0.0541	610	0.1255	502	0.1893	206	0.08108	296	0.02703	222	0.03704	54	0.02381	168	0.09211	76	0.15	20
rs79216509	1	117534678	1.067	1.099	1.692	0.9769	1.888	4.35e-05	0.0002974	0.05682	0.3484	0.1594	T	C	intergenic	MAN1A2;LOC100996263	dist=5808;dist=62154	.	1	117534678	4.35e-05	0.0002974	0.05682	0.3484	0.1594	T	C	0.08723	940	0.1416	332	0.05757	608	0.126	500	0.1893	206	0.08163	294	0.03182	220	0.03846	52	0.02976	168	0.1184	76	0.2	20
rs17037373	1	117534831	1.062	1.099	1.653	0.9769	1.888	4.72e-05	0.0002974	0.05991	0.3484	0.1594	G	A	intergenic	MAN1A2;LOC100996263	dist=5961;dist=62001	.	1	117534831	4.72e-05	0.0002974	0.05991	0.3484	0.1594	G	A	0.08742	938	0.1416	332	0.05776	606	0.126	500	0.1893	206	0.08163	294	0.03182	220	0.03846	52	0.02976	168	0.1216	74	0.2	20
rs12131579	1	117536461	1.051	1.099	1.692	0.6931	1.888	5.3e-05	0.0002974	0.05682	0.4932	0.1594	A	G	intergenic	MAN1A2;LOC100996263	dist=7591;dist=60371	.	1	117536461	5.3e-05	0.0002974	0.05682	0.4932	0.1594	A	G	0.08705	942	0.1407	334	0.05757	608	0.126	500	0.1893	206	0.08163	294	0.03153	222	0.03704	54	0.02976	168	0.1184	76	0.2	20
rs61807775	1	117537790	1.083	1.093	1.956	0.7428	1.888	5.12e-05	0.0003231	0.06102	0.4657	0.1594	G	A	intergenic	MAN1A2;LOC100996263	dist=8920;dist=59042	.	1	117537790	5.12e-05	0.0003231	0.06102	0.4657	0.1594	G	A	0.08404	940	0.1377	334	0.05446	606	0.1265	498	0.1893	206	0.08219	292	0.02703	222	0.03704	54	0.02381	168	0.09211	76	0.15	20
rs12131251	1	117539229	1.051	1.099	1.692	0.6931	1.888	5.3e-05	0.0002974	0.05682	0.4932	0.1594	G	A	intergenic	MAN1A2;LOC100996263	dist=10359;dist=57603	.	1	117539229	5.3e-05	0.0002974	0.05682	0.4932	0.1594	G	A	0.08705	942	0.1407	334	0.05757	608	0.126	500	0.1893	206	0.08163	294	0.03153	222	0.03704	54	0.02976	168	0.1184	76	0.2	20
rs2358936	1	117548165	1.088	1.099	1.956	0.7428	1.888	4.71e-05	0.0002974	0.06102	0.4657	0.1594	T	C	intergenic	MAN1A2;LOC100996263	dist=19295;dist=48667	.	1	117548165	4.71e-05	0.0002974	0.06102	0.4657	0.1594	T	C	0.08386	942	0.1377	334	0.05428	608	0.126	500	0.1893	206	0.08163	294	0.02703	222	0.03704	54	0.02381	168	0.09211	76	0.15	20
rs61807779	1	117548356	1.081	1.09	1.956	0.7428	1.888	5.3e-05	0.0003359	0.06102	0.4657	0.1594	T	A	intergenic	MAN1A2;LOC100996263	dist=19486;dist=48476	.	1	117548356	5.3e-05	0.0003359	0.06102	0.4657	0.1594	T	A	0.08404	940	0.1377	334	0.05446	606	0.1265	498	0.1893	206	0.08219	292	0.02703	222	0.03704	54	0.02381	168	0.09211	76	0.15	20
C1_125116907	1	125116907	-0.8599	-1.018	-1.733	-0.4502	-0.6227	7.64e-05	0.0003378	0.1803	0.3809	0.2507	G	A	intergenic	NONE;NONE	dist=NONE;dist=NONE	.	1	125116907	7.64e-05	0.0003378	0.1803	0.3809	0.2507	G	A	0.207	942	0.1497	334	0.2385	608	0.2151	502	0.1505	206	0.2601	296	0.1847	222	0.1296	54	0.2024	168	0.1447	76	0.05	20
rs10911822	1	172496585	-0.6585	-0.7954	-0.9081	-0.1887	-0.4886	6.71e-05	0.0001137	0.2705	0.6551	0.3417	T	C	intergenic	C1orf105;SUCO	dist=27756;dist=35764	.	1	172496585	6.71e-05	0.0001137	0.2705	0.6551	0.3417	T	C	0.3248	942	0.2485	334	0.3668	608	0.406	500	0.2864	206	0.4898	294	0.2207	222	0.2037	54	0.2262	168	0.2632	76	0.15	20
rs10911823	1	172496652	-0.6645	-0.7914	-0.9081	-0.2319	-0.4886	6.08e-05	0.0001248	0.2705	0.5866	0.3417	C	T	intergenic	C1orf105;SUCO	dist=27823;dist=35697	.	1	172496652	6.08e-05	0.0001248	0.2705	0.5866	0.3417	C	T	0.328	942	0.2515	334	0.3701	608	0.41	500	0.2913	206	0.4932	294	0.2252	222	0.2037	54	0.2321	168	0.2632	76	0.15	20
rs76468672	1	187062603	1.451	-0.3681	1.785	2.469	1.41	0.0006298	0.676	0.2969	5.16e-05	0.2839	G	T	intergenic	PLA2G4A;LINC01036	dist=73622;dist=30239	.	1	187062603	0.0006298	0.676	0.2969	5.16e-05	0.2839	G	T	0.03284	944	0.0509	334	0.02295	610	0.01195	502	0.009709	206	0.01351	296	0.08559	222	0.2222	54	0.04167	168	0.02632	76	0.05	20
rs114720386	1	187064814	1.447	-0.3813	1.785	2.469	1.41	0.0006559	0.6651	0.2969	5.16e-05	0.2839	T	C	intergenic	PLA2G4A;LINC01036	dist=75833;dist=28028	.	1	187064814	0.0006559	0.6651	0.2969	5.16e-05	0.2839	T	C	0.03298	940	0.0509	334	0.0231	606	0.01205	498	0.009709	206	0.0137	292	0.08559	222	0.2222	54	0.04167	168	0.02632	76	0.05	20
rs116691622	1	187065083	1.449	-0.3705	1.785	2.469	1.41	0.0006424	0.674	0.2969	5.16e-05	0.2839	T	G	intergenic	PLA2G4A;LINC01036	dist=76102;dist=27759	.	1	187065083	0.0006424	0.674	0.2969	5.16e-05	0.2839	T	G	0.03291	942	0.0509	334	0.02303	608	0.012	500	0.009709	206	0.01361	294	0.08559	222	0.2222	54	0.04167	168	0.02632	76	0.05	20
rs77862335	1	187067432	1.447	-0.3813	1.785	2.469	1.41	0.0006559	0.6651	0.2969	5.16e-05	0.2839	T	C	intergenic	PLA2G4A;LINC01036	dist=78451;dist=25410	.	1	187067432	0.0006559	0.6651	0.2969	5.16e-05	0.2839	T	C	0.03298	940	0.0509	334	0.0231	606	0.01205	498	0.009709	206	0.0137	292	0.08559	222	0.2222	54	0.04167	168	0.02632	76	0.05	20
rs117517116	1	187079342	1.558	-0.3705	NA	2.469	1.41	0.0003554	0.674	NA	5.16e-05	0.2839	G	A	intergenic	PLA2G4A;LINC01036	dist=90361;dist=13500	.	1	187079342	0.0003554	0.674	NA	5.16e-05	0.2839	G	A	0.03185	942	0.0509	334	0.02138	608	0.012	500	0.009709	206	0.01361	294	0.08559	222	0.2222	54	0.04167	168	0.01316	76	0.05	20
rs78459160	1	187080494	1.354	-0.3705	0.8853	2.469	1.41	0.001114	0.674	0.571	5.16e-05	0.2839	T	C	intergenic	PLA2G4A;LINC01036	dist=91513;dist=12348	.	1	187080494	0.001114	0.674	0.571	5.16e-05	0.2839	T	C	0.03503	942	0.0509	334	0.02632	608	0.012	500	0.009709	206	0.01361	294	0.08559	222	0.2222	54	0.04167	168	0.05263	76	0.05	20
rs77513530	1	187084058	1.441	-0.3705	1.785	2.466	1.393	0.0006906	0.674	0.2969	5.27e-05	0.2876	G	C	intergenic	PLA2G4A;LINC01036	dist=95077;dist=8784	.	1	187084058	0.0006906	0.674	0.2969	5.27e-05	0.2876	G	C	0.03305	938	0.0509	334	0.02318	604	0.012	500	0.009709	206	0.01361	294	0.08636	220	0.2222	54	0.04217	166	0.02632	76	0.05	20
rs6698338	1	211040364	0.2736	0.07367	1.004	2.157	0.09256	0.06793	0.6956	0.1324	5.91e-05	0.833	T	C	intronic	KCNH1	.	.	1	211040364	0.06793	0.6956	0.1324	5.91e-05	0.833	T	C	0.4278	942	0.485	334	0.3964	608	0.444	500	0.4466	206	0.4422	294	0.2432	222	0.4444	54	0.1786	168	0.4474	76	0.5	20
rs351417	1	212276874	0.6268	0.6958	0.8664	0.8375	0.6153	4.94e-05	0.0007638	0.3382	0.03131	0.09126	T	C	ncRNA_intronic	LINC02608	.	.	1	212276874	4.94e-05	0.0007638	0.3382	0.03131	0.09126	T	C	0.3351	940	0.4222	334	0.2871	606	0.36	500	0.4417	206	0.3027	294	0.2727	220	0.3519	54	0.247	166	0.2237	76	0.3	20
C1_M21328	1	212277675	0.6247	0.6958	0.7716	0.8237	0.6153	5.13e-05	0.0007638	0.3676	0.03424	0.09126	C	CTT	ncRNA_intronic	LINC02608	.	.	1	212277675	5.13e-05	0.0007638	0.3676	0.03424	0.09126	C	CTT	0.3355	942	0.4222	334	0.2878	608	0.36	500	0.4417	206	0.3027	294	0.2748	222	0.3519	54	0.25	168	0.2237	76	0.3	20
rs34418065	1	212279570	0.6248	0.6958	0.6288	0.8237	0.6507	5.03e-05	0.0007638	0.4673	0.03424	0.07333	A	AT	ncRNA_intronic	LINC02608	.	rs34418065	1	212279570	5.03e-05	0.0007638	0.4673	0.03424	0.07333	AT	A	0.3355	942	0.4222	334	0.2878	608	0.36	500	0.4417	206	0.3027	294	0.2748	222	0.3519	54	0.25	168	0.2368	76	0.3	20
rs1992643	1	212281682	0.6247	0.6958	0.7716	0.8237	0.6153	5.13e-05	0.0007638	0.3676	0.03424	0.09126	T	C	ncRNA_intronic	LINC02608	.	.	1	212281682	5.13e-05	0.0007638	0.3676	0.03424	0.09126	T	C	0.3365	942	0.4251	334	0.2878	608	0.36	500	0.4417	206	0.3027	294	0.2748	222	0.3519	54	0.25	168	0.2237	76	0.3	20
rs12036130	1	212283372	0.614	0.6958	0.7716	0.734	0.6153	6.93e-05	0.0007638	0.3676	0.05718	0.09126	T	C	ncRNA_intronic	LINC02608	.	.	1	212283372	6.93e-05	0.0007638	0.3676	0.05718	0.09126	T	C	0.3397	942	0.4281	334	0.2911	608	0.36	500	0.4417	206	0.3027	294	0.2883	222	0.3704	54	0.2619	168	0.2237	76	0.3	20
rs351401	1	212290450	0.6358	0.6958	0.6288	0.734	0.7734	4.51e-05	0.0007638	0.4673	0.05718	0.04601	T	A	intronic	PPP2R5A	.	.	1	212290450	4.51e-05	0.0007638	0.4673	0.05718	0.04601	T	A	0.3426	940	0.4311	334	0.2937	606	0.36	500	0.4417	206	0.3027	294	0.2883	222	0.3704	54	0.2619	168	0.2368	76	0.3	20
rs351398	1	212292897	0.6437	0.6958	0.6288	0.7311	0.8866	3.46e-05	0.0007638	0.4673	0.05906	0.02633	G	T	intronic	PPP2R5A	.	.	1	212292897	3.46e-05	0.0007638	0.4673	0.05906	0.02633	G	T	0.3418	942	0.4311	334	0.2928	608	0.36	500	0.4417	206	0.3027	294	0.2883	222	0.3519	54	0.2679	168	0.2368	76	0.3	20
rs11119904	1	212293262	0.6307	0.7088	0.7716	0.6415	0.7734	4.51e-05	0.0005685	0.3676	0.09477	0.04601	C	T	intronic	PPP2R5A	.	.	1	212293262	4.51e-05	0.0005685	0.3676	0.09477	0.04601	C	T	0.3468	940	0.4371	334	0.297	606	0.362	500	0.4466	206	0.3027	294	0.3018	222	0.3704	54	0.2798	168	0.2237	76	0.3	20
rs351393	1	212303177	0.6225	0.6958	0.6288	0.6415	0.7991	5.88e-05	0.0007638	0.4673	0.09477	0.03788	G	A	intronic	PPP2R5A	.	.	1	212303177	5.88e-05	0.0007638	0.4673	0.09477	0.03788	G	A	0.345	942	0.4311	334	0.2977	608	0.36	500	0.4417	206	0.3027	294	0.3018	222	0.3704	54	0.2798	168	0.2368	76	0.3	20
C1_M21336	1	212306347	0.6288	0.6958	0.7716	0.6415	0.7991	4.91e-05	0.0007638	0.3676	0.09477	0.03788	G	GAGA	intronic	PPP2R5A	.	.	1	212306347	4.91e-05	0.0007638	0.3676	0.09477	0.03788	G	GAGA	0.345	942	0.4341	334	0.2961	608	0.36	500	0.4417	206	0.3027	294	0.3018	222	0.3704	54	0.2798	168	0.2237	76	0.3	20
rs351380	1	212309510	0.6383	0.6958	0.8664	0.7311	0.7991	3.8e-05	0.0007638	0.3382	0.05906	0.03788	T	C	intronic	PPP2R5A	.	.	1	212309510	3.8e-05	0.0007638	0.3382	0.05906	0.03788	T	C	0.3418	942	0.4311	334	0.2928	608	0.36	500	0.4417	206	0.3027	294	0.2883	222	0.3519	54	0.2679	168	0.2237	76	0.3	20
rs12035647	1	212313969	0.6362	0.6942	0.7716	0.7311	0.7991	3.94e-05	0.0007911	0.3676	0.05906	0.03788	C	A	intronic	PPP2R5A	.	.	1	212313969	3.94e-05	0.0007911	0.3676	0.05906	0.03788	C	A	0.3411	944	0.4281	334	0.2934	610	0.3606	502	0.4417	206	0.3041	296	0.2883	222	0.3519	54	0.2679	168	0.2237	76	0.3	20
rs7416306	1	212321792	0.6229	0.6888	NA	0.7311	0.7638	8.57e-05	0.001348	NA	0.05906	0.05236	T	C	intronic	PPP2R5A	.	.	1	212321792	8.57e-05	0.001348	NA	0.05906	0.05236	T	C	0.3319	916	0.4141	326	0.2864	590	0.3506	482	0.43	200	0.2943	282	0.2883	222	0.3519	54	0.2679	168	0.2297	74	0.3	20
rs12023488	1	212324856	0.6211	0.6813	0.7716	0.7311	0.7471	5.85e-05	0.0009104	0.3676	0.05906	0.05407	T	C	intronic	PPP2R5A	.	.	1	212324856	5.85e-05	0.0009104	0.3676	0.05906	0.05407	T	C	0.3376	942	0.4222	334	0.2911	608	0.356	500	0.4369	206	0.2993	294	0.2883	222	0.3519	54	0.2679	168	0.2237	76	0.3	20
rs7519959	1	212325310	0.6362	0.6942	0.7716	0.7311	0.7991	3.94e-05	0.0007911	0.3676	0.05906	0.03788	C	T	intronic	PPP2R5A	.	.	1	212325310	3.94e-05	0.0007911	0.3676	0.05906	0.03788	C	T	0.3422	944	0.4311	334	0.2934	610	0.3606	502	0.4417	206	0.3041	296	0.2883	222	0.3519	54	0.2679	168	0.2237	76	0.3	20
rs12024665	1	212326553	0.6009	0.658	1.144	0.4744	0.7198	7.4e-05	0.001162	0.1259	0.192	0.06803	T	C	intronic	PPP2R5A	.	.	1	212326553	7.4e-05	0.001162	0.1259	0.192	0.06803	T	C	0.3782	944	0.4581	334	0.3344	610	0.3785	502	0.4612	206	0.3209	296	0.3108	222	0.3519	54	0.2976	168	0.4342	76	0.45	20
rs4951588	1	212327091	0.5937	0.658	1.144	0.485	0.6478	8.54e-05	0.001162	0.1259	0.1815	0.09155	T	C	intronic	PPP2R5A	.	.	1	212327091	8.54e-05	0.001162	0.1259	0.1815	0.09155	T	C	0.379	942	0.4581	334	0.3355	608	0.3785	502	0.4612	206	0.3209	296	0.3091	220	0.3519	54	0.2952	166	0.4342	76	0.45	20
rs4951589	1	212327351	0.6362	0.6942	0.7716	0.7311	0.7991	3.94e-05	0.0007911	0.3676	0.05906	0.03788	G	A	intronic	PPP2R5A	.	.	1	212327351	3.94e-05	0.0007911	0.3676	0.05906	0.03788	G	A	0.3411	944	0.4281	334	0.2934	610	0.3606	502	0.4417	206	0.3041	296	0.2883	222	0.3519	54	0.2679	168	0.2237	76	0.3	20
rs7521853	1	212330862	0.6392	0.6958	0.7716	0.7311	0.7991	3.63e-05	0.0007638	0.3676	0.05906	0.03788	C	T	intronic	PPP2R5A	.	.	1	212330862	3.63e-05	0.0007638	0.3676	0.05906	0.03788	C	T	0.3408	942	0.4281	334	0.2928	608	0.36	500	0.4417	206	0.3027	294	0.2883	222	0.3519	54	0.2679	168	0.2237	76	0.3	20
rs7415843	1	212336420	0.6329	0.6958	0.6288	0.7311	0.7991	4.36e-05	0.0007638	0.4673	0.05906	0.03788	C	T	intronic	PPP2R5A	.	.	1	212336420	4.36e-05	0.0007638	0.4673	0.05906	0.03788	C	T	0.3429	942	0.4311	334	0.2944	608	0.36	500	0.4417	206	0.3027	294	0.2883	222	0.3519	54	0.2679	168	0.2368	76	0.3	20
rs12033246	1	212339906	0.6392	0.6958	0.7716	0.7311	0.7991	3.63e-05	0.0007638	0.3676	0.05906	0.03788	T	C	intronic	PPP2R5A	.	.	1	212339906	3.63e-05	0.0007638	0.3676	0.05906	0.03788	T	C	0.3418	942	0.4311	334	0.2928	608	0.36	500	0.4417	206	0.3027	294	0.2883	222	0.3519	54	0.2679	168	0.2237	76	0.3	20
rs1774249	1	212342271	0.6263	0.7295	0.3523	0.6924	0.7305	5.67e-05	0.0005269	0.6423	0.08505	0.04786	T	C	exonic	PPP2R5A	.	.	1	212342271	5.67e-05	0.0005269	0.6423	0.08505	0.04786	T	C	0.3291	942	0.4132	334	0.2829	608	0.338	500	0.4223	206	0.2789	294	0.2793	222	0.3333	54	0.2619	168	0.25	76	0.3	20
rs2252044	1	212342903	0.6329	0.6958	0.6288	0.7311	0.7991	4.36e-05	0.0007638	0.4673	0.05906	0.03788	C	A	intronic	PPP2R5A	.	.	1	212342903	4.36e-05	0.0007638	0.4673	0.05906	0.03788	C	A	0.3429	942	0.4311	334	0.2944	608	0.36	500	0.4417	206	0.3027	294	0.2883	222	0.3519	54	0.2679	168	0.2368	76	0.3	20
rs12745506	1	212357638	0.6665	0.7129	0.7716	0.8267	0.793	1.93e-05	0.0006277	0.3676	0.03472	0.03945	A	C	intronic	PPP2R5A	.	.	1	212357638	1.93e-05	0.0006277	0.3676	0.03472	0.03945	A	C	0.3444	932	0.4367	332	0.2933	600	0.3623	494	0.4461	204	0.3034	290	0.2955	220	0.3704	54	0.2711	166	0.2237	76	0.3	20
rs35097333	1	212357639	0.6606	0.7022	0.7716	0.8267	0.793	2.32e-05	0.0007652	0.3676	0.03472	0.03945	T	TA	intronic	PPP2R5A	.	.	1	212357639	2.32e-05	0.0007652	0.3676	0.03472	0.03945	T	TA	0.3452	930	0.4367	332	0.2943	598	0.3638	492	0.4461	204	0.3056	288	0.2955	220	0.3704	54	0.2711	166	0.2237	76	0.3	20
rs6659594	1	212357921	0.65	0.6441	2.232	0.8036	0.6592	2.44e-05	0.001754	0.03519	0.03772	0.08029	T	C	intronic	PPP2R5A	.	.	1	212357921	2.44e-05	0.001754	0.03519	0.03772	0.08029	T	C	0.3625	938	0.4461	334	0.3162	604	0.3669	496	0.4417	206	0.3138	290	0.2973	222	0.3704	54	0.2738	168	0.3816	76	0.45	20
rs10019	1	212361035	0.6483	0.6942	0.7716	0.8384	0.7734	3.01e-05	0.0007911	0.3676	0.03212	0.04601	A	T	UTR3	PPP2R5A	NM_006243.4:c.*265A>T;NM_001199756.2:c.*265A>T	.	1	212361035	3.01e-05	0.0007911	0.3676	0.03212	0.04601	A	T	0.3439	942	0.4341	334	0.2944	608	0.3606	502	0.4417	206	0.3041	296	0.2928	222	0.3704	54	0.2679	168	0.2237	76	0.3	20
rs3767861	1	212364211	0.6341	0.666	0.7716	0.7311	0.8866	4.04e-05	0.001115	0.3676	0.05906	0.02633	A	G	UTR3	PACC1	NM_018252.3:c.*1004T>C;NM_001377479.1:c.*1004T>C;NM_001377480.1:c.*1162T>C;NM_001377478.1:c.*1004T>C	.	1	212364211	4.04e-05	0.001115	0.3676	0.05906	0.02633	A	G	0.3408	942	0.4281	334	0.2928	608	0.362	500	0.4417	206	0.3061	294	0.2883	222	0.3519	54	0.2679	168	0.2237	76	0.3	20
rs3767862	1	212364360	0.6341	0.666	0.7716	0.7311	0.8866	4.04e-05	0.001115	0.3676	0.05906	0.02633	A	G	UTR3	PACC1	NM_018252.3:c.*855T>C;NM_001377479.1:c.*855T>C;NM_001377480.1:c.*1013T>C;NM_001377478.1:c.*855T>C	.	1	212364360	4.04e-05	0.001115	0.3676	0.05906	0.02633	A	G	0.3418	942	0.4311	334	0.2928	608	0.362	500	0.4417	206	0.3061	294	0.2883	222	0.3519	54	0.2679	168	0.2237	76	0.3	20
rs3767863	1	212364365	0.6464	0.6478	2.232	0.6987	0.7351	2.72e-05	0.00161	0.03519	0.06814	0.05872	T	C	UTR3	PACC1	NM_018252.3:c.*850A>G;NM_001377479.1:c.*850A>G;NM_001377480.1:c.*1008A>G;NM_001377478.1:c.*850A>G	.	1	212364365	2.72e-05	0.00161	0.03519	0.06814	0.05872	T	C	0.3609	942	0.4461	334	0.3141	608	0.366	500	0.4417	206	0.3129	294	0.2928	222	0.3519	54	0.2738	168	0.3816	76	0.45	20
rs3099112	1	212369068	0.6564	0.6854	0.6288	0.8384	0.8866	2.58e-05	0.0009244	0.4673	0.03212	0.02633	C	T	intronic	PACC1	.	.	1	212369068	2.58e-05	0.0009244	0.4673	0.03212	0.02633	C	T	0.3426	940	0.4311	334	0.2937	606	0.3614	498	0.4417	206	0.3048	292	0.2928	222	0.3704	54	0.2679	168	0.2368	76	0.3	20
rs1774247	1	212376015	0.6313	0.6468	2.135	0.6987	0.6592	3.88e-05	0.001652	0.03432	0.06814	0.08029	T	C	intronic	PACC1	.	.	1	212376015	3.88e-05	0.001652	0.03432	0.06814	0.08029	T	C	0.3623	944	0.4461	334	0.3164	610	0.3665	502	0.4417	206	0.3142	296	0.2928	222	0.3519	54	0.2738	168	0.3816	76	0.45	20
rs792445	1	212378974	0.6419	0.6613	2.135	0.6987	0.6592	3.09e-05	0.001387	0.03432	0.06814	0.08029	T	C	intronic	PACC1	.	.	1	212378974	3.09e-05	0.001387	0.03432	0.06814	0.08029	T	C	0.3641	942	0.4491	334	0.3174	608	0.37	500	0.4466	206	0.3163	294	0.2928	222	0.3519	54	0.2738	168	0.3816	76	0.45	20
rs17538400	1	223021354	-0.7444	-0.5356	-1.316	-1.847	-0.6693	4.22e-05	0.01805	0.2252	0.004403	0.1249	T	C	intergenic	DISP1;TLR5	dist=15359;dist=88050	.	1	223021354	4.22e-05	0.01805	0.2252	0.004403	0.1249	T	C	0.2643	942	0.1916	334	0.3043	608	0.27	500	0.2136	206	0.3095	294	0.2297	222	0.05556	54	0.2857	168	0.1447	76	0.05	20
rs4653689	1	225836515	-0.6202	-0.9387	-0.9251	-0.1376	-0.471	0.0001506	6.85e-05	0.3509	0.7104	0.201	C	T	intronic	EPHX1	.	.	1	225836515	0.0001506	6.85e-05	0.3509	0.7104	0.201	C	T	0.321	944	0.2455	334	0.3623	610	0.2849	502	0.1893	206	0.3514	296	0.3018	222	0.2593	54	0.3155	168	0.25	76	0.25	20
rs360063	1	225848608	-0.5574	-0.8396	-1.262	0.1091	-0.4937	0.00034	8.65e-05	0.213	0.7618	0.2043	G	A	intronic	TMEM63A	.	.	1	225848608	0.00034	8.65e-05	0.213	0.7618	0.2043	A	G	0.414	942	0.3473	334	0.4507	608	0.428	500	0.3252	206	0.5	294	0.3694	222	0.3704	54	0.369	168	0.2895	76	0.25	20
C1_M22865	1	225861044	-0.5578	-0.8416	-1.262	0.2428	-0.6036	0.0003696	8.54e-05	0.213	0.5064	0.1323	C	CA	intronic	TMEM63A	.	.	1	225861044	0.0003696	8.54e-05	0.213	0.5064	0.1323	C	CA	0.4172	942	0.3533	334	0.4523	608	0.428	500	0.3252	206	0.5	294	0.3694	222	0.3889	54	0.3631	168	0.2895	76	0.25	20
rs360057	1	225886863	-0.54	-0.8604	-1.418	0.07234	-0.3177	0.0008378	9.33e-05	0.1431	0.8522	0.4281	G	T	exonic	LEFTY1	.	.	1	225886863	0.0008378	9.33e-05	0.1431	0.8522	0.4281	G	T	0.3454	938	0.2904	334	0.3758	604	0.371	496	0.2718	206	0.4414	290	0.2793	222	0.2778	54	0.2798	168	0.2632	76	0.25	20
rs4488015	1	242954361	-0.4633	-0.8448	0.04076	0.1932	0.5131	0.005488	9.53e-05	0.949	0.6474	0.3216	A	G	intergenic	PLD5;LINC01347	dist=429664;dist=101953	.	1	242954361	0.005488	9.53e-05	0.949	0.6474	0.3216	A	G	0.293	942	0.2575	334	0.3125	608	0.37	500	0.2767	206	0.4354	294	0.1847	222	0.2037	54	0.1786	168	0.3158	76	0.35	20
rs12756973	1	242954795	-0.4974	-0.8448	-0.2345	0.1568	0.377	0.003117	9.53e-05	0.7326	0.7132	0.4641	G	A	intergenic	PLD5;LINC01347	dist=430098;dist=101519	.	1	242954795	0.003117	9.53e-05	0.7326	0.7132	0.4641	G	A	0.2926	940	0.2545	334	0.3135	606	0.37	500	0.2767	206	0.4354	294	0.1864	220	0.2037	54	0.1807	166	0.2895	76	0.3	20
rs35302264	1	242955526	-0.4972	-0.8506	-0.2345	0.1932	0.377	0.003108	8.58e-05	0.7326	0.6474	0.4641	G	A	intergenic	PLD5;LINC01347	dist=430829;dist=100788	.	1	242955526	0.003108	8.58e-05	0.7326	0.6474	0.4641	G	A	0.2924	944	0.2545	334	0.3131	610	0.3705	502	0.2767	206	0.4358	296	0.1847	222	0.2037	54	0.1786	168	0.2895	76	0.3	20
rs12741729	1	242955940	-0.4878	-0.8665	0.04076	0.1932	0.377	0.003514	6.5e-05	0.949	0.6474	0.4641	T	G	intergenic	PLD5;LINC01347	dist=431243;dist=100374	.	1	242955940	0.003514	6.5e-05	0.949	0.6474	0.4641	T	G	0.293	942	0.2545	334	0.3141	608	0.368	500	0.2718	206	0.4354	294	0.1847	222	0.2037	54	0.1786	168	0.3158	76	0.35	20
rs4437860	1	242963769	0.4304	0.8062	0.2226	0.1156	-0.5554	0.004518	8.36e-05	0.6696	0.742	0.246	G	A	intergenic	PLD5;LINC01347	dist=439072;dist=92545	.	1	242963769	0.004518	8.36e-05	0.6696	0.742	0.246	A	G	0.3769	942	0.4251	334	0.3503	608	0.352	500	0.4515	206	0.2823	294	0.4189	222	0.4259	54	0.4167	168	0.4342	76	0.45	20
rs12740285	1	242967596	-0.5126	-0.8663	-0.3291	0.2239	0.377	0.002333	6.51e-05	0.6329	0.5919	0.4641	A	C	intergenic	PLD5;LINC01347	dist=442899;dist=88718	.	1	242967596	0.002333	6.51e-05	0.6329	0.5919	0.4641	A	C	0.2915	940	0.25	332	0.3141	608	0.3675	498	0.2696	204	0.4354	294	0.1847	222	0.2037	54	0.1786	168	0.3026	76	0.3	20
rs3095117	1	242982451	-0.7139	-1.09	-1.078	0.3572	0.3032	0.00103	7.79e-05	0.2484	0.5856	0.6951	C	A	intergenic	PLD5;LINC01347	dist=457754;dist=73863	.	1	242982451	0.00103	7.79e-05	0.2484	0.5856	0.6951	A	C	0.1966	880	0.1516	310	0.2211	570	0.2467	454	0.1649	188	0.3045	266	0.1111	216	0.1346	52	0.1037	164	0.3571	70	0.25	16
rs2907147	1	242983787	0.4097	0.8714	-0.07257	0.06467	-0.3256	0.009262	7.92e-05	0.8917	0.8549	0.4807	T	A	intergenic	PLD5;LINC01347	dist=459090;dist=72527	.	1	242983787	0.009262	7.92e-05	0.8917	0.8549	0.4807	T	A	0.3564	940	0.3952	334	0.335	606	0.3173	498	0.4078	206	0.2534	292	0.4144	222	0.4074	54	0.4167	168	0.4079	76	0.4	20
rs2907145	1	242983849	0.3996	0.8607	-0.07257	0.03618	-0.3256	0.01126	9.38e-05	0.8917	0.92	0.4807	C	T	intergenic	PLD5;LINC01347	dist=459152;dist=72465	.	1	242983849	0.01126	9.38e-05	0.8917	0.92	0.4807	C	T	0.3564	940	0.3946	332	0.3355	608	0.318	500	0.4078	206	0.2551	294	0.4136	220	0.4038	52	0.4167	168	0.4079	76	0.4	20
rs56388369	1	242984008	0.4859	0.9132	-0.3949	0.07933	-0.4825	0.00195	2.01e-05	0.5463	0.8223	0.2989	A	G	intergenic	PLD5;LINC01347	dist=459311;dist=72306	.	1	242984008	0.00195	2.01e-05	0.5463	0.8223	0.2989	G	A	0.3992	942	0.4461	334	0.3734	608	0.35	500	0.4563	206	0.2755	294	0.4279	222	0.4259	54	0.4286	168	0.3553	76	0.35	20
rs56731510	2	1716770	0.3971	0.8753	-0.04563	0.5514	0.4686	0.01149	9.42e-05	0.9594	0.09631	0.3063	A	G	intronic	PXDN	.	.	2	1716770	0.01149	9.42e-05	0.9594	0.09631	0.3063	A	G	0.3479	940	0.3892	334	0.3251	606	0.3253	498	0.4175	206	0.2603	292	0.4955	222	0.4074	54	0.4762	168	0.1579	76	0.2	20
rs13030516	2	26530947	-0.627	-0.3634	-1.41	-0.8107	1.446	8.34e-05	0.05554	0.1122	0.1092	0.005114	G	C	intronic	OTOF	.	.	2	26530947	8.34e-05	0.05554	0.1122	0.1092	0.005114	G	C	0.3992	942	0.3413	334	0.4309	608	0.468	500	0.4175	206	0.4966	294	0.2207	222	0.1111	54	0.256	168	0.2895	76	0.2	20
rs17320634	2	26536711	-0.6473	-0.4079	-0.5548	-1.223	-1.149	0.0001334	0.04576	0.5624	0.04144	0.01188	T	C	intronic	OTOF	.	.	2	26536711	0.0001334	0.04576	0.5624	0.04144	0.01188	T	C	0.31	942	0.2455	334	0.3454	608	0.338	500	0.2864	206	0.3741	294	0.1937	222	0.07407	54	0.2321	168	0.1842	76	0.15	20
rs13029274	2	28378847	0.08638	-0.3734	-0.008696	2.366	0.1328	0.6436	0.1393	0.9892	6.22e-05	0.8114	C	A	intergenic	BABAM2;FLJ31356	dist=39947;dist=5562	.	2	28378847	0.6436	0.1393	0.9892	6.22e-05	0.8114	A	C	0.1745	940	0.1826	334	0.17	606	0.1827	498	0.1505	206	0.2055	292	0.1261	222	0.2963	54	0.07143	168	0.3289	76	0.3	20
rs6737845	2	33812722	0.5763	0.7416	0.5163	0.3471	0.3806	0.0001044	0.0002621	0.4268	0.3018	0.3463	A	G	ncRNA_intronic	LINC01317	.	.	2	33812722	0.0001044	0.0002621	0.4268	0.3018	0.3463	G	A	0.446	944	0.4701	334	0.4	610	0.4721	502	0.432	206	0.4054	296	0.4775	222	0.463	54	0.4583	168	0.3816	76	0.5	20
rs6741919	2	33813961	-0.612	0.6951	-0.09019	-0.6552	0.3142	7.55e-05	0.0005882	0.8883	0.1314	0.4049	G	C	ncRNA_intronic	LINC01317	.	.	2	33813961	7.55e-05	0.0005882	0.8883	0.1314	0.4049	G	C	0.4554	942	0.3952	334	0.4885	608	0.478	500	0.432	206	0.415	294	0.2793	222	0.1667	54	0.3155	168	0.3158	76	0.3	20
rs62130354	2	33928652	0.5827	0.6262	1.546	0.6701	0.3246	6.54e-05	0.0009186	0.04691	0.06083	0.4442	C	T	ncRNA_intronic	LINC01317	.	.	2	33928652	6.54e-05	0.0009186	0.04691	0.06083	0.4442	C	T	0.4841	944	0.4371	334	0.441	610	0.49	502	0.4272	206	0.4324	296	0.482	222	0.3704	54	0.4821	168	0.4342	76	0.4	20
rs62132763	2	33948549	0.7169	1.057	1.085	1.021	-0.8275	0.0003182	8.86e-05	0.386	0.02877	0.2051	T	C	ncRNA_intronic	LINC01317	.	.	2	33948549	0.0003182	8.86e-05	0.386	0.02877	0.2051	T	C	0.1461	938	0.2036	334	0.1142	604	0.158	500	0.233	206	0.1054	294	0.1697	218	0.2407	54	0.1463	164	0.06579	76	0.15	20
rs10191783	2	33952111	0.6656	1.056	0.8881	0.8311	-0.6958	0.0005348	7.55e-05	0.3537	0.0625	0.2397	C	A	ncRNA_intronic	LINC01317	.	.	2	33952111	0.0005348	7.55e-05	0.3537	0.0625	0.2397	C	A	0.1582	942	0.2126	334	0.1283	608	0.162	500	0.2379	206	0.1088	294	0.1847	222	0.2407	54	0.1667	168	0.1184	76	0.2	20
rs6543788	2	33952180	-0.5986	-0.6289	-1.221	-0.295	-0.776	9.73e-05	0.001151	0.1167	0.521	0.07012	G	A	ncRNA_intronic	LINC01317	.	.	2	33952180	9.73e-05	0.001151	0.1167	0.521	0.07012	A	G	0.3461	942	0.2814	334	0.3816	608	0.402	500	0.3204	206	0.4592	294	0.2072	222	0.1667	54	0.2202	168	0.3289	76	0.15	20
rs62132786	2	33953470	0.6483	1.061	0.8881	0.8311	-0.9586	0.0007497	7.08e-05	0.3537	0.0625	0.1426	A	G	ncRNA_intronic	LINC01317	.	.	2	33953470	0.0007497	7.08e-05	0.3537	0.0625	0.1426	A	G	0.1568	944	0.2096	334	0.1279	610	0.1614	502	0.2379	206	0.1081	296	0.1847	222	0.2407	54	0.1667	168	0.1184	76	0.2	20
rs62132787	2	33953567	0.6645	1.061	0.8881	0.8311	-0.8275	0.0005753	7.08e-05	0.3537	0.0625	0.2051	T	G	ncRNA_intronic	LINC01317	.	.	2	33953567	0.0005753	7.08e-05	0.3537	0.0625	0.2051	T	G	0.1557	944	0.2096	334	0.1262	610	0.1614	502	0.2379	206	0.1081	296	0.1847	222	0.2407	54	0.1667	168	0.1184	76	0.2	20
rs10084318	2	33961236	0.6718	1.061	0.8881	0.8924	-0.9586	0.0004892	7.6e-05	0.3537	0.04092	0.1426	A	G	ncRNA_intronic	LINC01317	.	.	2	33961236	0.0004892	7.6e-05	0.3537	0.04092	0.1426	A	G	0.1582	942	0.2126	334	0.1283	608	0.162	500	0.2379	206	0.1088	294	0.1892	222	0.2593	54	0.1667	168	0.1184	76	0.2	20
rs12617771	2	33961952	0.6794	1.111	0.4949	0.8924	-0.9586	0.0003051	3.79e-05	0.4856	0.04092	0.1426	A	G	ncRNA_intronic	LINC01317	.	.	2	33961952	0.0003051	3.79e-05	0.4856	0.04092	0.1426	A	G	0.1621	944	0.2186	334	0.1311	610	0.1633	502	0.2427	206	0.1081	296	0.1892	222	0.2593	54	0.1667	168	0.1579	76	0.25	20
rs28578795	2	33962522	0.6784	1.06	0.8881	0.9862	-0.9586	0.0004449	7.88e-05	0.3537	0.02765	0.1426	A	G	ncRNA_intronic	LINC01317	.	.	2	33962522	0.0004449	7.88e-05	0.3537	0.02765	0.1426	A	G	0.1585	934	0.2139	332	0.1279	602	0.1646	492	0.2402	204	0.1111	288	0.1847	222	0.2593	54	0.1607	168	0.1184	76	0.2	20
rs10084438	2	33963512	0.6638	1.044	0.8881	0.8924	-0.9586	0.0005786	9.94e-05	0.3537	0.04092	0.1426	C	T	ncRNA_intronic	LINC01317	.	.	2	33963512	0.0005786	9.94e-05	0.3537	0.04092	0.1426	C	T	0.1571	942	0.2108	332	0.1279	610	0.16	500	0.2353	204	0.1081	296	0.1892	222	0.2593	54	0.1667	168	0.1184	76	0.2	20
C2_M4819	2	38417803	0.6876	0.9681	-0.9172	0.06588	0.2999	3.53e-05	2.03e-05	0.2489	0.8801	0.4808	T	TA	intergenic	ATL2;LINC01883	dist=39219;dist=13491	.	2	38417803	3.53e-05	2.03e-05	0.2489	0.8801	0.4808	T	TA	0.2394	944	0.3084	334	0.2016	610	0.247	502	0.3398	206	0.1824	296	0.1351	222	0.1667	54	0.125	168	0.5	76	0.45	20
rs7568053	2	38419704	0.6565	0.9001	-0.6505	0.06588	0.34	7.17e-05	5.21e-05	0.3911	0.8801	0.4181	A	G	intergenic	ATL2;LINC01883	dist=41120;dist=11590	.	2	38419704	7.17e-05	5.21e-05	0.3911	0.8801	0.4181	A	G	0.258	942	0.3293	334	0.2188	608	0.266	500	0.3544	206	0.2041	294	0.1396	222	0.1852	54	0.125	168	0.4605	76	0.4	20
rs4670871	2	38420705	0.7072	0.9709	-0.6558	0.1784	0.3944	6.62e-05	8.34e-05	0.405	0.6797	0.3647	A	G	intergenic	ATL2;LINC01883	dist=42121;dist=10589	.	2	38420705	6.62e-05	8.34e-05	0.405	0.6797	0.3647	A	G	0.2203	944	0.2814	334	0.1869	610	0.2092	502	0.2864	206	0.1554	296	0.1351	222	0.1852	54	0.119	168	0.4605	76	0.4	20
rs6721141	2	38420765	0.6795	0.9469	-0.5573	0.06588	0.34	4.11e-05	2.6e-05	0.4397	0.8801	0.4181	G	C	intergenic	ATL2;LINC01883	dist=42181;dist=10529	.	2	38420765	4.11e-05	2.6e-05	0.4397	0.8801	0.4181	G	C	0.2585	944	0.3323	334	0.218	610	0.2669	502	0.3592	206	0.2027	296	0.1396	222	0.1852	54	0.125	168	0.4605	76	0.4	20
rs6724327	2	38420935	0.701	0.9647	-0.2041	0.3007	0.34	3.12e-05	2.18e-05	0.7717	0.4935	0.4181	A	G	intergenic	ATL2;LINC01883	dist=42351;dist=10359	.	2	38420935	3.12e-05	2.18e-05	0.7717	0.4935	0.4181	A	G	0.2622	942	0.3353	334	0.222	608	0.266	500	0.3592	206	0.2007	294	0.1396	222	0.2037	54	0.119	168	0.4079	76	0.4	20
rs4670872	2	38421070	0.7265	0.9367	0.2548	0.3963	0.3897	1.25e-05	2.3e-05	0.6826	0.3863	0.3497	G	A	intergenic	ATL2;LINC01883	dist=42486;dist=10224	.	2	38421070	1.25e-05	2.3e-05	0.6826	0.3863	0.3497	G	A	0.2564	944	0.3413	334	0.2098	610	0.2729	502	0.3689	206	0.2061	296	0.1351	222	0.2037	54	0.1131	168	0.4474	76	0.5	20
rs13409431	2	47683518	-0.726	-1.503	-1.372	-0.3076	0.1024	0.0005349	9.34e-05	0.1195	0.4247	0.8367	A	G	intergenic	KCNK12;MSH6	dist=112533;dist=99564	.	2	47683518	0.0005349	9.34e-05	0.1195	0.4247	0.8367	A	G	0.1927	934	0.1205	332	0.2326	602	0.122	500	0.04854	206	0.1735	294	0.3	220	0.2692	52	0.3095	168	0.3108	74	0.2	20
rs2046795	2	66156335	-0.4862	-0.8661	0.2796	0.1717	0.3608	0.002697	9.81e-05	0.7092	0.6179	0.5076	C	A	intergenic	SPRED2;MIR4778	dist=723736;dist=201914	.	2	66156335	0.002697	9.81e-05	0.7092	0.6179	0.5076	A	C	0.4074	940	0.3353	334	0.4472	606	0.358	500	0.2621	206	0.4252	294	0.4775	222	0.4815	54	0.4643	168	0.3947	76	0.45	20
rs2583543	2	85175851	0.6425	0.447	0.8574	0.884	1.257	7.72e-05	0.03441	0.1454	0.02465	0.01517	C	A	intronic	TCF7L1	.	.	2	85175851	7.72e-05	0.03441	0.1454	0.02465	0.01517	C	A	0.2924	944	0.3683	334	0.2508	610	0.3327	502	0.3835	206	0.2973	296	0.2523	222	0.3704	54	0.2143	168	0.3816	76	0.45	20
rs2568198	2	85176423	0.698	0.4838	1.503	0.6585	1.71	3.45e-05	0.02178	0.05227	0.09631	0.004259	G	A	intronic	TCF7L1	.	.	2	85176423	3.45e-05	0.02178	0.05227	0.09631	0.004259	G	A	0.2633	942	0.3473	334	0.2171	608	0.328	500	0.3835	206	0.2891	294	0.2117	222	0.2963	54	0.1845	168	0.2105	76	0.35	20
rs2568200	2	85177909	0.6425	0.447	0.8574	0.884	1.257	7.72e-05	0.03441	0.1454	0.02465	0.01517	G	A	intronic	TCF7L1	.	.	2	85177909	7.72e-05	0.03441	0.1454	0.02465	0.01517	G	A	0.2924	944	0.3683	334	0.2508	610	0.3327	502	0.3835	206	0.2973	296	0.2523	222	0.3704	54	0.2143	168	0.3816	76	0.45	20
C2_92064299	2	92064299	-0.9139	-0.8795	-2.817	-1.174	-0.6807	1.6e-05	0.001475	0.1303	0.02072	0.2287	T	C	intergenic	ACTR3BP2;NONE	dist=121829;dist=NONE	.	2	92064299	1.6e-05	0.001475	0.1303	0.02072	0.2287	T	C	0.2436	944	0.1886	334	0.2738	610	0.257	502	0.2039	206	0.2939	296	0.2432	222	0.1481	54	0.2738	168	0.1447	76	0.1	20
rs74447330	2	92064330	-0.8703	-0.8573	-2.817	-1.131	-0.4269	3.39e-05	0.001799	0.1303	0.02258	0.4418	A	T	intergenic	ACTR3BP2;NONE	dist=121860;dist=NONE	.	2	92064330	3.39e-05	0.001799	0.1303	0.02258	0.4418	A	T	0.2495	942	0.1946	334	0.2796	608	0.257	502	0.2039	206	0.2939	296	0.2613	222	0.1667	54	0.2917	168	0.1486	74	0.1	20
rs75082126	2	92064332	-0.8549	-0.8319	-2.817	-1.131	-0.4269	4.64e-05	0.002457	0.1303	0.02258	0.4418	A	T	intergenic	ACTR3BP2;NONE	dist=121862;dist=NONE	.	2	92064332	4.64e-05	0.002457	0.1303	0.02258	0.4418	A	T	0.2484	942	0.1946	334	0.278	608	0.255	502	0.2039	206	0.2905	296	0.2613	222	0.1667	54	0.2917	168	0.1486	74	0.1	20
C2_95939149	2	95939149	-1.161	-1.454	-1.079	-1.398	0.1784	4.23e-05	0.0002571	0.4758	0.02964	0.806	C	T	intronic	ANKRD36C	.	.	2	95939149	4.23e-05	0.0002571	0.4758	0.02964	0.806	C	T	0.431	942	0.3862	334	0.4556	608	0.426	500	0.3738	206	0.4626	294	0.4369	222	0.3704	54	0.4583	168	0.4605	76	0.45	20
C2_95962990	2	95962990	-1.029	-0.9361	-0.8197	-0.3989	-2.447	2.71e-05	0.003422	0.5026	0.4489	0.001553	C	T	intronic	ANKRD36C	.	.	2	95962990	2.71e-05	0.003422	0.5026	0.4489	0.001553	C	T	0.1561	942	0.1018	334	0.1859	608	0.146	500	0.1019	206	0.1769	294	0.1712	222	0.1481	54	0.1786	168	0.1053	76	0.05	20
C2_95962991	2	95962991	-1.029	-0.9361	-0.8197	-0.3989	-2.447	2.71e-05	0.003422	0.5026	0.4489	0.001553	A	G	intronic	ANKRD36C	.	.	2	95962991	2.71e-05	0.003422	0.5026	0.4489	0.001553	A	G	0.1561	942	0.1018	334	0.1859	608	0.146	500	0.1019	206	0.1769	294	0.1712	222	0.1481	54	0.1786	168	0.1053	76	0.05	20
rs67918421	2	104822823	1.208	0.9646	NA	1.124	2.121	3.67e-05	0.004112	NA	0.4002	0.02893	T	G	ncRNA_intronic	PANTR1	.	.	2	104822823	3.67e-05	0.004112	NA	0.4002	0.02893	T	G	0.06794	942	0.1198	334	0.03947	608	0.094	500	0.1408	206	0.06122	294	0.01802	222	0.01852	54	0.01786	168	0.06579	76	0.2	20
C2_109637133	2	109637133	0.9091	0.8875	0.07445	1.234	1.435	2.22e-05	0.001576	0.9409	0.01572	0.02244	G	A	intergenic	SOWAHC;RGPD6	dist=18143;dist=123306	.	2	109637133	2.22e-05	0.001576	0.9409	0.01572	0.02244	G	A	0.1868	942	0.2485	334	0.153	608	0.208	500	0.2621	206	0.1701	294	0.1351	222	0.2222	54	0.1071	168	0.2368	76	0.25	20
rs1837372	2	111058057	0.6077	0.8576	0.5334	0.4556	0.274	0.0001142	7.78e-05	0.5057	0.1896	0.5377	G	T	intronic	ACOXL	.	.	2	111058057	0.0001142	7.78e-05	0.5057	0.1896	0.5377	G	T	0.2845	942	0.3653	334	0.2401	608	0.308	500	0.3981	206	0.2449	294	0.2432	222	0.3148	54	0.2202	168	0.2368	76	0.25	20
C2_113577130	2	113577130	0.4663	1.145	-0.5593	0.695	-1.087	0.02813	9.01e-05	0.5751	0.2147	0.05457	C	G	upstream	FAM138B	dist=252	.	2	113577130	0.02813	9.01e-05	0.5751	0.2147	0.05457	C	G	0.2319	940	0.2575	334	0.2178	606	0.1853	502	0.2573	206	0.1351	296	0.3333	222	0.3704	54	0.3214	168	0.1806	72	0.15	20
C2_131646485	2	131646485	1.101	1.049	15.68	1.67	1.065	6.63e-05	0.002005	0.985	0.04102	0.1468	T	C	ncRNA_intronic	LINC01087	.	.	2	131646485	6.63e-05	0.002005	0.985	0.04102	0.1468	T	C	0.38	942	0.4311	334	0.352	608	0.372	500	0.4175	206	0.3401	294	0.3829	222	0.4444	54	0.3631	168	0.3947	76	0.5	20
rs9287390	2	132204048	-0.982	-1.187	-1.254	-0.5391	-1.286	1.89e-05	0.0001523	0.1786	0.328	0.05819	G	T	intergenic	ANKRD30BL;MIR663B	dist=42096;dist=52918	.	2	132204048	1.89e-05	0.0001523	0.1786	0.328	0.05819	G	T	0.3793	928	0.3262	328	0.4083	600	0.3694	490	0.31	200	0.4103	290	0.3818	220	0.3704	54	0.3855	166	0.3816	76	0.3	20
rs9283447	2	132204064	-0.9753	-1.098	-0.9444	-0.4419	-2.613	9.43e-05	0.0007698	0.3708	0.4743	0.006387	A	G	intergenic	ANKRD30BL;MIR663B	dist=42112;dist=52902	.	2	132204064	9.43e-05	0.0007698	0.3708	0.4743	0.006387	A	G	0.4069	934	0.3614	332	0.4319	602	0.3931	496	0.3431	204	0.4281	292	0.4091	220	0.4074	54	0.4096	166	0.4342	76	0.4	20
C2_132262681	2	132262681	0.9498	1.201	1.882	-0.1245	1.21	8.47e-06	3.45e-05	0.06085	0.8049	0.03366	A	G	intergenic	MIR663B;ZNF806	dist=5601;dist=42111	.	2	132262681	8.47e-06	3.45e-05	0.06085	0.8049	0.03366	A	G	0.1631	944	0.2216	334	0.1311	610	0.1673	502	0.2379	206	0.1182	296	0.1622	222	0.1481	54	0.1667	168	0.1447	76	0.25	20
C2_132267502	2	132267502	-0.8095	-1.171	-0.8935	-0.2594	-0.07613	0.0002356	3.88e-05	0.449	0.6307	0.9114	A	C	intergenic	MIR663B;ZNF806	dist=10422;dist=37290	.	2	132267502	0.0002356	3.88e-05	0.449	0.6307	0.9114	A	C	0.3495	930	0.2982	332	0.3779	598	0.3165	496	0.2476	206	0.3655	290	0.3761	218	0.3704	54	0.378	164	0.3816	76	0.35	20
C2_134222162	2	134222162	-0.8301	-1.412	-0.5465	0.3403	-0.6782	0.001024	9.21e-05	0.5778	0.5121	0.3117	A	G	intronic	MGAT5	.	.	2	134222162	0.001024	9.21e-05	0.5778	0.5121	0.3117	A	G	0.1324	944	0.08383	334	0.159	610	0.1295	502	0.06796	206	0.1723	296	0.1396	222	0.1481	54	0.1369	168	0.1579	76	0.1	20
rs11678009	2	160578744	0.4586	0.8163	-0.7832	0.4872	-0.2958	0.003008	7.28e-05	0.3191	0.2567	0.4352	A	G	intergenic	RBMS1;TANK	dist=84937;dist=558211	.	2	160578744	0.003008	7.28e-05	0.3191	0.2567	0.4352	A	G	0.3057	942	0.3802	334	0.2648	608	0.328	500	0.4272	206	0.2585	294	0.1441	222	0.2037	54	0.125	168	0.2763	76	0.2	20
rs62176000	2	160578949	0.4605	0.8163	-0.7832	0.4705	-0.2958	0.002702	7.28e-05	0.3191	0.2476	0.4352	T	C	intergenic	RBMS1;TANK	dist=85142;dist=558006	.	2	160578949	0.002702	7.28e-05	0.3191	0.2476	0.4352	T	C	0.31	942	0.3832	334	0.2697	608	0.328	500	0.4272	206	0.2585	294	0.1622	222	0.2222	54	0.1429	168	0.2763	76	0.2	20
rs11690354	2	160579209	0.4901	0.8225	-0.5253	0.5966	-0.3042	0.001442	6.35e-05	0.4804	0.1392	0.4207	G	A	intergenic	RBMS1;TANK	dist=85402;dist=557746	.	2	160579209	0.001442	6.35e-05	0.4804	0.1392	0.4207	G	A	0.3132	942	0.3892	334	0.2714	608	0.3267	502	0.4272	206	0.2568	296	0.1667	222	0.2407	54	0.1429	168	0.3158	76	0.25	20
rs4432471	2	160580011	0.5047	0.8163	-0.4218	0.4705	-0.2438	0.001123	7.28e-05	0.5994	0.2476	0.5333	A	C	intergenic	RBMS1;TANK	dist=86204;dist=556944	.	2	160580011	0.001123	7.28e-05	0.5994	0.2476	0.5333	A	C	0.3047	942	0.3862	334	0.2599	608	0.328	500	0.4272	206	0.2585	294	0.1622	222	0.2222	54	0.1429	168	0.2237	76	0.2	20
rs6750818	2	160580707	0.4605	0.8163	-0.7832	0.4705	-0.2958	0.002702	7.28e-05	0.3191	0.2476	0.4352	A	C	intergenic	RBMS1;TANK	dist=86900;dist=556248	.	2	160580707	0.002702	7.28e-05	0.3191	0.2476	0.4352	A	C	0.311	942	0.3862	334	0.2697	608	0.328	500	0.4272	206	0.2585	294	0.1622	222	0.2222	54	0.1429	168	0.2763	76	0.2	20
rs150659108	2	160583112	0.4961	0.8225	-0.4218	0.5637	-0.3655	0.001404	6.35e-05	0.5994	0.1848	0.3452	C	CCTTCTT	intergenic	RBMS1;TANK	dist=89305;dist=553843	.	2	160583112	0.001404	6.35e-05	0.5994	0.1848	0.3452	C	CCTTCTT	0.2987	944	0.3772	334	0.2557	610	0.3267	502	0.4272	206	0.2568	296	0.1577	222	0.2222	54	0.1369	168	0.2237	76	0.2	20
rs7566421	2	160594187	0.5045	0.8064	-0.1489	0.5416	-0.2025	0.001054	8.43e-05	0.8428	0.2044	0.5782	G	A	intergenic	RBMS1;TANK	dist=100380;dist=542768	.	2	160594187	0.001054	8.43e-05	0.8428	0.2044	0.5782	G	A	0.3073	934	0.3855	332	0.2641	602	0.3333	498	0.432	206	0.2637	292	0.1591	220	0.2222	54	0.1386	166	0.2632	76	0.25	20
rs62193923	2	160651996	0.5236	0.8127	-0.1489	0.6749	-0.1541	0.0006625	7.74e-05	0.8428	0.1096	0.6687	C	T	intergenic	RBMS1;TANK	dist=158189;dist=484959	.	2	160651996	0.0006625	7.74e-05	0.8428	0.1096	0.6687	C	T	0.3106	940	0.3952	334	0.264	606	0.3333	498	0.432	206	0.2637	292	0.1667	222	0.2407	54	0.1429	168	0.2632	76	0.25	20
C2_M18508	2	170171733	1.127	0.8313	NA	1.033	2.092	8.25e-05	0.01322	NA	0.2462	0.02869	T	TA	intergenic	UBR3;MYO3B	dist=87604;dist=6414	rs397720573	2	170171733	8.25e-05	0.01322	NA	0.2462	0.02869	T	TA	0.07006	942	0.1168	334	0.04441	608	0.092	500	0.1262	206	0.06803	294	0.03604	222	0.05556	54	0.02976	168	0.06579	76	0.25	20
rs3768777	2	186591394	-0.64	-0.6992	-1.871	-0.1096	-0.79	6.9e-05	0.0008044	0.03503	0.8065	0.04437	G	A	intronic	ITGAV	.	.	2	186591394	6.9e-05	0.0008044	0.03503	0.8065	0.04437	A	G	0.3136	944	0.2335	334	0.3574	610	0.3267	502	0.2379	206	0.3885	296	0.2252	222	0.2037	54	0.2321	168	0.4342	76	0.25	20
rs10174098	2	186628015	-0.611	-0.6409	-1.846	-0.1096	-0.8354	0.0001268	0.002028	0.03421	0.8065	0.03082	A	G	intronic	ITGAV	.	.	2	186628015	0.0001268	0.002028	0.03421	0.8065	0.03082	G	A	0.3163	942	0.2395	334	0.3586	608	0.328	500	0.2476	206	0.3844	294	0.2252	222	0.2037	54	0.2321	168	0.4474	76	0.25	20
rs2357814	2	193598352	-0.4076	-0.8362	NA	-0.2924	0.2662	0.006122	7.78e-05	NA	0.3627	0.4909	A	G	intergenic	PCGEM1;LINC01821	dist=821453;dist=745917	.	2	193598352	0.006122	7.78e-05	NA	0.3627	0.4909	G	A	0.4782	916	0.4152	330	0.4863	586	0.4486	486	0.3465	202	0.4789	284	0.4907	216	0.4259	54	0.4877	162	0.4054	74	0.4	20
rs6743545	2	193602075	-0.3965	-0.811	-0.0001703	-0.3054	0.2181	0.006738	8.57e-05	0.9998	0.3467	0.5772	A	G	intergenic	PCGEM1;LINC01821	dist=825176;dist=742194	.	2	193602075	0.006738	8.57e-05	0.9998	0.3467	0.5772	G	A	0.4861	932	0.4238	328	0.4801	604	0.4598	498	0.3578	204	0.4694	294	0.4817	218	0.4	50	0.494	168	0.4079	76	0.4	20
rs12992300	2	193602443	-0.3984	-0.7984	-0.0001703	-0.307	0.2391	0.006291	8.88e-05	0.9998	0.3419	0.5415	C	G	intergenic	PCGEM1;LINC01821	dist=825544;dist=741826	.	2	193602443	0.006291	8.88e-05	0.9998	0.3419	0.5415	G	C	0.4851	940	0.4217	332	0.4803	608	0.4622	502	0.3592	206	0.4662	296	0.4909	220	0.4259	54	0.488	166	0.4079	76	0.4	20
rs34785896	2	193603090	-0.3905	-0.8049	0.104	-0.3167	0.2391	0.007354	8.6e-05	0.8988	0.3289	0.5415	G	GT	intergenic	PCGEM1;LINC01821	dist=826191;dist=741179	rs34785896	2	193603090	0.007354	8.6e-05	0.8988	0.3289	0.5415	G	GT	0.4851	940	0.4222	334	0.4802	606	0.4558	498	0.3544	206	0.4726	292	0.473	222	0.4074	54	0.494	168	0.3947	76	0.4	20
rs2357869	2	193606414	-0.4151	-0.8175	NA	-0.2873	0.3208	0.00495	8.53e-05	NA	0.3715	0.4222	C	T	intergenic	PCGEM1;LINC01821	dist=829515;dist=737855	.	2	193606414	0.00495	8.53e-05	NA	0.3715	0.4222	T	C	0.4837	922	0.4187	332	0.4797	590	0.4547	486	0.3529	204	0.4716	282	0.4864	220	0.4259	54	0.494	166	0.4079	76	0.4	20
rs35662827	2	193608889	-0.3772	-0.7875	-0.0001703	-0.32	0.2815	0.008619	9.8e-05	0.9998	0.3114	0.4684	G	A	intergenic	PCGEM1;LINC01821	dist=831990;dist=735380	.	2	193608889	0.008619	9.8e-05	0.9998	0.3114	0.4684	A	G	0.4723	940	0.4102	334	0.4934	606	0.446	500	0.3447	206	0.483	294	0.4955	222	0.4259	54	0.4821	168	0.4079	76	0.4	20
rs2357870	2	193614608	-0.3782	-0.7875	-0.0001703	-0.32	0.2917	0.008462	9.8e-05	0.9998	0.3114	0.4536	A	G	intergenic	PCGEM1;LINC01821	dist=837709;dist=729661	.	2	193614608	0.008462	9.8e-05	0.9998	0.3114	0.4536	G	A	0.4724	942	0.4102	334	0.4934	608	0.446	500	0.3447	206	0.483	294	0.4955	222	0.4259	54	0.4821	168	0.4079	76	0.4	20
rs10497743	2	193616820	-0.4101	-0.7895	0.1309	-0.2699	0.2917	0.004898	7.81e-05	0.8743	0.4376	0.4536	G	A	intergenic	PCGEM1;LINC01821	dist=839921;dist=727449	.	2	193616820	0.004898	7.81e-05	0.8743	0.4376	0.4536	A	G	0.4915	938	0.4222	334	0.4702	604	0.4538	498	0.3495	206	0.4726	292	0.4364	220	0.3889	54	0.4518	166	0.4211	76	0.45	20
rs11673933	2	193619231	-0.3763	-0.7875	-0.0001703	-0.32	0.2709	0.008746	9.8e-05	0.9998	0.3114	0.4842	A	G	intergenic	PCGEM1;LINC01821	dist=842332;dist=725038	.	2	193619231	0.008746	9.8e-05	0.9998	0.3114	0.4842	G	A	0.4723	938	0.4102	334	0.4934	604	0.446	500	0.3447	206	0.483	294	0.4955	222	0.4259	54	0.4821	168	0.4079	76	0.4	20
rs28733143	2	193619712	-0.3746	-0.7945	-0.0001703	-0.278	0.1368	0.008958	8.13e-05	0.9998	0.3723	0.7305	A	C	intergenic	PCGEM1;LINC01821	dist=842813;dist=724557	.	2	193619712	0.008958	8.13e-05	0.9998	0.3723	0.7305	C	A	0.4734	940	0.4132	334	0.4934	606	0.4482	502	0.3447	206	0.4797	296	0.482	222	0.4074	54	0.494	168	0.4079	76	0.4	20
C2_208709746	2	208709746	0.9926	1.312	0.1069	0.7558	0.625	9.99e-05	0.0001859	0.9167	0.2049	0.3862	G	A	ncRNA_intronic	LOC101927960	.	.	2	208709746	9.99e-05	0.0001859	0.9167	0.2049	0.3862	G	A	0.08917	942	0.1317	334	0.06579	608	0.09363	502	0.1456	206	0.05743	296	0.08559	222	0.1296	54	0.07143	168	0.1053	76	0.1	20
rs73071391	2	212820786	0.7743	0.8961	-0.3076	0.5739	1.422	6.38e-05	0.003585	0.6839	0.1013	0.01741	G	A	intergenic	LINC01878;MIR4776-1	dist=1523;dist=105471	.	2	212820786	6.38e-05	0.003585	0.6839	0.1013	0.01741	G	A	0.2341	944	0.2754	334	0.2115	610	0.1096	502	0.1553	206	0.0777	296	0.3288	222	0.4259	54	0.2976	168	0.3947	76	0.4	20
rs2253377	2	222218360	1.708	2.201	1.933	NA	1.079	4.04e-05	3.09e-05	0.3311	NA	0.4958	C	T	intronic	PAX3	.	.	2	222218360	4.04e-05	3.09e-05	0.3311	NA	0.4958	T	C	0.03723	940	0.07784	334	0.01485	606	0.058	500	0.1165	206	0.01701	294	0.009009	222	0	54	0.0119	168	0.02632	76	0.05	20
rs6436301	2	222236412	0.9774	1.136	2.79	0.8933	-1.038	0.0001174	0.0001175	0.02196	0.501	0.2653	A	G	intronic	PAX3	.	.	2	222236412	0.0001174	0.0001175	0.02196	0.501	0.2653	G	A	0.09362	940	0.1527	334	0.06106	606	0.138	500	0.2087	206	0.08844	294	0.01364	220	0.01852	54	0.01205	166	0.09211	76	0.25	20
rs6431245	2	234281839	0.601	-0.4552	2.079	0.903	0.238	0.0001182	0.02632	0.02302	0.0133	0.5845	A	G	intergenic	SPP2;LINC01891	dist=204705;dist=162751	.	2	234281839	0.0001182	0.02632	0.02302	0.0133	0.5845	G	A	0.4385	878	0.4623	318	0.3821	560	0.4914	464	0.433	194	0.4667	270	0.3173	208	0.4808	52	0.2628	156	0.4714	70	0.25	20
rs890657	2	234897012	-0.7569	-1.094	0.184	-0.4553	-0.6123	7.85e-05	7.63e-05	0.8695	0.224	0.1789	C	T	intergenic	LINC01173;SH3BP4	dist=179248;dist=55005	.	2	234897012	7.85e-05	7.63e-05	0.8695	0.224	0.1789	T	C	0.2463	942	0.1707	334	0.2878	608	0.228	500	0.1505	206	0.2823	294	0.3694	222	0.2963	54	0.3929	168	0.07895	76	0.1	20
C2_M27188	2	240474098	-0.6015	0.8359	1.219	-0.2978	-0.03173	9.4e-05	6.43e-05	0.08878	0.4186	0.9354	C	CT	intergenic	GPC1;ANKMY1	dist=6022;dist=5324	.	2	240474098	9.4e-05	6.43e-05	0.08878	0.4186	0.9354	C	CT	0.4755	938	0.3982	334	0.4818	604	0.498	496	0.4029	206	0.4276	290	0.3694	222	0.3148	54	0.3869	168	0.3289	76	0.5	20
rs10933607	2	240475081	-0.5862	0.8076	1.164	-0.2978	-0.03173	0.0001354	9.43e-05	0.1145	0.4186	0.9354	C	T	intergenic	GPC1;ANKMY1	dist=7005;dist=4341	.	2	240475081	0.0001354	9.43e-05	0.1145	0.4186	0.9354	C	T	0.4743	934	0.3976	332	0.4834	602	0.5	494	0.4029	206	0.4306	288	0.3694	222	0.3148	54	0.3869	168	0.3243	74	0.5	18
rs13000733	2	240475558	-0.5974	0.8206	1.219	-0.3125	-0.01831	9.89e-05	7.14e-05	0.08878	0.3968	0.9626	G	A	intergenic	GPC1;ANKMY1	dist=7482;dist=3864	.	2	240475558	9.89e-05	7.14e-05	0.08878	0.3968	0.9626	A	G	0.4775	932	0.4036	332	0.4817	600	0.496	496	0.4069	204	0.4281	292	0.367	218	0.3148	54	0.3841	164	0.3289	76	0.5	20
rs7558942	2	241569597	-0.4841	-0.8666	-1.448	-0.4383	0.06686	0.002021	6.66e-05	0.09403	0.2347	0.8678	G	A	intronic	BOK	.	.	2	241569597	0.002021	6.66e-05	0.09403	0.2347	0.8678	A	G	0.4066	942	0.3443	334	0.4408	608	0.426	500	0.3155	206	0.4966	294	0.3108	222	0.2778	54	0.3214	168	0.5	76	0.4	20
rs7598295	2	241569598	-0.5414	-0.8863	-0.1387	-0.4383	0.06686	0.0005851	5e-05	0.8366	0.2347	0.8678	T	C	intronic	BOK	.	.	2	241569598	0.0005851	5e-05	0.8366	0.2347	0.8678	C	T	0.4066	942	0.3383	334	0.4441	608	0.428	500	0.3155	206	0.4932	294	0.3108	222	0.2778	54	0.3214	168	0.4868	76	0.5	20
rs77386624	3	4193241	1.255	1.396	NA	1.681	1.086	5.41e-05	0.001466	NA	0.1288	0.03761	C	T	intergenic	LRRN1;SETMAR	dist=343407;dist=110063	.	3	4193241	5.41e-05	0.001466	NA	0.1288	0.03761	C	T	0.06476	942	0.1145	332	0.0377	610	0.058	500	0.09804	204	0.03041	296	0.02252	222	0.03704	54	0.01786	168	0.01316	76	0.05	20
C3_9993252	3	9993252	0.8528	0.6649	0.5613	1.311	1.226	9.62e-05	0.02127	0.5551	0.01032	0.03393	C	T	ncRNA_intronic	EMC3-AS1	.	.	3	9993252	9.62e-05	0.02127	0.5551	0.01032	0.03393	C	T	0.293	942	0.3524	332	0.2607	610	0.32	500	0.3627	204	0.2905	296	0.2387	222	0.3519	54	0.2024	168	0.3553	76	0.4	20
rs1872392	3	10910202	0.6272	0.7167	0.572	0.7838	-0.2851	5.23e-05	0.0007373	0.3146	0.03515	0.4823	T	C	intronic	SLC6A11	.	.	3	10910202	5.23e-05	0.0007373	0.3146	0.03515	0.4823	C	T	0.4478	938	0.4731	334	0.404	604	0.4016	498	0.4903	206	0.339	292	0.4864	220	0.4074	54	0.4518	166	0.2895	76	0.4	20
rs66709031	3	10911285	0.6074	0.6553	0.572	0.7993	-0.3896	7.23e-05	0.001704	0.3146	0.03101	0.3365	C	T	intronic	SLC6A11	.	.	3	10911285	7.23e-05	0.001704	0.3146	0.03101	0.3365	C	T	0.4289	942	0.494	334	0.3865	608	0.374	500	0.4563	206	0.3163	294	0.482	222	0.4074	54	0.4464	168	0.2895	76	0.4	20
rs2581206	3	10911864	0.6155	0.6553	0.572	0.8324	-0.3896	6.05e-05	0.001704	0.3146	0.02588	0.3365	C	A	intronic	SLC6A11	.	.	3	10911864	6.05e-05	0.001704	0.3146	0.02588	0.3365	C	A	0.4278	942	0.494	334	0.3849	608	0.374	500	0.4563	206	0.3163	294	0.4775	222	0.4074	54	0.4405	168	0.2895	76	0.4	20
rs2581205	3	10912745	0.6081	0.6445	0.572	0.7993	-0.4427	7.22e-05	0.002059	0.3146	0.03101	0.2791	G	A	intronic	SLC6A11	.	.	3	10912745	7.22e-05	0.002059	0.3146	0.03101	0.2791	G	A	0.4287	940	0.494	334	0.3861	606	0.3755	498	0.4563	206	0.3185	292	0.482	222	0.4074	54	0.4464	168	0.2895	76	0.4	20
rs2697166	3	10913453	0.6016	0.6664	0.5145	0.7993	-0.329	8.45e-05	0.001411	0.3764	0.03101	0.4181	C	T	intronic	SLC6A11	.	.	3	10913453	8.45e-05	0.001411	0.3764	0.03101	0.4181	C	T	0.4269	944	0.497	334	0.3852	610	0.3725	502	0.4563	206	0.3142	296	0.482	222	0.4074	54	0.4464	168	0.3026	76	0.4	20
rs11717739	3	18890304	-0.5913	-0.68	-0.5427	-0.612	-0.544	9.62e-05	0.000574	0.4569	0.139	0.1655	G	A	intergenic	SATB1-AS1;KCNH8	dist=360190;dist=258206	.	3	18890304	9.62e-05	0.000574	0.4569	0.139	0.1655	A	G	0.45	940	0.3705	332	0.4934	608	0.492	498	0.402	204	0.4456	294	0.3018	222	0.1852	54	0.3393	168	0.3158	76	0.3	20
rs1461823	3	28697987	0.876	0.727	1.323	1.252	1.532	8.12e-05	0.01102	0.6042	0.003473	0.1605	A	T	ncRNA_intronic	LINC00693	.	.	3	28697987	8.12e-05	0.01102	0.6042	0.003473	0.1605	A	T	0.1168	942	0.1677	334	0.08882	608	0.124	500	0.165	206	0.09524	294	0.1802	222	0.3148	54	0.1369	168	0.02632	76	0.05	20
rs13073578	3	38637873	1.052	1.373	2.228	0.9829	0.5331	5.95e-06	0.0009089	0.04085	0.009408	0.382	G	A	intronic	SCN5A	.	.	3	38637873	5.95e-06	0.0009089	0.04085	0.009408	0.382	G	A	0.1117	940	0.1647	334	0.08251	606	0.06627	498	0.1068	206	0.03767	292	0.1982	222	0.3333	54	0.1548	168	0.1053	76	0.25	20
rs11711484	3	39235410	0.4181	0.7782	0.2839	-0.02735	-0.2401	0.002811	3.18e-05	0.7077	0.9391	0.518	T	C	intergenic	XIRP1;CX3CR1	dist=42815;dist=28084	.	3	39235410	0.002811	3.18e-05	0.7077	0.9391	0.518	C	T	0.4607	942	0.4611	334	0.4178	608	0.496	500	0.3689	206	0.4014	294	0.3333	222	0.3333	54	0.3333	168	0.2368	76	0.3	20
rs4676617	3	39238891	0.4757	0.7931	0.3	0.1064	-0.06409	0.0008319	2.49e-05	0.7057	0.7627	0.8686	A	C	intergenic	XIRP1;CX3CR1	dist=46296;dist=24603	.	3	39238891	0.0008319	2.49e-05	0.7057	0.7627	0.8686	C	A	0.4258	944	0.494	334	0.382	610	0.4442	502	0.4223	206	0.3514	296	0.3333	222	0.3519	54	0.3274	168	0.2763	76	0.35	20
rs4676486	3	39246552	0.4593	0.7959	0.4494	0.04339	-0.06409	0.001192	2.27e-05	0.559	0.9013	0.8686	G	A	intergenic	XIRP1;CX3CR1	dist=53957;dist=16942	.	3	39246552	0.001192	2.27e-05	0.559	0.9013	0.8686	A	G	0.4246	942	0.497	334	0.3816	608	0.444	500	0.4223	206	0.3503	294	0.3243	222	0.3333	54	0.3214	168	0.2632	76	0.35	20
rs1398712	3	39249288	0.4839	0.8036	0.4494	0.1064	0.04273	0.0007531	2.44e-05	0.559	0.7627	0.9133	T	C	intergenic	XIRP1;CX3CR1	dist=56693;dist=14206	.	3	39249288	0.0007531	2.44e-05	0.559	0.7627	0.9133	C	T	0.4289	942	0.491	334	0.3849	608	0.446	500	0.4223	206	0.3537	294	0.3333	222	0.3519	54	0.3274	168	0.2632	76	0.35	20
rs12491692	3	39249800	0.4815	0.7908	0.4494	0.1064	0.04273	0.0007502	2.69e-05	0.559	0.7627	0.9133	G	A	intergenic	XIRP1;CX3CR1	dist=57205;dist=13694	.	3	39249800	0.0007502	2.69e-05	0.559	0.7627	0.9133	A	G	0.4258	944	0.494	334	0.382	610	0.4402	502	0.4272	206	0.348	296	0.3333	222	0.3519	54	0.3274	168	0.2632	76	0.35	20
rs13064555	3	39250895	0.4603	0.7509	0.4494	0.05542	0.1568	0.001343	7.39e-05	0.559	0.8777	0.6891	A	C	intergenic	XIRP1;CX3CR1	dist=58300;dist=12599	.	3	39250895	0.001343	7.39e-05	0.559	0.8777	0.6891	C	A	0.4352	942	0.488	334	0.3931	608	0.454	500	0.4223	206	0.3673	294	0.3378	222	0.3519	54	0.3333	168	0.2632	76	0.35	20
rs11129818	3	39251244	0.4579	0.7936	0.4494	-0.02808	0.04273	0.001429	3.18e-05	0.559	0.9376	0.9133	G	C	intergenic	XIRP1;CX3CR1	dist=58649;dist=12250	.	3	39251244	0.001429	3.18e-05	0.559	0.9376	0.9133	C	G	0.4299	942	0.494	334	0.3882	608	0.448	500	0.4223	206	0.3571	294	0.3333	222	0.3333	54	0.3333	168	0.2632	76	0.35	20
rs6790767	3	39254614	0.439	-0.8173	1.743	0.3356	-0.0593	0.002444	3.24e-05	0.06623	0.3223	0.8825	G	A	intergenic	XIRP1;CX3CR1	dist=62019;dist=8880	.	3	39254614	0.002444	3.24e-05	0.06623	0.3223	0.8825	A	G	0.483	940	0.4428	332	0.4424	608	0.488	498	0.3578	204	0.4218	294	0.4009	222	0.4444	54	0.3869	168	0.2237	76	0.4	20
C3_90528976	3	90528976	1.116	1.302	2.709	0.5117	0.9733	1.36e-05	0.000349	0.02571	0.3374	0.1591	A	T	intergenic	EPHA3;NONE	dist=1046842;dist=NONE	.	3	90528976	1.36e-05	0.000349	0.02571	0.3374	0.1591	A	T	0.09534	944	0.1527	334	0.06393	610	0.09163	502	0.1505	206	0.05068	296	0.1081	222	0.1667	54	0.08929	168	0.07895	76	0.15	20
rs142719093	3	125765173	-0.8505	-0.965	0.4193	-0.6244	-1.432	5.09e-05	0.0005845	0.6753	0.1886	0.0119	G	T	intergenic	OSBPL11;LOC105374312	dist=169676;dist=9541	.	3	125765173	5.09e-05	0.0005845	0.6753	0.1886	0.0119	G	T	0.2945	944	0.2425	334	0.323	610	0.2988	502	0.2427	206	0.3378	296	0.3018	222	0.2593	54	0.3155	168	0.1974	76	0.2	20
rs824094	3	135458000	0.3936	1.032	-1.175	-0.4985	0.4479	0.03113	9.83e-05	0.2531	0.2083	0.461	G	C	intergenic	EPHB1;PPP2R3A	dist=197535;dist=507728	.	3	135458000	0.03113	9.83e-05	0.2531	0.2083	0.461	G	C	0.2006	942	0.2186	334	0.1908	608	0.158	500	0.233	206	0.1054	294	0.3468	222	0.2963	54	0.3631	168	0.1842	76	0.1	20
rs9859300	3	135509957	0.4676	1.064	-1.175	-0.5135	0.6616	0.01193	7.44e-05	0.2531	0.2139	0.2656	C	T	intergenic	EPHB1;PPP2R3A	dist=249492;dist=455771	.	3	135509957	0.01193	7.44e-05	0.2531	0.2139	0.2656	C	T	0.2052	926	0.2287	328	0.1923	598	0.1585	492	0.2353	204	0.1042	288	0.35	220	0.3148	54	0.3614	166	0.1974	76	0.1	20
C3_M21167	3	166324322	-0.5036	-0.8891	-0.005958	-0.5463	0.6857	0.001569	7.65e-05	0.9923	0.1209	0.1386	G	GT	intergenic	BCHE;LOC105374194	dist=486899;dist=574361	rs71302207	3	166324322	0.001569	7.65e-05	0.9923	0.1209	0.1386	G	GT	0.3503	942	0.2844	334	0.3865	608	0.336	500	0.2282	206	0.4116	294	0.3784	222	0.2778	54	0.4107	168	0.2763	76	0.3	20
C3_M21168	3	166324338	-0.5036	-0.8891	-0.005958	-0.5463	0.6857	0.001569	7.65e-05	0.9923	0.1209	0.1386	A	AAATAACCAG	intergenic	BCHE;LOC105374194	dist=486915;dist=574345	rs59999280	3	166324338	0.001569	7.65e-05	0.9923	0.1209	0.1386	A	AAATAACCAG	0.3503	942	0.2844	334	0.3865	608	0.336	500	0.2282	206	0.4116	294	0.3784	222	0.2778	54	0.4107	168	0.2763	76	0.3	20
rs9817187	3	166325800	-0.5036	-0.8891	-0.005958	-0.5463	0.6857	0.001569	7.65e-05	0.9923	0.1209	0.1386	C	T	intergenic	BCHE;LOC105374194	dist=488377;dist=572883	.	3	166325800	0.001569	7.65e-05	0.9923	0.1209	0.1386	T	C	0.3503	942	0.2844	334	0.3865	608	0.336	500	0.2282	206	0.4116	294	0.3784	222	0.2778	54	0.4107	168	0.2763	76	0.3	20
rs9877395	3	166326266	-0.5061	-0.8932	-0.005958	-0.5463	0.6857	0.001495	7.25e-05	0.9923	0.1209	0.1386	C	G	intergenic	BCHE;LOC105374194	dist=488843;dist=572417	.	3	166326266	0.001495	7.25e-05	0.9923	0.1209	0.1386	G	C	0.3506	944	0.2844	334	0.3869	610	0.3367	502	0.2282	206	0.4122	296	0.3784	222	0.2778	54	0.4107	168	0.2763	76	0.3	20
rs6768572	3	166327356	-0.5036	-0.8891	-0.005958	-0.5463	0.6857	0.001569	7.65e-05	0.9923	0.1209	0.1386	C	T	intergenic	BCHE;LOC105374194	dist=489933;dist=571327	.	3	166327356	0.001569	7.65e-05	0.9923	0.1209	0.1386	T	C	0.3503	942	0.2844	334	0.3865	608	0.336	500	0.2282	206	0.4116	294	0.3784	222	0.2778	54	0.4107	168	0.2763	76	0.3	20
rs9854860	3	166327514	-0.5036	-0.8891	-0.005958	-0.5463	0.6857	0.001569	7.65e-05	0.9923	0.1209	0.1386	T	G	intergenic	BCHE;LOC105374194	dist=490091;dist=571169	.	3	166327514	0.001569	7.65e-05	0.9923	0.1209	0.1386	G	T	0.3503	942	0.2844	334	0.3865	608	0.336	500	0.2282	206	0.4116	294	0.3784	222	0.2778	54	0.4107	168	0.2763	76	0.3	20
rs12696241	3	166328756	-0.4983	-0.8887	-0.005958	-0.5463	0.6857	0.001775	8.61e-05	0.9923	0.1209	0.1386	G	A	intergenic	BCHE;LOC105374194	dist=491333;dist=569927	.	3	166328756	0.001775	8.61e-05	0.9923	0.1209	0.1386	A	G	0.3443	944	0.2784	334	0.3803	610	0.3247	502	0.2184	206	0.3986	296	0.3784	222	0.2778	54	0.4107	168	0.2763	76	0.3	20
rs1320151	3	166331338	-0.5203	-0.8932	-0.005958	-0.5564	0.6478	0.001116	7.25e-05	0.9923	0.1113	0.1667	T	C	intergenic	BCHE;LOC105374194	dist=493915;dist=567345	.	3	166331338	0.001116	7.25e-05	0.9923	0.1113	0.1667	C	T	0.3524	942	0.2844	334	0.3898	608	0.3367	502	0.2282	206	0.4122	296	0.3829	222	0.2778	54	0.4167	168	0.2763	76	0.3	20
rs9825444	3	166332158	-0.498	-0.8841	-0.005958	-0.5564	0.6857	0.001729	9.18e-05	0.9923	0.1113	0.1386	A	T	intergenic	BCHE;LOC105374194	dist=494735;dist=566525	.	3	166332158	0.001729	9.18e-05	0.9923	0.1113	0.1386	T	A	0.345	942	0.2784	334	0.3816	608	0.324	500	0.2184	206	0.398	294	0.3829	222	0.2778	54	0.4167	168	0.2763	76	0.3	20
rs2863373	3	166332877	-0.5036	-0.8891	-0.005958	-0.5463	0.6857	0.001569	7.65e-05	0.9923	0.1209	0.1386	G	T	intergenic	BCHE;LOC105374194	dist=495454;dist=565806	.	3	166332877	0.001569	7.65e-05	0.9923	0.1209	0.1386	T	G	0.3503	942	0.2844	334	0.3865	608	0.336	500	0.2282	206	0.4116	294	0.3784	222	0.2778	54	0.4107	168	0.2763	76	0.3	20
rs2863374	3	166333007	-0.5061	-0.8932	-0.005958	-0.5463	0.6857	0.001495	7.25e-05	0.9923	0.1209	0.1386	G	A	intergenic	BCHE;LOC105374194	dist=495584;dist=565676	.	3	166333007	0.001495	7.25e-05	0.9923	0.1209	0.1386	A	G	0.3506	944	0.2844	334	0.3869	610	0.3367	502	0.2282	206	0.4122	296	0.3784	222	0.2778	54	0.4107	168	0.2763	76	0.3	20
rs4346511	3	166333396	-0.5061	-0.8932	-0.005958	-0.5463	0.6857	0.001495	7.25e-05	0.9923	0.1209	0.1386	T	G	intergenic	BCHE;LOC105374194	dist=495973;dist=565287	.	3	166333396	0.001495	7.25e-05	0.9923	0.1209	0.1386	G	T	0.3506	944	0.2844	334	0.3869	610	0.3367	502	0.2282	206	0.4122	296	0.3784	222	0.2778	54	0.4107	168	0.2763	76	0.3	20
rs6771482	3	166334064	-0.5098	-0.8887	-0.005958	-0.5463	0.6478	0.001443	8.61e-05	0.9923	0.1209	0.1667	G	A	intergenic	BCHE;LOC105374194	dist=496641;dist=564619	.	3	166334064	0.001443	8.61e-05	0.9923	0.1209	0.1667	A	G	0.345	942	0.2784	334	0.3816	608	0.3247	502	0.2184	206	0.3986	296	0.3784	222	0.2778	54	0.4107	168	0.2763	76	0.3	20
C3_M21170	3	166334921	-0.5185	-0.8932	-0.005958	-0.5437	0.6223	0.001165	7.25e-05	0.9923	0.1231	0.1796	A	AATG	intergenic	BCHE;LOC105374194	dist=497498;dist=563762	.	3	166334921	0.001165	7.25e-05	0.9923	0.1231	0.1796	AATG	A	0.3511	940	0.2844	334	0.3878	606	0.3367	502	0.2282	206	0.4122	296	0.3727	220	0.2778	54	0.4036	166	0.2763	76	0.3	20
rs4566491	3	166361616	-0.4945	-0.91	-0.08505	-0.4451	0.6857	0.001915	6.3e-05	0.8929	0.1981	0.1386	T	C	intergenic	BCHE;LOC105374194	dist=524193;dist=537067	.	3	166361616	0.001915	6.3e-05	0.8929	0.1981	0.1386	C	T	0.3471	942	0.2814	334	0.3832	608	0.326	500	0.2184	206	0.4014	294	0.3829	222	0.2963	54	0.4107	168	0.2895	76	0.3	20
rs9811475	3	166363663	-0.4945	-0.91	-0.08505	-0.4451	0.6857	0.001915	6.3e-05	0.8929	0.1981	0.1386	A	C	intergenic	BCHE;LOC105374194	dist=526240;dist=535020	.	3	166363663	0.001915	6.3e-05	0.8929	0.1981	0.1386	C	A	0.3471	942	0.2814	334	0.3832	608	0.326	500	0.2184	206	0.4014	294	0.3829	222	0.2963	54	0.4107	168	0.2895	76	0.3	20
rs9831304	3	166363665	-0.4945	-0.91	-0.08505	-0.4451	0.6857	0.001915	6.3e-05	0.8929	0.1981	0.1386	C	T	intergenic	BCHE;LOC105374194	dist=526242;dist=535018	.	3	166363665	0.001915	6.3e-05	0.8929	0.1981	0.1386	T	C	0.3471	942	0.2814	334	0.3832	608	0.326	500	0.2184	206	0.4014	294	0.3829	222	0.2963	54	0.4107	168	0.2895	76	0.3	20
rs35099643	3	166368243	-0.4945	-0.91	-0.08505	-0.4451	0.6857	0.001915	6.3e-05	0.8929	0.1981	0.1386	T	C	intergenic	BCHE;LOC105374194	dist=530820;dist=530440	.	3	166368243	0.001915	6.3e-05	0.8929	0.1981	0.1386	C	T	0.3471	942	0.2814	334	0.3832	608	0.326	500	0.2184	206	0.4014	294	0.3829	222	0.2963	54	0.4107	168	0.2895	76	0.3	20
rs34537382	3	166386768	-0.4987	-0.91	-0.08505	-0.4329	0.6145	0.001836	6.3e-05	0.8929	0.2125	0.1872	T	TA	intergenic	BCHE;LOC105374194	dist=549345;dist=511915	rs34537382	3	166386768	0.001836	6.3e-05	0.8929	0.2125	0.1872	T	TA	0.3465	938	0.2814	334	0.3825	604	0.326	500	0.2184	206	0.4014	294	0.3773	220	0.2963	54	0.4036	166	0.2895	76	0.3	20
rs6445087	3	172759570	-0.6008	-1.001	-0.04923	-0.1531	0.3522	0.001675	8.2e-05	0.9606	0.7459	0.4843	C	G	intronic	ECT2	.	.	3	172759570	0.001675	8.2e-05	0.9606	0.7459	0.4843	G	C	0.2108	944	0.1617	334	0.2377	610	0.241	502	0.1505	206	0.3041	296	0.1802	222	0.1481	54	0.1905	168	0.1711	76	0.2	20
rs10804849	3	172796504	-0.6008	-1.001	-0.04923	-0.1531	0.3522	0.001675	8.2e-05	0.9606	0.7459	0.4843	A	G	intronic	ECT2	.	.	3	172796504	0.001675	8.2e-05	0.9606	0.7459	0.4843	G	A	0.2097	944	0.1587	334	0.2377	610	0.241	502	0.1505	206	0.3041	296	0.1802	222	0.1481	54	0.1905	168	0.1711	76	0.2	20
rs74979305	3	178026783	1.063	0.8523	0.8602	4.595	1.782	4.62e-05	0.004677	0.427	0.00154	0.03921	C	CT	intergenic	LINC02015;LINC01014	dist=127559;dist=392418	rs142843227	3	178026783	4.62e-05	0.004677	0.427	0.00154	0.03921	CT	C	0.09342	942	0.1497	334	0.0625	608	0.1335	502	0.1796	206	0.1014	296	0.02273	220	0.07407	54	0.006024	166	0.07895	76	0.1	20
rs75326417	3	178131423	0.9727	0.9679	1.748	1.086	0.7672	9.27e-05	0.001631	0.3716	0.05704	0.3708	G	T	intergenic	LINC02015;LINC01014	dist=232199;dist=287778	.	3	178131423	9.27e-05	0.001631	0.3716	0.05704	0.3708	G	T	0.08811	942	0.1437	334	0.05757	608	0.118	500	0.1748	206	0.07823	294	0.06757	222	0.1296	54	0.04762	168	0.02632	76	0.05	20
C3_190893678	3	190893678	-0.6543	0.7217	NA	-0.1575	NA	5.23e-05	0.0003663	NA	0.6878	NA	T	TAA	intergenic	SNAR-I;OSTN	dist=15628;dist=305563	.	3	190893678	5.23e-05	0.0003663	NA	0.6878	NA	T	TAA	0.432	882	0.3631	314	0.4701	568	0.4895	474	0.4124	194	0.4214	280	0.3598	214	0.3333	54	0.3688	160	0.4265	68	0.375	16
rs59929685	3	194252110	0.7717	1.245	1.16	0.102	0.6904	3.99e-05	2.13e-05	0.09457	0.7915	0.1471	G	A	ncRNA_intronic	LINC02037	.	.	3	194252110	3.99e-05	2.13e-05	0.09457	0.7915	0.1471	G	A	0.2117	940	0.2545	334	0.1881	606	0.1365	498	0.2136	206	0.08219	292	0.3018	222	0.2963	54	0.3036	168	0.4079	76	0.5	20
rs1965469	3	195590466	0.7359	1.005	0.1766	0.4298	0.4823	0.000205	9.87e-05	0.7978	0.6881	0.2844	A	G	intergenic	APOD;LOC105374297	dist=6526;dist=56169	.	3	195590466	0.000205	9.87e-05	0.7978	0.6881	0.2844	G	A	0.1635	942	0.2216	334	0.1316	608	0.184	500	0.2621	206	0.1293	294	0.04505	222	0.03704	54	0.04762	168	0.2368	76	0.2	20
rs6764777	3	195601250	0.8323	0.9863	-0.1247	0.8261	0.5133	8.91e-05	0.0001364	0.9205	0.4433	0.2779	G	A	intergenic	APOD;LOC105374297	dist=17310;dist=45385	.	3	195601250	8.91e-05	0.0001364	0.9205	0.4433	0.2779	A	G	0.1471	938	0.2096	334	0.1126	604	0.1807	498	0.2573	206	0.1267	292	0.04091	220	0.03704	54	0.04217	166	0.06579	76	0.05	20
rs1815046	3	195615702	0.8005	1.001	-0.1247	-0.5426	0.5133	0.0001315	9.13e-05	0.9205	0.6619	0.2779	G	A	intergenic	APOD;LOC105374297	dist=31762;dist=30933	.	3	195615702	0.0001315	9.13e-05	0.9205	0.6619	0.2779	A	G	0.1476	942	0.2096	334	0.1135	608	0.182	500	0.2621	206	0.1259	294	0.04054	222	0.01852	54	0.04762	168	0.06579	76	0.05	20
rs2448497	3	195654393	0.423	1.068	NA	-0.8333	0.4163	0.02163	8.14e-05	NA	0.07476	0.4706	T	C	intergenic	LOC105374297;SDHAP2	dist=2234;dist=3646	.	3	195654393	0.02163	8.14e-05	NA	0.07476	0.4706	C	T	0.4253	910	0.4625	320	0.4051	590	0.4256	484	0.4897	194	0.369	290	0.3565	216	0.2593	54	0.3889	162	0.4571	70	0.5	20
rs2688577	3	195716617	-0.7023	-1.456	-0.01719	0.6344	-0.4841	0.002287	6.06e-05	0.9842	0.2478	0.3947	A	G	intergenic	MIR570HG;MUC20	dist=4742;dist=4265	.	3	195716617	0.002287	6.06e-05	0.9842	0.2478	0.3947	A	G	0.3875	942	0.3563	334	0.4046	608	0.42	500	0.3592	206	0.4626	294	0.3468	222	0.3889	54	0.3333	168	0.4079	76	0.4	20
rs2688534	3	195719166	-0.6728	-1.568	0.4575	2.558	-0.6273	0.008297	8.45e-05	0.623	0.03219	0.2818	C	T	intergenic	MIR570HG;MUC20	dist=7291;dist=1716	.	3	195719166	0.008297	8.45e-05	0.623	0.03219	0.2818	C	T	0.4258	944	0.3982	334	0.441	610	0.4363	502	0.3835	206	0.473	296	0.4414	222	0.5	54	0.4226	168	0.4605	76	0.5	20
C4_49165962	4	49165962	-0.8406	-0.877	-1.395	-0.3395	-1.616	5.44e-05	0.001685	0.1326	0.4792	0.00955	A	G	intergenic	CWH43;NONE	dist=103884;dist=NONE	.	4	49165962	5.44e-05	0.001685	0.1326	0.4792	0.00955	A	G	0.3157	944	0.2605	334	0.3459	610	0.3147	502	0.2621	206	0.3514	296	0.3063	222	0.2778	54	0.3155	168	0.3289	76	0.2	20
C4_49226281	4	49226281	-0.8825	NA	-2.127	-0.2918	-1.304	8.4e-05	NA	0.1262	0.5459	0.04889	A	G	intergenic	CWH43;NONE	dist=164203;dist=NONE	.	4	49226281	8.4e-05	NA	0.1262	0.5459	0.04889	A	G	0.2924	872	0.2435	308	0.3191	564	0.3206	446	0.2473	182	0.3712	264	0.2453	212	0.2308	52	0.25	160	0.1316	76	0.05	20
C4_M6472	4	49316038	0.6732	0.4457	NA	-1.034	1.482	7.31e-05	0.04303	NA	0.01369	0.003674	T	C	intergenic	CWH43;NONE	dist=253960;dist=NONE	.	4	49316038	7.31e-05	0.04303	NA	0.01369	0.003674	C	T	0.4301	916	0.4877	324	0.3986	592	0.3607	488	0.41	200	0.3264	288	0.4128	218	0.2885	52	0.4518	166	0.3611	72	0.3	20
C4_49554582	4	49554582	-1.11	-1.025	-2.889	-1.027	-1.648	6.51e-07	0.0006	0.01476	0.03828	0.01454	C	G	intergenic	CWH43;NONE	dist=492504;dist=NONE	.	4	49554582	6.51e-07	0.0006	0.01476	0.03828	0.01454	C	G	0.359	936	0.2922	332	0.3957	604	0.3574	498	0.299	204	0.398	294	0.35	220	0.2778	54	0.3735	166	0.3553	76	0.25	20
rs138323868	4	60120196	1.166	0.9414	2.403	0.8634	1.328	2.73e-05	0.09229	0.0633	0.0573	0.04281	G	C	intergenic	LINC02429;MIR548AG1	dist=1073237;dist=802423	.	4	60120196	2.73e-05	0.09229	0.0633	0.0573	0.04281	G	C	0.1021	940	0.1325	332	0.08553	608	0.03187	502	0.04854	206	0.02027	296	0.2364	220	0.3462	52	0.2024	168	0.1974	76	0.4	20
rs6532738	4	98497265	0.668	1.002	-0.5326	0.7532	-0.258	0.0002368	8.44e-05	0.5612	0.06106	0.6379	T	C	intronic	TSPAN5	.	.	4	98497265	0.0002368	8.44e-05	0.5612	0.06106	0.6379	T	C	0.2011	940	0.2635	334	0.1667	606	0.2	500	0.2816	206	0.1429	294	0.2	220	0.2778	54	0.1747	166	0.2105	76	0.2	20
rs142768386	4	98598464	1.302	1.541	NA	1.908	1.826	4.1e-05	7.1e-05	NA	0.115	0.1353	T	C	intronic	TSPAN5	.	.	4	98598464	4.1e-05	7.1e-05	NA	0.115	0.1353	T	C	0.05638	940	0.1048	334	0.0297	606	0.08	500	0.1408	206	0.03741	294	0.02727	220	0.05556	54	0.01807	166	0.03947	76	0	20
rs4342196	4	125583834	0.5878	0.6113	0.6728	0.266	0.8692	6.58e-05	0.001787	0.4329	0.4129	0.03444	C	G	intergenic	MIR2054;NONE	dist=76527;dist=NONE	.	4	125583834	6.58e-05	0.001787	0.4329	0.4129	0.03444	C	G	0.3949	942	0.4731	334	0.352	608	0.3924	502	0.4709	206	0.3378	296	0.4595	222	0.4815	54	0.4405	168	0.3158	76	0.45	20
rs1560330	4	125586562	0.5756	0.6113	0.6728	0.3175	0.7827	8.52e-05	0.001787	0.4329	0.337	0.0497	C	G	intergenic	MIR2054;NONE	dist=79255;dist=NONE	.	4	125586562	8.52e-05	0.001787	0.4329	0.337	0.0497	C	G	0.3951	944	0.4731	334	0.3525	610	0.3924	502	0.4709	206	0.3378	296	0.455	222	0.4815	54	0.4345	168	0.3158	76	0.45	20
rs13103071	4	125588203	0.5689	0.6113	0.6728	0.266	0.7827	9.98e-05	0.001787	0.4329	0.4129	0.0497	G	C	intergenic	MIR2054;NONE	dist=80896;dist=NONE	.	4	125588203	9.98e-05	0.001787	0.4329	0.4129	0.0497	G	C	0.3962	944	0.4731	334	0.3541	610	0.3924	502	0.4709	206	0.3378	296	0.4595	222	0.4815	54	0.4405	168	0.3158	76	0.45	20
rs36019009	4	125596780	0.5763	0.621	0.6728	0.1789	0.8692	9.07e-05	0.001525	0.4329	0.5832	0.03444	A	AG	intergenic	MIR2054;NONE	dist=89473;dist=NONE	rs753910135	4	125596780	9.07e-05	0.001525	0.4329	0.5832	0.03444	A	AG	0.3934	938	0.4701	334	0.351	604	0.3916	498	0.4709	206	0.3356	292	0.455	222	0.5	54	0.4405	168	0.3158	76	0.45	20
rs115778261	4	131710295	-0.8539	-0.84	-1.642	-0.87	-0.932	3.81e-05	0.002303	0.08301	0.07187	0.1084	T	C	intergenic	LINC02479;SNHG27	dist=1322224;dist=54543	.	4	131710295	3.81e-05	0.002303	0.08301	0.07187	0.1084	T	C	0.2807	944	0.2216	334	0.3131	610	0.2629	502	0.2136	206	0.2973	296	0.2973	222	0.2222	54	0.3214	168	0.2763	76	0.15	20
rs78070235	4	157365312	2.019	NA	NA	2.269	NA	8.38e-05	NA	NA	0.0003288	NA	A	G	UTR3	GRIA2	NM_001379000.3:c.*1881A>G;NM_001379001.3:c.*1881A>G;NM_001083620.3:c.*1881A>G;NM_001083619.3:c.*1881A>G;NM_000826.6:c.*1881A>G	.	4	157365312	8.38e-05	NA	NA	0.0003288	NA	A	G	0.02452	938	0.04192	334	0.0149	604	0	500	0	206	0	294	0.09459	222	0.2407	54	0.04762	168	0.01316	76	0	20
rs75395047	4	157367124	2.015	NA	NA	2.266	NA	8.67e-05	NA	NA	0.000334	NA	T	G	intergenic	GRIA2;LINC02433	dist=1050;dist=205366	.	4	157367124	8.67e-05	NA	NA	0.000334	NA	T	G	0.02447	940	0.04192	334	0.01485	606	0	502	0	206	0	296	0.09545	220	0.2407	54	0.04819	166	0.01316	76	0	20
rs13104929	4	162003697	0.8002	0.9091	2.007	0.5903	0.2201	8.25e-05	0.0001401	0.2561	0.304	0.7548	A	G	intronic	FSTL5	.	.	4	162003697	8.25e-05	0.0001401	0.2561	0.304	0.7548	A	G	0.1585	940	0.2305	334	0.1188	606	0.238	500	0.3204	206	0.1803	294	0.07207	222	0.09259	54	0.06548	168	0.02632	76	0.05	20
rs7654366	4	185749185	-0.8636	-0.8125	-0.2838	-2.35	-0.603	6.31e-05	0.001573	0.753	0.02929	0.3156	G	A	intronic	SORBS2	.	.	4	185749185	6.31e-05	0.001573	0.753	0.02929	0.3156	G	A	0.1847	942	0.1287	334	0.2155	608	0.226	500	0.1602	206	0.2721	294	0.1036	222	0.01852	54	0.131	168	0.2368	76	0.2	20
rs62341992	4	188506554	-0.8631	-0.8716	-0.7345	-1.735	-0.7362	7.77e-05	0.002285	0.4112	0.01591	0.1602	G	A	ncRNA_intronic	LINC01060	.	.	4	188506554	7.77e-05	0.002285	0.4112	0.01591	0.1602	G	A	0.4193	942	0.3653	334	0.449	608	0.452	500	0.4029	206	0.4864	294	0.4685	222	0.4259	54	0.4821	168	0.3421	76	0.3	20
rs80253656	4	189280854	-0.8492	-0.9163	-0.441	-1.462	-0.4203	9.86e-05	0.001781	0.6466	0.005704	0.4807	A	G	intergenic	LINC02508;LINC01262	dist=495343;dist=378752	.	4	189280854	9.86e-05	0.001781	0.6466	0.005704	0.4807	A	G	0.3524	942	0.3054	334	0.3783	608	0.356	500	0.3107	206	0.3878	294	0.3288	222	0.2222	54	0.3631	168	0.3816	76	0.35	20
C4_M27946	4	189973091	-0.774	-1.158	-0.005511	0.07108	-0.7262	0.000234	4.64e-05	0.9954	0.8869	0.2212	C	T	intergenic	FRG1;FRG2	dist=9900;dist=51277	.	4	189973091	0.000234	4.64e-05	0.9954	0.8869	0.2212	C	T	0.3217	942	0.2695	334	0.3503	608	0.3048	502	0.2379	206	0.3514	296	0.3378	222	0.3519	54	0.3333	168	0.3158	76	0.25	20
C4_190021210	4	190021210	-1.208	-1.527	NA	-0.7121	-0.6055	8.8e-05	0.0002643	NA	0.3117	0.3698	A	G	intergenic	FRG1;FRG2	dist=58019;dist=3158	.	4	190021210	8.8e-05	0.0002643	NA	0.3117	0.3698	A	G	0.1019	942	0.06287	334	0.1234	608	0.104	500	0.0534	206	0.1395	294	0.09009	222	0.07407	54	0.09524	168	0.07895	76	0	20
C4_190021214	4	190021214	-1.291	-1.61	NA	-0.8623	-0.866	2.67e-05	0.0001217	NA	0.2165	0.1982	T	C	intergenic	FRG1;FRG2	dist=58023;dist=3154	.	4	190021214	2.67e-05	0.0001217	NA	0.2165	0.1982	T	C	0.107	944	0.06287	334	0.1311	610	0.1076	502	0.0534	206	0.1453	296	0.0991	222	0.07407	54	0.1071	168	0.07895	76	0	20
rs73759304	5	18794150	1.333	1.308	1.863	0.3777	1.856	5.73e-06	0.000241	0.06888	0.7645	0.0557	C	T	intergenic	LINC02223;CDH18	dist=863661;dist=677146	.	5	18794150	5.73e-06	0.000241	0.06888	0.7645	0.0557	C	T	0.069	942	0.1228	334	0.03947	608	0.088	500	0.1456	206	0.04762	294	0.01802	222	0.01852	54	0.01786	168	0.1316	76	0.25	20
rs7725802	5	25533972	-0.4691	0.8842	0.9657	0.5277	-0.2333	0.002622	6.26e-05	0.2343	0.1222	0.5583	T	C	intergenic	LINC02211;CDH9	dist=231692;dist=1346625	.	5	25533972	0.002622	6.26e-05	0.2343	0.1222	0.5583	T	C	0.4904	934	0.4428	332	0.4834	602	0.4798	496	0.4265	204	0.4144	292	0.4136	220	0.4815	54	0.3916	166	0.4211	76	0.45	20
rs2115130	5	25534937	-0.4302	0.8929	0.1984	0.5361	-0.1716	0.005075	4.3e-05	0.7918	0.1156	0.6623	A	G	intergenic	LINC02211;CDH9	dist=232657;dist=1345660	.	5	25534937	0.005075	4.3e-05	0.7918	0.1156	0.6623	A	G	0.4798	940	0.4371	334	0.4967	606	0.488	502	0.4175	206	0.4223	296	0.4136	220	0.4815	54	0.3916	166	0.4868	76	0.45	20
rs4146304	5	25535318	-0.4327	0.8974	0.1984	0.5387	-0.2122	0.004688	3.95e-05	0.7918	0.1133	0.5838	T	C	intergenic	LINC02211;CDH9	dist=233038;dist=1345279	.	5	25535318	0.004688	3.95e-05	0.7918	0.1133	0.5838	T	C	0.4788	942	0.4341	334	0.4967	608	0.488	500	0.4175	206	0.4218	294	0.4099	222	0.4815	54	0.3869	168	0.4868	76	0.45	20
C5_M3524	5	25539348	-0.4969	-0.9128	0.5334	0.6074	-0.2231	0.005568	9.58e-05	0.5131	0.1442	0.6963	C	CCA	intergenic	LINC02211;CDH9	dist=237068;dist=1341249	rs34196185	5	25539348	0.005568	9.58e-05	0.5131	0.1442	0.6963	CCA	C	0.2687	938	0.238	332	0.2855	606	0.3306	496	0.25	204	0.387	292	0.2072	222	0.2593	54	0.1905	168	0.2237	76	0.2	20
rs13172608	5	25540337	-0.4595	-0.8671	0.5473	0.6585	-0.6071	0.003392	5.92e-05	0.5205	0.06431	0.1575	T	C	intergenic	LINC02211;CDH9	dist=238057;dist=1340260	.	5	25540337	0.003392	5.92e-05	0.5205	0.06431	0.1575	T	C	0.3921	936	0.3404	332	0.4205	604	0.4116	498	0.3186	204	0.4762	294	0.3773	220	0.463	54	0.3494	166	0.3378	74	0.35	20
rs7719234	5	25545486	-0.5053	0.8329	2.072	0.4308	-0.3389	0.0011	8.22e-05	0.1165	0.2088	0.4124	T	C	intergenic	LINC02211;CDH9	dist=243206;dist=1335111	.	5	25545486	0.0011	8.22e-05	0.1165	0.2088	0.4124	T	C	0.4936	940	0.4401	334	0.4769	606	0.474	500	0.432	206	0.4082	294	0.3874	222	0.4444	54	0.369	168	0.3684	76	0.45	20
rs4701256	5	25548594	-0.4987	0.8389	1.656	0.3921	-0.3389	0.001423	8.31e-05	0.1523	0.2512	0.4124	G	T	intergenic	LINC02211;CDH9	dist=246314;dist=1332003	.	5	25548594	0.001423	8.31e-05	0.1523	0.2512	0.4124	G	T	0.4968	930	0.4458	332	0.4749	598	0.4698	496	0.4369	206	0.4034	290	0.3843	216	0.4423	52	0.3659	164	0.3553	76	0.5	20
C5_M3534	5	25572579	-0.511	-0.9182	0.369	0.2206	-0.1476	0.000878	2.58e-05	0.603	0.5189	0.6966	T	TA	intergenic	LINC02211;CDH9	dist=270299;dist=1308018	rs61163647	5	25572579	0.000878	2.58e-05	0.603	0.5189	0.6966	T	TA	0.4374	942	0.3743	334	0.472	608	0.452	500	0.3495	206	0.4762	294	0.3604	222	0.3704	54	0.3571	168	0.4868	76	0.45	20
rs6452266	5	25572612	-0.5253	-0.8913	0.7688	0.193	-0.1762	0.0007408	4.4e-05	0.3281	0.5701	0.6556	C	A	intergenic	LINC02211;CDH9	dist=270332;dist=1307985	.	5	25572612	0.0007408	4.4e-05	0.3281	0.5701	0.6556	C	A	0.4416	942	0.3772	334	0.477	608	0.454	500	0.3544	206	0.4762	294	0.3604	222	0.3704	54	0.3571	168	0.4474	76	0.45	20
rs6452267	5	25572613	-0.5253	-0.8913	0.7688	0.193	-0.1762	0.0007408	4.4e-05	0.3281	0.5701	0.6556	A	C	intergenic	LINC02211;CDH9	dist=270333;dist=1307984	.	5	25572613	0.0007408	4.4e-05	0.3281	0.5701	0.6556	A	C	0.4416	942	0.3772	334	0.477	608	0.454	500	0.3544	206	0.4762	294	0.3604	222	0.3704	54	0.3571	168	0.4474	76	0.45	20
rs13183613	5	25572828	-0.5229	-1.003	-0.1807	-0.01407	0.6393	0.002105	1.5e-05	0.7753	0.9757	0.1671	A	T	intergenic	LINC02211;CDH9	dist=270548;dist=1307769	.	5	25572828	0.002105	1.5e-05	0.7753	0.9757	0.1671	A	T	0.3142	942	0.2725	334	0.3372	608	0.38	500	0.2816	206	0.449	294	0.1982	222	0.1852	54	0.2024	168	0.3816	76	0.3	20
rs1542563	5	25572887	-0.5442	0.9952	0.4467	0.3156	-0.178	0.0004069	3.98e-06	0.534	0.3604	0.6533	C	T	intergenic	LINC02211;CDH9	dist=270607;dist=1307710	.	5	25572887	0.0004069	3.98e-06	0.534	0.3604	0.6533	C	T	0.4862	942	0.4222	334	0.4786	608	0.474	500	0.4126	206	0.3946	294	0.3784	222	0.4074	54	0.369	168	0.4211	76	0.45	20
rs11952581	5	25573061	-0.6159	-1.06	0.4292	0.2428	-0.3176	7.33e-05	1.67e-06	0.5366	0.469	0.4215	G	A	intergenic	LINC02211;CDH9	dist=270781;dist=1307536	.	5	25573061	7.33e-05	1.67e-06	0.5366	0.469	0.4215	G	A	0.4172	942	0.3383	334	0.4605	608	0.424	500	0.3058	206	0.4932	294	0.3514	222	0.3704	54	0.3452	168	0.4868	76	0.4	20
rs11953292	5	25573081	-0.6021	-0.9549	-0.1886	0.2634	-0.5472	0.0001872	1.55e-05	0.8706	0.4293	0.1951	C	T	intergenic	LINC02211;CDH9	dist=270801;dist=1307516	.	5	25573081	0.0001872	1.55e-05	0.8706	0.4293	0.1951	C	T	0.3429	942	0.2725	334	0.3816	608	0.358	500	0.2524	206	0.432	294	0.3333	222	0.3519	54	0.3274	168	0.1711	76	0.15	20
rs11952604	5	25573100	-0.6046	-1.065	0.2783	0.2428	-0.3176	0.0001017	1.53e-06	0.696	0.469	0.4215	G	A	intergenic	LINC02211;CDH9	dist=270820;dist=1307497	.	5	25573100	0.0001017	1.53e-06	0.696	0.469	0.4215	G	A	0.4183	942	0.3404	332	0.4607	610	0.4243	502	0.3058	206	0.4932	296	0.3514	222	0.3704	54	0.3452	168	0.473	74	0.4444	18
rs11955550	5	25573124	-0.6154	-1.065	0.4292	0.2695	-0.3176	7.77e-05	1.53e-06	0.5366	0.4259	0.4215	A	G	intergenic	LINC02211;CDH9	dist=270844;dist=1307473	.	5	25573124	7.77e-05	1.53e-06	0.5366	0.4259	0.4215	A	G	0.4163	944	0.3383	334	0.459	610	0.4243	502	0.3058	206	0.4932	296	0.3468	222	0.3704	54	0.3393	168	0.4868	76	0.4	20
C5_M3535	5	25573170	-0.6267	-1.065	0.4292	0.2428	-0.3781	5.77e-05	1.53e-06	0.5366	0.469	0.3503	A	ATCTTTT	intergenic	LINC02211;CDH9	dist=270890;dist=1307427	.	5	25573170	5.77e-05	1.53e-06	0.5366	0.469	0.3503	A	ATCTTTT	0.4184	944	0.3383	334	0.4623	610	0.4243	502	0.3058	206	0.4932	296	0.3514	222	0.3704	54	0.3452	168	0.4868	76	0.4	20
rs11953375	5	25573360	-0.5646	-0.9608	-0.1886	0.3842	-0.5123	0.0004459	1.4e-05	0.8706	0.2494	0.2308	A	T	intergenic	LINC02211;CDH9	dist=271080;dist=1307237	.	5	25573360	0.0004459	1.4e-05	0.8706	0.2494	0.2308	A	T	0.3408	942	0.2754	334	0.3766	608	0.3586	502	0.2524	206	0.4324	296	0.3288	222	0.3704	54	0.3155	168	0.1711	76	0.15	20
rs10068429	5	25573739	-0.5959	-1.065	0.4292	0.3477	-0.3781	0.0001226	1.53e-06	0.5366	0.2947	0.3503	A	G	intergenic	LINC02211;CDH9	dist=271459;dist=1306858	.	5	25573739	0.0001226	1.53e-06	0.5366	0.2947	0.3503	A	G	0.4174	944	0.3413	334	0.459	610	0.4243	502	0.3058	206	0.4932	296	0.3468	222	0.3889	54	0.3333	168	0.4868	76	0.4	20
rs10061502	5	25573746	-0.5959	-1.065	0.4292	0.3477	-0.3781	0.0001226	1.53e-06	0.5366	0.2947	0.3503	G	A	intergenic	LINC02211;CDH9	dist=271466;dist=1306851	.	5	25573746	0.0001226	1.53e-06	0.5366	0.2947	0.3503	G	A	0.4174	944	0.3413	334	0.459	610	0.4243	502	0.3058	206	0.4932	296	0.3468	222	0.3889	54	0.3333	168	0.4868	76	0.4	20
rs10063115	5	25573879	-0.575	-1.054	0.3368	0.3477	-0.3098	0.0002109	2.09e-06	0.6374	0.2947	0.4345	G	A	intergenic	LINC02211;CDH9	dist=271599;dist=1306718	.	5	25573879	0.0002109	2.09e-06	0.6374	0.2947	0.4345	G	A	0.4138	940	0.3413	334	0.4538	606	0.422	500	0.3058	206	0.4966	294	0.3468	222	0.3889	54	0.3333	168	0.5	76	0.4	20
rs10055266	5	25573880	-0.575	-1.06	0.3368	0.3477	-0.2757	0.0002096	1.67e-06	0.6374	0.2947	0.4902	T	C	intergenic	LINC02211;CDH9	dist=271600;dist=1306717	.	5	25573880	0.0002096	1.67e-06	0.6374	0.2947	0.4902	T	C	0.4138	940	0.3413	334	0.4538	606	0.424	500	0.3058	206	0.4932	294	0.3468	222	0.3889	54	0.3333	168	0.5	76	0.4	20
rs10070120	5	25574061	-0.5875	-1.065	0.4292	0.3477	-0.3176	0.0001471	1.53e-06	0.5366	0.2947	0.4215	C	G	intergenic	LINC02211;CDH9	dist=271781;dist=1306536	.	5	25574061	0.0001471	1.53e-06	0.5366	0.2947	0.4215	C	G	0.4163	944	0.3413	334	0.4574	610	0.4243	502	0.3058	206	0.4932	296	0.3468	222	0.3889	54	0.3333	168	0.4868	76	0.4	20
rs10064817	5	25574084	-0.5875	-1.065	0.4292	0.3477	-0.3176	0.0001471	1.53e-06	0.5366	0.2947	0.4215	C	T	intergenic	LINC02211;CDH9	dist=271804;dist=1306513	.	5	25574084	0.0001471	1.53e-06	0.5366	0.2947	0.4215	C	T	0.4163	944	0.3413	334	0.4574	610	0.4243	502	0.3058	206	0.4932	296	0.3468	222	0.3889	54	0.3333	168	0.4868	76	0.4	20
rs10063295	5	25574096	-0.5875	-1.065	0.4292	0.3477	-0.3176	0.0001471	1.53e-06	0.5366	0.2947	0.4215	G	A	intergenic	LINC02211;CDH9	dist=271816;dist=1306501	.	5	25574096	0.0001471	1.53e-06	0.5366	0.2947	0.4215	G	A	0.4163	944	0.3413	334	0.4574	610	0.4243	502	0.3058	206	0.4932	296	0.3468	222	0.3889	54	0.3333	168	0.4868	76	0.4	20
rs12517865	5	25574274	-0.7133	-1.114	0.9617	0.2187	-0.4569	0.0002478	3.26e-05	0.3372	0.6523	0.2707	G	A	intergenic	LINC02211;CDH9	dist=271994;dist=1306323	.	5	25574274	0.0002478	3.26e-05	0.3372	0.6523	0.2707	G	A	0.2102	942	0.1557	334	0.2401	608	0.2271	502	0.1359	206	0.2905	296	0.1441	222	0.1481	54	0.1429	168	0.1316	76	0.15	20
rs7722588	5	25574429	-0.5875	-1.065	0.4292	0.3477	-0.3176	0.0001471	1.53e-06	0.5366	0.2947	0.4215	A	G	intergenic	LINC02211;CDH9	dist=272149;dist=1306168	.	5	25574429	0.0001471	1.53e-06	0.5366	0.2947	0.4215	A	G	0.4163	944	0.3413	334	0.4574	610	0.4243	502	0.3058	206	0.4932	296	0.3468	222	0.3889	54	0.3333	168	0.4868	76	0.4	20
rs7723823	5	25574471	-0.5875	-1.065	0.4292	0.3477	-0.3176	0.0001471	1.53e-06	0.5366	0.2947	0.4215	T	C	intergenic	LINC02211;CDH9	dist=272191;dist=1306126	.	5	25574471	0.0001471	1.53e-06	0.5366	0.2947	0.4215	T	C	0.4163	944	0.3413	334	0.4574	610	0.4243	502	0.3058	206	0.4932	296	0.3468	222	0.3889	54	0.3333	168	0.4868	76	0.4	20
rs7705564	5	25574478	-0.5875	-1.065	0.4292	0.3477	-0.3176	0.0001471	1.53e-06	0.5366	0.2947	0.4215	C	A	intergenic	LINC02211;CDH9	dist=272198;dist=1306119	.	5	25574478	0.0001471	1.53e-06	0.5366	0.2947	0.4215	C	A	0.4163	944	0.3413	334	0.4574	610	0.4243	502	0.3058	206	0.4932	296	0.3468	222	0.3889	54	0.3333	168	0.4868	76	0.4	20
rs7709771	5	25574518	-0.5875	-1.065	0.4292	0.3477	-0.3176	0.0001471	1.53e-06	0.5366	0.2947	0.4215	G	T	intergenic	LINC02211;CDH9	dist=272238;dist=1306079	.	5	25574518	0.0001471	1.53e-06	0.5366	0.2947	0.4215	G	T	0.4163	944	0.3413	334	0.4574	610	0.4243	502	0.3058	206	0.4932	296	0.3468	222	0.3889	54	0.3333	168	0.4868	76	0.4	20
rs10063646	5	25574760	-0.5853	-1.06	0.4292	0.3477	-0.3176	0.000154	1.67e-06	0.5366	0.2947	0.4215	T	A	intergenic	LINC02211;CDH9	dist=272480;dist=1305837	.	5	25574760	0.000154	1.67e-06	0.5366	0.2947	0.4215	T	A	0.4161	942	0.3413	334	0.4572	608	0.424	500	0.3058	206	0.4932	294	0.3468	222	0.3889	54	0.3333	168	0.4868	76	0.4	20
rs6874001	5	25575083	-0.5853	-1.06	0.4292	0.3477	-0.3176	0.000154	1.67e-06	0.5366	0.2947	0.4215	C	T	intergenic	LINC02211;CDH9	dist=272803;dist=1305514	.	5	25575083	0.000154	1.67e-06	0.5366	0.2947	0.4215	C	T	0.4161	942	0.3413	334	0.4572	608	0.424	500	0.3058	206	0.4932	294	0.3468	222	0.3889	54	0.3333	168	0.4868	76	0.4	20
rs6889399	5	25575158	-0.5853	-1.06	0.4292	0.3477	-0.3176	0.000154	1.67e-06	0.5366	0.2947	0.4215	A	C	intergenic	LINC02211;CDH9	dist=272878;dist=1305439	.	5	25575158	0.000154	1.67e-06	0.5366	0.2947	0.4215	A	C	0.4161	942	0.3413	334	0.4572	608	0.424	500	0.3058	206	0.4932	294	0.3468	222	0.3889	54	0.3333	168	0.4868	76	0.4	20
rs7719219	5	25575842	0.5239	1.005	0.1018	0.269	-0.1375	0.0005481	3.37e-06	0.8789	0.4111	0.7218	C	T	intergenic	LINC02211;CDH9	dist=273562;dist=1304755	.	5	25575842	0.0005481	3.37e-06	0.8789	0.4111	0.7218	T	C	0.4915	942	0.4491	334	0.4589	608	0.45	500	0.4369	206	0.3707	294	0.3874	222	0.4259	54	0.375	168	0.4079	76	0.5	20
rs13158186	5	25576130	-0.7014	-1.296	0.7649	0.4011	-0.1615	0.0008491	9.95e-06	0.3126	0.408	0.7737	G	A	intergenic	LINC02211;CDH9	dist=273850;dist=1304467	.	5	25576130	0.0008491	9.95e-06	0.3126	0.408	0.7737	G	A	0.1773	942	0.1287	334	0.2039	608	0.2072	502	0.1165	206	0.2703	296	0.1273	220	0.1481	54	0.1205	166	0.1974	76	0.2	20
rs72743208	5	25577475	0.6932	1.038	1.692	-1.067	0.5621	0.0003619	4.77e-05	0.0688	0.122	0.3421	G	A	intergenic	LINC02211;CDH9	dist=275195;dist=1303122	.	5	25577475	0.0003619	4.77e-05	0.0688	0.122	0.3421	G	A	0.1745	940	0.2365	334	0.1403	606	0.214	500	0.2961	206	0.1565	294	0.1227	220	0.07407	54	0.1386	166	0.1447	76	0.25	20
rs34706562	5	25578018	-0.6713	-1.212	2.35	0.4445	-0.2307	0.001968	3.75e-05	0.08507	0.3583	0.688	T	C	intergenic	LINC02211;CDH9	dist=275738;dist=1302579	.	5	25578018	0.001968	3.75e-05	0.08507	0.3583	0.688	T	C	0.1617	940	0.1228	334	0.1832	606	0.198	500	0.1165	206	0.2551	294	0.1227	220	0.1481	54	0.1145	166	0.1053	76	0.15	20
rs34205229	5	25578278	-0.6698	-1.21	2.175	0.4095	-0.2307	0.002028	3.93e-05	0.09566	0.3985	0.688	T	C	intergenic	LINC02211;CDH9	dist=275998;dist=1302319	.	5	25578278	0.002028	3.93e-05	0.09566	0.3985	0.688	T	C	0.1624	942	0.1235	332	0.1836	610	0.1972	502	0.1165	206	0.2534	296	0.1261	222	0.1481	54	0.119	168	0.1081	74	0.1667	18
rs77943064	5	25578425	0.4392	0.9725	0.3313	0.5461	0.02117	0.003485	7.05e-06	0.6329	0.09876	0.9573	G	A	intergenic	LINC02211;CDH9	dist=276145;dist=1302172	.	5	25578425	0.003485	7.05e-06	0.6329	0.09876	0.9573	A	G	0.4936	938	0.4551	334	0.4652	604	0.4578	498	0.4369	206	0.3836	292	0.4273	220	0.5	54	0.4036	166	0.4342	76	0.45	20
rs12655111	5	25578637	-0.5104	-1.181	NA	0.6657	-0.4794	0.003368	9.29e-06	NA	0.06497	0.2752	G	T	intergenic	LINC02211;CDH9	dist=276357;dist=1301960	.	5	25578637	0.003368	9.29e-06	NA	0.06497	0.2752	G	T	0.2852	922	0.2199	332	0.322	590	0.248	496	0.1471	204	0.3185	292	0.3148	216	0.3889	54	0.2901	162	0.3056	72	0.3	20
rs7711694	5	25579466	-0.4097	0.9716	-0.01066	0.5604	0.02117	0.006115	7.24e-06	0.9872	0.08933	0.9573	A	G	intergenic	LINC02211;CDH9	dist=277186;dist=1301131	.	5	25579466	0.006115	7.24e-06	0.9872	0.08933	0.9573	G	A	0.4989	942	0.4551	334	0.4737	608	0.458	500	0.4369	206	0.3844	294	0.4234	222	0.5	54	0.3988	168	0.4868	76	0.45	20
rs12655229	5	25579569	-0.4973	-1.223	0.8701	0.6832	-0.4071	0.003804	4.44e-06	0.2793	0.05534	0.3321	G	A	intergenic	LINC02211;CDH9	dist=277289;dist=1301028	.	5	25579569	0.003804	4.44e-06	0.2793	0.05534	0.3321	G	A	0.2834	942	0.2216	334	0.3174	608	0.252	500	0.1505	206	0.3231	294	0.3063	222	0.3889	54	0.2798	168	0.2763	76	0.3	20
rs7713181	5	25579697	0.437	0.9741	0.3313	0.5464	0.02117	0.003644	7.04e-06	0.6329	0.09856	0.9573	A	C	intergenic	LINC02211;CDH9	dist=277417;dist=1300900	.	5	25579697	0.003644	7.04e-06	0.6329	0.09856	0.9573	C	A	0.4947	942	0.4521	334	0.4655	608	0.4582	502	0.4369	206	0.3851	296	0.4273	220	0.5	54	0.4036	166	0.4342	76	0.45	20
rs35012638	5	25589611	-0.6613	-1.196	2.35	0.4011	-0.2307	0.002283	4.95e-05	0.08507	0.408	0.688	A	G	intergenic	LINC02211;CDH9	dist=287331;dist=1290986	.	5	25589611	0.002283	4.95e-05	0.08507	0.408	0.688	A	G	0.1617	940	0.1228	334	0.1832	606	0.196	500	0.1165	206	0.2517	294	0.1273	220	0.1481	54	0.1205	166	0.1053	76	0.15	20
rs11958605	5	25590547	-0.6769	-1.212	2.35	0.4095	-0.2307	0.001812	3.75e-05	0.08507	0.3985	0.688	G	A	intergenic	LINC02211;CDH9	dist=288267;dist=1290050	.	5	25590547	0.001812	3.75e-05	0.08507	0.3985	0.688	G	A	0.1624	942	0.1228	334	0.1842	608	0.198	500	0.1165	206	0.2551	294	0.1261	222	0.1481	54	0.119	168	0.1053	76	0.15	20
rs10805781	5	25590822	0.675	1	1.692	-1.064	0.4247	0.0003923	5.47e-05	0.0688	0.1238	0.463	A	T	intergenic	LINC02211;CDH9	dist=288542;dist=1289775	.	5	25590822	0.0003923	5.47e-05	0.0688	0.1238	0.463	A	T	0.1815	942	0.2455	334	0.1464	608	0.226	500	0.3107	206	0.1667	294	0.1216	222	0.07407	54	0.1369	168	0.1447	76	0.25	20
rs6862120	5	25593407	-0.6501	-1.161	2.35	0.4095	-0.2307	0.002531	6.19e-05	0.08507	0.3985	0.688	C	A	intergenic	LINC02211;CDH9	dist=291127;dist=1287190	.	5	25593407	0.002531	6.19e-05	0.08507	0.3985	0.688	C	A	0.1642	938	0.1265	332	0.1848	606	0.2008	498	0.1214	206	0.2568	292	0.1261	222	0.1481	54	0.119	168	0.1053	76	0.15	20
rs12515056	5	25594888	0.4278	0.9567	0.3313	0.5489	0.02117	0.004522	1.06e-05	0.6329	0.09797	0.9573	G	A	intergenic	LINC02211;CDH9	dist=292608;dist=1285709	.	5	25594888	0.004522	1.06e-05	0.6329	0.09797	0.9573	A	G	0.4926	942	0.4581	334	0.4655	608	0.456	500	0.4417	206	0.3844	294	0.4279	222	0.5	54	0.4048	168	0.4342	76	0.45	20
rs13183626	5	25595069	-0.6241	-1.155	3.432	0.4095	-0.1754	0.003733	6.58e-05	0.04442	0.3985	0.7598	T	C	intergenic	LINC02211;CDH9	dist=292789;dist=1285528	.	5	25595069	0.003733	6.58e-05	0.04442	0.3985	0.7598	T	C	0.1603	942	0.1257	334	0.1793	608	0.2	500	0.1214	206	0.2551	294	0.1261	222	0.1481	54	0.119	168	0.07895	76	0.15	20
rs6859698	5	25598039	-0.646	-1.155	2.35	0.4095	-0.2307	0.002679	6.58e-05	0.08507	0.3985	0.688	T	A	intergenic	LINC02211;CDH9	dist=295759;dist=1282558	.	5	25598039	0.002679	6.58e-05	0.08507	0.3985	0.688	T	A	0.1635	942	0.1257	334	0.1842	608	0.2	500	0.1214	206	0.2551	294	0.1261	222	0.1481	54	0.119	168	0.1053	76	0.15	20
rs10057464	5	25598399	0.4098	0.9413	0.3313	0.5604	0.02117	0.006255	1.38e-05	0.6329	0.08933	0.9573	C	G	intergenic	LINC02211;CDH9	dist=296119;dist=1282198	.	5	25598399	0.006255	1.38e-05	0.6329	0.08933	0.9573	G	C	0.4947	944	0.4581	334	0.4689	610	0.4582	502	0.4417	206	0.3885	296	0.4234	222	0.5	54	0.3988	168	0.4342	76	0.45	20
rs10223129	5	25599470	0.3925	0.9384	0.3313	0.5604	0.1295	0.008528	1.43e-05	0.6329	0.08933	0.7392	A	G	intergenic	LINC02211;CDH9	dist=297190;dist=1281127	.	5	25599470	0.008528	1.43e-05	0.6329	0.08933	0.7392	G	A	0.4936	942	0.4611	334	0.4688	608	0.458	500	0.4417	206	0.3878	294	0.4234	222	0.5	54	0.3988	168	0.4342	76	0.45	20
rs1382886	5	25601761	0.38	0.9685	0.3313	0.573	-0.2577	0.01136	9.86e-06	0.6329	0.07936	0.5193	C	G	intergenic	LINC02211;CDH9	dist=299481;dist=1278836	.	5	25601761	0.01136	9.86e-06	0.6329	0.07936	0.5193	G	C	0.4798	940	0.476	334	0.4554	606	0.4502	502	0.4466	206	0.3784	296	0.4182	220	0.5	54	0.3916	166	0.4342	76	0.45	20
rs6894921	5	25606054	0.3888	0.9669	0.3313	0.5738	-0.2111	0.009512	9.96e-06	0.6329	0.07921	0.5914	T	C	intergenic	LINC02211;CDH9	dist=303774;dist=1274543	.	5	25606054	0.009512	9.96e-06	0.6329	0.07921	0.5914	C	T	0.4788	942	0.476	334	0.4539	608	0.45	500	0.4466	206	0.3776	294	0.4189	222	0.5	54	0.3929	168	0.4342	76	0.45	20
rs1478858	5	29163837	-0.2817	0.01776	-1.313	2.286	-0.1665	0.0756	0.9303	0.1606	2.04e-05	0.6592	A	C	ncRNA_intronic	LINC02109	.	.	5	29163837	0.0756	0.9303	0.1606	2.04e-05	0.6592	C	A	0.4301	944	0.3593	334	0.4689	610	0.3008	502	0.301	206	0.3007	296	0.3153	222	0.4444	54	0.2381	168	0.4474	76	0.4	20
rs4867001	5	29169560	-0.2891	0.02704	0.6907	2.347	-0.201	0.07161	0.8949	0.3127	1.42e-05	0.6106	C	G	ncRNA_exonic	LINC02109	.	.	5	29169560	0.07161	0.8949	0.3127	1.42e-05	0.6106	G	C	0.3992	942	0.3353	334	0.4342	608	0.296	500	0.301	206	0.2925	294	0.3063	222	0.4444	54	0.2262	168	0.2895	76	0.4	20
rs1478870	5	29170013	-0.3717	0.01028	-0.03112	2.368	-0.3342	0.01984	0.9596	0.9652	1.01e-05	0.3894	T	A	ncRNA_intronic	LINC02109	.	.	5	29170013	0.01984	0.9596	0.9652	1.01e-05	0.3894	A	T	0.4268	942	0.3473	334	0.4704	608	0.304	500	0.3058	206	0.3027	294	0.3018	222	0.4444	54	0.2202	168	0.4737	76	0.45	20
rs34762208	5	29213860	0.2619	-0.1349	0.06409	2.073	0.4598	0.09756	0.5284	0.9084	3.28e-05	0.2413	T	G	intergenic	LINC02109;LINC02064	dist=40884;dist=166229	.	5	29213860	0.09756	0.5284	0.9084	3.28e-05	0.2413	T	G	0.304	944	0.3443	334	0.282	610	0.3187	502	0.3058	206	0.3277	296	0.1937	222	0.4074	54	0.125	168	0.4079	76	0.4	20
rs34812954	5	29265418	0.2418	-0.07681	0.2473	2.01	-0.1107	0.1121	0.6955	0.7229	5.84e-05	0.7803	A	G	intergenic	LINC02109;LINC02064	dist=92442;dist=114671	.	5	29265418	0.1121	0.6955	0.7229	5.84e-05	0.7803	A	G	0.4023	942	0.4401	334	0.3816	608	0.38	500	0.3738	206	0.3844	294	0.3243	222	0.4444	54	0.25	168	0.4474	76	0.45	20
rs55889171	5	55966983	0.6078	0.4892	1.469	-0.4151	1.07	5.95e-05	0.0141	0.04432	0.2777	0.011	A	G	intronic	IL6ST	.	.	5	55966983	5.95e-05	0.0141	0.04432	0.2777	0.011	A	G	0.4533	942	0.476	334	0.4145	608	0.418	500	0.4757	206	0.3776	294	0.4505	222	0.3704	54	0.4762	168	0.3289	76	0.45	20
rs13171653	5	65845246	-0.5971	-0.4433	-1.388	0.641	1.109	9.71e-05	0.02272	0.09895	0.07512	0.01495	C	T	intergenic	NLN;ERBIN	dist=15963;dist=81308	.	5	65845246	9.71e-05	0.02272	0.09895	0.07512	0.01495	T	C	0.4311	944	0.3473	334	0.477	610	0.3825	502	0.3301	206	0.4189	296	0.4865	222	0.4259	54	0.4583	168	0.3289	76	0.15	20
rs11948927	5	65864237	-0.5808	-0.4881	-1.949	0.5865	0.997	0.000103	0.01001	0.04626	0.09668	0.02778	A	C	intergenic	NLN;ERBIN	dist=34954;dist=62317	.	5	65864237	0.000103	0.01001	0.04626	0.09668	0.02778	C	A	0.4735	942	0.3862	334	0.4786	608	0.436	500	0.3689	206	0.483	294	0.4685	222	0.4444	54	0.4405	168	0.3816	76	0.2	20
rs12652648	5	65869612	-0.5808	-0.4881	-1.949	0.5865	0.997	0.000103	0.01001	0.04626	0.09668	0.02778	A	C	intergenic	NLN;ERBIN	dist=40329;dist=56942	.	5	65869612	0.000103	0.01001	0.04626	0.09668	0.02778	C	A	0.4735	942	0.3862	334	0.4786	608	0.436	500	0.3689	206	0.483	294	0.4685	222	0.4444	54	0.4405	168	0.3816	76	0.2	20
rs2997128	5	66359068	0.6835	0.7228	2.181	0.3815	1.016	5.58e-05	0.001279	0.03287	0.3067	0.05428	C	T	intergenic	LINC02065;LINC02229	dist=149622;dist=148477	.	5	66359068	5.58e-05	0.001279	0.03287	0.3067	0.05428	T	C	0.2934	944	0.3683	334	0.2525	610	0.2948	502	0.3738	206	0.2399	296	0.2928	222	0.3333	54	0.2798	168	0.4342	76	0.4	20
rs2997125	5	66359584	0.6721	0.7254	2.181	0.3014	1.016	7.85e-05	0.001219	0.03287	0.4315	0.05428	C	T	intergenic	LINC02065;LINC02229	dist=150138;dist=147961	.	5	66359584	7.85e-05	0.001219	0.03287	0.4315	0.05428	T	C	0.2919	942	0.3653	334	0.2516	608	0.294	500	0.3738	206	0.2381	294	0.2883	222	0.3148	54	0.2798	168	0.4342	76	0.4	20
rs3863202	5	155631045	-1.075	-0.962	-2.36	-1.027	-0.8366	6.51e-05	0.003683	0.04605	0.1852	0.2929	A	G	intergenic	KIF4B;SGCD	dist=612911;dist=696119	.	5	155631045	6.51e-05	0.003683	0.04605	0.1852	0.2929	A	G	0.1303	944	0.06886	334	0.1639	610	0.1315	502	0.07767	206	0.1689	296	0.09009	222	0.03704	54	0.1071	168	0.2895	76	0.1	20
rs78592638	5	161818675	1.306	1.194	2.827	2.457	1.613	5.93e-05	0.001334	0.04924	0.02577	0.2228	T	G	intergenic	GABRA6;GABRA1	dist=116083;dist=28516	.	5	161818675	5.93e-05	0.001334	0.04924	0.02577	0.2228	T	G	0.05308	942	0.09581	334	0.02961	608	0.076	500	0.1214	206	0.04422	294	0.02703	222	0.05556	54	0.01786	168	0.03947	76	0.1	20
rs75927589	5	161818693	1.301	1.194	2.827	2.457	1.585	6.29e-05	0.001334	0.04924	0.02577	0.2314	C	A	intergenic	GABRA6;GABRA1	dist=116101;dist=28498	.	5	161818693	6.29e-05	0.001334	0.04924	0.02577	0.2314	C	A	0.05319	940	0.09581	334	0.0297	606	0.076	500	0.1214	206	0.04422	294	0.02703	222	0.05556	54	0.01786	168	0.03947	76	0.1	20
rs10475700	5	161842765	1.153	0.9865	NA	2.457	1.585	7.86e-05	0.001914	NA	0.02577	0.2314	T	C	intergenic	GABRA6;GABRA1	dist=140173;dist=4426	.	5	161842765	7.86e-05	0.001914	NA	0.02577	0.2314	T	C	0.06688	942	0.1168	334	0.03947	608	0.1036	502	0.1553	206	0.06757	296	0.02703	222	0.05556	54	0.01786	168	0.02632	76	0.1	20
rs78983363	5	161845429	1.148	0.9865	NA	2.451	1.585	8.32e-05	0.001914	NA	0.02637	0.2314	G	A	intergenic	GABRA6;GABRA1	dist=142837;dist=1762	.	5	161845429	8.32e-05	0.001914	NA	0.02637	0.2314	G	A	0.06702	940	0.1168	334	0.0396	606	0.1036	502	0.1553	206	0.06757	296	0.02727	220	0.05556	54	0.01807	166	0.02632	76	0.1	20
rs6875063	5	163241628	-0.425	-0.8697	0.4735	0.04397	0.1414	0.009513	9.4e-05	0.6219	0.908	0.7379	T	C	intergenic	GABRG2;CCNG1	dist=1086089;dist=195943	.	5	163241628	0.009513	9.4e-05	0.6219	0.908	0.7379	T	C	0.2813	942	0.2455	334	0.301	608	0.322	500	0.2379	206	0.381	294	0.2748	222	0.2963	54	0.2679	168	0.1316	76	0.15	20
C5_181179873	5	181179873	0.9214	1.15	0.7376	0.7665	0.1546	9.46e-06	4.31e-05	0.469	0.09524	0.7758	G	A	intergenic	OR2V2;LINC01962	dist=23983;dist=11173	.	5	181179873	9.46e-06	4.31e-05	0.469	0.09524	0.7758	G	A	0.2295	928	0.2994	334	0.1902	594	0.249	490	0.3204	206	0.1972	284	0.1636	220	0.2407	54	0.1386	166	0.3243	74	0.4	20
rs35985090	6	5942678	0.6089	0.6479	0.5311	-0.1621	1.288	8.28e-05	0.001391	0.481	0.6215	0.006821	T	TA	intergenic	FARS2;NRN1	dist=171095;dist=55322	rs35985090	6	5942678	8.28e-05	0.001391	0.481	0.6215	0.006821	T	TA	0.4098	942	0.488	334	0.3668	608	0.37	500	0.4612	206	0.3061	294	0.4189	222	0.3889	54	0.4286	168	0.2105	76	0.3	20
rs9285969	6	5945406	0.6028	0.619	1.02	-0.193	1.13	9.86e-05	0.002241	0.1965	0.5677	0.01189	A	G	intergenic	FARS2;NRN1	dist=173823;dist=52594	.	6	5945406	9.86e-05	0.002241	0.1965	0.5677	0.01189	G	A	0.4138	940	0.491	332	0.3717	608	0.374	500	0.4612	206	0.3129	294	0.4182	220	0.3846	52	0.4286	168	0.2237	76	0.35	20
rs34163412	6	9188123	0.6458	0.596	2.807	0.9267	0.2228	8.88e-05	0.005148	0.01414	0.01642	0.6642	T	C	intergenic	LOC100506207;TFAP2A	dist=402678;dist=1208554	.	6	9188123	8.88e-05	0.005148	0.01414	0.01642	0.6642	T	C	0.2527	942	0.3263	334	0.2122	608	0.282	500	0.3447	206	0.2381	294	0.2342	222	0.3333	54	0.2024	168	0.2632	76	0.5	20
rs557767	6	12223194	0.6303	0.6452	0.6164	0.09506	1.295	4.35e-05	0.001306	0.3548	0.8253	0.00251	T	C	intergenic	HIVEP1;EDN1	dist=58195;dist=67167	.	6	12223194	4.35e-05	0.001306	0.3548	0.8253	0.00251	T	C	0.322	944	0.4251	334	0.2656	610	0.3625	502	0.4515	206	0.3007	296	0.2432	222	0.2407	54	0.244	168	0.1974	76	0.3	20
rs2180030	6	12223396	0.6119	0.6391	0.5229	0.09506	1.246	7.21e-05	0.001459	0.4359	0.8253	0.003448	G	A	intergenic	HIVEP1;EDN1	dist=58397;dist=66965	.	6	12223396	7.21e-05	0.001459	0.4359	0.8253	0.003448	G	A	0.3248	942	0.4251	334	0.2697	608	0.364	500	0.4515	206	0.3027	294	0.2432	222	0.2407	54	0.244	168	0.2105	76	0.3	20
rs17592421	6	12223689	0.6119	0.6391	0.5229	0.09506	1.246	7.21e-05	0.001459	0.4359	0.8253	0.003448	A	G	intergenic	HIVEP1;EDN1	dist=58690;dist=66672	.	6	12223689	7.21e-05	0.001459	0.4359	0.8253	0.003448	A	G	0.3248	942	0.4251	334	0.2697	608	0.364	500	0.4515	206	0.3027	294	0.2432	222	0.2407	54	0.244	168	0.2105	76	0.3	20
rs111531590	6	12225070	0.6169	0.6452	0.5229	0.09506	1.246	6.23e-05	0.001306	0.4359	0.8253	0.003448	C	CA	intergenic	HIVEP1;EDN1	dist=60071;dist=65291	rs111531590	6	12225070	6.23e-05	0.001306	0.4359	0.8253	0.003448	CA	C	0.3242	944	0.4251	334	0.2689	610	0.3625	502	0.4515	206	0.3007	296	0.2432	222	0.2407	54	0.244	168	0.2105	76	0.3	20
rs17592533	6	12225468	0.6245	0.6391	0.5229	0.2155	1.246	4.79e-05	0.001459	0.4359	0.5999	0.003448	G	A	intergenic	HIVEP1;EDN1	dist=60469;dist=64893	.	6	12225468	4.79e-05	0.001459	0.4359	0.5999	0.003448	G	A	0.3259	942	0.4281	334	0.2697	608	0.364	500	0.4515	206	0.3027	294	0.2477	222	0.2593	54	0.244	168	0.2105	76	0.3	20
rs9367045	6	12228077	0.6016	0.612	0.5229	0.1478	1.246	9.12e-05	0.00217	0.4359	0.7319	0.003448	T	C	intergenic	HIVEP1;EDN1	dist=63078;dist=62284	.	6	12228077	9.12e-05	0.00217	0.4359	0.7319	0.003448	T	C	0.3227	942	0.4222	334	0.2681	608	0.362	500	0.4466	206	0.3027	294	0.2387	222	0.2407	54	0.2381	168	0.2105	76	0.3	20
rs9471240	6	12229090	0.6071	0.5635	0.402	0.1636	1.641	5.77e-05	0.003222	0.5332	0.6978	0.0009076	A	G	intergenic	HIVEP1;EDN1	dist=64091;dist=61271	.	6	12229090	5.77e-05	0.003222	0.5332	0.6978	0.0009076	G	A	0.3737	942	0.479	334	0.3158	608	0.422	500	0.4951	206	0.3639	294	0.2477	222	0.2593	54	0.244	168	0.3553	76	0.4	20
rs1794859	6	12229605	0.5965	0.612	0.5229	0.1036	1.246	0.0001043	0.00217	0.4359	0.8097	0.003448	G	A	intergenic	HIVEP1;EDN1	dist=64606;dist=60756	.	6	12229605	0.0001043	0.00217	0.4359	0.8097	0.003448	G	A	0.3238	942	0.4222	334	0.2697	608	0.362	500	0.4466	206	0.3027	294	0.2432	222	0.2407	54	0.244	168	0.2105	76	0.3	20
rs80181197	6	12229673	0.5987	0.6181	0.5229	0.08343	1.246	9.74e-05	0.001946	0.4359	0.8466	0.003448	G	A	intergenic	HIVEP1;EDN1	dist=64674;dist=60688	.	6	12229673	9.74e-05	0.001946	0.4359	0.8466	0.003448	G	A	0.3238	942	0.4222	334	0.2697	608	0.3606	502	0.4466	206	0.3007	296	0.2455	220	0.2407	54	0.247	166	0.2105	76	0.3	20
rs1028715	6	12230522	0.6459	0.5701	0.9041	0.1691	1.641	1.73e-05	0.002853	0.1444	0.6809	0.0009076	T	C	intergenic	HIVEP1;EDN1	dist=65523;dist=59839	.	6	12230522	1.73e-05	0.002853	0.1444	0.6809	0.0009076	C	T	0.375	944	0.488	334	0.3131	610	0.4203	502	0.4951	206	0.3615	296	0.2477	222	0.2593	54	0.244	168	0.3816	76	0.45	20
rs484690	6	12234365	0.6177	0.6017	0.7961	0.182	1.246	6.87e-05	0.002628	0.2434	0.6783	0.003448	G	A	intergenic	HIVEP1;EDN1	dist=69366;dist=55996	.	6	12234365	6.87e-05	0.002628	0.2434	0.6783	0.003448	G	A	0.3248	942	0.4251	334	0.2697	608	0.364	500	0.4466	206	0.3061	294	0.2342	222	0.2407	54	0.2321	168	0.2368	76	0.35	20
rs4490660	6	12234966	0.614	0.6181	0.4215	0.182	1.246	7.3e-05	0.001946	0.5364	0.6783	0.003448	C	T	intergenic	HIVEP1;EDN1	dist=69967;dist=55395	.	6	12234966	7.3e-05	0.001946	0.5364	0.6783	0.003448	C	T	0.322	944	0.4222	334	0.2672	610	0.3606	502	0.4466	206	0.3007	296	0.2342	222	0.2407	54	0.2321	168	0.2237	76	0.3	20
rs59188071	6	12235301	0.6329	0.6181	0.6164	0.182	1.295	4.34e-05	0.001946	0.3548	0.6783	0.00251	C	T	intergenic	HIVEP1;EDN1	dist=70302;dist=55060	.	6	12235301	4.34e-05	0.001946	0.3548	0.6783	0.00251	C	T	0.3189	944	0.4222	334	0.2623	610	0.3606	502	0.4466	206	0.3007	296	0.2342	222	0.2407	54	0.2321	168	0.1974	76	0.3	20
rs57835349	6	12237098	0.6694	0.6293	1.033	0.2686	1.295	1.17e-05	0.001445	0.1105	0.5212	0.00251	G	T	intergenic	HIVEP1;EDN1	dist=72099;dist=53263	.	6	12237098	1.17e-05	0.001445	0.1105	0.5212	0.00251	G	T	0.3291	942	0.4371	334	0.2697	608	0.368	500	0.4563	206	0.3061	294	0.2387	222	0.2593	54	0.2321	168	0.2632	76	0.4	20
rs9357318	6	12237761	0.6363	0.6017	0.9756	0.182	1.295	4.09e-05	0.002628	0.1471	0.6783	0.00251	G	A	intergenic	HIVEP1;EDN1	dist=72762;dist=52600	.	6	12237761	4.09e-05	0.002628	0.1471	0.6783	0.00251	G	A	0.3217	942	0.4251	334	0.2648	608	0.364	500	0.4466	206	0.3061	294	0.2342	222	0.2407	54	0.2321	168	0.2105	76	0.35	20
rs553182	6	12238694	0.6138	0.5542	1.125	0.182	1.295	6.22e-05	0.004791	0.09743	0.6783	0.00251	G	A	intergenic	HIVEP1;EDN1	dist=73695;dist=51667	.	6	12238694	6.22e-05	0.004791	0.09743	0.6783	0.00251	G	A	0.327	942	0.4281	334	0.2714	608	0.368	500	0.4466	206	0.3129	294	0.2342	222	0.2407	54	0.2321	168	0.25	76	0.4	20
rs507752	6	12241110	0.6036	0.6012	0.7268	0.1069	1.214	9.3e-05	0.002864	0.2891	0.7954	0.003686	G	A	intergenic	HIVEP1;EDN1	dist=76111;dist=49251	.	6	12241110	9.3e-05	0.002864	0.2891	0.7954	0.003686	G	A	0.3233	928	0.4207	328	0.27	600	0.3557	492	0.4356	202	0.3	290	0.2639	216	0.2692	52	0.2622	164	0.1842	76	0.3	20
rs9394667	6	12241231	0.5975	0.5746	0.7268	0.1847	1.214	0.0001097	0.004441	0.2891	0.6455	0.003686	C	T	intergenic	HIVEP1;EDN1	dist=76232;dist=49130	.	6	12241231	0.0001097	0.004441	0.2891	0.6455	0.003686	C	T	0.3204	930	0.4157	332	0.2676	598	0.351	490	0.4265	204	0.2972	286	0.2636	220	0.2778	54	0.259	166	0.1842	76	0.3	20
rs9394671	6	12241440	0.6104	0.59	0.7268	0.2052	1.214	7.09e-05	0.003182	0.2891	0.6084	0.003686	A	G	intergenic	HIVEP1;EDN1	dist=76441;dist=48921	.	6	12241440	7.09e-05	0.003182	0.2891	0.6084	0.003686	A	G	0.3217	942	0.4192	334	0.2681	608	0.354	500	0.432	206	0.2993	294	0.2613	222	0.2778	54	0.256	168	0.1842	76	0.3	20
C6_M2072	6	12242376	0.6205	0.59	0.587	0.228	1.214	6.38e-05	0.003182	0.3864	0.5971	0.003686	T	TGACC	intergenic	HIVEP1;EDN1	dist=77377;dist=47985	rs25623	6	12242376	6.38e-05	0.003182	0.3864	0.5971	0.003686	TGACC	T	0.3217	942	0.4192	334	0.2681	608	0.354	500	0.432	206	0.2993	294	0.2432	222	0.2593	54	0.2381	168	0.2368	76	0.35	20
rs9349146	6	12245183	0.6853	0.6418	1.444	0.1924	1.349	7.8e-06	0.001246	0.03841	0.6568	0.0021	G	A	intergenic	HIVEP1;EDN1	dist=80184;dist=45178	.	6	12245183	7.8e-06	0.001246	0.03841	0.6568	0.0021	G	A	0.3323	942	0.4401	334	0.273	608	0.36	500	0.4466	206	0.2993	294	0.2477	222	0.2593	54	0.244	168	0.3026	76	0.5	20
rs9394678	6	12245442	0.6354	0.6222	0.7268	0.1924	1.214	3.95e-05	0.001761	0.2891	0.6568	0.003686	G	A	intergenic	HIVEP1;EDN1	dist=80443;dist=44919	.	6	12245442	3.95e-05	0.001761	0.2891	0.6568	0.003686	G	A	0.3178	944	0.4192	334	0.2623	610	0.3526	502	0.4369	206	0.2939	296	0.2477	222	0.2593	54	0.244	168	0.1842	76	0.3	20
rs1998527	6	12249211	-0.5962	-0.5791	-1.863	-0.312	-0.7105	8.7e-05	0.003238	0.03171	0.4527	0.04636	G	A	intergenic	HIVEP1;EDN1	dist=84212;dist=41150	.	6	12249211	8.7e-05	0.003238	0.03171	0.4527	0.04636	A	G	0.4406	942	0.3772	334	0.4753	608	0.478	500	0.4126	206	0.4762	294	0.3333	222	0.3148	54	0.3393	168	0.3947	76	0.2	20
rs500843	6	12250689	-0.5974	-0.6478	-1.235	-0.312	0.657	7.48e-05	0.001301	0.06131	0.4527	0.05984	C	T	intergenic	HIVEP1;EDN1	dist=85690;dist=39672	.	6	12250689	7.48e-05	0.001301	0.06131	0.4527	0.05984	T	C	0.4628	942	0.3982	334	0.4984	608	0.498	502	0.4272	206	0.4527	296	0.3333	222	0.3148	54	0.3393	168	0.4737	76	0.35	20
rs511319	6	12250955	0.6068	0.6033	0.8269	0.2052	1.158	7.81e-05	0.002575	0.2222	0.6084	0.005913	C	G	intergenic	HIVEP1;EDN1	dist=85956;dist=39406	.	6	12250955	7.81e-05	0.002575	0.2222	0.6084	0.005913	C	G	0.3185	942	0.4132	334	0.2664	608	0.35	500	0.4272	206	0.2959	294	0.2613	222	0.2778	54	0.256	168	0.1711	76	0.3	20
rs542483	6	12252074	0.664	0.6145	1.439	0.228	1.322	1.61e-05	0.002226	0.03349	0.5971	0.00287	A	G	intergenic	HIVEP1;EDN1	dist=87075;dist=38287	.	6	12252074	1.61e-05	0.002226	0.03349	0.5971	0.00287	A	G	0.3266	940	0.4281	334	0.2706	606	0.354	500	0.432	206	0.2993	294	0.2432	222	0.2593	54	0.2381	168	0.2895	76	0.5	20
rs544134	6	12252224	-0.5947	-0.6249	-1.92	-0.2191	0.663	8.3e-05	0.001763	0.02124	0.6071	0.05884	C	T	intergenic	HIVEP1;EDN1	dist=87225;dist=38137	.	6	12252224	8.3e-05	0.001763	0.02124	0.6071	0.05884	T	C	0.4672	944	0.4012	334	0.4967	610	0.496	502	0.4272	206	0.4561	296	0.3559	222	0.3519	54	0.3571	168	0.4737	76	0.3	20
rs9380949	6	12252788	0.6064	0.588	0.8269	0.228	1.158	9.7e-05	0.003472	0.2222	0.5971	0.005913	A	G	intergenic	HIVEP1;EDN1	dist=87789;dist=37573	.	6	12252788	9.7e-05	0.003472	0.2222	0.5971	0.005913	A	G	0.3132	942	0.4072	334	0.2615	608	0.348	500	0.4223	206	0.2959	294	0.2432	222	0.2593	54	0.2381	168	0.1711	76	0.3	20
rs9349152	6	12254608	0.6708	0.624	1.686	0.3643	1.322	7.08e-06	0.001767	0.02408	0.29	0.00287	G	A	intergenic	HIVEP1;EDN1	dist=89609;dist=35753	.	6	12254608	7.08e-06	0.001767	0.02408	0.29	0.00287	G	A	0.3819	940	0.4731	334	0.3317	606	0.356	500	0.4369	206	0.2993	294	0.4595	222	0.5	54	0.4464	168	0.3289	76	0.45	20
rs4714340	6	12255057	0.679	0.6662	1.262	0.3643	1.322	5.71e-06	0.0009262	0.05156	0.29	0.00287	C	T	intergenic	HIVEP1;EDN1	dist=90058;dist=35304	.	6	12255057	5.71e-06	0.0009262	0.05156	0.29	0.00287	C	T	0.3779	942	0.4701	334	0.3273	608	0.3506	502	0.4369	206	0.2905	296	0.4595	222	0.5	54	0.4464	168	0.3158	76	0.5	20
rs4714341	6	12255420	0.68	0.6408	1.686	0.3643	1.287	5.14e-06	0.001297	0.02408	0.29	0.003399	C	A	intergenic	HIVEP1;EDN1	dist=90421;dist=34941	.	6	12255420	5.14e-06	0.001297	0.02408	0.29	0.003399	C	A	0.3803	944	0.4731	334	0.3295	610	0.3526	502	0.4369	206	0.2939	296	0.4595	222	0.5	54	0.4464	168	0.3289	76	0.45	20
rs25624	6	12257040	0.6702	0.6301	1.686	0.337	1.322	6.62e-06	0.001583	0.02408	0.3165	0.00287	A	AAG	intergenic	HIVEP1;EDN1	dist=92041;dist=33321	rs25624	6	12257040	6.62e-06	0.001583	0.02408	0.3165	0.00287	AAG	A	0.3811	942	0.4731	334	0.3306	608	0.3546	502	0.4369	206	0.2973	296	0.4595	222	0.5	54	0.4464	168	0.3289	76	0.45	20
rs1739343	6	12258537	0.6678	0.6625	1.037	0.3892	1.287	8.87e-06	0.001009	0.09887	0.261	0.003399	G	T	intergenic	HIVEP1;EDN1	dist=93538;dist=31824	.	6	12258537	8.87e-06	0.001009	0.09887	0.261	0.003399	G	T	0.3763	938	0.4669	332	0.3267	606	0.3514	498	0.4369	206	0.2911	292	0.4545	220	0.5	52	0.4405	168	0.3026	76	0.45	20
rs17593571	6	12259210	0.6138	0.6233	0.8269	0.1477	1.192	6.17e-05	0.001929	0.2222	0.7039	0.004966	C	A	intergenic	HIVEP1;EDN1	dist=94211;dist=31151	.	6	12259210	6.17e-05	0.001929	0.2222	0.7039	0.004966	C	A	0.3202	940	0.4162	334	0.2673	606	0.3526	502	0.432	206	0.2973	296	0.2636	220	0.2778	54	0.259	166	0.1711	76	0.3	20
rs2032548	6	12260008	0.6714	0.6314	1.151	0.3593	1.322	9.06e-06	0.002081	0.06397	0.2908	0.00287	G	C	intergenic	HIVEP1;EDN1	dist=95009;dist=30353	.	6	12260008	9.06e-06	0.002081	0.06397	0.2908	0.00287	G	C	0.3908	934	0.4759	332	0.3439	602	0.369	496	0.4461	204	0.3151	292	0.4636	220	0.5	54	0.4518	166	0.3553	76	0.45	20
C6_32550138	6	32550138	1.323	NA	NA	2.739	-0.3724	0.007755	NA	NA	5.26e-05	0.7678	G	A	intergenic	HLA-DRB5;HLA-DRB6	dist=19851;dist=2575	.	6	32550138	0.007755	NA	NA	5.26e-05	0.7678	G	A	0.02478	928	0.03614	332	0.01846	596	0.004016	498	0	204	0.006803	294	0.07798	218	0.2037	54	0.03659	164	0	76	0	20
C6_32748894	6	32748894	0.4691	0.2773	-1.249	2.324	-0.3806	0.03518	0.357	0.37	8.05e-05	0.5248	T	G	intergenic	HLA-DQA2;MIR3135B	dist=1709;dist=1018	.	6	32748894	0.03518	0.357	0.37	8.05e-05	0.5248	T	G	0.1335	944	0.1587	334	0.1197	610	0.1255	502	0.1359	206	0.1182	296	0.1396	222	0.2778	54	0.09524	168	0.09211	76	0.05	20
rs117948146	6	44042092	1.256	1.512	-0.2269	1.079	1.222	3.24e-05	0.07076	0.916	0.009679	0.0507	G	A	ncRNA_intronic	LOC101929705	.	.	6	44042092	3.24e-05	0.07076	0.916	0.009679	0.0507	G	A	0.08102	938	0.1145	332	0.06271	606	0.01815	496	0.02941	204	0.01027	292	0.2027	222	0.3333	54	0.1607	168	0.03947	76	0.1	20
rs77219151	6	44043810	1.314	1.516	-0.2269	1.159	1.222	3.01e-05	0.07018	0.916	0.01137	0.0507	T	G	ncRNA_intronic	LOC101929705	.	.	6	44043810	3.01e-05	0.07018	0.916	0.01137	0.0507	T	G	0.07872	940	0.1108	334	0.06106	606	0.01807	498	0.02913	206	0.01027	292	0.1937	222	0.3148	54	0.1548	168	0.03947	76	0.1	20
rs6458374	6	44213578	0.7257	0.6309	1.061	0.5445	1.182	2.65e-05	0.00641	0.4453	0.1559	0.0077	T	C	intergenic	CAPN11;MYMX	dist=29177;dist=3348	.	6	44213578	2.65e-05	0.00641	0.4453	0.1559	0.0077	C	T	0.2341	944	0.3054	334	0.1951	610	0.2191	502	0.2718	206	0.1824	296	0.2703	222	0.3704	54	0.2381	168	0.03947	76	0.05	20
rs3734701	6	44217517	0.662	0.6466	2.003	0.4639	0.8763	9.22e-05	0.005316	0.2405	0.2007	0.03604	C	T	exonic	MYMX	.	.	6	44217517	9.22e-05	0.005316	0.2405	0.2007	0.03604	T	C	0.2288	944	0.2964	334	0.1918	610	0.2171	502	0.2718	206	0.1791	296	0.2703	222	0.3704	54	0.2381	168	0.02632	76	0.05	20
rs681238	6	44238108	0.6279	0.5007	1.533	0.6984	0.9137	4.47e-05	0.01235	0.1303	0.03405	0.0464	C	A	intergenic	SLC29A1;HSP90AB1	dist=3966;dist=8058	.	6	44238108	4.47e-05	0.01235	0.1303	0.03405	0.0464	A	C	0.2708	938	0.3563	334	0.2235	604	0.2964	496	0.3544	206	0.2552	290	0.2928	222	0.4444	54	0.244	168	0.09211	76	0.15	20
rs12204119	6	44241306	0.659	0.5737	1.247	0.7919	0.8356	1.49e-05	0.003745	0.1089	0.02068	0.06336	C	T	intergenic	SLC29A1;HSP90AB1	dist=7164;dist=4860	.	6	44241306	1.49e-05	0.003745	0.1089	0.02068	0.06336	T	C	0.3017	918	0.3963	328	0.2492	590	0.3189	486	0.3861	202	0.2711	284	0.3194	216	0.4815	54	0.2654	162	0.1711	76	0.3	20
rs571335	6	44242303	0.7414	0.7025	2.909	0.5457	1.326	1.74e-05	0.001567	0.05529	0.1334	0.01951	A	T	intergenic	SLC29A1;HSP90AB1	dist=8161;dist=3863	.	6	44242303	1.74e-05	0.001567	0.05529	0.1334	0.01951	T	A	0.2059	942	0.2844	334	0.1628	608	0.23	500	0.2961	206	0.1837	294	0.2432	222	0.3519	54	0.2083	168	0.03947	76	0.1	20
rs324128	6	44244574	0.6783	0.537	2.28	0.9426	0.7283	5.14e-06	0.005686	0.02831	0.006329	0.07084	C	T	intergenic	SLC29A1;HSP90AB1	dist=10432;dist=1592	.	6	44244574	5.14e-06	0.005686	0.02831	0.006329	0.07084	T	C	0.3132	942	0.4102	334	0.2599	608	0.32	500	0.3835	206	0.2755	294	0.3108	222	0.5	54	0.25	168	0.2895	76	0.45	20
rs324130	6	44244951	0.7236	0.535	3.796	0.8491	0.9706	2.12e-06	0.006997	0.03516	0.0128	0.02701	C	T	intergenic	SLC29A1;HSP90AB1	dist=10809;dist=1215	.	6	44244951	2.12e-06	0.006997	0.03516	0.0128	0.02701	T	C	0.2771	942	0.3743	334	0.2237	608	0.284	500	0.3447	206	0.2415	294	0.2883	222	0.463	54	0.2321	168	0.2237	76	0.4	20
rs324131	6	44246956	0.6588	0.5186	1.157	0.8491	0.7205	1.75e-05	0.009476	0.206	0.0128	0.087	C	T	intronic	HSP90AB1	.	.	6	44246956	1.75e-05	0.009476	0.206	0.0128	0.087	T	C	0.2722	944	0.3593	334	0.2246	610	0.2829	502	0.3398	206	0.2432	296	0.2883	222	0.463	54	0.2321	168	0.09211	76	0.15	20
rs34124063	6	44248047	0.6289	0.5636	0.6035	0.884	0.5188	2.75e-05	0.004277	0.4188	0.0114	0.1888	T	A	UTR5	HSP90AB1	NM_001371238.1:c.-583T>A	.	6	44248047	2.75e-05	0.004277	0.4188	0.0114	0.1888	A	T	0.3047	942	0.3922	334	0.2566	608	0.314	500	0.3786	206	0.2687	294	0.3063	222	0.4815	54	0.25	168	0.1579	76	0.2	20
rs34789835	6	44248048	0.6289	0.5636	0.6035	0.884	0.5188	2.75e-05	0.004277	0.4188	0.0114	0.1888	C	G	UTR5	HSP90AB1	NM_001371238.1:c.-582C>G	.	6	44248048	2.75e-05	0.004277	0.4188	0.0114	0.1888	G	C	0.3047	942	0.3922	334	0.2566	608	0.314	500	0.3786	206	0.2687	294	0.3063	222	0.4815	54	0.25	168	0.1579	76	0.2	20
rs34451930	6	44248049	0.6289	0.5636	0.6035	0.884	0.5188	2.75e-05	0.004277	0.4188	0.0114	0.1888	G	A	UTR5	HSP90AB1	NM_001371238.1:c.-581G>A	.	6	44248049	2.75e-05	0.004277	0.4188	0.0114	0.1888	A	G	0.3047	942	0.3922	334	0.2566	608	0.314	500	0.3786	206	0.2687	294	0.3063	222	0.4815	54	0.25	168	0.1579	76	0.2	20
rs13296	6	44250383	0.6751	0.5568	0.983	0.9252	0.6923	7.49e-06	0.005131	0.1698	0.007354	0.08822	G	A	exonic	HSP90AB1	.	.	6	44250383	7.49e-06	0.005131	0.1698	0.007354	0.08822	A	G	0.3085	940	0.4012	334	0.2574	606	0.3112	498	0.3738	206	0.2671	292	0.3108	222	0.5	54	0.25	168	0.2105	76	0.3	20
rs504697	6	44252339	0.6536	0.5372	0.759	0.8491	0.7129	1.36e-05	0.007169	0.2539	0.0128	0.07872	C	T	intronic	HSP90AB1	.	.	6	44252339	1.36e-05	0.007169	0.2539	0.0128	0.07872	T	C	0.2834	942	0.3713	334	0.2352	608	0.28	500	0.3398	206	0.2381	294	0.2883	222	0.463	54	0.2321	168	0.2237	76	0.3	20
C6_M48824	6	44254424	0.719	0.6261	0.759	0.9331	0.7129	2.72e-06	0.002233	0.2539	0.007695	0.07872	C	CTG	UTR3	SLC35B2	NM_001286510.2:c.*282G>CAG;NM_001286520.2:c.*282G>CAG;NM_001286517.2:c.*282G>CAG;NM_001286519.1:c.*282G>CAG;NM_178148.4:c.*282G>CAG;NM_001286513.1:c.*282G>CAG;NM_001286512.1:c.*282G>CAG;NM_001286511.1:c.*282G>CAG;NM_001286509.2:c.*282G>CAG	rs35131506	6	44254424	2.72e-06	0.002233	0.2539	0.007695	0.07872	C	CTG	0.2749	942	0.3683	334	0.2237	608	0.266	500	0.335	206	0.2177	294	0.2838	222	0.463	54	0.2262	168	0.2237	76	0.3	20
rs9448178	6	77716114	0.38	0.9178	-0.8857	-0.3455	-0.07958	0.01759	5.71e-05	0.3973	0.3461	0.8476	G	C	intronic	MEI4	.	.	6	77716114	0.01759	5.71e-05	0.3973	0.3461	0.8476	G	C	0.2781	942	0.3204	334	0.2549	608	0.246	500	0.3398	206	0.1803	294	0.3514	222	0.2963	54	0.369	168	0.1579	76	0.15	20
rs1564653	6	77727407	0.3056	0.9027	-0.4417	-0.3614	-0.1635	0.04881	6.4e-05	0.525	0.3019	0.6968	G	A	intronic	MEI4	.	.	6	77727407	0.04881	6.4e-05	0.525	0.3019	0.6968	G	A	0.3259	942	0.3533	334	0.3109	608	0.262	500	0.3544	206	0.1973	294	0.4279	222	0.3519	54	0.4524	168	0.2895	76	0.25	20
rs1564655	6	77728281	0.3074	0.9027	-0.3349	-0.3614	-0.1483	0.04718	6.4e-05	0.6138	0.3019	0.7276	G	T	intronic	MEI4	.	.	6	77728281	0.04718	6.4e-05	0.6138	0.3019	0.7276	G	T	0.333	940	0.3593	334	0.3185	606	0.262	500	0.3544	206	0.1973	294	0.4279	222	0.3519	54	0.4524	168	0.3421	76	0.3	20
rs6939080	6	77730124	0.3169	0.9228	-0.4417	-0.348	-0.1635	0.04095	4.6e-05	0.525	0.3194	0.6968	C	T	intronic	MEI4	.	.	6	77730124	0.04095	4.6e-05	0.525	0.3194	0.6968	C	T	0.3245	940	0.3533	334	0.3086	606	0.26	500	0.3544	206	0.1939	294	0.4273	220	0.3519	54	0.4518	166	0.2895	76	0.25	20
rs9352520	6	77735279	0.4093	1.016	NA	-0.2689	0.03111	0.01178	2.69e-05	NA	0.4607	0.9409	T	C	intronic	MEI4	.	.	6	77735279	0.01178	2.69e-05	NA	0.4607	0.9409	T	C	0.3093	886	0.3522	318	0.2852	568	0.2436	468	0.3454	194	0.1715	274	0.4029	206	0.3462	52	0.4221	154	0.2778	72	0.2778	18
rs9361265	6	77735329	0.3043	0.9761	NA	-0.6788	0.02208	0.06161	6.35e-05	NA	0.08071	0.9574	G	A	intronic	MEI4	.	.	6	77735329	0.06161	6.35e-05	NA	0.08071	0.9574	G	A	0.3065	894	0.3344	314	0.2914	580	0.2394	472	0.3333	192	0.175	280	0.4104	212	0.3	50	0.4444	162	0.2714	70	0.2778	18
rs4708363	6	77737184	0.3055	0.9027	-0.3349	-0.3614	-0.1597	0.04858	6.4e-05	0.6138	0.3019	0.7087	A	G	intronic	MEI4	.	.	6	77737184	0.04858	6.4e-05	0.6138	0.3019	0.7087	A	G	0.3333	942	0.3593	334	0.3191	608	0.262	500	0.3544	206	0.1973	294	0.4279	222	0.3519	54	0.4524	168	0.3421	76	0.3	20
rs9448188	6	77737604	0.2867	0.9027	-0.3349	-0.4411	-0.1597	0.06344	6.4e-05	0.6138	0.2116	0.7087	A	G	intronic	MEI4	.	.	6	77737604	0.06344	6.4e-05	0.6138	0.2116	0.7087	A	G	0.3319	940	0.3563	334	0.3185	606	0.262	500	0.3544	206	0.1973	294	0.4227	220	0.3333	54	0.4518	166	0.3421	76	0.3	20
rs7741909	6	77740924	0.2868	0.9027	-0.4417	-0.4426	-0.1635	0.06386	6.4e-05	0.525	0.2118	0.6968	C	G	intronic	MEI4	.	.	6	77740924	0.06386	6.4e-05	0.525	0.2118	0.6968	C	G	0.3248	942	0.3503	334	0.3109	608	0.262	500	0.3544	206	0.1973	294	0.4234	222	0.3333	54	0.4524	168	0.2895	76	0.25	20
rs7763023	6	77744637	0.2915	0.9147	-0.3349	-0.4426	-0.1597	0.0594	5.45e-05	0.6138	0.2118	0.7087	C	G	intronic	MEI4	.	.	6	77744637	0.0594	5.45e-05	0.6138	0.2118	0.7087	C	G	0.3319	940	0.3563	334	0.3185	606	0.261	498	0.3544	206	0.1952	292	0.4234	222	0.3333	54	0.4524	168	0.3421	76	0.3	20
rs4461698	6	77749152	0.2867	0.9027	-0.3349	-0.4426	-0.1597	0.06355	6.4e-05	0.6138	0.2118	0.7087	G	A	intronic	MEI4	.	.	6	77749152	0.06355	6.4e-05	0.6138	0.2118	0.7087	G	A	0.3323	942	0.3563	334	0.3191	608	0.262	500	0.3544	206	0.1973	294	0.4234	222	0.3333	54	0.4524	168	0.3421	76	0.3	20
rs1483046	6	77760382	0.2716	0.9065	-0.4176	-0.4847	-0.1785	0.07859	6.36e-05	0.5059	0.1844	0.6837	A	G	intronic	MEI4	.	.	6	77760382	0.07859	6.36e-05	0.5059	0.1844	0.6837	A	G	0.3337	932	0.3545	330	0.3223	602	0.2621	496	0.3544	206	0.1966	290	0.4227	220	0.3269	52	0.4524	168	0.3684	76	0.3	20
rs1483047	6	77760614	0.3039	0.9027	-0.631	-0.3614	-0.05172	0.04907	6.4e-05	0.3458	0.3019	0.9032	C	T	intronic	MEI4	.	.	6	77760614	0.04907	6.4e-05	0.3458	0.3019	0.9032	C	T	0.3301	942	0.3563	334	0.3158	608	0.262	500	0.3544	206	0.1973	294	0.4279	222	0.3519	54	0.4524	168	0.3289	76	0.25	20
rs1483052	6	77762474	0.291	0.8657	-0.631	-0.3614	-0.04237	0.05813	9.98e-05	0.3458	0.3019	0.9204	A	T	intronic	MEI4	.	.	6	77762474	0.05813	9.98e-05	0.3458	0.3019	0.9204	A	T	0.3312	942	0.3563	334	0.3174	608	0.2649	502	0.3544	206	0.2027	296	0.4279	222	0.3519	54	0.4524	168	0.3289	76	0.25	20
rs6454002	6	77763557	0.2865	0.8657	-0.2191	-0.3614	-0.2004	0.06175	9.98e-05	0.7382	0.3019	0.6286	C	T	intronic	MEI4	.	.	6	77763557	0.06175	9.98e-05	0.7382	0.3019	0.6286	C	T	0.3316	944	0.3563	334	0.318	610	0.2649	502	0.3544	206	0.2027	296	0.4279	222	0.3519	54	0.4524	168	0.3289	76	0.3	20
rs4235904	6	77772190	0.2952	0.9027	-0.4176	-0.3614	-0.1009	0.05517	6.4e-05	0.5059	0.3019	0.8107	G	A	intronic	MEI4	.	.	6	77772190	0.05517	6.4e-05	0.5059	0.3019	0.8107	G	A	0.3348	938	0.3593	334	0.3212	604	0.262	500	0.3544	206	0.1973	294	0.4279	222	0.3519	54	0.4524	168	0.3684	76	0.3	20
rs7764740	6	77788516	0.2752	0.9027	-0.3349	-0.4426	-0.199	0.07353	6.4e-05	0.6138	0.2118	0.6343	C	T	intronic	MEI4	.	.	6	77788516	0.07353	6.4e-05	0.6138	0.2118	0.6343	C	T	0.3301	942	0.3533	334	0.3174	608	0.262	500	0.3544	206	0.1973	294	0.4234	222	0.3333	54	0.4524	168	0.3421	76	0.3	20
rs4708368	6	77788937	0.3089	0.8932	-0.579	-0.3259	-0.09559	0.04667	7.7e-05	0.4154	0.3585	0.8179	C	T	intronic	MEI4	.	.	6	77788937	0.04667	7.7e-05	0.4154	0.3585	0.8179	C	T	0.3248	936	0.3533	334	0.309	602	0.2631	498	0.3544	206	0.1986	292	0.422	218	0.3519	54	0.4451	164	0.3026	76	0.25	20
rs367254	6	111595470	0.3234	0.7868	-0.2641	1.013	0.396	0.02425	6.27e-05	0.7262	0.005939	0.3155	A	C	ncRNA_intronic	TRAF3IP2-AS1	.	.	6	111595470	0.02425	6.27e-05	0.7262	0.005939	0.3155	C	A	0.4618	942	0.494	334	0.4441	608	0.406	500	0.4854	206	0.3299	294	0.4865	222	0.3333	54	0.4286	168	0.3553	76	0.35	20
rs12524199	6	111621018	1.593	3.254	1.997	0.2866	1.82	8.21e-05	0.008031	0.08122	0.8161	0.004621	T	C	intergenic	TRAF3IP2;FYN	dist=14744;dist=39314	.	6	111621018	8.21e-05	0.008031	0.08122	0.8161	0.004621	T	C	0.04352	942	0.07485	334	0.02632	608	0.016	500	0.03398	206	0.003401	294	0.01802	222	0.01852	54	0.01786	168	0.1053	76	0.2	20
rs12524233	6	111621101	1.566	3.254	1.083	1.046	1.82	8.83e-05	0.008031	0.3348	0.2875	0.004621	A	G	intergenic	TRAF3IP2;FYN	dist=14827;dist=39231	.	6	111621101	8.83e-05	0.008031	0.3348	0.2875	0.004621	A	G	0.04352	942	0.07485	334	0.02632	608	0.016	500	0.03398	206	0.003401	294	0.02252	222	0.03704	54	0.01786	168	0.09211	76	0.15	20
rs9482524	6	124254097	1.516	2.132	0.8033	1.948	1.912	3.83e-05	0.08718	0.4079	0.004918	0.00416	T	C	intronic	NKAIN2	.	.	6	124254097	3.83e-05	0.08718	0.4079	0.004918	0.00416	T	C	0.05191	944	0.08084	334	0.03607	610	0.007968	502	0.01456	206	0.003378	296	0.05405	222	0.1296	54	0.02976	168	0.1974	76	0.2	20
rs6899650	6	127985466	-0.6314	-0.6319	-1.015	-0.8014	0.4224	8.83e-05	0.002117	0.2201	0.03088	0.3573	C	T	intronic	PTPRK	.	.	6	127985466	8.83e-05	0.002117	0.2201	0.03088	0.3573	C	T	0.38	942	0.2994	334	0.4243	608	0.362	500	0.2864	206	0.415	294	0.3694	222	0.2407	54	0.4107	168	0.3026	76	0.2	20
rs3903662	6	127991698	-0.6321	-0.5918	-1.015	-0.8949	0.5285	9.5e-05	0.004187	0.2201	0.01799	0.2449	A	G	intronic	PTPRK	.	.	6	127991698	9.5e-05	0.004187	0.2201	0.01799	0.2449	A	G	0.3766	940	0.2964	334	0.4208	606	0.356	500	0.2864	206	0.4048	294	0.3649	222	0.2222	54	0.4107	168	0.3026	76	0.2	20
rs7764644	6	134108317	-0.6634	-0.8024	-0.7894	0.2056	-1.674	2.24e-05	7.83e-05	0.3942	0.5574	0.003211	A	T	intergenic	SLC2A12;HMGA1P7	dist=55693;dist=5654	.	6	134108317	2.24e-05	7.83e-05	0.3942	0.5574	0.003211	A	T	0.3684	942	0.2784	334	0.4178	608	0.384	500	0.2767	206	0.4592	294	0.3423	222	0.3519	54	0.3393	168	0.4342	76	0.35	20
rs9321425	6	134108350	-0.6433	-0.7994	-0.3096	-0.01889	-1.482	2.75e-05	7.1e-05	0.6718	0.9596	0.004052	A	C	intergenic	SLC2A12;HMGA1P7	dist=55726;dist=5621	.	6	134108350	2.75e-05	7.1e-05	0.6718	0.9596	0.004052	A	C	0.362	942	0.2874	334	0.403	608	0.418	500	0.3155	206	0.4898	294	0.3018	222	0.2963	54	0.3036	168	0.3026	76	0.3	20
rs57068248	6	134647715	2.351	1.336	2.318	2.899	NA	4.67e-05	0.3047	0.0183	0.01134	NA	G	A	intergenic	LOC101928304;ALDH8A1	dist=107710;dist=269678	.	6	134647715	4.67e-05	0.3047	0.0183	0.01134	NA	G	A	0.02335	942	0.04491	334	0.01151	608	0.006	500	0.009709	206	0.003401	294	0.02703	222	0.09259	54	0.005952	168	0.1447	76	0.3	20
rs6908303	6	134648556	2.351	1.336	2.318	2.899	NA	4.67e-05	0.3047	0.0183	0.01134	NA	C	T	intergenic	LOC101928304;ALDH8A1	dist=108551;dist=268837	.	6	134648556	4.67e-05	0.3047	0.0183	0.01134	NA	C	T	0.02335	942	0.04491	334	0.01151	608	0.006	500	0.009709	206	0.003401	294	0.02703	222	0.09259	54	0.005952	168	0.1447	76	0.3	20
rs143708464	6	134649617	2.527	1.336	2.619	2.899	NA	3.33e-05	0.3047	0.01049	0.01134	NA	T	C	intergenic	LOC101928304;ALDH8A1	dist=109612;dist=267776	.	6	134649617	3.33e-05	0.3047	0.01049	0.01134	NA	T	C	0.02123	942	0.04192	334	0.009868	608	0.006	500	0.009709	206	0.003401	294	0.02703	222	0.09259	54	0.005952	168	0.1184	76	0.25	20
rs75140189	6	134650146	2.53	1.354	2.619	2.899	NA	3.26e-05	0.2984	0.01049	0.01134	NA	T	C	intergenic	LOC101928304;ALDH8A1	dist=110141;dist=267247	.	6	134650146	3.26e-05	0.2984	0.01049	0.01134	NA	T	C	0.02128	940	0.04217	332	0.009868	608	0.006024	498	0.009804	204	0.003401	294	0.02703	222	0.09259	54	0.005952	168	0.1184	76	0.25	20
rs10046349	6	139159025	0.4861	1.926	NA	0.3998	-0.1318	0.03205	5.96e-05	NA	0.4311	0.7708	G	A	intronic	HECA	.	.	6	139159025	0.03205	5.96e-05	NA	0.4311	0.7708	G	A	0.1111	936	0.1295	332	0.101	604	0.06225	498	0.1127	204	0.02721	294	0.1147	218	0.1296	54	0.1098	164	0.1316	76	0	20
rs1327669	6	146728763	0.6778	0.4414	3.649	1.42	0.00757	0.0001069	0.04818	0.009465	0.001076	0.9886	C	T	intronic	ADGB	.	.	6	146728763	0.0001069	0.04818	0.009465	0.001076	0.9886	C	T	0.2293	942	0.3054	334	0.1875	608	0.252	500	0.2961	206	0.2211	294	0.2252	222	0.3889	54	0.1726	168	0.1974	76	0.5	20
rs12196020	6	146753273	0.6823	0.49	2.319	1.272	0.1783	7.03e-05	0.02675	0.0168	0.002982	0.735	A	G	intronic	ADGB	.	.	6	146753273	7.03e-05	0.02675	0.0168	0.002982	0.735	A	G	0.2619	924	0.3333	330	0.2222	594	0.2641	496	0.3137	204	0.2295	292	0.2406	212	0.3846	52	0.1938	160	0.4474	76	0.25	20
rs7770653	6	146756729	0.6977	0.4803	2.319	1.308	0.2173	4.41e-05	0.0291	0.0168	0.002147	0.6803	T	C	intronic	ADGB	.	.	6	146756729	4.41e-05	0.0291	0.0168	0.002147	0.6803	T	C	0.2585	940	0.3323	334	0.2178	606	0.262	500	0.3107	206	0.2279	294	0.2364	220	0.3889	54	0.1867	166	0.4474	76	0.25	20
rs643868	6	149308857	-0.344	0.7825	1.793	0.5483	-0.7828	0.01852	8.77e-05	0.0367	0.1248	0.08668	C	T	intronic	TAB2	.	.	6	149308857	0.01852	8.77e-05	0.0367	0.1248	0.08668	T	C	0.4926	942	0.4461	334	0.4819	608	0.484	500	0.4126	206	0.4116	294	0.473	222	0.4259	54	0.4405	168	0.4868	76	0.35	20
rs527079	6	149308878	-0.3693	-0.813	1.132	0.5483	-0.7828	0.01191	5.28e-05	0.0861	0.1248	0.08668	T	G	intronic	TAB2	.	.	6	149308878	0.01191	5.28e-05	0.0861	0.1248	0.08668	G	T	0.4735	944	0.4281	334	0.4984	610	0.498	502	0.3981	206	0.4257	296	0.473	222	0.4259	54	0.4405	168	0.3421	76	0.5	20
rs799389	6	149309032	0.4459	0.8649	-1.011	-0.5474	1.098	0.00202	1.87e-05	0.1442	0.1253	0.01587	G	A	intronic	TAB2	.	.	6	149309032	0.00202	1.87e-05	0.1442	0.1253	0.01587	G	A	0.4289	942	0.494	334	0.3931	608	0.426	500	0.4612	206	0.3469	294	0.4054	222	0.3148	54	0.4345	168	0.4605	76	0.35	20
rs576897	6	149309177	0.4421	0.8649	-1.549	-0.5474	1.102	0.002318	1.87e-05	0.05506	0.1253	0.01511	G	A	intronic	TAB2	.	.	6	149309177	0.002318	1.87e-05	0.05506	0.1253	0.01511	G	A	0.4266	940	0.491	334	0.3911	606	0.426	500	0.4612	206	0.3469	294	0.4054	222	0.3148	54	0.4345	168	0.4342	76	0.3	20
rs576227	6	149309199	0.4421	0.8649	-1.549	-0.5474	1.102	0.002318	1.87e-05	0.05506	0.1253	0.01511	G	A	intronic	TAB2	.	.	6	149309199	0.002318	1.87e-05	0.05506	0.1253	0.01511	G	A	0.4266	940	0.491	334	0.3911	606	0.426	500	0.4612	206	0.3469	294	0.4054	222	0.3148	54	0.4345	168	0.4342	76	0.3	20
rs530516	6	149309212	0.4383	0.8649	-1.549	-0.5731	1.102	0.002542	1.87e-05	0.05506	0.1106	0.01511	A	G	intronic	TAB2	.	.	6	149309212	0.002542	1.87e-05	0.05506	0.1106	0.01511	A	G	0.4275	938	0.491	334	0.3924	604	0.426	500	0.4612	206	0.3469	294	0.4091	220	0.3148	54	0.4398	166	0.4342	76	0.3	20
rs57195972	6	149309272	0.4383	0.8649	-1.549	-0.5731	1.102	0.002542	1.87e-05	0.05506	0.1106	0.01511	T	TTTTACATATAC	intronic	TAB2	.	rs145385442	6	149309272	0.002542	1.87e-05	0.05506	0.1106	0.01511	TTTTACATATAC	T	0.4275	938	0.491	334	0.3924	604	0.426	500	0.4612	206	0.3469	294	0.4091	220	0.3148	54	0.4398	166	0.4342	76	0.3	20
rs532563	6	149309460	0.4411	0.8649	-1.549	-0.5474	1.098	0.002378	1.87e-05	0.05506	0.1253	0.01587	G	A	intronic	TAB2	.	.	6	149309460	0.002378	1.87e-05	0.05506	0.1253	0.01587	G	A	0.4278	942	0.494	334	0.3914	608	0.426	500	0.4612	206	0.3469	294	0.4054	222	0.3148	54	0.4345	168	0.4342	76	0.3	20
rs545863	6	149310206	-0.4213	0.8192	0.182	0.5592	-0.8599	0.004226	4.32e-05	0.7608	0.1161	0.06393	C	T	intronic	TAB2	.	.	6	149310206	0.004226	4.32e-05	0.7608	0.1161	0.06393	T	C	0.483	942	0.4311	334	0.4885	608	0.49	500	0.4029	206	0.415	294	0.4685	222	0.4259	54	0.4345	168	0.3947	76	0.45	20
rs560917	6	149310254	0.4436	0.8649	-1.171	-0.5663	1.097	0.002335	1.87e-05	0.1175	0.1144	0.01703	A	T	intronic	TAB2	.	.	6	149310254	0.002335	1.87e-05	0.1175	0.1144	0.01703	A	T	0.431	942	0.494	334	0.3964	608	0.426	500	0.4612	206	0.3469	294	0.4099	222	0.3148	54	0.4405	168	0.4605	76	0.35	20
rs543973	6	149310420	0.4249	0.8469	-1.549	-0.6176	1.098	0.003387	2.48e-05	0.05506	0.09241	0.01587	C	T	intronic	TAB2	.	.	6	149310420	0.003387	2.48e-05	0.05506	0.09241	0.01587	C	T	0.4287	940	0.491	332	0.3947	608	0.4283	502	0.4612	206	0.3514	296	0.4083	218	0.3077	52	0.4398	166	0.4342	76	0.3	20
rs562677	6	149310425	0.4265	0.8469	-1.549	-0.5591	1.098	0.003212	2.48e-05	0.05506	0.1173	0.01587	A	G	intronic	TAB2	.	.	6	149310425	0.003212	2.48e-05	0.05506	0.1173	0.01587	A	G	0.4289	942	0.491	334	0.3947	608	0.4283	502	0.4612	206	0.3514	296	0.4091	220	0.3148	54	0.4398	166	0.4342	76	0.3	20
rs543910	6	149310443	0.4297	0.8469	-1.549	-0.5474	1.098	0.00297	2.48e-05	0.05506	0.1253	0.01587	C	T	intronic	TAB2	.	.	6	149310443	0.00297	2.48e-05	0.05506	0.1253	0.01587	C	T	0.428	944	0.491	334	0.3934	610	0.4283	502	0.4612	206	0.3514	296	0.4054	222	0.3148	54	0.4345	168	0.4342	76	0.3	20
C6_149310575	6	149310575	0.458	0.8536	-1.382	-0.4869	1.144	0.001656	2.3e-05	0.08468	0.1678	0.01393	T	TAA	intronic	TAB2	.	rs200700941	6	149310575	0.001656	2.3e-05	0.08468	0.1678	0.01393	TAA	T	0.4234	940	0.491	332	0.3865	608	0.428	500	0.4608	204	0.3514	296	0.4	220	0.3148	54	0.4277	166	0.4079	76	0.3	20
rs542194	6	149310622	0.4219	0.8259	-1.549	-0.4889	1.098	0.003421	3.63e-05	0.05506	0.1629	0.01587	C	T	intronic	TAB2	.	.	6	149310622	0.003421	3.63e-05	0.05506	0.1629	0.01587	C	T	0.4266	940	0.491	332	0.3914	608	0.426	500	0.4657	204	0.3514	296	0.4	220	0.3148	54	0.4277	166	0.4342	76	0.3	20
rs652070	6	149310873	0.4297	0.8469	-1.549	-0.5474	1.098	0.00297	2.48e-05	0.05506	0.1253	0.01587	G	C	intronic	TAB2	.	.	6	149310873	0.00297	2.48e-05	0.05506	0.1253	0.01587	G	C	0.429	944	0.494	334	0.3934	610	0.4283	502	0.4612	206	0.3514	296	0.4054	222	0.3148	54	0.4345	168	0.4342	76	0.3	20
rs702359	6	149311054	0.4411	0.8649	-1.549	-0.5474	1.098	0.002378	1.87e-05	0.05506	0.1253	0.01587	G	A	intronic	TAB2	.	.	6	149311054	0.002378	1.87e-05	0.05506	0.1253	0.01587	G	A	0.4268	942	0.491	334	0.3914	608	0.426	500	0.4612	206	0.3469	294	0.4054	222	0.3148	54	0.4345	168	0.4342	76	0.3	20
rs482388	6	149311386	0.4373	0.8649	-1.549	-0.5731	1.098	0.002608	1.87e-05	0.05506	0.1106	0.01587	A	G	intronic	TAB2	.	.	6	149311386	0.002608	1.87e-05	0.05506	0.1106	0.01587	A	G	0.4287	940	0.494	334	0.3927	606	0.426	500	0.4612	206	0.3469	294	0.4091	220	0.3148	54	0.4398	166	0.4342	76	0.3	20
rs485360	6	149312189	0.4297	0.8469	-1.549	-0.5474	1.098	0.00297	2.48e-05	0.05506	0.1253	0.01587	G	T	intronic	TAB2	.	.	6	149312189	0.00297	2.48e-05	0.05506	0.1253	0.01587	G	T	0.429	944	0.494	334	0.3934	610	0.4283	502	0.4612	206	0.3514	296	0.4054	222	0.3148	54	0.4345	168	0.4342	76	0.3	20
rs545750	6	149312356	0.4348	0.8649	-1.549	-0.5474	1.063	0.002781	1.87e-05	0.05506	0.1253	0.02111	T	A	intronic	TAB2	.	.	6	149312356	0.002781	1.87e-05	0.05506	0.1253	0.02111	T	A	0.4287	940	0.494	334	0.3927	606	0.426	500	0.4612	206	0.3469	294	0.4054	222	0.3148	54	0.4345	168	0.4342	76	0.3	20
rs479676	6	149312820	0.4333	0.8593	-1.549	-0.5474	1.093	0.002708	1.77e-05	0.05506	0.1253	0.01787	C	T	intronic	TAB2	.	.	6	149312820	0.002708	1.77e-05	0.05506	0.1253	0.01787	C	T	0.4311	944	0.497	334	0.3951	610	0.4303	502	0.4563	206	0.3514	296	0.4054	222	0.3148	54	0.4345	168	0.4342	76	0.3	20
rs573148	6	149312981	0.3929	0.8045	-3.574	-0.5446	1.166	0.00598	4.76e-05	0.03269	0.1245	0.01122	G	A	intronic	TAB2	.	.	6	149312981	0.00598	4.76e-05	0.03269	0.1245	0.01122	G	A	0.4136	938	0.479	334	0.3775	604	0.4257	498	0.466	206	0.3493	292	0.3919	222	0.2963	54	0.4226	168	0.3026	76	0.15	20
rs149896646	6	165765339	0.956	0.8648	NA	-0.5366	2.336	9.21e-05	0.00315	NA	0.5252	0.003813	A	G	intergenic	PDE10A;LINC00473	dist=102098;dist=158709	.	6	165765339	9.21e-05	0.00315	NA	0.5252	0.003813	A	G	0.09701	938	0.1566	332	0.06436	606	0.131	496	0.1912	204	0.08904	292	0.05405	222	0.03704	54	0.05952	168	0.02632	76	0.1	20
C7_6981300	7	6981300	-0.8899	-0.9739	-1.021	-0.4441	-0.9624	2.36e-05	0.0004372	0.2357	0.3558	0.09305	T	A	intergenic	CCZ1B;MIR3683	dist=155025;dist=85664	.	7	6981300	2.36e-05	0.0004372	0.2357	0.3558	0.09305	T	A	0.2919	942	0.2365	334	0.3224	608	0.302	500	0.2379	206	0.3469	294	0.2387	222	0.2037	54	0.25	168	0.2763	76	0.15	20
C7_6981323	7	6981323	-1.008	-1.142	-0.6825	-0.5766	-0.9668	1.88e-06	3.98e-05	0.4211	0.2468	0.08343	T	C	intergenic	CCZ1B;MIR3683	dist=155048;dist=85641	.	7	6981323	1.88e-06	3.98e-05	0.4211	0.2468	0.08343	T	C	0.2792	942	0.2126	334	0.3158	608	0.29	500	0.2136	206	0.3435	294	0.2342	222	0.1852	54	0.25	168	0.25	76	0.15	20
C7_6981334	7	6981334	-0.997	-1.239	-0.4508	-0.1973	-1.135	2.45e-06	8.83e-06	0.5941	0.6796	0.03911	A	G	intergenic	CCZ1B;MIR3683	dist=155059;dist=85630	.	7	6981334	2.45e-06	8.83e-06	0.5941	0.6796	0.03911	A	G	0.2558	942	0.1856	334	0.2944	608	0.264	500	0.1748	206	0.3265	294	0.2207	222	0.2037	54	0.2262	168	0.2237	76	0.15	20
rs6947741	7	13173083	0.6155	0.6959	0.1201	1.277	0.07753	0.0001016	0.001078	0.8677	0.00308	0.8288	C	A	intergenic	ARL4A;ETV1	dist=482125;dist=718148	.	7	13173083	0.0001016	0.001078	0.8677	0.00308	0.8288	C	A	0.3779	942	0.4431	334	0.3421	608	0.3247	502	0.3981	206	0.2736	296	0.3964	222	0.4444	54	0.3452	168	0.4868	76	0.5	20
rs6948593	7	13173306	0.6297	0.7701	0.2278	1.22	0.04933	8.5e-05	0.0004054	0.7442	0.005036	0.8911	A	G	intergenic	ARL4A;ETV1	dist=482348;dist=717925	.	7	13173306	8.5e-05	0.0004054	0.7442	0.005036	0.8911	A	G	0.3774	930	0.4428	332	0.3411	598	0.3219	494	0.402	204	0.2655	290	0.3909	220	0.463	54	0.3434	166	0.4737	76	0.5	20
rs10046588	7	13180323	0.6182	0.7265	0.2278	1.222	0.1133	9.38e-05	0.0006832	0.7442	0.004979	0.7496	A	G	intergenic	ARL4A;ETV1	dist=489365;dist=710908	.	7	13180323	9.38e-05	0.0006832	0.7442	0.004979	0.7496	A	G	0.3779	942	0.4431	334	0.3421	608	0.326	500	0.4029	206	0.2721	294	0.3919	222	0.463	54	0.3452	168	0.4737	76	0.5	20
rs758400	7	13180528	0.6109	0.7265	0.2278	1.222	0.07753	0.0001167	0.0006832	0.7442	0.004979	0.8288	A	G	intergenic	ARL4A;ETV1	dist=489570;dist=710703	.	7	13180528	0.0001167	0.0006832	0.7442	0.004979	0.8288	A	G	0.3787	940	0.4431	334	0.3432	606	0.326	500	0.4029	206	0.2721	294	0.3919	222	0.463	54	0.3452	168	0.4737	76	0.5	20
rs35489469	7	13200956	0.6231	0.7065	0.3694	1.145	-0.05449	7.93e-05	0.0008925	0.5521	0.008737	0.8843	A	G	intergenic	ARL4A;ETV1	dist=509998;dist=690275	.	7	13200956	7.93e-05	0.0008925	0.5521	0.008737	0.8843	A	G	0.3453	944	0.4132	334	0.3082	610	0.2988	502	0.3738	206	0.2466	296	0.4189	222	0.4444	54	0.375	168	0.3158	76	0.4	20
rs725435	7	13201433	0.6098	0.6969	0.3694	1.145	-0.1694	0.0001058	0.0008845	0.5521	0.008737	0.6615	A	G	intergenic	ARL4A;ETV1	dist=510475;dist=689798	.	7	13201433	0.0001058	0.0008845	0.5521	0.008737	0.6615	A	G	0.3546	942	0.4222	334	0.3174	608	0.312	500	0.3883	206	0.2585	294	0.4189	222	0.4444	54	0.375	168	0.3158	76	0.4	20
rs2097710	7	19039599	2.352	2.495	1.769	NA	NA	6.76e-05	0.001276	0.1128	NA	NA	C	T	intergenic	HDAC9;TWIST1	dist=37185;dist=75869	.	7	19039599	6.76e-05	0.001276	0.1128	NA	NA	T	C	0.02442	942	0.05389	334	0.008224	608	0.032	500	0.06796	206	0.006803	294	0.004505	222	0.01852	54	0	168	0.07895	76	0.15	20
rs2007271	7	24855956	-0.4638	-0.833	-1.065	0.05894	1.055	0.004642	9.22e-05	0.2132	0.9014	0.02524	T	C	intronic	OSBPL3	.	.	7	24855956	0.004642	9.22e-05	0.2132	0.9014	0.02524	C	T	0.3199	944	0.2814	334	0.341	610	0.3924	502	0.2961	206	0.4595	296	0.1892	222	0.1852	54	0.1905	168	0.3289	76	0.2	20
rs61413450	7	29683271	0.93	1.409	NA	-1.12	0.248	6.05e-05	6.61e-06	NA	0.2798	0.7455	A	AAAAGAT	ncRNA_intronic	LOC646762	.	.	7	29683271	6.05e-05	6.61e-06	NA	0.2798	0.7455	A	AAAAGAT	0.1062	904	0.1646	316	0.07483	588	0.1356	472	0.224	192	0.075	280	0.05455	220	0.01923	52	0.06548	168	0.1216	74	0.2	20
rs56079969	7	30092381	0.6925	1.528	1.785	-0.0801	-0.4525	0.005637	8.35e-05	0.2969	0.9093	0.4053	G	C	intronic	PLEKHA8	.	.	7	30092381	0.005637	8.35e-05	0.2969	0.9093	0.4053	G	C	0.08369	944	0.1228	334	0.0623	610	0.08167	502	0.1408	206	0.04054	296	0.06306	222	0.05556	54	0.06548	168	0.02632	76	0.05	20
rs73092109	7	36068432	0.9513	0.6963	1.92	2.383	0.9604	9.14e-05	0.01524	0.2403	0.0007148	0.224	C	G	intergenic	SEPTIN7;LOC101928618	dist=161322;dist=26878	.	7	36068432	9.14e-05	0.01524	0.2403	0.0007148	0.224	C	G	0.09979	942	0.1557	334	0.06908	608	0.1335	502	0.1748	206	0.1047	296	0.06306	222	0.1852	54	0.02381	168	0.02632	76	0.05	20
rs10279199	7	38603133	-0.6758	-0.6028	-0.3675	1.287	-0.8904	7.04e-05	0.00552	0.6465	0.006094	0.06396	C	T	intronic	AMPH	.	.	7	38603133	7.04e-05	0.00552	0.6465	0.006094	0.06396	T	C	0.4766	942	0.3713	334	0.4655	608	0.358	500	0.2961	206	0.4014	294	0.2117	222	0.3333	54	0.1726	168	0.4079	76	0.45	20
rs11379143	7	38634058	-0.7829	-0.6154	-0.2727	1.251	-1.095	9.65e-05	0.02267	0.7157	0.004992	0.03996	T	TC	intergenic	AMPH;FAM183BP	dist=2491;dist=51288	rs11379143	7	38634058	9.65e-05	0.02267	0.7157	0.004992	0.03996	T	TC	0.2941	942	0.1976	334	0.347	608	0.168	500	0.1262	206	0.1973	294	0.3514	222	0.4815	54	0.3095	168	0.1842	76	0.15	20
rs76541467	7	45826734	0.9843	1.195	0.8154	0.914	0.6124	1.42e-05	0.0001186	0.489	0.06465	0.3187	C	G	intergenic	LOC730234;IGFBP1	dist=18824;dist=61754	.	7	45826734	1.42e-05	0.0001186	0.489	0.06465	0.3187	C	G	0.1306	942	0.1856	334	0.1003	608	0.126	500	0.1845	206	0.08503	294	0.1577	222	0.2222	54	0.1369	168	0.09211	76	0.15	20
rs4917026	7	48833577	0.554	0.9092	0.02486	0.3392	0.1311	0.0006632	4.52e-05	0.9728	0.3375	0.7993	T	C	intergenic	ABCA13;CDC14C	dist=186080;dist=90970	.	7	48833577	0.0006632	4.52e-05	0.9728	0.3375	0.7993	T	C	0.2786	944	0.3383	334	0.2459	610	0.2669	502	0.3641	206	0.1993	296	0.3288	222	0.3519	54	0.3214	168	0.2632	76	0.25	20
rs10276319	7	48834156	0.5479	0.8904	0.02486	0.3392	0.1311	0.0007019	5.37e-05	0.9728	0.3375	0.7993	T	G	intergenic	ABCA13;CDC14C	dist=186659;dist=90391	.	7	48834156	0.0007019	5.37e-05	0.9728	0.3375	0.7993	T	G	0.2824	942	0.3443	334	0.2484	608	0.272	500	0.3689	206	0.2041	294	0.3288	222	0.3519	54	0.3214	168	0.2763	76	0.3	20
rs10235432	7	48834668	0.5479	0.8904	0.02486	0.3392	0.1311	0.0007019	5.37e-05	0.9728	0.3375	0.7993	T	A	intergenic	ABCA13;CDC14C	dist=187171;dist=89879	.	7	48834668	0.0007019	5.37e-05	0.9728	0.3375	0.7993	T	A	0.2824	942	0.3443	334	0.2484	608	0.272	500	0.3689	206	0.2041	294	0.3288	222	0.3519	54	0.3214	168	0.2763	76	0.3	20
rs12718307	7	48834964	0.5479	0.8904	0.02486	0.3392	0.1311	0.0007019	5.37e-05	0.9728	0.3375	0.7993	T	C	intergenic	ABCA13;CDC14C	dist=187467;dist=89583	.	7	48834964	0.0007019	5.37e-05	0.9728	0.3375	0.7993	T	C	0.2824	942	0.3443	334	0.2484	608	0.272	500	0.3689	206	0.2041	294	0.3288	222	0.3519	54	0.3214	168	0.2763	76	0.3	20
rs4917027	7	48835303	0.5197	0.8503	0.2072	0.2586	0.1311	0.001118	8.99e-05	0.7497	0.4639	0.7993	G	A	intergenic	ABCA13;CDC14C	dist=187806;dist=89244	.	7	48835303	0.001118	8.99e-05	0.7497	0.4639	0.7993	G	A	0.2834	942	0.3413	334	0.2516	608	0.274	500	0.3689	206	0.2075	294	0.3243	222	0.3333	54	0.3214	168	0.3026	76	0.35	20
rs4917176	7	48835349	0.5479	0.8904	0.02486	0.3392	0.1311	0.0007019	5.37e-05	0.9728	0.3375	0.7993	T	A	intergenic	ABCA13;CDC14C	dist=187852;dist=89198	.	7	48835349	0.0007019	5.37e-05	0.9728	0.3375	0.7993	T	A	0.2824	942	0.3443	334	0.2484	608	0.272	500	0.3689	206	0.2041	294	0.3288	222	0.3519	54	0.3214	168	0.2763	76	0.3	20
rs4917177	7	48835351	0.5394	0.8503	0.2072	0.3392	0.1311	0.0007376	8.99e-05	0.7497	0.3375	0.7993	T	A	intergenic	ABCA13;CDC14C	dist=187854;dist=89196	.	7	48835351	0.0007376	8.99e-05	0.7497	0.3375	0.7993	T	A	0.2856	942	0.3473	334	0.2516	608	0.274	500	0.3689	206	0.2075	294	0.3288	222	0.3519	54	0.3214	168	0.3026	76	0.35	20
rs10247215	7	48836476	0.5394	0.8503	0.2072	0.3392	0.1311	0.0007376	8.99e-05	0.7497	0.3375	0.7993	G	T	intergenic	ABCA13;CDC14C	dist=188979;dist=88071	.	7	48836476	0.0007376	8.99e-05	0.7497	0.3375	0.7993	G	T	0.2856	942	0.3473	334	0.2516	608	0.274	500	0.3689	206	0.2075	294	0.3288	222	0.3519	54	0.3214	168	0.3026	76	0.35	20
rs4917178	7	48837270	0.5519	0.8904	0.07351	0.3392	0.1311	0.0006469	5.37e-05	0.9194	0.3375	0.7993	T	A	intergenic	ABCA13;CDC14C	dist=189773;dist=87277	.	7	48837270	0.0006469	5.37e-05	0.9194	0.3375	0.7993	T	A	0.2819	940	0.3443	334	0.2475	606	0.272	500	0.3689	206	0.2041	294	0.3288	222	0.3519	54	0.3214	168	0.2703	74	0.3	20
rs4917028	7	48838524	0.5277	0.8904	0.02486	0.2586	0.1311	0.00107	5.37e-05	0.9728	0.4639	0.7993	T	C	intergenic	ABCA13;CDC14C	dist=191027;dist=86023	.	7	48838524	0.00107	5.37e-05	0.9728	0.4639	0.7993	T	C	0.2813	942	0.3413	334	0.2484	608	0.272	500	0.3689	206	0.2041	294	0.3243	222	0.3333	54	0.3214	168	0.2763	76	0.3	20
rs10239788	7	57343720	-0.7313	-0.7112	-0.9956	-1.207	-0.4402	8.66e-05	0.002488	0.267	0.01752	0.3646	G	A	intergenic	LOC105375297;LOC100653233	dist=121546;dist=61047	.	7	57343720	8.66e-05	0.002488	0.267	0.01752	0.3646	A	G	0.259	942	0.1946	334	0.2944	608	0.294	500	0.2282	206	0.3401	294	0.2252	222	0.1111	54	0.2619	168	0.2105	76	0.1	20
rs4870646	7	57344712	-0.7313	-0.7112	-0.9956	-1.207	-0.4402	8.66e-05	0.002488	0.267	0.01752	0.3646	C	T	intergenic	LOC105375297;LOC100653233	dist=122538;dist=60055	.	7	57344712	8.66e-05	0.002488	0.267	0.01752	0.3646	T	C	0.2601	942	0.1976	334	0.2944	608	0.296	500	0.233	206	0.3401	294	0.2252	222	0.1111	54	0.2619	168	0.2105	76	0.1	20
rs78970401	7	57645272	0.7759	1.133	-0.5635	0.4633	0.8222	0.0001683	4.17e-05	0.5254	0.3439	0.1553	A	G	intergenic	ZNF716;NONE	dist=171713;dist=NONE	.	7	57645272	0.0001683	4.17e-05	0.5254	0.3439	0.1553	A	G	0.2278	944	0.2814	334	0.1984	610	0.239	502	0.3155	206	0.1858	296	0.2387	222	0.2593	54	0.2321	168	0.2237	76	0.2	20
rs75878035	7	57701223	0.799	1.109	2.21	-0.2477	1.121	0.0001228	7.8e-05	0.03693	0.6169	0.06987	G	A	intergenic	ZNF716;NONE	dist=227664;dist=NONE	.	7	57701223	0.0001228	7.8e-05	0.03693	0.6169	0.06987	G	A	0.2026	928	0.2638	326	0.1694	602	0.2186	494	0.2921	202	0.1678	292	0.1909	220	0.1667	54	0.1988	166	0.1711	76	0.3	20
C7_57937184	7	57937184	-0.8248	-1.083	-0.3793	-0.5741	-0.505	8.05e-05	0.0001102	0.6562	0.2309	0.362	C	T	intergenic	ZNF716;NONE	dist=463625;dist=NONE	.	7	57937184	8.05e-05	0.0001102	0.6562	0.2309	0.362	C	T	0.2611	942	0.2066	334	0.2911	608	0.254	500	0.1893	206	0.2993	294	0.2568	222	0.2222	54	0.2679	168	0.2368	76	0.2	20
C7_60974382	7	60974382	-1.169	-1.317	0.477	-1.906	-0.6799	9.99e-05	0.0009899	0.6739	0.07346	0.3084	A	C	intergenic	NONE;NONE	dist=NONE;dist=NONE	.	7	60974382	9.99e-05	0.0009899	0.6739	0.07346	0.3084	A	C	0.1004	936	0.05389	334	0.1262	602	0.102	500	0.04854	206	0.1395	294	0.09633	218	0.03704	54	0.1159	164	0.06579	76	0.1	20
rs36162631	7	62339007	1.034	1.282	0.7873	0.7144	1.141	3.07e-06	2.22e-05	0.3859	0.1712	0.0577	C	T	intergenic	NONE;ZNF733P	dist=NONE;dist=952285	.	7	62339007	3.07e-06	2.22e-05	0.3859	0.1712	0.0577	C	T	0.1438	932	0.2048	332	0.11	600	0.1492	496	0.2184	206	0.1	290	0.1389	216	0.1731	52	0.128	164	0.1316	76	0.2	20
C7_62339041	7	62339041	0.9075	1.22	0.22	0.3165	1.164	3.61e-05	4.4e-05	0.8064	0.5465	0.05183	A	G	intergenic	NONE;ZNF733P	dist=NONE;dist=952251	.	7	62339041	3.61e-05	4.4e-05	0.8064	0.5465	0.05183	A	G	0.1501	926	0.2061	330	0.1191	596	0.1545	492	0.2233	206	0.1049	286	0.1389	216	0.1538	52	0.1341	164	0.1711	76	0.2	20
rs75905565	7	62347917	0.6916	1.179	0.1712	-0.4872	0.3904	0.001002	3.1e-05	0.8576	0.3535	0.4978	A	C	intergenic	NONE;ZNF733P	dist=NONE;dist=943375	.	7	62347917	0.001002	3.1e-05	0.8576	0.3535	0.4978	A	C	0.1706	944	0.2156	334	0.1459	610	0.1833	502	0.2573	206	0.1318	296	0.1712	222	0.1296	54	0.1845	168	0.1316	76	0.15	20
rs78744182	7	62347918	0.7008	1.141	0.1712	-0.3568	0.3904	0.0008733	5.63e-05	0.8576	0.4936	0.4978	A	C	intergenic	NONE;ZNF733P	dist=NONE;dist=943374	.	7	62347918	0.0008733	5.63e-05	0.8576	0.4936	0.4978	A	C	0.1706	944	0.2156	334	0.1459	610	0.1813	502	0.2524	206	0.1318	296	0.1757	222	0.1481	54	0.1845	168	0.1316	76	0.15	20
C7_M8772	7	71792016	0.7397	0.6348	NA	2.369	-0.07783	0.04897	0.5556	NA	4.88e-05	0.9465	G	GA	intronic	CALN1	.	rs11437642	7	71792016	0.04897	0.5556	NA	4.88e-05	0.9465	GA	G	0.04767	944	0.0509	334	0.0459	610	0.007968	502	0.009709	206	0.006757	296	0.1036	222	0.2407	54	0.05952	168	0.1447	76	0	20
C7_73125292	7	73125292	-1.01	-1.124	-0.494	-0.531	-1.387	6.47e-06	0.0001134	0.5733	0.3396	0.04017	T	C	intronic	SPDYE10P;SPDYE14	.	.	7	73125292	6.47e-06	0.0001134	0.5733	0.3396	0.04017	T	C	0.3635	938	0.2994	334	0.399	604	0.3394	498	0.2718	206	0.387	292	0.4	220	0.3704	54	0.4096	166	0.3289	76	0.25	20
rs6962353	7	88560738	0.4943	0.8852	0.3173	-0.3391	0.2996	0.002527	8.77e-05	0.7409	0.4043	0.4986	G	A	intergenic	STEAP4;ZNF804B	dist=253844;dist=198962	.	7	88560738	0.002527	8.77e-05	0.7409	0.4043	0.4986	G	A	0.2734	940	0.3443	334	0.2343	606	0.302	500	0.4029	206	0.2313	294	0.2342	222	0.2037	54	0.244	168	0.1447	76	0.15	20
rs11978348	7	88562121	0.5136	0.9178	0.3173	-0.3087	0.2996	0.001844	6.13e-05	0.7409	0.4463	0.4986	A	G	intergenic	STEAP4;ZNF804B	dist=255227;dist=197579	.	7	88562121	0.001844	6.13e-05	0.7409	0.4463	0.4986	A	G	0.2718	942	0.3443	334	0.2319	608	0.3008	502	0.4029	206	0.2297	296	0.2297	222	0.2037	54	0.2381	168	0.1447	76	0.15	20
rs12532487	7	88563886	0.5124	0.9239	0.3173	-0.3359	0.2996	0.001882	5.51e-05	0.7409	0.4086	0.4986	G	A	intergenic	STEAP4;ZNF804B	dist=256992;dist=195814	.	7	88563886	0.001882	5.51e-05	0.7409	0.4086	0.4986	G	A	0.2719	938	0.3443	334	0.2318	604	0.3	500	0.4029	206	0.2279	294	0.2318	220	0.2037	54	0.241	166	0.1447	76	0.15	20
rs17357419	7	88564210	0.5145	0.9292	0.3173	-0.3359	0.2996	0.001815	5.19e-05	0.7409	0.4086	0.4986	G	A	intergenic	STEAP4;ZNF804B	dist=257316;dist=195490	.	7	88564210	0.001815	5.19e-05	0.7409	0.4086	0.4986	G	A	0.2719	938	0.3443	334	0.2318	604	0.3	500	0.4029	206	0.2279	294	0.2318	220	0.2037	54	0.241	166	0.1447	76	0.15	20
rs6952109	7	88566015	0.5593	1.096	NA	-0.4135	0.537	0.0007543	1.01e-05	NA	0.3169	0.2136	A	G	intergenic	STEAP4;ZNF804B	dist=259121;dist=193685	.	7	88566015	0.0007543	1.01e-05	NA	0.3169	0.2136	A	G	0.2877	876	0.3648	318	0.2437	558	0.3114	456	0.4271	192	0.2273	264	0.2356	208	0.1923	52	0.25	156	0.25	72	0.2	20
C7_M10681	7	88570435	0.5342	1.011	0.1561	-0.3132	0.2476	0.001096	1.58e-05	0.8717	0.4304	0.5452	C	CA	intergenic	STEAP4;ZNF804B	dist=263541;dist=189265	rs368796730	7	88570435	0.001096	1.58e-05	0.8717	0.4304	0.5452	CA	C	0.2877	942	0.3623	334	0.2467	608	0.308	500	0.4175	206	0.2313	294	0.2342	222	0.2037	54	0.244	168	0.1579	76	0.15	20
rs28691655	7	88573784	0.5413	1.008	0.6928	-0.3104	0.2801	0.0006407	1.45e-05	0.3007	0.4228	0.4853	A	G	intergenic	STEAP4;ZNF804B	dist=266890;dist=185916	.	7	88573784	0.0006407	1.45e-05	0.3007	0.4228	0.4853	A	G	0.3015	932	0.3795	332	0.2583	600	0.3112	498	0.4216	204	0.2347	294	0.2318	220	0.2037	54	0.241	166	0.2763	76	0.3	20
rs2188253	7	88574551	0.5418	1.033	0.09607	-0.3287	0.1871	0.0009012	9.81e-06	0.9215	0.3927	0.6485	A	G	intergenic	STEAP4;ZNF804B	dist=267657;dist=185149	.	7	88574551	0.0009012	9.81e-06	0.9215	0.3927	0.6485	A	G	0.2819	940	0.3563	334	0.2409	606	0.3	500	0.4126	206	0.2211	294	0.2342	222	0.2037	54	0.244	168	0.1711	76	0.15	20
rs3779460	7	111337080	0.9338	0.4014	NA	2.2	-0.6104	0.00133	0.4728	NA	4.29e-05	0.5223	T	C	intronic	IMMP2L	.	.	7	111337080	0.00133	0.4728	NA	4.29e-05	0.5223	T	C	0.06489	940	0.08683	334	0.05281	606	0.028	500	0.03398	206	0.02381	294	0.1757	222	0.3704	54	0.1131	168	0.01316	76	0	20
rs6970530	7	137281584	1.459	1.599	0.672	1.014	NA	8.25e-05	0.001379	0.4736	0.347	NA	A	G	intronic	PTN	.	.	7	137281584	8.25e-05	0.001379	0.4736	0.347	NA	A	G	0.04352	942	0.08084	334	0.02303	608	0.05	500	0.09223	206	0.02041	294	0.02252	222	0.03704	54	0.01786	168	0.1053	76	0.15	20
rs12113527	7	137284362	1.54	1.609	1.362	1.014	NA	3.69e-05	0.001305	0.1508	0.347	NA	G	A	intronic	PTN	.	.	7	137284362	3.69e-05	0.001305	0.1508	0.347	NA	G	A	0.04459	942	0.08383	334	0.02303	608	0.05	500	0.09223	206	0.02041	294	0.02252	222	0.03704	54	0.01786	168	0.1184	76	0.2	20
rs7792298	7	137286668	1.447	1.604	0.6709	1.014	NA	8.99e-05	0.001344	0.4884	0.347	NA	G	A	intronic	PTN	.	.	7	137286668	8.99e-05	0.001344	0.4884	0.347	NA	G	A	0.04352	942	0.08084	334	0.02303	608	0.0498	502	0.09223	206	0.02027	296	0.02252	222	0.03704	54	0.01786	168	0.1053	76	0.15	20
rs12536916	7	137287256	1.446	1.599	0.6709	1.014	NA	9.17e-05	0.001379	0.4884	0.347	NA	C	A	intronic	PTN	.	.	7	137287256	9.17e-05	0.001379	0.4884	0.347	NA	C	A	0.04352	942	0.08084	334	0.02303	608	0.05	500	0.09223	206	0.02041	294	0.02252	222	0.03704	54	0.01786	168	0.1053	76	0.15	20
rs191397117	7	142309706	0.6652	1.092	-0.6456	0.09926	0.6306	0.001351	9.19e-05	0.4979	0.8405	0.2877	T	C	intergenic	TRY2P;TCAF2	dist=37457;dist=101518	.	7	142309706	0.001351	9.19e-05	0.4979	0.8405	0.2877	T	C	0.1854	944	0.2335	334	0.159	610	0.2072	502	0.2767	206	0.1588	296	0.1622	222	0.1667	54	0.1607	168	0.1842	76	0.1	20
rs183613080	7	142309709	0.7424	1.126	-0.3219	0.08369	0.9185	0.0003868	5.37e-05	0.742	0.8651	0.1354	C	T	intergenic	TRY2P;TCAF2	dist=37460;dist=101515	.	7	142309709	0.0003868	5.37e-05	0.742	0.8651	0.1354	C	T	0.179	944	0.2335	334	0.1492	610	0.1992	502	0.2718	206	0.1486	296	0.1667	222	0.1852	54	0.1607	168	0.1579	76	0.1	20
C7_142455497	7	142455497	0.838	1.022	2.044	0.06061	0.7854	8.8e-05	0.0002865	0.05247	0.9046	0.2034	A	G	intronic	TCAF2	.	.	7	142455497	8.8e-05	0.0002865	0.05247	0.9046	0.2034	A	G	0.172	942	0.2305	334	0.1398	608	0.194	500	0.2621	206	0.1463	294	0.1667	222	0.1667	54	0.1667	168	0.1184	76	0.25	20
C7_142469910	7	142469910	-0.3972	-1.138	0.7751	0.4973	0.8903	0.05676	6.44e-05	0.4148	0.2971	0.1495	G	A	intronic	TCAF2	.	.	7	142469910	0.05676	6.44e-05	0.4148	0.2971	0.1495	G	A	0.258	942	0.2365	334	0.2697	608	0.278	500	0.2136	206	0.3231	294	0.2613	222	0.2963	54	0.25	168	0.2763	76	0.35	20
C7_142487583	7	142487583	-0.8635	-1.55	-0.172	-0.4047	-0.4591	0.0005617	4.63e-05	0.9003	0.4811	0.4511	A	T	intronic	TCAF2	.	.	7	142487583	0.0005617	4.63e-05	0.9003	0.4811	0.4511	A	T	0.4004	944	0.3623	334	0.4213	610	0.4104	502	0.3544	206	0.4493	296	0.4009	222	0.3889	54	0.4048	168	0.4474	76	0.45	20
rs112786145	7	144024138	0.6313	0.2707	NA	2.204	0.368	0.006896	0.364	NA	5.82e-05	0.6112	T	C	intergenic	OR6B1;OR2A5	dist=19163;dist=24810	.	7	144024138	0.006896	0.364	NA	5.82e-05	0.6112	T	C	0.1221	934	0.1555	328	0.104	606	0.1377	494	0.145	200	0.1327	294	0.1364	220	0.2963	54	0.08434	166	0.02632	76	0	20
rs4840475	8	10295089	0.1814	-0.1071	-0.8013	2.155	0.2874	0.2646	0.5931	0.4641	4.42e-05	0.5162	C	T	intronic	MSRA	.	.	8	10295089	0.2646	0.5931	0.4641	4.42e-05	0.5162	T	C	0.2558	942	0.2904	334	0.2368	608	0.31	500	0.2961	206	0.3197	294	0.1757	222	0.3704	54	0.1131	168	0.1842	76	0.15	20
C8_12016184	8	12016184	0.9515	0.8993	0.5074	0.8314	1.263	1.19e-05	0.001318	0.5674	0.1237	0.04101	A	G	intergenic	DEFB134;DEFB130A	dist=15432;dist=48205	.	8	12016184	1.19e-05	0.001318	0.5674	0.1237	0.04101	A	G	0.2702	940	0.3323	334	0.236	606	0.272	500	0.335	206	0.2279	294	0.3136	220	0.3704	54	0.2952	166	0.2368	76	0.3	20
rs9314309	8	25785663	-0.662	-0.9153	-1.795	-0.2127	0.1691	0.0001716	8.65e-05	0.07646	0.605	0.7186	C	T	intergenic	CDCA2;EBF2	dist=277746;dist=56063	.	8	25785663	0.0001716	8.65e-05	0.07646	0.605	0.7186	C	T	0.2877	942	0.2275	334	0.3207	608	0.326	500	0.233	206	0.3912	294	0.2072	222	0.1852	54	0.2143	168	0.2763	76	0.15	20
rs55668851	8	41121181	-0.8366	-0.9119	-1.21	-0.9932	0.4357	8.8e-05	0.000288	0.1596	0.2254	0.5558	T	C	intergenic	ZMAT4;SFRP1	dist=223355;dist=140781	.	8	41121181	8.8e-05	0.000288	0.1596	0.2254	0.5558	T	C	0.1798	940	0.1317	334	0.2063	606	0.2349	498	0.1602	206	0.2877	292	0.08108	222	0.03704	54	0.09524	168	0.2895	76	0.15	20
rs72655626	8	54374839	1.014	0.8671	1.916	1.483	0.3894	9.52e-05	0.01448	0.1711	0.006645	0.5873	C	T	intergenic	RNU105C;SOX17	dist=43944;dist=83096	.	8	54374839	9.52e-05	0.01448	0.1711	0.006645	0.5873	C	T	0.08476	932	0.1333	330	0.05814	602	0.078	500	0.1165	206	0.05102	294	0.09174	218	0.1852	54	0.06098	164	0.03947	76	0.1	20
rs76303410	8	76104861	1.275	0.9951	1.301	NA	2.6	9.28e-05	0.01316	0.1885	NA	0.002839	A	G	intergenic	HNF4G;LINC01111	dist=538035;dist=301793	.	8	76104861	9.28e-05	0.01316	0.1885	NA	0.002839	A	G	0.0552	942	0.09639	332	0.03279	610	0.066	500	0.09804	204	0.04392	296	0.004505	222	0	54	0.005952	168	0.09211	76	0.15	20
rs79569789	8	76114674	1.198	0.8929	1.713	NA	2.175	0.000112	0.02236	0.04903	NA	0.004647	G	A	intergenic	HNF4G;LINC01111	dist=547848;dist=291980	.	8	76114674	0.000112	0.02236	0.04903	NA	0.004647	G	A	0.06051	942	0.1018	334	0.03783	608	0.068	500	0.09709	206	0.04762	294	0.004505	222	0	54	0.005952	168	0.1316	76	0.25	20
rs10955882	8	89036293	-0.617	-0.8858	0.5829	-0.5522	0.1647	0.0005875	9.19e-05	0.5233	0.2188	0.8002	G	T	intergenic	MMP16;LOC101929709	dist=708810;dist=681106	.	8	89036293	0.0005875	9.19e-05	0.5233	0.2188	0.8002	G	T	0.2755	940	0.2275	334	0.302	606	0.346	500	0.2524	206	0.4116	294	0.2387	222	0.2037	54	0.25	168	0.1842	76	0.25	20
rs4960963	8	89149163	0.2642	-0.8433	-2.486	-0.3679	-0.3461	0.0741	7.77e-05	0.04778	0.26	0.4263	T	C	intergenic	MMP16;LOC101929709	dist=821680;dist=568236	.	8	89149163	0.0741	7.77e-05	0.04778	0.26	0.4263	T	C	0.4703	942	0.482	334	0.4441	608	0.4781	502	0.3689	206	0.4459	296	0.4727	220	0.4074	54	0.494	166	0.2895	76	0.15	20
C8_M10499	8	89266865	-0.4023	-0.8776	1.492	0.2684	-0.5009	0.009261	9.37e-05	0.06192	0.4198	0.2308	C	CCAGT	intergenic	MMP16;LOC101929709	dist=939382;dist=450534	rs745340449	8	89266865	0.009261	9.37e-05	0.06192	0.4198	0.2308	C	CCAGT	0.3471	942	0.2904	334	0.3783	608	0.3625	502	0.2524	206	0.4392	296	0.3739	222	0.4074	54	0.3631	168	0.1842	76	0.35	20
rs149243681	9	11754	-0.6943	-1.213	0.2839	0.1897	-0.3895	0.0007494	1.85e-05	0.7454	0.6928	0.4736	C	G	upstream	DDX11L5	dist=233	.	9	11754	0.0007494	1.85e-05	0.7454	0.6928	0.4736	C	G	0.2686	942	0.2126	334	0.2993	608	0.257	502	0.1748	206	0.3142	296	0.2838	222	0.2963	54	0.2798	168	0.3243	74	0.3	20
rs12378393	9	7594660	0.7586	0.7451	1.702	0.6712	0.8864	7.23e-06	0.001052	0.0559	0.07358	0.06488	A	T	intergenic	KDM4C;DMAC1	dist=419012;dist=201840	.	9	7594660	7.23e-06	0.001052	0.0559	0.07358	0.06488	A	T	0.2885	936	0.3788	330	0.2393	606	0.2992	498	0.3738	206	0.2466	292	0.25	220	0.3269	52	0.2262	168	0.3289	76	0.45	20
rs2171008	9	7595510	0.7226	0.7891	0.7095	0.5979	0.7908	1.67e-05	0.0005632	0.3653	0.09252	0.09739	G	C	intergenic	KDM4C;DMAC1	dist=419862;dist=200990	.	9	7595510	1.67e-05	0.0005632	0.3653	0.09252	0.09739	G	C	0.2936	940	0.3772	334	0.2475	606	0.3	500	0.3786	206	0.2449	294	0.2773	220	0.3519	54	0.253	166	0.3026	76	0.45	20
rs28575948	9	7597683	-0.6442	-0.6633	-0.9387	-0.5951	-0.6213	7.32e-05	0.003058	0.1604	0.1065	0.1249	G	A	intergenic	KDM4C;DMAC1	dist=422035;dist=198817	.	9	7597683	7.32e-05	0.003058	0.1604	0.1065	0.1249	A	G	0.327	942	0.2425	334	0.3734	608	0.29	500	0.2233	206	0.3367	294	0.3694	222	0.2963	54	0.3929	168	0.3684	76	0.2	20
rs10120071	9	7598529	0.7409	0.7803	1.504	0.5556	0.7131	9.43e-06	0.0007051	0.06599	0.1112	0.1263	G	C	intergenic	KDM4C;DMAC1	dist=422881;dist=197971	.	9	7598529	9.43e-06	0.0007051	0.06599	0.1112	0.1263	G	C	0.2892	944	0.3743	334	0.2426	610	0.2968	502	0.3738	206	0.2432	296	0.2613	222	0.3333	54	0.2381	168	0.3289	76	0.45	20
rs7870185	9	13597233	0.7548	0.8232	1.453	0.5748	0.7571	6.72e-05	0.0009107	0.1165	0.1916	0.1995	T	A	intergenic	LINC01235;LINC00583	dist=165904;dist=330738	.	9	13597233	6.72e-05	0.0009107	0.1165	0.1916	0.1995	A	T	0.1815	942	0.2515	334	0.1431	608	0.204	500	0.267	206	0.1599	294	0.1441	222	0.2037	54	0.125	168	0.1579	76	0.25	20
rs1105191	9	15370577	0.6217	0.6442	-0.6323	0.9442	0.2868	7.91e-05	0.002632	0.2992	0.008049	0.5088	A	G	intergenic	TTC39B;SNAPC3	dist=63217;dist=52207	.	9	15370577	7.91e-05	0.002632	0.2992	0.008049	0.5088	G	A	0.3885	942	0.4611	334	0.3487	608	0.39	500	0.4612	206	0.3401	294	0.3874	222	0.463	54	0.3393	168	0.4474	76	0.35	20
rs2996232	9	15379146	1.11	-0.1839	1.455	2.269	0.5474	0.001065	0.78	0.08397	5.99e-05	0.717	C	T	intergenic	TTC39B;SNAPC3	dist=71786;dist=43638	.	9	15379146	0.001065	0.78	0.08397	5.99e-05	0.717	T	C	0.06397	938	0.08133	332	0.05446	606	0.0261	498	0.02451	204	0.02721	294	0.09545	220	0.2407	54	0.04819	166	0.3158	76	0.4	20
rs112250914	9	15379220	0.9825	0.1872	-0.5666	2.333	0.5474	0.006639	0.7872	0.5478	7.61e-05	0.717	T	C	intergenic	TTC39B;SNAPC3	dist=71860;dist=43564	.	9	15379220	0.006639	0.7872	0.5478	7.61e-05	0.717	T	C	0.04797	938	0.06287	334	0.03974	604	0.02016	496	0.02427	206	0.01724	290	0.08559	222	0.2222	54	0.04167	168	0.1842	76	0.15	20
rs2997863	9	15379285	0.9727	-0.2611	0.9868	2.333	0.5474	0.00436	0.6904	0.2101	7.61e-05	0.717	T	C	intergenic	TTC39B;SNAPC3	dist=71925;dist=43499	.	9	15379285	0.00436	0.6904	0.2101	7.61e-05	0.717	C	T	0.06038	944	0.07485	334	0.05246	610	0.0259	502	0.02427	206	0.02703	296	0.08559	222	0.2222	54	0.04167	168	0.3026	76	0.35	20
rs2997864	9	15379400	1.169	-0.3201	2.801	2.333	0.5474	0.0009577	0.6272	0.01812	7.61e-05	0.717	G	A	intergenic	TTC39B;SNAPC3	dist=72040;dist=43384	.	9	15379400	0.0009577	0.6272	0.01812	7.61e-05	0.717	A	G	0.05532	940	0.07485	334	0.04455	606	0.0261	498	0.02427	206	0.0274	292	0.08559	222	0.2222	54	0.04167	168	0.2368	76	0.35	20
C9_41250005	9	41250005	-0.9289	-1.187	-1.043	-0.334	-0.6485	2.62e-05	4.12e-05	0.3202	0.4964	0.3559	C	A	intergenic	MIR4477A;LOC107984035	dist=16170;dist=108857	.	9	41250005	2.62e-05	4.12e-05	0.3202	0.4964	0.3559	C	A	0.3485	944	0.2874	334	0.382	610	0.3367	502	0.2573	206	0.3919	296	0.3198	222	0.2963	54	0.3274	168	0.3684	76	0.3	20
C9_41250014	9	41250014	-0.8567	-0.9436	-1.012	-0.5761	-0.677	6.06e-05	0.0007177	0.2694	0.2269	0.3031	A	C	intergenic	MIR4477A;LOC107984035	dist=16179;dist=108848	.	9	41250014	6.06e-05	0.0007177	0.2694	0.2269	0.3031	A	C	0.322	944	0.2635	334	0.3541	610	0.3147	502	0.2476	206	0.3615	296	0.2838	222	0.2407	54	0.2976	168	0.3158	76	0.2	20
C9_41299606	9	41299606	-0.8459	-1.152	-2.363	-0.02075	-0.9215	0.0001147	7.28e-05	0.1084	0.9675	0.1471	T	C	intergenic	MIR4477A;LOC107984035	dist=65771;dist=59256	.	9	41299606	0.0001147	7.28e-05	0.1084	0.9675	0.1471	T	C	0.3506	924	0.2939	330	0.3822	594	0.3347	496	0.267	206	0.3828	290	0.3458	214	0.3462	52	0.3457	162	0.4459	74	0.3889	18
C9_41299614	9	41299614	-0.8494	-1.152	-2.363	-0.02804	-0.9215	0.0001075	7.28e-05	0.1084	0.9561	0.1471	G	T	intergenic	MIR4477A;LOC107984035	dist=65779;dist=59248	.	9	41299614	0.0001075	7.28e-05	0.1084	0.9561	0.1471	G	T	0.351	926	0.2939	330	0.3826	596	0.3347	496	0.267	206	0.3828	290	0.3472	216	0.3462	52	0.3476	164	0.4459	74	0.3889	18
C9_63761501	9	63761501	0.7497	1.104	-0.9992	0.6848	0.5303	0.0002958	6.82e-05	0.3005	0.1718	0.3569	A	G	intergenic	LOC100996643;LINC00537	dist=382654;dist=51440	.	9	63761501	0.0002958	6.82e-05	0.3005	0.1718	0.3569	A	G	0.2049	942	0.2575	334	0.176	608	0.232	500	0.301	206	0.1837	294	0.1802	222	0.2037	54	0.1726	168	0.2105	76	0.2	20
rs111861593	9	63811371	-0.9737	-0.9003	-2.891	-0.6331	-1.155	9.93e-06	0.001825	0.007441	0.1987	0.06706	C	T	intergenic	LOC100996643;LINC00537	dist=432524;dist=1570	.	9	63811371	9.93e-06	0.001825	0.007441	0.1987	0.06706	C	T	0.3535	942	0.2904	334	0.3882	608	0.342	500	0.2864	206	0.381	294	0.3514	222	0.2963	54	0.369	168	0.3816	76	0.25	20
C9_63811924	9	63811924	0.8174	1.096	1.258	-0.0117	0.8905	7.61e-05	7.85e-05	0.1616	0.9803	0.1062	C	T	intergenic	LOC100996643;LINC00537	dist=433077;dist=1017	.	9	63811924	7.61e-05	7.85e-05	0.1616	0.9803	0.1062	C	T	0.2172	944	0.2695	334	0.1885	610	0.2032	502	0.2816	206	0.1486	296	0.2387	222	0.2222	54	0.244	168	0.2368	76	0.3	20
rs62545564	9	63893835	0.834	1.103	2.467	-0.3494	1.197	7.06e-05	8.19e-05	0.05742	0.4606	0.04426	G	A	intergenic	FRG1JP;FLJ43315	dist=34201;dist=123115	.	9	63893835	7.06e-05	8.19e-05	0.05742	0.4606	0.04426	G	A	0.2654	942	0.3204	334	0.2352	608	0.262	500	0.335	206	0.2109	294	0.2658	222	0.2222	54	0.2798	168	0.3026	76	0.45	20
rs62546900	9	63906571	-0.8544	-1.1	-0.2781	-0.2812	-0.9917	7.29e-05	0.0001143	0.7911	0.594	0.09193	T	G	intergenic	FRG1JP;FLJ43315	dist=46937;dist=110379	.	9	63906571	7.29e-05	0.0001143	0.7911	0.594	0.09193	T	G	0.3418	942	0.2844	334	0.3734	608	0.328	500	0.2573	206	0.3776	294	0.3604	222	0.3519	54	0.3631	168	0.3553	76	0.35	20
C9_63906587	9	63906587	-1.006	-1.048	-1.348	-0.7537	-1.201	1.75e-06	0.0001532	0.1794	0.1223	0.04213	C	T	intergenic	FRG1JP;FLJ43315	dist=46953;dist=110363	.	9	63906587	1.75e-06	0.0001532	0.1794	0.1223	0.04213	C	T	0.2951	942	0.2246	334	0.3339	608	0.276	500	0.2087	206	0.3231	294	0.3153	222	0.2593	54	0.3333	168	0.2895	76	0.2	20
C9_67773539	9	67773539	-0.8963	-0.7052	-1.941	-1.108	-1.268	3.35e-05	0.01014	0.1277	0.04733	0.0332	C	T	intergenic	FAM27B;ANKRD20A1	dist=46796;dist=85392	.	9	67773539	3.35e-05	0.01014	0.1277	0.04733	0.0332	C	T	0.2172	944	0.1617	334	0.2475	610	0.245	502	0.199	206	0.277	296	0.1847	222	0.09259	54	0.2143	168	0.1579	76	0.05	20
rs4878120	9	87767909	-0.6535	-0.951	-0.679	0.06167	0.2547	0.0004665	4.69e-05	0.4562	0.9225	0.6045	T	C	intergenic	CTSL;CTSL3P	dist=36440;dist=5006	.	9	87767909	0.0004665	4.69e-05	0.4562	0.9225	0.6045	C	T	0.242	942	0.2006	334	0.2648	608	0.3187	502	0.2184	206	0.3885	296	0.09459	222	0.09259	54	0.09524	168	0.1974	76	0.15	20
rs4878123	9	87768884	-0.6978	-1.021	0.06587	0.1482	0.1152	0.0001946	1.64e-05	0.9395	0.813	0.8166	C	G	intergenic	CTSL;CTSL3P	dist=37415;dist=4031	.	9	87768884	0.0001946	1.64e-05	0.9395	0.813	0.8166	G	C	0.2511	940	0.2036	334	0.2772	606	0.32	500	0.2136	206	0.3946	294	0.09091	220	0.09259	54	0.09036	166	0.2763	76	0.25	20
rs4878124	9	87768892	-0.7036	-1.015	-0.679	0.1482	0.1982	0.0002006	2.06e-05	0.4562	0.813	0.6901	G	A	intergenic	CTSL;CTSL3P	dist=37423;dist=4023	.	9	87768892	0.0002006	2.06e-05	0.4562	0.813	0.6901	A	G	0.2426	940	0.1976	334	0.2673	606	0.318	500	0.2136	206	0.3912	294	0.09091	220	0.09259	54	0.09036	166	0.1974	76	0.15	20
rs9410958	9	87774647	-0.4507	-0.8883	NA	0.3504	0.4075	0.006461	8.55e-05	NA	0.3355	0.3626	C	T	ncRNA_intronic	CTSL3P	.	.	9	87774647	0.006461	8.55e-05	NA	0.3355	0.3626	T	C	0.2891	920	0.2455	330	0.3136	590	0.3469	490	0.2426	202	0.4201	288	0.1927	218	0.2407	54	0.1768	164	0.2361	72	0.15	20
rs10121924	9	87782267	-0.5987	-0.9137	-0.6594	0.2592	0.08836	0.001044	8.17e-05	0.4667	0.6411	0.8483	C	T	ncRNA_intronic	CTSL3P	.	.	9	87782267	0.001044	8.17e-05	0.4667	0.6411	0.8483	T	C	0.2527	942	0.2126	334	0.2747	608	0.3247	502	0.2282	206	0.3919	296	0.1036	222	0.1111	54	0.1012	168	0.2368	76	0.2	20
rs7039140	9	87790592	-0.5819	-0.9335	-0.6594	0.4513	0.547	0.001748	6.38e-05	0.4667	0.5066	0.29	C	T	intergenic	CTSL3P;CTSLP8	dist=3708;dist=54153	.	9	87790592	0.001748	6.38e-05	0.4667	0.5066	0.29	T	C	0.2431	942	0.2096	334	0.2615	608	0.326	500	0.2282	206	0.3946	294	0.07658	222	0.09259	54	0.07143	168	0.2368	76	0.2	20
rs1927966	9	87792526	-0.6463	-1.026	-0.9191	0.4513	0.547	0.0005997	1.93e-05	0.2934	0.5066	0.29	C	T	intergenic	CTSL3P;CTSLP8	dist=5642;dist=52219	.	9	87792526	0.0005997	1.93e-05	0.2934	0.5066	0.29	T	C	0.2457	940	0.2048	332	0.2681	608	0.3253	498	0.2206	204	0.398	294	0.07658	222	0.09259	54	0.07143	168	0.2763	76	0.2	20
rs73493277	9	87915431	0.4546	0.7369	NA	0.1939	0.1086	0.001551	7.54e-05	NA	0.6131	0.8259	C	T	ncRNA_intronic	LOC497256	.	.	9	87915431	0.001551	7.54e-05	NA	0.6131	0.8259	C	T	0.3736	886	0.4715	316	0.3193	570	0.4706	476	0.399	198	0.3777	278	0.2059	204	0.25	48	0.1923	156	0.4444	72	0.25	20
rs2985029	9	98148134	-0.4078	-0.8748	0.4138	-0.4109	-0.006833	0.007478	4.07e-05	0.534	0.2455	0.9891	C	T	intronic	CORO2A	.	.	9	98148134	0.007478	4.07e-05	0.534	0.2455	0.9891	T	C	0.3883	922	0.3261	322	0.4217	600	0.3832	488	0.2778	198	0.4552	290	0.4954	216	0.4231	52	0.4817	164	0.2763	76	0.3	20
rs11790033	9	98148469	0.5145	0.8478	0.1759	-0.09734	-0.0929	0.0003785	1.67e-05	0.7554	0.795	0.822	T	C	intronic	CORO2A	.	.	9	98148469	0.0003785	1.67e-05	0.7554	0.795	0.822	T	C	0.4529	934	0.4581	334	0.4033	600	0.4679	498	0.4175	206	0.387	292	0.2936	218	0.2778	54	0.2988	164	0.4865	74	0.45	20
rs9409035	9	102292454	-0.671	-0.7355	0.1114	0.6727	-0.9655	2.92e-05	0.0004128	0.8703	0.13	0.0411	T	G	intergenic	GRIN3A;LINC00587	dist=553807;dist=227183	.	9	102292454	2.92e-05	0.0004128	0.8703	0.13	0.0411	T	G	0.4904	942	0.3713	334	0.4441	608	0.388	500	0.2913	206	0.4558	294	0.2297	222	0.3148	54	0.2024	168	0.4079	76	0.35	20
rs4626667	9	102293536	0.6616	-0.7017	0.1114	0.6037	-1.016	3.47e-05	0.0006063	0.8703	0.1707	0.03422	A	T	intergenic	GRIN3A;LINC00587	dist=554889;dist=226101	.	9	102293536	3.47e-05	0.0006063	0.8703	0.1707	0.03422	T	A	0.4989	938	0.3832	334	0.4338	604	0.4076	498	0.3107	206	0.476	292	0.2342	222	0.3148	54	0.2083	168	0.4079	76	0.35	20
C9_M8807	9	102293902	-0.6486	-0.6807	0.1949	0.6727	-1.016	4.59e-05	0.0007963	0.768	0.13	0.03422	A	AAT	intergenic	GRIN3A;LINC00587	dist=555255;dist=225735	rs3082947	9	102293902	4.59e-05	0.0007963	0.768	0.13	0.03422	AAT	A	0.4989	942	0.3832	334	0.4375	608	0.4044	502	0.3107	206	0.4696	296	0.2297	222	0.3148	54	0.2024	168	0.3947	76	0.35	20
rs4410961	9	102293991	-0.6683	-0.7017	0.1114	0.6727	-1.016	2.97e-05	0.0006063	0.8703	0.13	0.03422	G	C	intergenic	GRIN3A;LINC00587	dist=555344;dist=225646	.	9	102293991	2.97e-05	0.0006063	0.8703	0.13	0.03422	C	G	0.4989	940	0.3832	334	0.434	606	0.406	500	0.3107	206	0.4728	294	0.2297	222	0.3148	54	0.2024	168	0.4079	76	0.35	20
rs2417335	9	102296139	0.6668	-0.6876	-0.134	0.6962	-0.9655	3.22e-05	0.0008106	0.8554	0.1133	0.0411	C	T	intergenic	GRIN3A;LINC00587	dist=557492;dist=223498	.	9	102296139	3.22e-05	0.0008106	0.8554	0.1133	0.0411	T	C	0.4904	942	0.3922	334	0.426	608	0.418	500	0.3252	206	0.483	294	0.2252	222	0.3148	54	0.1964	168	0.4342	76	0.35	20
C9_M8808	9	102297005	0.6632	-0.6661	-0.134	0.6962	-1.038	3.47e-05	0.001066	0.8554	0.1133	0.03175	C	CACA	intergenic	GRIN3A;LINC00587	dist=558358;dist=222632	rs10647931	9	102297005	3.47e-05	0.001066	0.8554	0.1133	0.03175	C	CACA	0.4904	940	0.3922	334	0.4257	606	0.4163	502	0.3252	206	0.4797	296	0.2252	222	0.3148	54	0.1964	168	0.4342	76	0.35	20
rs10760870	9	102298668	-0.7468	-0.8613	-0.5159	0.6054	-0.6394	9.02e-05	0.001083	0.5106	0.195	0.1841	A	G	intergenic	GRIN3A;LINC00587	dist=560021;dist=220969	.	9	102298668	9.02e-05	0.001083	0.5106	0.195	0.1841	A	G	0.3726	934	0.259	332	0.4352	602	0.2238	496	0.1471	204	0.2774	292	0.2636	220	0.3333	54	0.241	166	0.3553	76	0.25	20
rs10739837	9	102298860	-0.7526	-0.8444	-0.5159	0.6883	-0.6394	7.54e-05	0.001154	0.5106	0.1506	0.1841	T	C	intergenic	GRIN3A;LINC00587	dist=560213;dist=220777	.	9	102298860	7.54e-05	0.001154	0.5106	0.1506	0.1841	T	C	0.3721	938	0.2545	330	0.4359	608	0.226	500	0.1471	204	0.2804	296	0.2682	220	0.3462	52	0.244	168	0.3553	76	0.25	20
rs6479098	9	102304895	-0.7216	-0.8675	-0.7002	0.4752	-0.5522	0.0001182	0.0008481	0.383	0.3082	0.2308	G	A	intergenic	GRIN3A;LINC00587	dist=566248;dist=214742	.	9	102304895	0.0001182	0.0008481	0.383	0.3082	0.2308	G	A	0.3747	942	0.2605	334	0.4375	608	0.2251	502	0.1456	206	0.2804	296	0.2613	222	0.3148	54	0.244	168	0.3684	76	0.25	20
rs10733719	9	102316237	-0.7333	-0.8891	-0.8317	0.4752	-0.5243	9.93e-05	0.0006811	0.3139	0.3082	0.2605	G	C	intergenic	GRIN3A;LINC00587	dist=577590;dist=203400	.	9	102316237	9.93e-05	0.0006811	0.3139	0.3082	0.2605	G	C	0.3785	938	0.2635	334	0.4421	604	0.226	500	0.1456	206	0.2823	294	0.2613	222	0.3148	54	0.244	168	0.3816	76	0.25	20
rs1924023	9	102329366	-0.7178	-0.8732	-0.8317	0.4752	-0.4539	0.0001291	0.0007838	0.3139	0.3082	0.3205	A	G	intergenic	GRIN3A;LINC00587	dist=590719;dist=190271	.	9	102329366	0.0001291	0.0007838	0.3139	0.3082	0.3205	A	G	0.3777	940	0.2635	334	0.4406	606	0.226	500	0.1456	206	0.2823	294	0.2613	222	0.3148	54	0.244	168	0.3816	76	0.25	20
rs2417352	9	102330548	-0.707	-0.8891	-0.7002	0.4803	-0.4207	0.0001353	0.0006811	0.383	0.2764	0.3536	A	G	intergenic	GRIN3A;LINC00587	dist=591901;dist=189089	.	9	102330548	0.0001353	0.0006811	0.383	0.2764	0.3536	A	G	0.3737	942	0.2605	334	0.4359	608	0.226	500	0.1456	206	0.2823	294	0.2703	222	0.3333	54	0.25	168	0.3684	76	0.25	20
rs2636859	9	114267142	-0.4496	-0.9338	1.031	0.7869	-0.05776	0.005256	4.26e-05	0.1441	0.02965	0.9035	C	G	intronic	COL27A1	.	.	9	114267142	0.005256	4.26e-05	0.1441	0.02965	0.9035	C	G	0.3747	942	0.3323	334	0.398	608	0.4	500	0.301	206	0.4694	294	0.3243	222	0.463	54	0.2798	168	0.4605	76	0.4	20
C9_M10356	9	114269000	-0.4733	-1.146	0.3973	0.6917	0.2205	0.003375	2.19e-06	0.5296	0.05102	0.6453	A	ATGGTGT	intronic	COL27A1	.	rs112255284	9	114269000	0.003375	2.19e-06	0.5296	0.05102	0.6453	ATGGTGT	A	0.41	944	0.3593	334	0.4377	610	0.4323	502	0.3204	206	0.4899	296	0.3378	222	0.463	54	0.2976	168	0.3026	76	0.4	20
rs2636863	9	114269659	-0.4514	-1.075	0.6808	0.6884	0.2205	0.005251	7.66e-06	0.2791	0.05116	0.6453	G	C	intronic	COL27A1	.	.	9	114269659	0.005251	7.66e-06	0.2791	0.05116	0.6453	G	C	0.4043	930	0.3593	334	0.4295	596	0.4248	492	0.3204	206	0.5	286	0.3364	220	0.463	54	0.2952	166	0.3243	74	0.45	20
rs5003737	9	114269909	-0.4697	-1.152	0.6503	0.6917	0.3344	0.003563	2.02e-06	0.3052	0.05102	0.4841	A	G	intronic	COL27A1	.	.	9	114269909	0.003563	2.02e-06	0.3052	0.05102	0.4841	A	G	0.4096	940	0.3614	332	0.4359	608	0.4317	498	0.3186	204	0.4898	294	0.3378	222	0.463	54	0.2976	168	0.3289	76	0.45	20
rs2636864	9	114270168	-0.4415	-1.136	0.6503	0.7618	0.4479	0.006356	2.89e-06	0.3052	0.03264	0.3531	C	T	intronic	COL27A1	.	.	9	114270168	0.006356	2.89e-06	0.3052	0.03264	0.3531	C	T	0.4045	942	0.3593	334	0.4293	608	0.43	500	0.3204	206	0.4932	294	0.3288	222	0.463	54	0.2857	168	0.3289	76	0.45	20
rs9792407	9	121863267	0.6823	0.6348	0.8727	1.28	0.4724	2.84e-05	0.00185	0.1922	0.007351	0.2703	T	G	intronic	TTLL11	.	.	9	121863267	2.84e-05	0.00185	0.1922	0.007351	0.2703	G	T	0.2972	942	0.3982	334	0.2418	608	0.346	500	0.4223	206	0.2925	294	0.1396	222	0.2778	54	0.09524	168	0.2105	76	0.3	20
rs9792544	9	121863426	0.6526	0.6348	0.6346	1.177	0.4724	6.87e-05	0.00185	0.3917	0.01458	0.2703	G	A	intronic	TTLL11	.	.	9	121863426	6.87e-05	0.00185	0.3917	0.01458	0.2703	A	G	0.2951	942	0.3922	334	0.2418	608	0.346	500	0.4223	206	0.2925	294	0.1351	222	0.2593	54	0.09524	168	0.1974	76	0.25	20
rs7863807	9	121863607	0.6823	0.6348	0.8727	1.28	0.4724	2.84e-05	0.00185	0.1922	0.007351	0.2703	A	G	intronic	TTLL11	.	.	9	121863607	2.84e-05	0.00185	0.1922	0.007351	0.2703	G	A	0.2983	942	0.4012	334	0.2418	608	0.346	500	0.4223	206	0.2925	294	0.1396	222	0.2778	54	0.09524	168	0.2105	76	0.3	20
rs6478538	9	121864733	0.6686	0.6405	0.8727	1.177	0.4724	4.04e-05	0.001676	0.1922	0.01458	0.2703	G	A	intronic	TTLL11	.	.	9	121864733	4.04e-05	0.001676	0.1922	0.01458	0.2703	A	G	0.2966	944	0.3982	334	0.241	610	0.3446	502	0.4223	206	0.2905	296	0.1351	222	0.2593	54	0.09524	168	0.2105	76	0.3	20
rs4240471	9	121865978	0.6627	0.6348	0.8727	1.169	0.4724	4.74e-05	0.00185	0.1922	0.01507	0.2703	C	T	intronic	TTLL11	.	.	9	121865978	4.74e-05	0.00185	0.1922	0.01507	0.2703	T	C	0.2979	940	0.3982	334	0.2426	606	0.346	500	0.4223	206	0.2925	294	0.1364	220	0.2593	54	0.09639	166	0.2105	76	0.3	20
rs4837907	9	121868319	0.6715	0.6465	0.8727	1.177	0.4724	3.77e-05	0.001526	0.1922	0.01458	0.2703	T	C	intronic	TTLL11	.	.	9	121868319	3.77e-05	0.001526	0.1922	0.01458	0.2703	C	T	0.2962	942	0.3982	334	0.2401	608	0.344	500	0.4223	206	0.2891	294	0.1351	222	0.2593	54	0.09524	168	0.2105	76	0.3	20
rs4384052	9	121870456	0.6715	0.6465	0.8727	1.177	0.4724	3.77e-05	0.001526	0.1922	0.01458	0.2703	T	C	intronic	TTLL11	.	.	9	121870456	3.77e-05	0.001526	0.1922	0.01458	0.2703	C	T	0.2962	942	0.3982	334	0.2401	608	0.344	500	0.4223	206	0.2891	294	0.1351	222	0.2593	54	0.09524	168	0.2105	76	0.3	20
rs4370602	9	121870817	0.6604	0.6465	0.6346	1.177	0.4724	5.62e-05	0.001526	0.3917	0.01458	0.2703	A	G	intronic	TTLL11	.	.	9	121870817	5.62e-05	0.001526	0.3917	0.01458	0.2703	G	A	0.2951	942	0.3952	334	0.2401	608	0.344	500	0.4223	206	0.2891	294	0.1351	222	0.2593	54	0.09524	168	0.1974	76	0.25	20
rs4390017	9	121871432	0.6604	0.6465	0.6346	1.177	0.4724	5.62e-05	0.001526	0.3917	0.01458	0.2703	T	C	intronic	TTLL11	.	.	9	121871432	5.62e-05	0.001526	0.3917	0.01458	0.2703	C	T	0.2941	942	0.3922	334	0.2401	608	0.344	500	0.4223	206	0.2891	294	0.1351	222	0.2593	54	0.09524	168	0.1974	76	0.25	20
rs7860920	9	121871543	0.6715	0.6465	0.8727	1.177	0.4724	3.77e-05	0.001526	0.1922	0.01458	0.2703	C	T	intronic	TTLL11	.	.	9	121871543	3.77e-05	0.001526	0.1922	0.01458	0.2703	T	C	0.2962	942	0.3982	334	0.2401	608	0.344	500	0.4223	206	0.2891	294	0.1351	222	0.2593	54	0.09524	168	0.2105	76	0.3	20
rs6478543	9	121872225	0.6715	0.6465	0.8727	1.177	0.4724	3.77e-05	0.001526	0.1922	0.01458	0.2703	C	G	intronic	TTLL11	.	.	9	121872225	3.77e-05	0.001526	0.1922	0.01458	0.2703	G	C	0.2962	942	0.3982	334	0.2401	608	0.344	500	0.4223	206	0.2891	294	0.1351	222	0.2593	54	0.09524	168	0.2105	76	0.3	20
rs10985427	9	121873458	0.7098	0.6802	NA	1.311	0.4724	1.36e-05	0.0008979	NA	0.006202	0.2703	T	C	intronic	TTLL11	.	.	9	121873458	1.36e-05	0.0008979	NA	0.006202	0.2703	C	T	0.3062	934	0.4102	334	0.2483	600	0.3448	496	0.4272	206	0.2862	290	0.1364	220	0.2778	54	0.09036	166	0.3243	74	0.4	20
rs7042308	9	121873693	0.697	0.6237	NA	1.284	0.4724	1.87e-05	0.002058	NA	0.007543	0.2703	C	T	intronic	TTLL11	.	.	9	121873693	1.87e-05	0.002058	NA	0.007543	0.2703	T	C	0.2981	926	0.4036	332	0.2391	594	0.3443	488	0.4216	204	0.2887	284	0.1376	218	0.2778	54	0.09146	164	0.2237	76	0.35	20
rs4240472	9	121875734	0.6338	0.7256	-0.128	1.221	0.3338	6.65e-05	0.0003544	0.8359	0.01139	0.4092	T	C	intronic	TTLL11	.	.	9	121875734	6.65e-05	0.0003544	0.8359	0.01139	0.4092	C	T	0.3567	942	0.4551	334	0.3026	608	0.3984	502	0.4903	206	0.3345	296	0.1486	222	0.2778	54	0.1071	168	0.4737	76	0.4	20
rs7046679	9	121876655	0.6762	0.6247	0.6846	1.28	0.4724	2.85e-05	0.002145	0.253	0.007351	0.2703	G	C	intronic	TTLL11	.	.	9	121876655	2.85e-05	0.002145	0.253	0.007351	0.2703	C	G	0.3057	942	0.4042	334	0.2516	608	0.346	500	0.4223	206	0.2925	294	0.1396	222	0.2778	54	0.09524	168	0.3158	76	0.4	20
rs10121618	9	121877508	0.7294	0.6564	1.078	1.28	0.4724	9.61e-06	0.001275	0.1338	0.007351	0.2703	T	C	intronic	TTLL11	.	.	9	121877508	9.61e-06	0.001275	0.1338	0.007351	0.2703	C	T	0.2962	942	0.4012	334	0.2385	608	0.342	500	0.4223	206	0.2857	294	0.1396	222	0.2778	54	0.09524	168	0.2237	76	0.35	20
rs4836869	9	121877641	0.6779	0.6674	0.3779	1.28	0.4724	3.24e-05	0.001086	0.5763	0.007351	0.2703	A	G	intronic	TTLL11	.	.	9	121877641	3.24e-05	0.001086	0.5763	0.007351	0.2703	G	A	0.3142	942	0.4132	334	0.2599	608	0.346	500	0.4272	206	0.2891	294	0.1396	222	0.2778	54	0.09524	168	0.3947	76	0.4	20
rs4837908	9	121877907	0.7256	0.651	1.078	1.28	0.4724	1.07e-05	0.001395	0.1338	0.007351	0.2703	G	C	intronic	TTLL11	.	.	9	121877907	1.07e-05	0.001395	0.1338	0.007351	0.2703	C	G	0.2968	940	0.4036	332	0.2385	608	0.3414	498	0.4216	204	0.2857	294	0.1396	222	0.2778	54	0.09524	168	0.2237	76	0.35	20
rs10760201	9	121879639	0.6763	0.6318	0.584	1.28	0.4244	3.12e-05	0.001951	0.3462	0.007351	0.3145	A	G	intronic	TTLL11	.	.	9	121879639	3.12e-05	0.001951	0.3462	0.007351	0.3145	G	A	0.3064	940	0.4072	334	0.2508	606	0.3454	498	0.4223	206	0.2911	292	0.1396	222	0.2778	54	0.09524	168	0.3026	76	0.4	20
rs7033841	9	121881038	0.7323	0.6717	1.078	1.185	0.4724	8.13e-06	0.0009706	0.1338	0.01114	0.2703	G	A	intronic	TTLL11	.	.	9	121881038	8.13e-06	0.0009706	0.1338	0.01114	0.2703	A	G	0.2966	944	0.4042	334	0.2377	610	0.3386	502	0.4223	206	0.2804	296	0.1441	222	0.2778	54	0.1012	168	0.2237	76	0.35	20
rs6478545	9	121881088	0.7277	0.6665	1.078	1.185	0.4724	9.32e-06	0.001063	0.1338	0.01114	0.2703	T	C	intronic	TTLL11	.	.	9	121881088	9.32e-06	0.001063	0.1338	0.01114	0.2703	C	T	0.2972	942	0.4042	334	0.2385	608	0.34	500	0.4223	206	0.2823	294	0.1441	222	0.2778	54	0.1012	168	0.2237	76	0.35	20
rs7037739	9	121881778	0.7277	0.6665	1.078	1.185	0.4724	9.32e-06	0.001063	0.1338	0.01114	0.2703	T	A	intronic	TTLL11	.	.	9	121881778	9.32e-06	0.001063	0.1338	0.01114	0.2703	A	T	0.2962	942	0.4012	334	0.2385	608	0.34	500	0.4223	206	0.2823	294	0.1441	222	0.2778	54	0.1012	168	0.2237	76	0.35	20
rs7038094	9	121881929	0.7277	0.6665	1.078	1.185	0.4724	9.32e-06	0.001063	0.1338	0.01114	0.2703	T	C	intronic	TTLL11	.	.	9	121881929	9.32e-06	0.001063	0.1338	0.01114	0.2703	C	T	0.2972	942	0.4042	334	0.2385	608	0.34	500	0.4223	206	0.2823	294	0.1441	222	0.2778	54	0.1012	168	0.2237	76	0.35	20
rs7038213	9	121882016	0.7193	0.6564	1.078	1.185	0.4724	1.19e-05	0.001275	0.1338	0.01114	0.2703	T	C	intronic	TTLL11	.	.	9	121882016	1.19e-05	0.001275	0.1338	0.01114	0.2703	C	T	0.2972	942	0.4012	334	0.2401	608	0.342	500	0.4223	206	0.2857	294	0.1441	222	0.2778	54	0.1012	168	0.2237	76	0.35	20
rs7070031	10	7322704	1.067	1.012	-0.4155	2.62	1.606	3.29e-05	0.0008748	0.7712	0.05851	0.01957	T	C	intronic	SFMBT2	.	.	10	7322704	3.29e-05	0.0008748	0.7712	0.05851	0.01957	T	C	0.08386	942	0.1407	334	0.05263	608	0.112	500	0.1699	206	0.07143	294	0.01351	222	0.03704	54	0.005952	168	0.05263	76	0.05	20
rs72775545	10	7334071	1.028	1.086	NA	1.573	1.606	0.0001218	0.0008003	NA	0.3012	0.01957	G	C	intronic	SFMBT2	.	.	10	7334071	0.0001218	0.0008003	NA	0.3012	0.01957	G	C	0.07553	940	0.1265	332	0.0477	608	0.1004	498	0.1569	204	0.06122	294	0.009009	222	0.01852	54	0.005952	168	0.03947	76	0	20
rs56390707	10	7334860	1.055	1.074	NA	1.573	1.972	9.2e-05	0.0008789	NA	0.3012	0.008755	T	A	intronic	SFMBT2	.	.	10	7334860	9.2e-05	0.0008789	NA	0.3012	0.008755	T	A	0.07431	942	0.1257	334	0.04605	608	0.1	500	0.1553	206	0.06122	294	0.009009	222	0.01852	54	0.005952	168	0.03947	76	0	20
rs72775547	10	7334861	1.055	1.074	NA	1.573	1.972	9.2e-05	0.0008789	NA	0.3012	0.008755	C	G	intronic	SFMBT2	.	.	10	7334861	9.2e-05	0.0008789	NA	0.3012	0.008755	C	G	0.07431	942	0.1257	334	0.04605	608	0.1	500	0.1553	206	0.06122	294	0.009009	222	0.01852	54	0.005952	168	0.03947	76	0	20
rs61837681	10	7340433	1.052	1.06	NA	1.757	1.972	9.75e-05	0.001025	NA	0.2501	0.008755	C	T	intronic	SFMBT2	.	.	10	7340433	9.75e-05	0.001025	NA	0.2501	0.008755	C	T	0.07479	936	0.1265	332	0.04636	604	0.1008	496	0.1553	206	0.06207	290	0.009091	220	0.01923	52	0.005952	168	0.03947	76	0	20
rs61837682	10	7342208	1.055	1.074	NA	1.573	1.972	9.2e-05	0.0008789	NA	0.3012	0.008755	C	T	intronic	SFMBT2	.	.	10	7342208	9.2e-05	0.0008789	NA	0.3012	0.008755	C	T	0.07431	942	0.1257	334	0.04605	608	0.1	500	0.1553	206	0.06122	294	0.009009	222	0.01852	54	0.005952	168	0.03947	76	0	20
rs74913709	10	7344186	1.141	1.204	NA	1.036	2.042	3.45e-05	0.000332	NA	0.443	0.007413	G	A	intronic	SFMBT2	.	.	10	7344186	3.45e-05	0.000332	NA	0.443	0.007413	G	A	0.07219	942	0.1257	334	0.04276	608	0.096	500	0.1553	206	0.05442	294	0.01351	222	0.01852	54	0.0119	168	0.03947	76	0	20
rs61837686	10	7345861	1.027	1.044	NA	1.036	2.042	0.0001109	0.0008771	NA	0.443	0.007413	T	C	intronic	SFMBT2	.	.	10	7345861	0.0001109	0.0008771	NA	0.443	0.007413	T	C	0.07415	944	0.1257	334	0.0459	610	0.0996	502	0.1553	206	0.06081	296	0.01351	222	0.01852	54	0.0119	168	0.03947	76	0	20
rs61837689	10	7347752	1.027	1.044	NA	1.036	2.042	0.0001109	0.0008771	NA	0.443	0.007413	C	T	intronic	SFMBT2	.	.	10	7347752	0.0001109	0.0008771	NA	0.443	0.007413	C	T	0.07415	944	0.1257	334	0.0459	610	0.0996	502	0.1553	206	0.06081	296	0.01351	222	0.01852	54	0.0119	168	0.03947	76	0	20
rs1749362	10	7348185	1.182	1.269	NA	1.036	2.042	2.2e-05	0.0002125	NA	0.443	0.007413	C	T	intronic	SFMBT2	.	.	10	7348185	2.2e-05	0.0002125	NA	0.443	0.007413	C	T	0.07113	942	0.1257	334	0.04112	608	0.094	500	0.1553	206	0.05102	294	0.01351	222	0.01852	54	0.0119	168	0.03947	76	0	20
rs1749361	10	7348252	1.179	1.261	NA	1.036	2.042	2.32e-05	0.0002291	NA	0.443	0.007413	A	G	intronic	SFMBT2	.	.	10	7348252	2.32e-05	0.0002291	NA	0.443	0.007413	A	G	0.07128	940	0.1257	334	0.04125	606	0.09438	498	0.1553	206	0.05137	292	0.01351	222	0.01852	54	0.0119	168	0.03947	76	0	20
rs2767693	10	7350056	1.101	1.145	NA	1.036	2.042	5.3e-05	0.000498	NA	0.443	0.007413	A	G	intronic	SFMBT2	.	.	10	7350056	5.3e-05	0.000498	NA	0.443	0.007413	A	G	0.07325	942	0.1257	334	0.04441	608	0.098	500	0.1553	206	0.05782	294	0.01351	222	0.01852	54	0.0119	168	0.03947	76	0	20
rs490818	10	7357191	1.058	1.138	NA	1.036	1.691	0.0001024	0.0005357	NA	0.443	0.02061	A	G	intronic	SFMBT2	.	.	10	7357191	0.0001024	0.0005357	NA	0.443	0.02061	A	G	0.07219	942	0.1228	334	0.04441	608	0.098	500	0.1553	206	0.05782	294	0.01351	222	0.01852	54	0.0119	168	0.03947	76	0	20
rs606477	10	7357399	1.058	1.138	NA	1.036	1.691	0.0001024	0.0005357	NA	0.443	0.02061	A	G	intronic	SFMBT2	.	.	10	7357399	0.0001024	0.0005357	NA	0.443	0.02061	A	G	0.07219	942	0.1228	334	0.04441	608	0.098	500	0.1553	206	0.05782	294	0.01351	222	0.01852	54	0.0119	168	0.03947	76	0	20
rs484300	10	7357874	1.058	1.138	NA	1.036	1.691	0.0001024	0.0005357	NA	0.443	0.02061	T	C	intronic	SFMBT2	.	.	10	7357874	0.0001024	0.0005357	NA	0.443	0.02061	T	C	0.07219	942	0.1228	334	0.04441	608	0.098	500	0.1553	206	0.05782	294	0.01351	222	0.01852	54	0.0119	168	0.03947	76	0	20
rs148106270	10	7360177	1.058	1.138	NA	1.036	1.691	0.0001024	0.0005357	NA	0.443	0.02061	A	AGT	intronic	SFMBT2	.	.	10	7360177	0.0001024	0.0005357	NA	0.443	0.02061	A	AGT	0.07219	942	0.1228	334	0.04441	608	0.098	500	0.1553	206	0.05782	294	0.01351	222	0.01852	54	0.0119	168	0.03947	76	0	20
rs1172702	10	7363567	1.089	1.183	NA	1.036	1.691	6.22e-05	0.000326	NA	0.443	0.02061	T	C	intronic	SFMBT2	.	.	10	7363567	6.22e-05	0.000326	NA	0.443	0.02061	T	C	0.07325	942	0.1257	334	0.04441	608	0.1	500	0.1602	206	0.05782	294	0.01351	222	0.01852	54	0.0119	168	0.03947	76	0	20
rs1183010	10	7363588	1.089	1.183	NA	1.036	1.691	6.22e-05	0.000326	NA	0.443	0.02061	T	C	intronic	SFMBT2	.	.	10	7363588	6.22e-05	0.000326	NA	0.443	0.02061	T	C	0.07325	942	0.1257	334	0.04441	608	0.1	500	0.1602	206	0.05782	294	0.01351	222	0.01852	54	0.0119	168	0.03947	76	0	20
rs2388049	10	7373669	1.014	1.18	NA	0.2056	1.691	5.73e-05	0.000107	NA	0.8679	0.02061	G	A	intronic	SFMBT2	.	.	10	7373669	5.73e-05	0.000107	NA	0.8679	0.02061	A	G	0.08936	940	0.1437	334	0.05941	606	0.124	500	0.1893	206	0.07823	294	0.02727	220	0.01852	54	0.03012	166	0.03947	76	0	20
rs2388050	10	7373812	1.014	1.18	NA	0.2143	1.691	5.7e-05	0.000107	NA	0.8624	0.02061	T	C	intronic	SFMBT2	.	.	10	7373812	5.7e-05	0.000107	NA	0.8624	0.02061	C	T	0.08917	942	0.1437	334	0.05921	608	0.124	500	0.1893	206	0.07823	294	0.02703	222	0.01852	54	0.02976	168	0.03947	76	0	20
rs12571252	10	12123802	-0.366	-0.8864	-0.4053	0.1876	-0.1419	0.01678	9.53e-05	0.516	0.5721	0.7077	A	G	downstream	DHTKD1	dist=581	.	10	12123802	0.01678	9.53e-05	0.516	0.5721	0.7077	G	A	0.3195	942	0.2545	334	0.3553	608	0.298	500	0.199	206	0.3673	294	0.2973	222	0.3333	54	0.2857	168	0.3947	76	0.35	20
rs111877042	10	12285714	1.741	1.536	NA	NA	0.5721	6.6e-05	0.002291	NA	NA	0.6825	A	G	intergenic	CDC123;CAMK1D	dist=35125;dist=63833	.	10	12285714	6.6e-05	0.002291	NA	NA	0.6825	A	G	0.03291	942	0.06886	334	0.01316	608	0.046	500	0.08252	206	0.02041	294	0.01351	222	0.05556	54	0	168	0.02632	76	0.1	20
rs4420215	10	42153494	-0.8233	-0.7531	-1.461	-1.884	-0.4029	7.38e-05	0.006181	0.1349	0.001249	0.4704	G	T	intergenic	NONE;LOC441666	dist=NONE;dist=178372	.	10	42153494	7.38e-05	0.006181	0.1349	0.001249	0.4704	G	T	0.2489	944	0.1856	334	0.2836	610	0.249	502	0.1942	206	0.2872	296	0.2387	222	0.1111	54	0.2798	168	0.2895	76	0.25	20
rs4418753	10	42153883	0.8455	1.188	1.335	-0.6689	1.181	0.0001007	5e-05	0.129	0.2542	0.05143	T	G	intergenic	NONE;LOC441666	dist=NONE;dist=177983	.	10	42153883	0.0001007	5e-05	0.129	0.2542	0.05143	T	G	0.1504	944	0.2006	334	0.123	610	0.1554	502	0.2233	206	0.1081	296	0.1441	222	0.09259	54	0.1607	168	0.1842	76	0.3	20
rs79176806	10	42172576	-0.7502	-1.133	-0.5053	-0.05099	-0.4023	0.0004301	6.94e-05	0.5776	0.9166	0.5127	C	G	intergenic	NONE;LOC441666	dist=NONE;dist=159290	.	10	42172576	0.0004301	6.94e-05	0.5776	0.9166	0.5127	C	G	0.2193	944	0.1677	334	0.2475	610	0.2291	502	0.1553	206	0.2804	296	0.1937	222	0.2037	54	0.1905	168	0.2895	76	0.2	20
rs28482394	10	42264603	-0.8673	-0.9972	NA	-0.6348	-1.065	6.19e-05	0.0004437	NA	0.2095	0.09801	A	G	intergenic	NONE;LOC441666	dist=NONE;dist=67263	.	10	42264603	6.19e-05	0.0004437	NA	0.2095	0.09801	A	G	0.3473	930	0.2957	328	0.3754	602	0.3279	494	0.2723	202	0.3664	292	0.3519	216	0.3077	52	0.3659	164	0.3816	76	0.35	20
C10_47950593	10	47950593	0.7913	0.8163	NA	2.333	0.2003	0.0002487	0.004371	NA	9.59e-05	0.7158	G	C	intergenic	NPY4R;FAM25C	dist=27069;dist=44729	.	10	47950593	0.0002487	0.004371	NA	9.59e-05	0.7158	G	C	0.2402	916	0.3062	320	0.2047	596	0.2927	492	0.3469	196	0.2568	296	0.119	210	0.25	52	0.07595	158	0.2778	72	0.2222	18
rs79861996	10	52736984	0.9161	0.9195	-0.1095	0.8556	1.227	0.0001096	0.005675	0.9411	0.05575	0.1082	G	A	ncRNA_intronic	LOC105378305	.	.	10	52736984	0.0001096	0.005675	0.9411	0.05575	0.1082	G	A	0.1125	942	0.1587	334	0.08717	608	0.102	500	0.1456	206	0.07143	294	0.1802	222	0.2593	54	0.1548	168	0.03947	76	0.05	20
rs72821477	10	81458953	1.31	1.147	2.084	3.106	-0.5729	9.73e-05	0.004008	0.07236	0.00962	0.6681	A	G	intergenic	LINC02655;NRG3	dist=805219;dist=416241	.	10	81458953	9.73e-05	0.004008	0.07236	0.00962	0.6681	A	G	0.05414	942	0.09281	334	0.03289	608	0.076	500	0.1117	206	0.05102	294	0.02252	222	0.07407	54	0.005952	168	0.06579	76	0.15	20
rs114889610	10	81492074	1.305	1.317	1.141	3.106	-0.5729	7.82e-05	0.001289	0.2595	0.00962	0.6681	C	T	intergenic	LINC02655;NRG3	dist=838340;dist=383120	.	10	81492074	7.82e-05	0.001289	0.2595	0.00962	0.6681	C	T	0.05839	942	0.09581	334	0.03783	608	0.076	500	0.1165	206	0.04762	294	0.02252	222	0.07407	54	0.005952	168	0.1184	76	0.15	20
rs116039670	10	81492266	1.305	1.317	1.141	3.106	-0.5729	7.82e-05	0.001289	0.2595	0.00962	0.6681	G	C	intergenic	LINC02655;NRG3	dist=838532;dist=382928	.	10	81492266	7.82e-05	0.001289	0.2595	0.00962	0.6681	G	C	0.05839	942	0.09581	334	0.03783	608	0.076	500	0.1165	206	0.04762	294	0.02252	222	0.07407	54	0.005952	168	0.1184	76	0.15	20
C10_M9961	10	81492581	1.305	1.317	1.141	3.106	-0.5729	7.82e-05	0.001289	0.2595	0.00962	0.6681	A	ATT	intergenic	LINC02655;NRG3	dist=838847;dist=382613	rs112412447	10	81492581	7.82e-05	0.001289	0.2595	0.00962	0.6681	ATT	A	0.05839	942	0.09581	334	0.03783	608	0.076	500	0.1165	206	0.04762	294	0.02252	222	0.07407	54	0.005952	168	0.1184	76	0.15	20
rs66490160	10	81492919	1.31	1.32	1.141	3.106	-0.5729	7.43e-05	0.001262	0.2595	0.00962	0.6681	T	A	intergenic	LINC02655;NRG3	dist=839185;dist=382275	.	10	81492919	7.43e-05	0.001262	0.2595	0.00962	0.6681	T	A	0.05826	944	0.09581	334	0.0377	610	0.0757	502	0.1165	206	0.0473	296	0.02252	222	0.07407	54	0.005952	168	0.1184	76	0.15	20
rs17549836	10	81492932	1.31	1.32	1.141	3.106	-0.5729	7.43e-05	0.001262	0.2595	0.00962	0.6681	G	A	intergenic	LINC02655;NRG3	dist=839198;dist=382262	.	10	81492932	7.43e-05	0.001262	0.2595	0.00962	0.6681	G	A	0.05826	944	0.09581	334	0.0377	610	0.0757	502	0.1165	206	0.0473	296	0.02252	222	0.07407	54	0.005952	168	0.1184	76	0.15	20
rs56127682	10	81493473	1.305	1.317	1.141	3.106	-0.5729	7.82e-05	0.001289	0.2595	0.00962	0.6681	C	T	intergenic	LINC02655;NRG3	dist=839739;dist=381721	.	10	81493473	7.82e-05	0.001289	0.2595	0.00962	0.6681	C	T	0.05839	942	0.09581	334	0.03783	608	0.076	500	0.1165	206	0.04762	294	0.02252	222	0.07407	54	0.005952	168	0.1184	76	0.15	20
rs55706018	10	81493631	1.305	1.317	1.141	3.094	-0.5729	7.89e-05	0.001289	0.2595	0.009925	0.6681	A	G	intergenic	LINC02655;NRG3	dist=839897;dist=381563	.	10	81493631	7.89e-05	0.001289	0.2595	0.009925	0.6681	A	G	0.05851	940	0.09581	334	0.03795	606	0.076	500	0.1165	206	0.04762	294	0.02273	220	0.07407	54	0.006024	166	0.1184	76	0.15	20
rs72823983	10	81494820	1.312	1.153	2.084	3.106	-0.5729	9.65e-05	0.003924	0.07236	0.00962	0.6681	T	C	intergenic	LINC02655;NRG3	dist=841086;dist=380374	.	10	81494820	9.65e-05	0.003924	0.07236	0.00962	0.6681	T	C	0.05414	942	0.09281	334	0.03289	608	0.076	500	0.1117	206	0.05102	294	0.02252	222	0.07407	54	0.005952	168	0.06579	76	0.15	20
rs72823989	10	81499271	1.315	1.155	2.084	3.106	-0.5729	9.26e-05	0.003889	0.07236	0.00962	0.6681	C	T	intergenic	LINC02655;NRG3	dist=845537;dist=375923	.	10	81499271	9.26e-05	0.003889	0.07236	0.00962	0.6681	C	T	0.05403	944	0.09281	334	0.03279	610	0.0757	502	0.1117	206	0.05068	296	0.02252	222	0.07407	54	0.005952	168	0.06579	76	0.15	20
rs66991696	10	81500217	1.305	1.326	1.141	3.094	-0.6047	8.09e-05	0.001266	0.2595	0.009925	0.649	A	G	intergenic	LINC02655;NRG3	dist=846483;dist=374977	.	10	81500217	8.09e-05	0.001266	0.2595	0.009925	0.649	A	G	0.05876	936	0.09581	334	0.03821	602	0.07631	498	0.1165	206	0.04795	292	0.02273	220	0.07407	54	0.006024	166	0.1184	76	0.15	20
rs72823991	10	81501070	1.315	1.155	2.084	3.106	-0.5729	9.26e-05	0.003889	0.07236	0.00962	0.6681	T	C	intergenic	LINC02655;NRG3	dist=847336;dist=374124	.	10	81501070	9.26e-05	0.003889	0.07236	0.00962	0.6681	T	C	0.05403	944	0.09281	334	0.03279	610	0.0757	502	0.1117	206	0.05068	296	0.02252	222	0.07407	54	0.005952	168	0.06579	76	0.15	20
rs72823997	10	81504089	1.312	1.153	2.084	3.106	-0.5729	9.65e-05	0.003924	0.07236	0.00962	0.6681	C	A	intergenic	LINC02655;NRG3	dist=850355;dist=371105	.	10	81504089	9.65e-05	0.003924	0.07236	0.00962	0.6681	C	A	0.05414	942	0.09281	334	0.03289	608	0.076	500	0.1117	206	0.05102	294	0.02252	222	0.07407	54	0.005952	168	0.06579	76	0.15	20
rs72825805	10	81509134	1.312	1.153	2.084	3.106	-0.5729	9.65e-05	0.003924	0.07236	0.00962	0.6681	T	C	intergenic	LINC02655;NRG3	dist=855400;dist=366060	.	10	81509134	9.65e-05	0.003924	0.07236	0.00962	0.6681	T	C	0.05414	942	0.09281	334	0.03289	608	0.076	500	0.1117	206	0.05102	294	0.02252	222	0.07407	54	0.005952	168	0.06579	76	0.15	20
rs61873380	10	125905721	-0.8414	-1.027	-1.944	-0.6124	-0.6054	8.8e-05	0.0003815	0.06159	0.2288	0.334	T	C	intronic	FANK1	.	.	10	125905721	8.8e-05	0.0003815	0.06159	0.2288	0.334	T	C	0.3379	944	0.2904	334	0.3639	610	0.3347	502	0.2767	206	0.375	296	0.3288	222	0.3148	54	0.3333	168	0.2895	76	0.15	20
rs77740910	10	125917102	-1.134	-1.354	-2.162	-0.7593	-1.074	8.04e-08	2.01e-06	0.08116	0.1158	0.05906	T	C	intronic	FANK1	.	.	10	125917102	8.04e-08	2.01e-06	0.08116	0.1158	0.05906	T	C	0.2834	942	0.2096	334	0.324	608	0.286	500	0.199	206	0.3469	294	0.2658	222	0.2222	54	0.2798	168	0.2237	76	0.1	20
rs73368612	10	125924532	-1.019	-1.215	-0.8816	-0.6823	-1.884	1.45e-06	1.84e-05	0.339	0.1765	0.003796	G	T	intronic	FANK1	.	.	10	125924532	1.45e-06	1.84e-05	0.339	0.1765	0.003796	G	T	0.3163	942	0.2455	334	0.3553	608	0.308	500	0.233	206	0.3605	294	0.3288	222	0.2963	54	0.3393	168	0.25	76	0.2	20
rs11146276	10	132260883	-0.4918	-0.8292	0.003069	0.6701	-0.3627	0.001924	4.21e-05	0.9961	0.1369	0.4634	C	T	intronic	STK32C	.	.	10	132260883	0.001924	4.21e-05	0.9961	0.1369	0.4634	C	T	0.3857	936	0.3464	332	0.4073	604	0.4799	498	0.3786	206	0.4486	292	0.1773	220	0.2308	52	0.1607	168	0.3684	76	0.35	20
rs4755555	11	40601096	0.4763	-0.7895	-0.1498	0.4931	-0.4887	0.00156	8.61e-05	0.8383	0.2097	0.241	C	T	intronic	LRRC4C	.	.	11	40601096	0.00156	8.61e-05	0.8383	0.2097	0.241	C	T	0.4618	942	0.4431	334	0.4095	608	0.446	500	0.3398	206	0.4796	294	0.2703	222	0.3519	54	0.244	168	0.2763	76	0.25	20
rs11035954	11	40601387	0.4763	-0.7895	-0.1498	0.4931	-0.4887	0.00156	8.61e-05	0.8383	0.2097	0.241	G	T	intronic	LRRC4C	.	.	11	40601387	0.00156	8.61e-05	0.8383	0.2097	0.241	G	T	0.4628	942	0.4401	334	0.4095	608	0.446	500	0.3398	206	0.4796	294	0.2703	222	0.3519	54	0.244	168	0.2763	76	0.25	20
rs2861991	11	40601976	0.4797	-0.7895	-0.1498	0.5008	-0.4887	0.001412	8.61e-05	0.8383	0.2002	0.241	T	G	intronic	LRRC4C	.	.	11	40601976	0.001412	8.61e-05	0.8383	0.2002	0.241	T	G	0.4607	942	0.4431	334	0.4079	608	0.446	500	0.3398	206	0.4796	294	0.2658	222	0.3519	54	0.2381	168	0.2763	76	0.25	20
rs7115891	11	40608915	0.5594	-0.7813	1.181	0.6086	-0.4887	0.0002077	9.52e-05	0.09031	0.123	0.241	A	G	intronic	LRRC4C	.	.	11	40608915	0.0002077	9.52e-05	0.09031	0.123	0.241	G	A	0.4819	940	0.4162	334	0.4257	606	0.4398	498	0.335	206	0.4863	292	0.2703	222	0.3704	54	0.2381	168	0.4868	76	0.4	20
rs7928562	11	40610077	0.5032	-0.7895	-0.1498	0.6086	-0.4385	0.000839	8.61e-05	0.8383	0.123	0.2931	A	T	intronic	LRRC4C	.	.	11	40610077	0.000839	8.61e-05	0.8383	0.123	0.2931	A	T	0.4606	940	0.4398	332	0.4062	608	0.446	500	0.3398	206	0.4796	294	0.2703	222	0.3704	54	0.2381	168	0.2632	76	0.2	20
rs4366471	11	40610833	0.4921	-0.786	-0.2049	0.631	-0.5122	0.001054	9.12e-05	0.7807	0.1102	0.2198	C	T	intronic	LRRC4C	.	.	11	40610833	0.001054	9.12e-05	0.7807	0.1102	0.2198	C	T	0.4624	930	0.4401	334	0.4077	596	0.4478	498	0.3447	206	0.4795	292	0.2661	218	0.3704	54	0.2317	164	0.2838	74	0.25	20
rs2861925	11	40614463	0.5032	-0.7895	-0.1498	0.6086	-0.4385	0.000839	8.61e-05	0.8383	0.123	0.2931	T	C	intronic	LRRC4C	.	.	11	40614463	0.000839	8.61e-05	0.8383	0.123	0.2931	T	C	0.4607	942	0.4401	334	0.4062	608	0.446	500	0.3398	206	0.4796	294	0.2703	222	0.3704	54	0.2381	168	0.2763	76	0.25	20
C11_M5555	11	40621540	0.4996	-0.7895	-0.1498	0.6286	-0.4887	0.0009083	8.61e-05	0.8383	0.1119	0.241	C	CT	intronic	LRRC4C	.	rs35143072	11	40621540	0.0009083	8.61e-05	0.8383	0.1119	0.241	CT	C	0.4617	940	0.4401	334	0.4076	606	0.446	500	0.3398	206	0.4796	294	0.2682	220	0.3704	54	0.2349	166	0.2763	76	0.25	20
rs11035964	11	40622205	0.5047	-0.7996	-0.5707	0.538	-0.3949	0.0008833	6.68e-05	0.5797	0.1777	0.3432	A	G	intronic	LRRC4C	.	.	11	40622205	0.0008833	6.68e-05	0.5797	0.1777	0.3432	A	G	0.4502	944	0.4491	334	0.3951	610	0.4482	502	0.3398	206	0.4764	296	0.2658	222	0.3519	54	0.2381	168	0.1842	76	0.15	20
rs56948633	11	40622364	0.5032	-0.7895	-0.1498	0.6086	-0.4385	0.000839	8.61e-05	0.8383	0.123	0.2931	A	AG	intronic	LRRC4C	.	rs143638241	11	40622364	0.000839	8.61e-05	0.8383	0.123	0.2931	AG	A	0.4607	942	0.4401	334	0.4062	608	0.446	500	0.3398	206	0.4796	294	0.2703	222	0.3704	54	0.2381	168	0.2763	76	0.25	20
rs11035966	11	40624517	0.4962	-0.7895	-0.1498	0.6086	-0.4887	0.0009786	8.61e-05	0.8383	0.123	0.241	T	C	intronic	LRRC4C	.	.	11	40624517	0.0009786	8.61e-05	0.8383	0.123	0.241	T	C	0.4628	942	0.4371	334	0.4079	608	0.446	500	0.3398	206	0.4796	294	0.2703	222	0.3704	54	0.2381	168	0.2763	76	0.25	20
rs12226364	11	40624530	0.4979	-0.7919	-0.1498	0.6086	-0.4887	0.0009463	8.36e-05	0.8383	0.123	0.241	T	C	intronic	LRRC4C	.	.	11	40624530	0.0009463	8.36e-05	0.8383	0.123	0.241	T	C	0.4629	944	0.4371	334	0.4082	610	0.4462	502	0.3398	206	0.4797	296	0.2703	222	0.3704	54	0.2381	168	0.2763	76	0.25	20
rs4523685	11	40630105	0.4942	-0.7919	-0.2833	0.5851	-0.4786	0.001048	8.36e-05	0.7128	0.1367	0.2698	C	T	intronic	LRRC4C	.	.	11	40630105	0.001048	8.36e-05	0.7128	0.1367	0.2698	C	T	0.466	940	0.4371	334	0.4125	606	0.4462	502	0.3398	206	0.4797	296	0.2727	220	0.3704	54	0.241	166	0.2895	76	0.25	20
rs7116136	11	40630232	0.5391	-0.8292	0.7595	0.499	-0.5441	0.0003631	4.35e-05	0.2513	0.1974	0.2168	C	T	intronic	LRRC4C	.	.	11	40630232	0.0003631	4.35e-05	0.2513	0.1974	0.2168	T	C	0.486	928	0.4152	330	0.4314	598	0.4337	498	0.3218	202	0.4899	296	0.285	214	0.3704	54	0.2562	160	0.3947	76	0.45	20
rs3943000	11	40632264	0.5441	-0.775	-0.2938	0.7116	-0.2148	0.0003641	8.99e-05	0.6976	0.08978	0.6163	G	C	intronic	LRRC4C	.	.	11	40632264	0.0003641	8.99e-05	0.6976	0.08978	0.6163	G	C	0.4395	942	0.4611	334	0.3849	608	0.484	500	0.3786	206	0.4422	294	0.2613	222	0.3704	54	0.2262	168	0.3026	76	0.25	20
rs1472306	11	40641480	0.7259	0.7293	0.8357	1.319	0.4151	7.61e-05	0.003013	0.4552	0.007114	0.2945	A	G	intronic	LRRC4C	.	.	11	40641480	7.61e-05	0.003013	0.4552	0.007114	0.2945	G	A	0.1953	942	0.2681	332	0.1557	610	0.1912	502	0.2476	206	0.152	296	0.1441	222	0.2593	54	0.1071	168	0.09211	76	0.15	20
rs35298296	11	40657634	0.7238	0.7278	0.5353	1.319	0.4522	7.55e-05	0.003041	0.6215	0.007114	0.2523	A	G	intronic	LRRC4C	.	.	11	40657634	7.55e-05	0.003041	0.6215	0.007114	0.2523	A	G	0.1975	942	0.2695	334	0.1579	608	0.196	500	0.2524	206	0.1565	294	0.1441	222	0.2593	54	0.1071	168	0.1053	76	0.15	20
rs2861930	11	40658995	0.7227	0.7455	0.5353	1.319	0.4151	8e-05	0.002508	0.6215	0.007114	0.2945	A	T	intronic	LRRC4C	.	.	11	40658995	8e-05	0.002508	0.6215	0.007114	0.2945	A	T	0.1979	940	0.2695	334	0.1584	606	0.1948	498	0.2524	206	0.1541	292	0.1441	222	0.2593	54	0.1071	168	0.1053	76	0.15	20
rs77632736	11	40669348	0.7275	0.7489	0.1136	1.236	0.4207	9.71e-05	0.002758	0.9321	0.01067	0.2998	T	G	intronic	LRRC4C	.	.	11	40669348	9.71e-05	0.002758	0.9321	0.01067	0.2998	T	G	0.1826	942	0.2515	334	0.1447	608	0.176	500	0.233	206	0.1361	294	0.1441	222	0.2593	54	0.1071	168	0.06579	76	0.1	20
rs12363870	11	94995731	0.6061	0.9356	1.423	-1.705	-0.0481	0.0004776	1.17e-05	0.2457	0.1395	0.9144	C	T	intronic	KDM4D	.	.	11	94995731	0.0004776	1.17e-05	0.2457	0.1395	0.9144	C	T	0.2691	944	0.3653	334	0.2164	610	0.3805	502	0.5	206	0.2973	296	0.05405	222	0.01852	54	0.06548	168	0.06579	76	0.1	20
rs75358904	11	102163463	-1.62	-1.314	NA	NA	NA	4.75e-05	0.001584	NA	NA	NA	G	A	intronic	YAP1	.	.	11	102163463	4.75e-05	0.001584	NA	NA	NA	G	A	0.07097	944	0.02994	334	0.09344	610	0.09562	502	0.04854	206	0.1284	296	0.01351	222	0	54	0.01786	168	0.05263	76	0	20
rs151190080	11	102199423	-1.678	-1.373	NA	NA	NA	7.46e-05	0.001945	NA	NA	NA	C	CT	intronic	YAP1	.	.	11	102199423	7.46e-05	0.001945	NA	NA	NA	C	CT	0.06369	942	0.02395	334	0.08553	608	0.086	500	0.03883	206	0.119	294	0.009009	222	0	54	0.0119	168	0.05263	76	0	20
rs77721353	11	102246441	-1.542	-1.375	NA	NA	NA	5.3e-06	0.0001133	NA	NA	NA	T	G	intergenic	YAP1;BIRC3	dist=13017;dist=71043	.	11	102246441	5.3e-06	0.0001133	NA	NA	NA	T	G	0.0913	942	0.03892	334	0.1201	608	0.134	500	0.06311	206	0.1837	294	0.01802	222	0	54	0.02381	168	0.06579	76	0	20
rs10891210	11	110969146	-0.4363	-1.174	0.3145	0.1455	0.08002	0.01278	4.51e-05	0.6084	0.6751	0.8467	T	G	intergenic	ARHGAP20;LINC02550	dist=255957;dist=122786	.	11	110969146	0.01278	4.51e-05	0.6084	0.6751	0.8467	G	T	0.2892	944	0.2246	334	0.3246	610	0.2151	502	0.1262	206	0.277	296	0.4099	222	0.4259	54	0.4048	168	0.2632	76	0.3	20
rs10892247	11	118619361	0.6538	0.5347	-0.2	0.8512	1.409	7.87e-05	0.01396	0.9002	0.02426	0.004446	A	G	intronic	PHLDB1	.	.	11	118619361	7.87e-05	0.01396	0.9002	0.02426	0.004446	A	G	0.2229	942	0.3084	334	0.176	608	0.234	500	0.2913	206	0.1939	294	0.2207	222	0.3333	54	0.1845	168	0.05263	76	0.1	20
rs11216937	11	118636760	0.6589	0.5553	-0.2	0.8835	1.409	7.32e-05	0.0119	0.9002	0.01831	0.004446	T	C	intronic	PHLDB1	.	.	11	118636760	7.32e-05	0.0119	0.9002	0.01831	0.004446	T	C	0.2245	940	0.3084	334	0.1782	606	0.2289	498	0.2864	206	0.1884	292	0.2387	222	0.3519	54	0.2024	168	0.05263	76	0.1	20
rs80015904	11	118646185	0.6405	0.5301	-0.2	0.9172	1.387	9.8e-05	0.01453	0.9002	0.01533	0.004949	A	G	intronic	PHLDB1	.	.	11	118646185	9.8e-05	0.01453	0.9002	0.01533	0.004949	A	G	0.2308	936	0.3152	330	0.1848	606	0.2369	498	0.2941	204	0.1973	294	0.2431	218	0.3654	52	0.2048	166	0.05263	76	0.1	20
rs61409027	11	120898769	0.7408	0.6293	1.14	1.28	0.6337	4.64e-05	0.01914	0.1558	0.001024	0.1787	T	C	intronic	GRIK4	.	.	11	120898769	4.64e-05	0.01914	0.1558	0.001024	0.1787	T	C	0.2123	942	0.2725	334	0.1793	608	0.158	500	0.2087	206	0.1224	294	0.3694	222	0.4444	54	0.3095	168	0.1316	76	0.2	20
rs7106413	11	120899234	0.7136	0.6293	1.14	1.227	0.6337	7.57e-05	0.01914	0.1558	0.001504	0.1787	T	C	intronic	GRIK4	.	.	11	120899234	7.57e-05	0.01914	0.1558	0.001504	0.1787	T	C	0.2144	942	0.2725	334	0.1826	608	0.158	500	0.2087	206	0.1224	294	0.3784	222	0.4444	54	0.3214	168	0.1316	76	0.2	20
rs57510128	11	133537483	0.79	0.8231	-1.832	0.8373	1.289	1.3e-05	0.002183	0.08455	0.01807	0.01032	T	C	intergenic	OPCML;LINC02743	dist=4982;dist=246188	.	11	133537483	1.3e-05	0.002183	0.08455	0.01807	0.01032	T	C	0.2272	942	0.2814	334	0.1974	608	0.162	500	0.2184	206	0.1224	294	0.2703	222	0.3889	54	0.2321	168	0.4342	76	0.45	20
rs6486903	12	8215617	0.1642	-0.3288	-0.7109	-2.058	-0.2908	0.3168	0.1293	0.3822	9.91e-05	0.4905	G	C	intergenic	FAM66C;FAM90A1	dist=14617;dist=5643	.	12	8215617	0.3168	0.1293	0.3822	9.91e-05	0.4905	C	G	0.483	942	0.479	334	0.4852	608	0.4	500	0.3592	206	0.4286	294	0.3964	222	0.2037	54	0.4583	168	0.4605	76	0.4	20
rs7975450	12	8218319	-0.3476	-0.1433	-2.652	-1.997	-0.3799	0.04045	0.5197	0.02478	6.69e-05	0.4099	C	T	intergenic	FAM66C;FAM90A1	dist=17319;dist=2941	.	12	8218319	0.04045	0.5197	0.02478	6.69e-05	0.4099	T	C	0.4905	944	0.491	334	0.4803	610	0.4243	502	0.4029	206	0.4392	296	0.4324	222	0.2222	54	0.5	168	0.4211	76	0.3	20
rs143854920	12	8393493	-0.9225	-0.8739	0.08542	-1.454	-0.945	1.38e-05	0.001889	0.9242	0.004086	0.0935	C	G	intergenic	LINC00937;CLEC6A	dist=2741;dist=62469	.	12	8393493	1.38e-05	0.001889	0.9242	0.004086	0.0935	C	G	0.304	944	0.2485	334	0.3344	610	0.3187	502	0.2621	206	0.3581	296	0.2928	222	0.1667	54	0.3333	168	0.2105	76	0.25	20
rs75749634	12	11030279	0.8267	0.9583	0.961	0.5299	0.8047	9.04e-05	0.0005926	0.332	0.3058	0.1386	A	T	ncRNA_intronic	PRH1-PRR4	.	.	12	11030279	9.04e-05	0.0005926	0.332	0.3058	0.1386	A	T	0.2595	944	0.3144	334	0.2295	610	0.257	502	0.3204	206	0.2128	296	0.3108	222	0.3519	54	0.2976	168	0.1711	76	0.25	20
rs10845799	12	13529574	-0.6419	-0.8899	-0.8728	0.9589	-0.4444	0.0005941	8.04e-05	0.4233	0.09452	0.4552	C	T	intergenic	LINC01559;GRIN2B	dist=152829;dist=7763	.	12	13529574	0.0005941	8.04e-05	0.4233	0.09452	0.4552	C	T	0.2389	942	0.2126	334	0.2533	608	0.35	500	0.267	206	0.4082	294	0.08108	222	0.1296	54	0.06548	168	0.1579	76	0.1	20
rs1012587	12	13701980	0.5668	0.9299	-0.09672	0.2245	0.476	0.0004634	5.43e-05	0.8766	0.5169	0.4223	A	T	intronic	GRIN2B	.	.	12	13701980	0.0004634	5.43e-05	0.8766	0.5169	0.4223	A	T	0.2346	942	0.2934	334	0.2023	608	0.236	500	0.335	206	0.1667	294	0.2838	222	0.2778	54	0.2857	168	0.3289	76	0.35	20
rs2199621	12	29724245	0.575	0.6939	1.112	0.3066	0.3039	8.38e-05	0.0002912	0.1174	0.3869	0.4339	C	T	intronic	TMTC1	.	.	12	29724245	8.38e-05	0.0002912	0.1174	0.3869	0.4339	C	T	0.4055	942	0.494	334	0.3569	608	0.434	500	0.466	206	0.3639	294	0.3739	222	0.4259	54	0.3571	168	0.3684	76	0.5	20
rs10083018	12	29724329	0.575	0.6939	1.112	0.3066	0.3039	8.38e-05	0.0002912	0.1174	0.3869	0.4339	G	A	intronic	TMTC1	.	.	12	29724329	8.38e-05	0.0002912	0.1174	0.3869	0.4339	G	A	0.4055	942	0.494	334	0.3569	608	0.434	500	0.466	206	0.3639	294	0.3739	222	0.4259	54	0.3571	168	0.3684	76	0.5	20
rs10082801	12	29724531	0.5893	0.6616	0.9117	0.4599	0.3046	4.06e-05	0.000443	0.2129	0.1705	0.4129	G	C	intronic	TMTC1	.	.	12	29724531	4.06e-05	0.000443	0.2129	0.1705	0.4129	G	C	0.4363	942	0.476	334	0.3882	608	0.446	500	0.4563	206	0.3776	294	0.4459	222	0.463	54	0.4167	168	0.4605	76	0.4	20
rs4931214	12	29724632	0.5715	0.6939	1.374	0.3194	0.2141	9.12e-05	0.0002912	0.08421	0.3656	0.5717	A	T	intronic	TMTC1	.	.	12	29724632	9.12e-05	0.0002912	0.08421	0.3656	0.5717	A	T	0.4023	942	0.491	334	0.3536	608	0.434	500	0.466	206	0.3639	294	0.3694	222	0.4259	54	0.3512	168	0.3553	76	0.5	20
rs302364	12	29725308	0.5788	0.6862	1.374	0.376	0.2141	7.45e-05	0.0003428	0.08421	0.2791	0.5717	C	T	intronic	TMTC1	.	.	12	29725308	7.45e-05	0.0003428	0.08421	0.2791	0.5717	C	T	0.4045	942	0.494	334	0.3553	608	0.436	500	0.466	206	0.3673	294	0.3739	222	0.4444	54	0.3512	168	0.3553	76	0.5	20
rs302365	12	29725397	0.5903	0.6702	1.374	0.4499	0.1705	6.45e-05	0.0005833	0.08421	0.1882	0.6598	G	C	intronic	TMTC1	.	.	12	29725397	6.45e-05	0.0005833	0.08421	0.1882	0.6598	G	C	0.3737	942	0.4581	334	0.3273	608	0.39	500	0.4806	206	0.3265	294	0.3604	222	0.4444	54	0.3333	168	0.3553	76	0.5	20
rs61800	12	29726368	0.5888	0.7153	1.388	0.285	0.2141	5.3e-05	0.0001795	0.07358	0.4181	0.5717	T	C	intronic	TMTC1	.	.	12	29726368	5.3e-05	0.0001795	0.07358	0.4181	0.5717	T	C	0.3992	942	0.491	334	0.3487	608	0.43	500	0.466	206	0.3571	294	0.3694	222	0.4259	54	0.3512	168	0.3421	76	0.5	20
rs61801	12	29726451	0.5812	0.7039	1.388	0.285	0.2141	6.71e-05	0.0002314	0.07358	0.4181	0.5717	T	C	intronic	TMTC1	.	.	12	29726451	6.71e-05	0.0002314	0.07358	0.4181	0.5717	T	C	0.4002	942	0.491	334	0.3503	608	0.432	500	0.466	206	0.3605	294	0.3694	222	0.4259	54	0.3512	168	0.3421	76	0.5	20
rs61802	12	29726467	0.5753	0.6939	1.388	0.285	0.2141	8.11e-05	0.0002912	0.07358	0.4181	0.5717	A	G	intronic	TMTC1	.	.	12	29726467	8.11e-05	0.0002912	0.07358	0.4181	0.5717	A	G	0.4013	942	0.491	334	0.352	608	0.434	500	0.466	206	0.3639	294	0.3694	222	0.4259	54	0.3512	168	0.3421	76	0.5	20
rs182487	12	29727104	0.5768	0.6702	1.388	0.3702	0.1288	9.71e-05	0.0005833	0.07358	0.2829	0.7412	T	C	intronic	TMTC1	.	.	12	29727104	9.71e-05	0.0005833	0.07358	0.2829	0.7412	T	C	0.3723	940	0.4551	334	0.3267	606	0.39	500	0.4806	206	0.3265	294	0.3545	220	0.4259	54	0.3313	166	0.3421	76	0.5	20
rs177348	12	29727388	0.5753	0.6939	1.388	0.285	0.2141	8.11e-05	0.0002912	0.07358	0.4181	0.5717	A	T	intronic	TMTC1	.	.	12	29727388	8.11e-05	0.0002912	0.07358	0.4181	0.5717	A	T	0.4013	942	0.491	334	0.352	608	0.434	500	0.466	206	0.3639	294	0.3694	222	0.4259	54	0.3512	168	0.3421	76	0.5	20
rs188552	12	29727612	0.5778	0.6702	1.388	0.3437	0.1705	9.41e-05	0.0005833	0.07358	0.3218	0.6598	A	G	intronic	TMTC1	.	.	12	29727612	9.41e-05	0.0005833	0.07358	0.3218	0.6598	A	G	0.3723	940	0.4551	334	0.3267	606	0.39	500	0.4806	206	0.3265	294	0.3591	220	0.4259	54	0.3373	166	0.3421	76	0.5	20
C12_34832931	12	34832931	1.093	1.069	1.09	2.392	1.053	3.32e-05	0.0006318	0.325	0.02201	0.1637	T	C	intergenic	ALG10;NONE	dist=804630;dist=NONE	.	12	34832931	3.32e-05	0.0006318	0.325	0.02201	0.1637	T	C	0.08369	944	0.1407	334	0.05246	610	0.1155	502	0.1748	206	0.07432	296	0.02703	222	0.05556	54	0.01786	168	0.06579	76	0.1	20
C12_37258293	12	37258293	1.108	1.031	1.766	1.959	1.426	2.74e-05	0.0008772	0.1525	0.04453	0.08212	A	C	intergenic	NONE;ALG10B	dist=NONE;dist=1058481	.	12	37258293	2.74e-05	0.0008772	0.1525	0.04453	0.08212	A	C	0.08404	940	0.1416	332	0.05263	608	0.118	500	0.1765	204	0.0777	296	0.03153	222	0.05556	54	0.02381	168	0.05263	76	0.1	20
C12_37264007	12	37264007	1.089	1.054	1.766	1.959	1.053	3.08e-05	0.0006309	0.1525	0.04453	0.1637	T	A	intergenic	NONE;ALG10B	dist=NONE;dist=1052767	.	12	37264007	3.08e-05	0.0006309	0.1525	0.04453	0.1637	T	A	0.08599	942	0.1437	334	0.05428	608	0.12	500	0.1796	206	0.07823	294	0.03153	222	0.05556	54	0.02381	168	0.05263	76	0.1	20
C12_37284758	12	37284758	1.117	1.015	NA	1.959	1.053	2.78e-05	0.001025	NA	0.04453	0.1637	T	C	intergenic	NONE;ALG10B	dist=NONE;dist=1032016	.	12	37284758	2.78e-05	0.001025	NA	0.04453	0.1637	T	C	0.0828	942	0.1407	334	0.05099	608	0.118	500	0.1748	206	0.07823	294	0.03153	222	0.05556	54	0.02381	168	0.02632	76	0.1	20
C12_37289504	12	37289504	1.033	1.02	1.09	1.959	1.053	6.99e-05	0.0009774	0.325	0.04453	0.1637	C	G	intergenic	NONE;ALG10B	dist=NONE;dist=1027270	.	12	37289504	6.99e-05	0.0009774	0.325	0.04453	0.1637	C	G	0.08475	944	0.1407	334	0.0541	610	0.1155	502	0.1748	206	0.07432	296	0.03153	222	0.05556	54	0.02381	168	0.06579	76	0.1	20
C12_37341768	12	37341768	1.037	1.073	1.09	1.959	0.8543	6.16e-05	0.0006145	0.325	0.04453	0.2005	T	C	intergenic	NONE;ALG10B	dist=NONE;dist=975006	.	12	37341768	6.16e-05	0.0006145	0.325	0.04453	0.2005	T	C	0.08493	942	0.1407	334	0.05428	608	0.116	500	0.1748	206	0.07483	294	0.03153	222	0.05556	54	0.02381	168	0.06579	76	0.1	20
C12_37412858	12	37412858	1.049	0.9714	NA	1.959	0.7436	5.98e-05	0.00118	NA	0.04453	0.3367	C	T	intergenic	NONE;ALG10B	dist=NONE;dist=903916	.	12	37412858	5.98e-05	0.00118	NA	0.04453	0.3367	C	T	0.08369	944	0.1407	334	0.05246	610	0.1215	502	0.1796	206	0.08108	296	0.03153	222	0.05556	54	0.02381	168	0.02632	76	0.1	20
C12_37413063	12	37413063	1.27	1.213	NA	2.392	0.999	8.47e-06	0.000212	NA	0.02218	0.2272	G	T	intergenic	NONE;ALG10B	dist=NONE;dist=903711	.	12	37413063	8.47e-06	0.000212	NA	0.02218	0.2272	G	T	0.07203	944	0.1317	334	0.03934	610	0.1056	502	0.1699	206	0.06081	296	0.02703	222	0.05556	54	0.01786	168	0.01316	76	0.05	20
C12_37413070	12	37413070	1.238	1.173	NA	2.392	0.999	1.46e-05	0.0003494	NA	0.02218	0.2272	A	T	intergenic	NONE;ALG10B	dist=NONE;dist=903704	.	12	37413070	1.46e-05	0.0003494	NA	0.02218	0.2272	A	T	0.07097	944	0.1287	334	0.03934	610	0.1036	502	0.165	206	0.06081	296	0.02703	222	0.05556	54	0.01786	168	0.01316	76	0.05	20
rs12425711	12	37569561	1.073	1.046	NA	2.549	-0.02156	0.0001001	0.0007793	NA	0.04393	0.9802	A	G	intergenic	NONE;ALG10B	dist=NONE;dist=747213	.	12	37569561	0.0001001	0.0007793	NA	0.04393	0.9802	A	G	0.07419	930	0.1295	332	0.04348	598	0.1138	492	0.1748	206	0.06993	286	0.01835	218	0.03846	52	0.01205	166	0.02632	76	0.1	20
rs7485383	12	39678301	0.4996	0.3158	NA	1.854	-0.0332	0.003712	0.153	NA	9.63e-05	0.9494	A	G	intronic	C12orf40	.	.	12	39678301	0.003712	0.153	NA	9.63e-05	0.9494	G	A	0.2957	930	0.3313	332	0.2759	598	0.2661	496	0.2961	206	0.2448	290	0.3818	220	0.3654	52	0.3036	168	0.3784	74	0.25	20
rs77044712	12	42105890	0.8871	0.7439	1.72	1.068	0.7331	5.9e-05	0.0094	0.06255	0.03735	0.245	T	A	exonic	GXYLT1	.	.	12	42105890	5.9e-05	0.0094	0.06255	0.03735	0.245	T	A	0.1483	944	0.2126	334	0.1131	610	0.1594	502	0.2136	206	0.1216	296	0.1351	222	0.2222	54	0.1071	168	0.1579	76	0.25	20
rs6538413	12	93355349	0.2105	-0.2474	-0.5543	0.2941	2.27	0.1672	0.2518	0.4252	0.3929	9.95e-05	T	G	ncRNA_intronic	LOC643339	.	.	12	93355349	0.1672	0.2518	0.4252	0.3929	9.95e-05	T	G	0.3238	942	0.3503	334	0.3092	608	0.284	500	0.2524	206	0.3061	294	0.3288	222	0.3704	54	0.3155	168	0.2632	76	0.2	20
rs117408018	12	120653597	1.221	1.554	1.843	-0.5275	-0.5889	5.8e-06	7.89e-07	0.2511	0.6608	0.6246	A	G	intronic	CABP1	.	.	12	120653597	5.8e-06	7.89e-07	0.2511	0.6608	0.6246	A	G	0.08917	942	0.1527	334	0.05428	608	0.14	500	0.2282	206	0.07823	294	0.02703	222	0.01852	54	0.02976	168	0.02632	76	0.05	20
rs73214174	12	121045396	0.5891	0.4528	0.3676	2.278	0.0394	0.005363	0.08013	0.7338	9.53e-05	0.9559	G	T	intergenic	OASL;P2RX7	dist=6154;dist=87480	.	12	121045396	0.005363	0.08013	0.7338	9.53e-05	0.9559	G	T	0.1446	906	0.1933	326	0.1172	580	0.1912	476	0.225	200	0.1667	276	0.09813	214	0.2308	52	0.05556	162	0.1111	72	0.1	20
rs7975253	12	121375864	1.173	1.067	2.182	0.01715	2.888	7.19e-05	0.002469	0.05429	0.9888	0.0146	T	C	intergenic	ANAPC5;RNF34	dist=21655;dist=24219	.	12	121375864	7.19e-05	0.002469	0.05429	0.9888	0.0146	T	C	0.06476	942	0.1108	334	0.03947	608	0.084	500	0.1262	206	0.05442	294	0.01802	222	0.01852	54	0.01786	168	0.09211	76	0.15	20
rs1172411	13	47659830	-0.7276	-0.5614	-0.4386	-2.42	-1.082	8.89e-05	0.01291	0.5088	0.002348	0.09924	A	G	intergenic	HTR2A;LINC00562	dist=761748;dist=270323	.	13	47659830	8.89e-05	0.01291	0.5088	0.002348	0.09924	G	A	0.2468	944	0.1766	334	0.2852	610	0.2729	502	0.2136	206	0.3142	296	0.2162	222	0.07407	54	0.2619	168	0.3421	76	0.3	20
rs1750929	13	47660210	-0.734	-0.568	-0.4386	-2.42	-1.082	7.83e-05	0.01192	0.5088	0.002348	0.09924	T	C	intergenic	HTR2A;LINC00562	dist=762128;dist=269943	.	13	47660210	7.83e-05	0.01192	0.5088	0.002348	0.09924	T	C	0.2473	942	0.1766	334	0.2862	608	0.274	500	0.2136	206	0.3163	294	0.2162	222	0.07407	54	0.2619	168	0.3421	76	0.3	20
rs7332630	13	51005573	-0.6749	-0.5643	0.3794	-1.177	-1.201	5.16e-05	0.006663	0.5524	0.01869	0.02372	G	C	ncRNA_intronic	GUCY1B2	.	.	13	51005573	5.16e-05	0.006663	0.5524	0.01869	0.02372	G	C	0.3083	944	0.2305	334	0.3508	610	0.3307	502	0.267	206	0.375	296	0.2252	222	0.1111	54	0.2619	168	0.4737	76	0.4	20
rs7334102	13	51005657	-0.6974	-0.5814	0.5074	-1.177	-1.201	3.32e-05	0.005341	0.452	0.01869	0.02372	C	T	ncRNA_intronic	GUCY1B2	.	.	13	51005657	3.32e-05	0.005341	0.452	0.01869	0.02372	C	T	0.3104	944	0.2305	334	0.3541	610	0.3327	502	0.267	206	0.3784	296	0.2252	222	0.1111	54	0.2619	168	0.4605	76	0.4	20
rs7996960	13	51006169	-0.6854	-0.5984	0.2871	-1.177	-1.197	4.6e-05	0.004529	0.6455	0.01869	0.02715	T	C	ncRNA_intronic	GUCY1B2	.	.	13	51006169	4.6e-05	0.004529	0.6455	0.01869	0.02715	T	C	0.3047	942	0.2275	334	0.347	608	0.3287	502	0.2621	206	0.375	296	0.2252	222	0.1111	54	0.2619	168	0.4865	74	0.4	20
rs913558	13	78306988	1.909	2.435	NA	1.74	NA	7.14e-05	0.02769	NA	0.006163	NA	A	G	ncRNA_intronic	OBI1-AS1	.	.	13	78306988	7.14e-05	0.02769	NA	0.006163	NA	A	G	0.02754	944	0.0479	334	0.01639	610	0.01394	502	0.02913	206	0.003378	296	0.07658	222	0.1667	54	0.04762	168	0.01316	76	0	20
rs17069564	13	78314074	2.06	2.577	1.499	1.74	NA	1.23e-05	0.01805	0.3807	0.006163	NA	C	A	ncRNA_intronic	OBI1-AS1	.	.	13	78314074	1.23e-05	0.01805	0.3807	0.006163	NA	C	A	0.02979	940	0.05389	334	0.0165	606	0.016	500	0.03398	206	0.003401	294	0.07658	222	0.1667	54	0.04762	168	0.02632	76	0.05	20
rs17069581	13	78326938	1.905	2.427	NA	1.74	NA	7.32e-05	0.02806	NA	0.006163	NA	C	A	ncRNA_intronic	OBI1-AS1	.	.	13	78326938	7.32e-05	0.02806	NA	0.006163	NA	C	A	0.0276	942	0.0479	334	0.01645	608	0.014	500	0.02913	206	0.003401	294	0.07658	222	0.1667	54	0.04762	168	0.01316	76	0	20
rs78518996	13	78327211	1.87	2.435	NA	1.74	NA	0.0001159	0.02769	NA	0.008183	NA	T	G	ncRNA_intronic	OBI1-AS1	.	.	13	78327211	0.0001159	0.02769	NA	0.008183	NA	T	G	0.02671	936	0.04545	330	0.0165	606	0.01394	502	0.02913	206	0.003378	296	0.07339	218	0.16	50	0.04762	168	0.01316	76	0	20
rs75317445	13	78364947	1.909	2.435	NA	1.74	NA	7.14e-05	0.02769	NA	0.006163	NA	G	A	ncRNA_intronic	OBI1-AS1	.	.	13	78364947	7.14e-05	0.02769	NA	0.006163	NA	G	A	0.02754	944	0.0479	334	0.01639	610	0.01394	502	0.02913	206	0.003378	296	0.07658	222	0.1667	54	0.04762	168	0.01316	76	0	20
rs17069694	13	78381798	1.905	2.427	NA	1.74	NA	7.32e-05	0.02806	NA	0.006163	NA	T	C	ncRNA_intronic	OBI1-AS1	.	.	13	78381798	7.32e-05	0.02806	NA	0.006163	NA	T	C	0.0276	942	0.0479	334	0.01645	608	0.014	500	0.02913	206	0.003401	294	0.07658	222	0.1667	54	0.04762	168	0.01316	76	0	20
rs2135214	13	91697765	0.9263	1.163	-0.1206	0.5765	2.323	6.04e-05	0.004543	0.9145	0.08907	0.005001	G	A	intronic	GPC5	.	.	13	91697765	6.04e-05	0.004543	0.9145	0.08907	0.005001	G	A	0.1146	942	0.1497	334	0.09539	608	0.06574	502	0.1019	206	0.04054	296	0.2568	222	0.3519	54	0.2262	168	0.09211	76	0.1	20
rs58070624	13	91698689	0.9262	1.159	-0.1206	0.5765	2.338	6.05e-05	0.004652	0.9145	0.08907	0.004746	C	T	intronic	GPC5	.	.	13	91698689	6.05e-05	0.004652	0.9145	0.08907	0.004746	C	T	0.1146	942	0.1497	334	0.09539	608	0.066	500	0.1019	206	0.04082	294	0.2568	222	0.3519	54	0.2262	168	0.09211	76	0.1	20
rs72632631	13	91703640	0.9506	1.241	-0.1206	0.5765	2.338	4.25e-05	0.003118	0.9145	0.08907	0.004746	G	A	intronic	GPC5	.	.	13	91703640	4.25e-05	0.003118	0.9145	0.08907	0.004746	G	A	0.1136	942	0.1497	334	0.09375	608	0.064	500	0.1019	206	0.03741	294	0.2568	222	0.3519	54	0.2262	168	0.09211	76	0.1	20
C13_91704254	13	91704254	0.9262	1.159	-0.1206	0.5765	2.338	6.05e-05	0.004652	0.9145	0.08907	0.004746	T	TG	intronic	GPC5	.	.	13	91704254	6.05e-05	0.004652	0.9145	0.08907	0.004746	T	TG	0.1146	942	0.1497	334	0.09539	608	0.066	500	0.1019	206	0.04082	294	0.2568	222	0.3519	54	0.2262	168	0.09211	76	0.1	20
rs7334451	13	102598836	0.2836	0.1341	-1.162	1.859	0.02897	0.05159	0.4773	0.1592	5.57e-05	0.9409	G	C	intronic	TPP2	.	.	13	102598836	0.05159	0.4773	0.1592	5.57e-05	0.9409	C	G	0.4406	942	0.491	334	0.4128	608	0.442	500	0.466	206	0.4252	294	0.3784	222	0.3889	54	0.3036	168	0.2895	76	0.15	20
rs3783231	13	102600260	0.3074	0.137	-1.162	1.867	-0.101	0.0359	0.4702	0.1592	4.68e-05	0.804	G	A	intronic	TPP2	.	.	13	102600260	0.0359	0.4702	0.1592	4.68e-05	0.804	A	G	0.4391	936	0.494	332	0.4089	604	0.4458	498	0.4706	204	0.4286	294	0.3739	222	0.3889	54	0.2976	168	0.2895	76	0.15	20
C13_M11973	13	102603875	0.2875	0.1341	-1.162	1.867	0.02897	0.04824	0.4773	0.1592	4.68e-05	0.9409	T	TAGG	intronic	TPP2	.	rs10665854	13	102603875	0.04824	0.4773	0.1592	4.68e-05	0.9409	T	TAGG	0.4395	942	0.491	334	0.4112	608	0.442	500	0.466	206	0.4252	294	0.3739	222	0.3889	54	0.2976	168	0.2895	76	0.15	20
rs4772494	13	102603946	0.2976	0.134	-1.162	1.867	-0.06078	0.04142	0.4779	0.1592	4.68e-05	0.8801	G	A	intronic	TPP2	.	.	13	102603946	0.04142	0.4779	0.1592	4.68e-05	0.8801	A	G	0.4384	942	0.491	334	0.4095	608	0.4422	502	0.466	206	0.4257	296	0.3739	222	0.3889	54	0.2976	168	0.2895	76	0.15	20
rs9300750	13	102611511	0.2905	0.1382	-1.162	1.867	0.02897	0.04564	0.4624	0.1592	4.68e-05	0.9409	A	G	intronic	TPP2	.	.	13	102611511	0.04564	0.4624	0.1592	4.68e-05	0.9409	G	A	0.4416	942	0.494	334	0.4128	608	0.446	500	0.4709	206	0.4286	294	0.3739	222	0.3889	54	0.2976	168	0.2895	76	0.15	20
rs7998217	13	102614644	0.2822	0.0961	-0.6818	1.867	0.02897	0.05397	0.614	0.3803	4.68e-05	0.9409	A	G	intronic	TPP2	.	.	13	102614644	0.05397	0.614	0.3803	4.68e-05	0.9409	G	A	0.4437	942	0.494	334	0.4161	608	0.448	500	0.466	206	0.4354	294	0.3739	222	0.3889	54	0.2976	168	0.3026	76	0.2	20
rs4360805	13	102629099	0.2738	0.07143	-0.6818	1.99	0.02897	0.06281	0.7083	0.3803	3.91e-05	0.9409	A	T	intronic	TPP2	.	.	13	102629099	0.06281	0.7083	0.3803	3.91e-05	0.9409	T	A	0.4479	940	0.497	334	0.4208	606	0.456	500	0.4709	206	0.4456	294	0.3727	220	0.3889	54	0.2952	166	0.3026	76	0.2	20
rs652199	13	102642065	0.274	0.06757	-0.6818	1.999	0.02897	0.06254	0.7235	0.3803	3.53e-05	0.9409	A	G	intronic	TPP2	.	.	13	102642065	0.06254	0.7235	0.3803	3.53e-05	0.9409	G	A	0.4448	942	0.494	334	0.4178	608	0.452	500	0.466	206	0.4422	294	0.3694	222	0.3889	54	0.2917	168	0.3026	76	0.2	20
rs617381	13	102646882	0.274	0.06757	-0.6818	1.999	0.02897	0.06254	0.7235	0.3803	3.53e-05	0.9409	A	G	intronic	TPP2	.	.	13	102646882	0.06254	0.7235	0.3803	3.53e-05	0.9409	G	A	0.4448	942	0.494	334	0.4178	608	0.452	500	0.466	206	0.4422	294	0.3694	222	0.3889	54	0.2917	168	0.3026	76	0.2	20
rs677251	13	102649674	0.2975	0.08246	-0.6818	1.999	-0.09687	0.04392	0.6655	0.3803	3.53e-05	0.8094	C	G	intronic	TPP2	.	.	13	102649674	0.04392	0.6655	0.3803	3.53e-05	0.8094	G	C	0.4449	944	0.497	334	0.4164	610	0.4502	502	0.466	206	0.4392	296	0.3694	222	0.3889	54	0.2917	168	0.3026	76	0.2	20
rs677248	13	102654972	0.276	0.07123	-0.6818	1.999	0.02897	0.0606	0.709	0.3803	3.53e-05	0.9409	G	A	intronic	TPP2	.	.	13	102654972	0.0606	0.709	0.3803	3.53e-05	0.9409	A	G	0.4447	940	0.494	334	0.4175	606	0.4518	498	0.466	206	0.4418	292	0.3694	222	0.3889	54	0.2917	168	0.3026	76	0.2	20
rs672129	13	102655133	0.2815	0.08238	-0.6818	1.999	0.02897	0.05544	0.6655	0.3803	3.53e-05	0.9409	A	G	intronic	TPP2	.	.	13	102655133	0.05544	0.6655	0.3803	3.53e-05	0.9409	G	A	0.4437	942	0.494	334	0.4161	608	0.45	500	0.466	206	0.4388	294	0.3694	222	0.3889	54	0.2917	168	0.3026	76	0.2	20
rs658332	13	102655937	0.289	0.07019	-0.6818	1.999	-0.08561	0.04961	0.7133	0.3803	3.53e-05	0.8278	C	T	intronic	TPP2	.	.	13	102655937	0.04961	0.7133	0.3803	3.53e-05	0.8278	T	C	0.4456	938	0.497	334	0.4172	604	0.4516	496	0.466	206	0.4414	290	0.3694	222	0.3889	54	0.2917	168	0.3026	76	0.2	20
rs694941	13	102661058	0.2722	0.0684	-0.6818	1.999	0.02897	0.0628	0.7177	0.3803	3.53e-05	0.9409	C	T	intronic	TPP2	.	.	13	102661058	0.0628	0.7177	0.3803	3.53e-05	0.9409	T	C	0.4448	942	0.494	334	0.4178	608	0.452	500	0.466	206	0.4422	294	0.3694	222	0.3889	54	0.2917	168	0.3026	76	0.2	20
rs2442707	13	102661211	0.2815	0.08238	-0.6818	1.999	0.02897	0.05544	0.6655	0.3803	3.53e-05	0.9409	T	G	intronic	TPP2	.	.	13	102661211	0.05544	0.6655	0.3803	3.53e-05	0.9409	G	T	0.4437	942	0.494	334	0.4161	608	0.45	500	0.466	206	0.4388	294	0.3694	222	0.3889	54	0.2917	168	0.3026	76	0.2	20
rs676266	13	102674916	0.296	0.1055	-0.6818	1.999	0.02897	0.04465	0.5815	0.3803	3.53e-05	0.9409	A	C	intronic	TPP2	.	.	13	102674916	0.04465	0.5815	0.3803	3.53e-05	0.9409	C	A	0.4449	944	0.497	334	0.4164	610	0.4522	502	0.4709	206	0.4392	296	0.3694	222	0.3889	54	0.2917	168	0.3026	76	0.2	20
rs678994	13	102675547	0.2815	0.08238	-0.6818	1.999	0.02897	0.05544	0.6655	0.3803	3.53e-05	0.9409	G	A	intronic	TPP2	.	.	13	102675547	0.05544	0.6655	0.3803	3.53e-05	0.9409	A	G	0.4437	942	0.494	334	0.4161	608	0.45	500	0.466	206	0.4388	294	0.3694	222	0.3889	54	0.2917	168	0.3026	76	0.2	20
rs622582	13	102682315	0.2814	0.08246	-0.6818	1.999	0.02897	0.05562	0.6655	0.3803	3.53e-05	0.9409	A	G	intergenic	TPP2;METTL21C	dist=2357;dist=3432	.	13	102682315	0.05562	0.6655	0.3803	3.53e-05	0.9409	G	A	0.4439	944	0.494	334	0.4164	610	0.4502	502	0.466	206	0.4392	296	0.3694	222	0.3889	54	0.2917	168	0.3026	76	0.2	20
rs687450	13	102683546	0.2746	0.08238	-0.6818	1.837	0.02897	0.0609	0.6655	0.3803	5.08e-05	0.9409	A	C	intergenic	TPP2;METTL21C	dist=3588;dist=2201	.	13	102683546	0.0609	0.6655	0.3803	5.08e-05	0.9409	C	A	0.4448	942	0.494	334	0.4178	608	0.45	500	0.466	206	0.4388	294	0.3739	222	0.3889	54	0.2976	168	0.3026	76	0.2	20
rs331596	13	110553720	-0.7972	-0.6945	-1.221	-0.924	-1.13	1.32e-05	0.002985	0.1493	0.0294	0.03703	C	T	intronic	RAB20	.	.	13	110553720	1.32e-05	0.002985	0.1493	0.0294	0.03703	C	T	0.2739	942	0.1886	334	0.3207	608	0.266	500	0.2039	206	0.3095	294	0.3063	222	0.1852	54	0.3452	168	0.3421	76	0.15	20
rs3759604	14	49635373	-0.931	-0.853	-0.6472	-1.044	-2.253	0.0001302	0.002186	0.602	0.1597	0.04731	C	G	upstream	DNAAF2	dist=129	.	14	49635373	0.0001302	0.002186	0.602	0.1597	0.04731	C	G	0.1412	942	0.09281	334	0.1678	608	0.18	500	0.1214	206	0.2211	294	0.1126	222	0.05556	54	0.131	168	0.09211	76	0.05	20
rs8011488	14	63483844	-1.063	-1.177	-1.748	-0.7485	-0.6237	2.11e-05	0.0004461	0.1565	0.1283	0.4931	A	G	intronic	PPP2R5E	.	.	14	63483844	2.11e-05	0.0004461	0.1565	0.1283	0.4931	A	G	0.1557	944	0.08982	334	0.1918	610	0.1434	502	0.08252	206	0.1858	296	0.1982	222	0.1296	54	0.2202	168	0.25	76	0.15	20
rs10148960	14	63485151	-1.108	-1.231	-1.868	-0.7601	-0.712	1.67e-05	0.0003999	0.1473	0.1227	0.4388	C	G	intronic	PPP2R5E	.	.	14	63485151	1.67e-05	0.0003999	0.1473	0.1227	0.4388	C	G	0.1514	938	0.08683	334	0.1871	604	0.1375	502	0.07767	206	0.1791	296	0.2	220	0.1296	54	0.2229	166	0.2237	76	0.15	20
rs8022113	14	63485540	-1.007	-1.203	-1.531	-0.5545	-0.6237	6.75e-05	0.0005629	0.213	0.2312	0.4931	A	G	intronic	PPP2R5E	.	.	14	63485540	6.75e-05	0.0005629	0.213	0.2312	0.4931	A	G	0.1489	940	0.08982	334	0.1815	606	0.134	500	0.07767	206	0.1735	294	0.2045	220	0.1481	54	0.2229	166	0.2105	76	0.15	20
rs61336431	14	63487906	-1.005	-1.218	-1.551	-0.4767	-0.6237	7.51e-05	0.0004686	0.2252	0.3037	0.4931	T	TA	intronic	PPP2R5E	.	rs397937660	14	63487906	7.51e-05	0.0004686	0.2252	0.3037	0.4931	TA	T	0.1489	940	0.09036	332	0.1809	608	0.136	500	0.07767	206	0.1769	294	0.2045	220	0.1538	52	0.2202	168	0.1974	76	0.15	20
rs2064955	14	63488429	-1.016	-1.218	-1.551	-0.5429	-0.6237	6.11e-05	0.0004686	0.2252	0.2409	0.4931	G	C	intronic	PPP2R5E	.	.	14	63488429	6.11e-05	0.0004686	0.2252	0.2409	0.4931	G	C	0.1486	942	0.08982	334	0.1809	608	0.136	500	0.07767	206	0.1769	294	0.2027	222	0.1481	54	0.2202	168	0.1974	76	0.15	20
rs140733727	14	63489393	-0.9935	-1.196	-1.551	-0.5158	-0.6237	8.92e-05	0.0005941	0.2252	0.2647	0.4931	T	TTTG	intronic	PPP2R5E	.	rs370592744	14	63489393	8.92e-05	0.0005941	0.2252	0.2647	0.4931	T	TTTG	0.1468	940	0.08982	334	0.1782	606	0.1345	498	0.07767	206	0.1747	292	0.1982	222	0.1481	54	0.2143	168	0.1974	76	0.15	20
C14_M5613	14	63489789	-1.016	-1.218	-1.551	-0.5429	-0.6237	6.11e-05	0.0004686	0.2252	0.2409	0.4931	G	GAATTT	intronic	PPP2R5E	.	rs10624396	14	63489789	6.11e-05	0.0004686	0.2252	0.2409	0.4931	GAATTT	G	0.1486	942	0.08982	334	0.1809	608	0.136	500	0.07767	206	0.1769	294	0.2027	222	0.1481	54	0.2202	168	0.1974	76	0.15	20
rs4902230	14	63489849	-1.021	-1.221	-1.551	-0.5429	-0.6237	5.71e-05	0.0004485	0.2252	0.2409	0.4931	A	T	intronic	PPP2R5E	.	.	14	63489849	5.71e-05	0.0004485	0.2252	0.2409	0.4931	A	T	0.1489	940	0.08982	334	0.1815	606	0.1365	498	0.07767	206	0.1781	292	0.2027	222	0.1481	54	0.2202	168	0.1974	76	0.15	20
rs28639496	14	63490134	-1.017	-1.214	-1.551	-0.5509	-0.6237	6.06e-05	0.000493	0.2252	0.2336	0.4931	A	T	intronic	PPP2R5E	.	.	14	63490134	6.06e-05	0.000493	0.2252	0.2336	0.4931	A	T	0.1486	942	0.08982	334	0.1809	608	0.1355	502	0.07767	206	0.1757	296	0.2045	220	0.1481	54	0.2229	166	0.1974	76	0.15	20
rs76974007	14	63490689	-1.014	-1.221	-1.551	-0.5251	-0.6237	6.37e-05	0.0004485	0.2252	0.2563	0.4931	T	C	intronic	PPP2R5E	.	.	14	63490689	6.37e-05	0.0004485	0.2252	0.2563	0.4931	T	C	0.1482	938	0.08982	334	0.1805	604	0.1365	498	0.07767	206	0.1781	292	0.2	220	0.1481	54	0.2169	166	0.1974	76	0.15	20
rs8012085	14	63490935	-0.9686	-1.204	-1.303	-0.5429	-0.6237	9.93e-05	0.0005432	0.2281	0.2409	0.4931	G	T	intronic	PPP2R5E	.	.	14	63490935	9.93e-05	0.0005432	0.2281	0.2409	0.4931	G	T	0.1521	940	0.09337	332	0.1842	608	0.1365	498	0.07843	204	0.1769	294	0.2027	222	0.1481	54	0.2202	168	0.2368	76	0.2	20
rs11850808	14	63491607	-1.051	-1.202	-1.551	-0.7166	-0.6237	4.63e-05	0.0005597	0.2252	0.1435	0.4931	A	G	intronic	PPP2R5E	.	.	14	63491607	4.63e-05	0.0005597	0.2252	0.1435	0.4931	A	G	0.1454	942	0.08434	332	0.1787	610	0.134	500	0.07353	204	0.1757	296	0.1937	222	0.1296	54	0.2143	168	0.1974	76	0.15	20
rs4902231	14	63491874	-1.045	-1.199	-1.551	-0.691	-0.6237	5.09e-05	0.0005615	0.2252	0.1584	0.4931	A	C	intronic	PPP2R5E	.	.	14	63491874	5.09e-05	0.0005615	0.2252	0.1584	0.4931	A	C	0.1441	944	0.08383	334	0.177	610	0.1335	502	0.07282	206	0.1757	296	0.1892	222	0.1296	54	0.2083	168	0.1974	76	0.15	20
rs72692593	14	86185364	0.9953	1.463	-0.708	0.443	-0.2188	0.0002205	1.22e-05	0.5789	0.6648	0.7839	T	C	intergenic	LINC02328;LINC01148	dist=55587;dist=720414	.	14	86185364	0.0002205	1.22e-05	0.5789	0.6648	0.7839	T	C	0.08068	942	0.1347	334	0.05099	608	0.1135	502	0.1942	206	0.05743	296	0.02703	222	0.03704	54	0.02381	168	0.09211	76	0.05	20
rs11159748	14	86192401	0.9746	1.359	-0.04481	0.443	-0.1812	0.0003134	3.9e-05	0.972	0.6648	0.8197	G	C	intergenic	LINC02328;LINC01148	dist=62624;dist=713377	.	14	86192401	0.0003134	3.9e-05	0.972	0.6648	0.8197	G	C	0.07856	942	0.1317	334	0.04934	608	0.114	500	0.1893	206	0.06122	294	0.02703	222	0.03704	54	0.02381	168	0.06579	76	0.05	20
rs1954113	14	86195892	0.3507	1.151	-0.4606	-0.2794	-0.2593	0.04127	2.55e-05	0.5354	0.4161	0.5346	G	T	intergenic	LINC02328;LINC01148	dist=66115;dist=709886	.	14	86195892	0.04127	2.55e-05	0.5354	0.4161	0.5346	G	T	0.2771	942	0.2934	334	0.2681	608	0.168	500	0.2573	206	0.1054	294	0.4324	222	0.3704	54	0.4524	168	0.2105	76	0.15	20
rs9323785	14	86197144	0.3567	1.19	-0.4606	-0.2794	-0.314	0.03805	1.49e-05	0.5354	0.4161	0.4591	C	A	intergenic	LINC02328;LINC01148	dist=67367;dist=708634	.	14	86197144	0.03805	1.49e-05	0.5354	0.4161	0.4591	C	A	0.2803	942	0.2994	334	0.2697	608	0.1713	502	0.2621	206	0.1081	296	0.4324	222	0.3704	54	0.4524	168	0.2105	76	0.15	20
rs79669992	14	86198417	0.3296	1.196	-0.4606	-0.3417	-0.3969	0.05868	1.92e-05	0.5354	0.3263	0.3614	G	A	intergenic	LINC02328;LINC01148	dist=68640;dist=707361	.	14	86198417	0.05868	1.92e-05	0.5354	0.3263	0.3614	G	A	0.2762	934	0.2892	332	0.2691	602	0.1673	496	0.2573	206	0.1034	290	0.4364	220	0.3654	52	0.4583	168	0.2105	76	0.15	20
rs141327257	14	86198812	0.3586	1.211	-0.4606	-0.2794	-0.341	0.03917	1.5e-05	0.5354	0.4161	0.4254	G	T	intergenic	LINC02328;LINC01148	dist=69035;dist=706966	.	14	86198812	0.03917	1.5e-05	0.5354	0.4161	0.4254	G	T	0.2739	942	0.2904	334	0.2648	608	0.166	500	0.2573	206	0.102	294	0.4324	222	0.3704	54	0.4524	168	0.2105	76	0.15	20
rs116967085	14	86200330	0.945	1.3	-0.04481	0.449	-0.1425	0.0004908	8.47e-05	0.972	0.661	0.8575	T	G	intergenic	LINC02328;LINC01148	dist=70553;dist=705448	.	14	86200330	0.0004908	8.47e-05	0.972	0.661	0.8575	T	G	0.07783	938	0.1295	332	0.0495	606	0.112	500	0.1845	206	0.06122	294	0.02727	220	0.03704	54	0.0241	166	0.06579	76	0.05	20
rs137898267	14	86200371	0.3142	1.158	-0.4606	-0.4596	-0.2389	0.07315	3.6e-05	0.5354	0.1979	0.5842	A	G	intergenic	LINC02328;LINC01148	dist=70594;dist=705407	.	14	86200371	0.07315	3.6e-05	0.5354	0.1979	0.5842	A	G	0.2709	934	0.2831	332	0.2641	602	0.1653	496	0.2524	206	0.1034	290	0.4227	220	0.3333	54	0.4518	166	0.2105	76	0.15	20
rs1959752	14	86203190	0.3275	1.158	-0.4606	-0.3811	-0.314	0.05749	2.24e-05	0.5354	0.2775	0.4591	A	G	intergenic	LINC02328;LINC01148	dist=73413;dist=702588	.	14	86203190	0.05749	2.24e-05	0.5354	0.2775	0.4591	A	G	0.2771	942	0.2934	334	0.2681	608	0.1673	502	0.2573	206	0.1047	296	0.4279	222	0.3519	54	0.4524	168	0.2105	76	0.15	20
rs9635281	14	86206637	0.3476	1.158	-0.4606	-0.2794	-0.314	0.04333	2.24e-05	0.5354	0.4161	0.4591	G	A	intergenic	LINC02328;LINC01148	dist=76860;dist=699141	.	14	86206637	0.04333	2.24e-05	0.5354	0.4161	0.4591	G	A	0.2771	942	0.2934	334	0.2681	608	0.1673	502	0.2573	206	0.1047	296	0.4324	222	0.3704	54	0.4524	168	0.2105	76	0.15	20
rs12147257	14	86211665	1.012	1.382	0.3025	0.443	-0.2188	0.0002636	4.24e-05	0.8264	0.6648	0.7839	C	T	intergenic	LINC02328;LINC01148	dist=81888;dist=694113	.	14	86211665	0.0002636	4.24e-05	0.8264	0.6648	0.7839	C	T	0.07537	942	0.1287	334	0.04605	608	0.1096	502	0.1845	206	0.05743	296	0.02703	222	0.03704	54	0.02381	168	0.05263	76	0.05	20
rs28448768	14	86212152	0.7034	1.416	-1.27	-0.3734	0.2514	0.001401	4.42e-06	0.3074	0.5641	0.7127	A	G	intergenic	LINC02328;LINC01148	dist=82375;dist=693626	.	14	86212152	0.001401	4.42e-06	0.3074	0.5641	0.7127	A	G	0.1149	940	0.1647	334	0.08746	606	0.134	500	0.2233	206	0.07143	294	0.09459	222	0.07407	54	0.1012	168	0.1447	76	0.05	20
rs72694617	14	86212730	0.9397	1.3	-0.04481	0.443	-0.1812	0.000531	8.47e-05	0.972	0.6648	0.8197	G	A	intergenic	LINC02328;LINC01148	dist=82953;dist=693048	.	14	86212730	0.000531	8.47e-05	0.972	0.6648	0.8197	G	A	0.07749	942	0.1287	334	0.04934	608	0.112	500	0.1845	206	0.06122	294	0.02703	222	0.03704	54	0.02381	168	0.06579	76	0.05	20
C14_M8329	14	86216294	0.7104	1.422	-1.27	-0.3734	0.2897	0.001246	3.99e-06	0.3074	0.5641	0.6702	C	CAG	intergenic	LINC02328;LINC01148	dist=86517;dist=689484	.	14	86216294	0.001246	3.99e-06	0.3074	0.5641	0.6702	C	CAG	0.1144	944	0.1647	334	0.08689	610	0.1335	502	0.2233	206	0.07095	296	0.09459	222	0.07407	54	0.1012	168	0.1447	76	0.05	20
rs10131663	14	86226579	0.7082	1.174	-1.088	-0.2768	0.7567	0.0009844	3.51e-05	0.3369	0.6961	0.2928	C	T	intergenic	LINC02328;LINC01148	dist=96802;dist=679199	.	14	86226579	0.0009844	3.51e-05	0.3369	0.6961	0.2928	C	T	0.1237	938	0.1818	330	0.09211	608	0.1586	498	0.2451	204	0.09864	294	0.07273	220	0.05769	52	0.07738	168	0.1447	76	0.05	20
rs111428098	14	86228547	0.8684	1.009	0.1496	0.6565	0.5274	6.96e-05	0.0005389	0.8833	0.1371	0.4893	A	AT	intergenic	LINC02328;LINC01148	dist=98770;dist=677231	rs111428098	14	86228547	6.96e-05	0.0005389	0.8833	0.1371	0.4893	AT	A	0.1298	940	0.1946	334	0.09406	606	0.138	500	0.2087	206	0.08844	294	0.1667	222	0.2593	54	0.1369	168	0.1053	76	0.15	20
C14_M8331	14	86228662	0.7057	1.214	-1.088	-0.3832	0.7165	0.001018	2.44e-05	0.3369	0.5826	0.3198	A	AC	intergenic	LINC02328;LINC01148	dist=98885;dist=677116	rs762879165	14	86228662	0.001018	2.44e-05	0.3369	0.5826	0.3198	A	AC	0.1223	940	0.1796	334	0.09076	606	0.1554	502	0.2427	206	0.09459	296	0.07273	220	0.05556	54	0.07831	166	0.1447	76	0.05	20
rs8017716	14	94865978	0.2354	0.99	-0.9057	-0.7268	-0.5639	0.1752	7.02e-05	0.4998	0.09477	0.2094	A	G	intergenic	GSC-DT;DICER1	dist=92371;dist=220250	.	14	94865978	0.1752	7.02e-05	0.4998	0.09477	0.2094	A	G	0.2691	944	0.2814	334	0.2623	610	0.2251	502	0.301	206	0.1723	296	0.3378	222	0.2407	54	0.369	168	0.1184	76	0.1	20
rs71425514	14	106327710	0.6371	1.107	1.379	0.2939	-0.3941	0.002572	9.04e-05	0.1612	0.552	0.5541	G	T	intergenic	LINC00226;LINC00221	dist=39338;dist=154729	.	14	106327710	0.002572	9.04e-05	0.1612	0.552	0.5541	G	T	0.178	944	0.2186	334	0.1557	610	0.1813	502	0.2524	206	0.1318	296	0.1712	222	0.1852	54	0.1667	168	0.2105	76	0.25	20
C15_17079640	15	17079640	0.9171	1.561	0.4852	-0.4072	0.9166	0.0001401	1.17e-05	0.6481	0.4686	0.1489	T	A	intergenic	NONE;NONE	dist=NONE;dist=NONE	.	15	17079640	0.0001401	1.17e-05	0.6481	0.4686	0.1489	T	A	0.1104	942	0.1557	334	0.08553	608	0.1	500	0.165	206	0.05442	294	0.1351	222	0.1296	54	0.1369	168	0.1053	76	0.15	20
C15_17079648	15	17079648	1.04	1.594	0.4852	-0.2394	1.421	3.08e-05	1.22e-05	0.6481	0.6739	0.05043	G	A	intergenic	NONE;NONE	dist=NONE;dist=NONE	.	15	17079648	3.08e-05	1.22e-05	0.6481	0.6739	0.05043	G	A	0.09979	942	0.1497	334	0.07237	608	0.096	500	0.1602	206	0.05102	294	0.1216	222	0.1296	54	0.119	168	0.1053	76	0.15	20
rs116335579	15	24398440	-0.9684	-0.9912	0.0421	-1.386	-1.399	5.52e-05	0.00114	0.9685	0.01992	0.0558	G	A	intergenic	PWRN2;PWRN3	dist=228492;dist=42687	.	15	24398440	5.52e-05	0.00114	0.9685	0.01992	0.0558	G	A	0.167	934	0.1084	332	0.1993	602	0.1787	498	0.1214	206	0.2192	292	0.1881	218	0.09615	52	0.2169	166	0.09459	74	0.1	20
rs7162812	15	27988588	0.3464	0.02802	1.738	-2.22	0.3721	0.02482	0.8903	0.06784	4.33e-05	0.3465	A	G	intronic	OCA2	.	.	15	27988588	0.02482	0.8903	0.06784	4.33e-05	0.3465	G	A	0.4331	942	0.4431	334	0.4276	608	0.292	500	0.2864	206	0.2959	294	0.4099	222	0.1481	54	0.494	168	0.2632	76	0.4	20
rs10775262	15	27988759	0.3034	-0.3792	-1.368	-2.243	0.2902	0.1035	0.2194	0.2002	5.79e-05	0.5035	C	T	intronic	OCA2	.	.	15	27988759	0.1035	0.2194	0.2002	5.79e-05	0.5035	C	T	0.2484	942	0.2485	334	0.2484	608	0.118	500	0.09709	206	0.1327	294	0.455	222	0.2037	54	0.4643	168	0.1842	76	0.1	20
rs10775263	15	27988767	0.2958	-0.3928	-1.368	-2.243	0.2902	0.1121	0.2034	0.2002	5.79e-05	0.5035	T	C	intronic	OCA2	.	.	15	27988767	0.1121	0.2034	0.2002	5.79e-05	0.5035	T	C	0.2489	944	0.2485	334	0.2492	610	0.1195	502	0.09709	206	0.1351	296	0.455	222	0.2037	54	0.4643	168	0.1842	76	0.1	20
rs730502	15	27989264	0.3	-0.3792	-1.368	-2.226	0.2902	0.1072	0.2194	0.2002	6.46e-05	0.5035	T	G	intronic	OCA2	.	.	15	27989264	0.1072	0.2194	0.2002	6.46e-05	0.5035	T	G	0.2479	940	0.2485	334	0.2475	606	0.118	500	0.09709	206	0.1327	294	0.4545	220	0.2037	54	0.4639	166	0.1842	76	0.1	20
C15_M728	15	27989317	0.3424	0.02802	1.158	-2.22	0.3721	0.02565	0.8903	0.1611	4.33e-05	0.3465	A	AT	intronic	OCA2	.	rs3214781	15	27989317	0.02565	0.8903	0.1611	4.33e-05	0.3465	A	AT	0.4289	942	0.4401	334	0.4227	608	0.292	500	0.2864	206	0.2959	294	0.4099	222	0.1481	54	0.494	168	0.3158	76	0.45	20
rs7173874	15	31522264	-0.6556	-0.6141	-1.817	-0.8521	-0.3626	6.71e-05	0.003052	0.136	0.05147	0.3849	C	G	intronic	OTUD7A	.	.	15	31522264	6.71e-05	0.003052	0.136	0.05147	0.3849	C	G	0.3263	944	0.2575	334	0.3639	610	0.3665	502	0.2961	206	0.4155	296	0.2973	222	0.1852	54	0.3333	168	0.2105	76	0.1	20
rs7165737	15	32684900	0.4483	0.8215	-0.3405	0.3354	-0.3758	0.003981	9.98e-05	0.6327	0.4036	0.3934	G	A	intronic	ARHGAP11A-SCG5;SCG5	.	.	15	32684900	0.003981	9.98e-05	0.6327	0.4036	0.3934	A	G	0.3777	940	0.4281	334	0.3498	606	0.366	500	0.4515	206	0.3061	294	0.3227	220	0.3519	54	0.3133	166	0.4474	76	0.35	20
rs4774403	15	61505300	0.2955	0.153	-3.163	2.426	0.2181	0.06043	0.4291	0.01891	4.47e-05	0.6222	A	G	intergenic	RORA;LINC02349	dist=275998;dist=224618	.	15	61505300	0.06043	0.4291	0.01891	4.47e-05	0.6222	G	A	0.4459	942	0.488	334	0.4095	608	0.444	500	0.4515	206	0.4388	294	0.1937	222	0.3889	54	0.131	168	0.3816	76	0.2	20
rs62007229	15	61506568	0.4157	0.1126	1.119	2.455	-0.9086	0.0431	0.6524	0.2352	7.43e-05	0.206	C	G	intergenic	RORA;LINC02349	dist=277266;dist=223350	.	15	61506568	0.0431	0.6524	0.2352	7.43e-05	0.206	C	G	0.1253	942	0.1557	334	0.1086	608	0.152	500	0.1553	206	0.1497	294	0.09009	222	0.2407	54	0.04167	168	0.1053	76	0.15	20
rs62007230	15	61506576	0.41	0.1042	1.119	2.455	-0.9086	0.04619	0.6771	0.2352	7.43e-05	0.206	G	A	intergenic	RORA;LINC02349	dist=277274;dist=223342	.	15	61506576	0.04619	0.6771	0.2352	7.43e-05	0.206	G	A	0.1255	940	0.1557	334	0.1089	606	0.1526	498	0.1553	206	0.1507	292	0.09009	222	0.2407	54	0.04167	168	0.1053	76	0.15	20
rs57754953	15	61507130	0.3761	0.03138	1.41	2.455	-1.129	0.07309	0.9024	0.1381	7.43e-05	0.1513	A	G	intergenic	RORA;LINC02349	dist=277828;dist=222788	.	15	61507130	0.07309	0.9024	0.1381	7.43e-05	0.1513	A	G	0.12	942	0.1467	334	0.1053	608	0.148	500	0.1456	206	0.1497	294	0.09009	222	0.2407	54	0.04167	168	0.09211	76	0.15	20
rs35351548	15	61508992	0.5195	0.2559	1.052	2.565	-0.8516	0.01192	0.316	0.2559	3.18e-05	0.2387	G	A	intergenic	RORA;LINC02349	dist=279690;dist=220926	.	15	61508992	0.01192	0.316	0.2559	3.18e-05	0.2387	G	A	0.1295	942	0.1647	334	0.1102	608	0.148	500	0.1602	206	0.1395	294	0.09459	222	0.2593	54	0.04167	168	0.1711	76	0.2	20
rs4984301	15	63558889	-0.8106	-0.4903	-0.965	1.472	-1.418	4.88e-05	0.06768	0.2485	0.004946	0.004054	A	T	intronic	USP3	.	.	15	63558889	4.88e-05	0.06768	0.2485	0.004946	0.004054	T	A	0.3705	942	0.2695	334	0.426	608	0.19	500	0.1602	206	0.2109	294	0.2342	222	0.3333	54	0.2024	168	0.25	76	0.15	20
C16_M2981	16	27329869	1.272	1.309	0.6056	1.884	1.116	4.87e-05	0.001185	0.722	0.1144	0.08	T	TG	intronic	IL4R	.	.	16	27329869	4.87e-05	0.001185	0.722	0.1144	0.08	T	TG	0.06064	940	0.1078	334	0.03465	606	0.06827	498	0.1117	206	0.03767	292	0.01802	222	0.03704	54	0.0119	168	0.02632	76	0.05	20
C16_32091658	16	32091658	0.586	1.092	0.7849	-0.5647	0.1288	0.004194	8.92e-05	0.3932	0.2545	0.8199	A	G	intergenic	ZNF267;LOC102723753	dist=174301;dist=60454	.	16	32091658	0.004194	8.92e-05	0.3932	0.2545	0.8199	A	G	0.2267	944	0.2665	334	0.2049	610	0.2311	502	0.301	206	0.1824	296	0.2387	222	0.2037	54	0.25	168	0.2368	76	0.3	20
C16_33040372	16	33040372	0.4908	0.1199	1.583	-0.1259	3.523	0.01815	0.6553	0.09377	0.8017	5.6e-05	G	T	intergenic	SLC6A10P;TP53TG3	dist=155230;dist=153890	.	16	33040372	0.01815	0.6553	0.09377	0.8017	5.6e-05	G	T	0.2638	940	0.2952	332	0.2467	608	0.253	498	0.2598	204	0.2483	294	0.3108	222	0.3148	54	0.3095	168	0.2368	76	0.35	20
rs77227556	16	33734588	-1.062	-1.062	-1.538	-0.8565	-1.646	2.93e-06	0.0004038	0.1008	0.0944	0.02243	C	A	intergenic	LOC390705;ENPP7P13	dist=238353;dist=34789	.	16	33734588	2.93e-06	0.0004038	0.1008	0.0944	0.02243	C	A	0.371	938	0.3054	334	0.4073	604	0.358	500	0.2961	206	0.4014	294	0.3818	220	0.3148	54	0.4036	166	0.3553	76	0.25	20
rs74716198	16	33739449	1.031	1.178	2.325	0.2745	1.804	5.7e-06	8.68e-05	0.03928	0.6023	0.009421	G	A	intergenic	LOC390705;ENPP7P13	dist=243214;dist=29928	.	16	33739449	5.7e-06	8.68e-05	0.03928	0.6023	0.009421	G	A	0.133	940	0.1958	332	0.09868	608	0.144	500	0.2087	206	0.09864	294	0.1351	222	0.1481	54	0.131	168	0.09211	76	0.2	20
rs76495562	16	33739450	1.063	1.246	2.325	0.2745	1.804	2.96e-06	3.73e-05	0.03928	0.6023	0.009421	C	T	intergenic	LOC390705;ENPP7P13	dist=243215;dist=29927	.	16	33739450	2.96e-06	3.73e-05	0.03928	0.6023	0.009421	C	T	0.134	940	0.1988	332	0.09868	608	0.146	500	0.2136	206	0.09864	294	0.1351	222	0.1481	54	0.131	168	0.09211	76	0.2	20
rs113497350	16	34123648	-1.016	-1.221	-0.5499	-0.8435	-0.7982	7.97e-05	0.0003477	0.5674	0.187	0.2386	A	G	intergenic	ENPP7P13;MIR9901	dist=339373;dist=39930	.	16	34123648	7.97e-05	0.0003477	0.5674	0.187	0.2386	A	G	0.1386	938	0.08383	334	0.1689	604	0.138	500	0.07767	206	0.1803	294	0.1364	220	0.09259	54	0.1506	166	0.1579	76	0.1	20
C16_34123653	16	34123653	-0.9888	-1.156	-0.5499	-0.8435	-0.7982	0.0001015	0.0005311	0.5674	0.187	0.2386	A	G	intergenic	ENPP7P13;MIR9901	dist=339378;dist=39925	.	16	34123653	0.0001015	0.0005311	0.5674	0.187	0.2386	A	G	0.1407	938	0.08683	334	0.1705	604	0.142	500	0.08252	206	0.1837	294	0.1364	220	0.09259	54	0.1506	166	0.1579	76	0.1	20
rs75195374	16	46432159	0.8523	0.9431	0.6965	0.7121	1.126	4.13e-05	0.0006635	0.451	0.144	0.05276	C	A	intergenic	NONE;ANKRD26P1	dist=NONE;dist=37178	.	16	46432159	4.13e-05	0.0006635	0.451	0.144	0.05276	C	A	0.1917	944	0.2485	334	0.1607	610	0.1912	502	0.2524	206	0.1486	296	0.2027	222	0.2407	54	0.1905	168	0.1579	76	0.2	20
rs8061482	16	49639773	0.7202	1.011	0.3084	0.7931	-0.7045	0.0004398	5.37e-05	0.7547	0.3142	0.3161	G	C	intronic	ZNF423	.	.	16	49639773	0.0004398	5.37e-05	0.7547	0.3142	0.3161	G	C	0.1345	944	0.1976	334	0.1	610	0.1833	502	0.2767	206	0.1182	296	0.06306	222	0.07407	54	0.05952	168	0.09211	76	0.1	20
rs117221326	16	49640608	0.6822	1.005	0.6875	-0.124	-0.4195	0.000919	6.45e-05	0.6068	0.8889	0.5101	T	C	intronic	ZNF423	.	.	16	49640608	0.000919	6.45e-05	0.6068	0.8889	0.5101	T	C	0.1261	928	0.1867	332	0.09228	596	0.1768	492	0.267	206	0.1119	286	0.04955	222	0.03704	54	0.05357	168	0.04054	74	0.05	20
rs137858503	16	67627670	1.479	NA	NA	1.583	1.236	5.95e-05	NA	NA	0.00167	0.08072	T	C	intronic	CTCF	.	.	16	67627670	5.95e-05	NA	NA	0.00167	0.08072	T	C	0.05567	934	0.07784	334	0.04333	600	0.002024	494	0.004854	206	0	288	0.1591	220	0.2778	54	0.1205	166	0.02632	76	0.1	20
rs1025528	16	82456941	0.6179	0.6876	1.18	0.7164	0.6333	4.73e-05	0.0008069	0.07041	0.04643	0.1524	A	G	intergenic	MPHOSPH6;CDH13	dist=286717;dist=170028	.	16	82456941	4.73e-05	0.0008069	0.07041	0.04643	0.1524	G	A	0.3673	942	0.4431	334	0.3257	608	0.352	500	0.432	206	0.2959	294	0.3874	222	0.5	54	0.3512	168	0.5	76	0.35	20
rs7194177	16	82491925	-0.9569	-0.8575	-1.928	-1.251	-1.026	1.92e-05	0.001233	0.0517	0.269	0.09306	T	C	intergenic	MPHOSPH6;CDH13	dist=321701;dist=135044	.	16	82491925	1.92e-05	0.001233	0.0517	0.269	0.09306	T	C	0.1748	944	0.1198	334	0.2049	610	0.2072	502	0.1456	206	0.25	296	0.04955	222	0.01852	54	0.05952	168	0.3289	76	0.1	20
rs3197188	16	84178502	-0.4827	-1.077	0.1269	0.5575	-0.08818	0.006871	8.45e-05	0.9074	0.1274	0.8355	T	C	UTR3	TAF1C	NM_001243157.1:c.*439A>G;NM_001243159.2:c.*439A>G;NM_001243156.2:c.*439A>G;NM_005679.4:c.*439A>G;NM_001243160.2:c.*439A>G;NM_001243158.2:c.*439A>G;NM_139353.3:c.*439A>G	.	16	84178502	0.006871	8.45e-05	0.9074	0.1274	0.8355	T	C	0.2282	942	0.1826	334	0.2533	608	0.206	500	0.1214	206	0.2653	294	0.2748	222	0.3333	54	0.256	168	0.1184	76	0.1	20
rs77459275	17	21340409	-0.8111	-1.271	-0.5366	-0.2302	0.007735	0.000273	3.1e-05	0.5448	0.6586	0.9888	T	C	intergenic	MAP2K3;KCNJ12	dist=25170;dist=35948	.	17	21340409	0.000273	3.1e-05	0.5448	0.6586	0.9888	T	C	0.189	942	0.1407	334	0.2155	608	0.194	500	0.1214	206	0.2449	294	0.1532	222	0.1481	54	0.1548	168	0.2237	76	0.15	20
rs74574267	17	21340426	-0.8432	-1.081	-0.6316	-0.3421	-1.094	9.61e-05	0.0002086	0.4948	0.4999	0.06669	T	A	intergenic	MAP2K3;KCNJ12	dist=25187;dist=35931	.	17	21340426	9.61e-05	0.0002086	0.4948	0.4999	0.06669	T	A	0.2176	942	0.1677	334	0.2451	608	0.21	500	0.1505	206	0.2517	294	0.1982	222	0.1852	54	0.2024	168	0.2237	76	0.15	20
rs75317727	17	21340446	-1.094	-1.232	-0.7773	-0.7136	-1.647	2.69e-07	1.22e-05	0.3893	0.1446	0.00985	T	C	intergenic	MAP2K3;KCNJ12	dist=25207;dist=35911	.	17	21340446	2.69e-07	1.22e-05	0.3893	0.1446	0.00985	T	C	0.2686	942	0.1976	334	0.3076	608	0.272	500	0.1942	206	0.3265	294	0.2432	222	0.2037	54	0.256	168	0.2368	76	0.15	20
rs113336767	17	21340450	-1.11	-1.232	-0.7773	-0.7136	-1.733	1.88e-07	1.22e-05	0.3893	0.1446	0.006992	T	C	intergenic	MAP2K3;KCNJ12	dist=25211;dist=35907	.	17	21340450	1.88e-07	1.22e-05	0.3893	0.1446	0.006992	T	C	0.2696	942	0.1976	334	0.3092	608	0.272	500	0.1942	206	0.3265	294	0.2432	222	0.2037	54	0.256	168	0.2368	76	0.15	20
C17_21693262	17	21693262	0.8819	0.473	3.72	1.712	1.806	4.87e-05	0.08962	0.02068	0.003017	0.0117	G	T	intronic	KCNJ18	.	.	17	21693262	4.87e-05	0.08962	0.02068	0.003017	0.0117	G	T	0.2898	942	0.3473	334	0.2582	608	0.298	500	0.3301	206	0.2755	294	0.2793	222	0.3889	54	0.244	168	0.2632	76	0.4	20
C17_21693265	17	21693265	0.8393	0.4852	4.38	1.573	1.255	5.99e-05	0.07289	0.01259	0.003208	0.04709	T	G	intronic	KCNJ18	.	.	17	21693265	5.99e-05	0.07289	0.01259	0.003208	0.04709	T	G	0.259	942	0.3174	334	0.227	608	0.266	500	0.301	206	0.2415	294	0.2432	222	0.3519	54	0.2083	168	0.2368	76	0.4	20
C17_21693562	17	21693562	0.8968	1.196	0.319	-0.1609	2.241	1.98e-05	2.26e-05	0.7083	0.7396	0.0007116	G	C	intronic	KCNJ18	.	.	17	21693562	1.98e-05	2.26e-05	0.7083	0.7396	0.0007116	G	C	0.2452	942	0.3024	334	0.2138	608	0.23	500	0.301	206	0.1803	294	0.2748	222	0.2593	54	0.2798	168	0.3026	76	0.35	20
C17_21702902	17	21702902	-0.07811	-0.1997	-0.4277	-2.586	-0.8762	0.6535	0.3912	0.507	8.16e-05	0.05514	A	G	exonic	KCNJ18	.	.	17	21702902	0.6535	0.3912	0.507	8.16e-05	0.05514	A	G	0.4519	936	0.4398	332	0.4586	604	0.4312	494	0.4069	204	0.4483	290	0.4459	222	0.2963	54	0.494	168	0.2763	76	0.3	20
C17_21715363	17	21715363	-0.8027	-1.191	-0.4179	-0.3909	-0.4383	0.0001764	4.03e-05	0.6169	0.4314	0.4244	A	G	intergenic	KCNJ18;UBBP4	dist=10751;dist=487632	.	17	21715363	0.0001764	4.03e-05	0.6169	0.4314	0.4244	A	G	0.2234	940	0.1766	334	0.2492	606	0.2289	498	0.165	206	0.274	292	0.2072	222	0.1852	54	0.2143	168	0.2368	76	0.2	20
C17_21721889	17	21721889	-0.976	-1.255	-0.05899	-0.8352	-0.5065	3.65e-06	1.14e-05	0.9445	0.08638	0.3554	T	G	intergenic	KCNJ18;UBBP4	dist=17277;dist=481106	.	17	21721889	3.65e-06	1.14e-05	0.9445	0.08638	0.3554	T	G	0.2548	942	0.1886	334	0.2911	608	0.238	500	0.1602	206	0.2925	294	0.2658	222	0.2037	54	0.2857	168	0.2368	76	0.2	20
C17_26727658	17	26727658	0.8377	0.8802	0.1843	1.205	1.097	9.28e-05	0.002361	0.8427	0.01478	0.06602	A	G	intergenic	NONE;LOC105371703	dist=NONE;dist=344731	.	17	26727658	9.28e-05	0.002361	0.8427	0.01478	0.06602	A	G	0.1677	942	0.2216	334	0.1382	608	0.152	500	0.2039	206	0.1156	294	0.1757	222	0.2778	54	0.1429	168	0.2632	76	0.25	20
C17_26727659	17	26727659	0.8377	0.8802	0.1843	1.205	1.097	9.28e-05	0.002361	0.8427	0.01478	0.06602	A	G	intergenic	NONE;LOC105371703	dist=NONE;dist=344730	.	17	26727659	9.28e-05	0.002361	0.8427	0.01478	0.06602	A	G	0.1677	942	0.2216	334	0.1382	608	0.152	500	0.2039	206	0.1156	294	0.1757	222	0.2778	54	0.1429	168	0.2632	76	0.25	20
C17_26734181	17	26734181	0.8732	0.8563	2.004	1.19	0.3816	2.6e-05	0.001688	0.04608	0.01511	0.5206	G	T	intergenic	NONE;LOC105371703	dist=NONE;dist=338208	.	17	26734181	2.6e-05	0.001688	0.04608	0.01511	0.5206	G	T	0.215	944	0.2754	334	0.182	610	0.2351	502	0.2864	206	0.1993	296	0.2072	222	0.2963	54	0.1786	168	0.2105	76	0.35	20
C17_26750006	17	26750006	0.8346	0.7512	2.753	0.7561	1.384	7.77e-05	0.006414	0.04821	0.1472	0.024	C	T	intergenic	NONE;LOC105371703	dist=NONE;dist=322383	.	17	26750006	7.77e-05	0.006414	0.04821	0.1472	0.024	C	T	0.1974	932	0.2575	334	0.1639	598	0.2189	498	0.267	206	0.1849	292	0.133	218	0.1852	54	0.1159	164	0.2838	74	0.45	20
rs111592644	17	26949472	-1.077	-1.341	-0.9079	-0.319	-2.692	2.46e-06	1.49e-05	0.33	0.5321	0.004011	T	A	intergenic	NONE;LOC105371703	dist=NONE;dist=122917	.	17	26949472	2.46e-06	1.49e-05	0.33	0.5321	0.004011	T	A	0.3726	942	0.3114	334	0.4062	608	0.3566	502	0.2864	206	0.4054	296	0.3694	222	0.3519	54	0.375	168	0.3816	76	0.35	20
rs79327622	17	26949490	-1.073	-1.136	-1.4	-0.6027	-2.798	4.93e-06	0.0003369	0.1563	0.2471	0.002201	A	T	intergenic	NONE;LOC105371703	dist=NONE;dist=122899	.	17	26949490	4.93e-06	0.0003369	0.1563	0.2471	0.002201	A	T	0.3854	942	0.3293	334	0.4161	608	0.3725	502	0.3204	206	0.4088	296	0.3829	222	0.3519	54	0.3929	168	0.4079	76	0.35	20
rs75774085	17	26949499	-1.044	-1.178	-1.119	-0.4844	-2.798	7.02e-06	0.0001904	0.2416	0.3471	0.002201	T	C	intergenic	NONE;LOC105371703	dist=NONE;dist=122890	.	17	26949499	7.02e-06	0.0001904	0.2416	0.3471	0.002201	T	C	0.3811	942	0.3263	334	0.4112	608	0.3705	502	0.3155	206	0.4088	296	0.3739	222	0.3519	54	0.381	168	0.3947	76	0.35	20
rs10445393	17	26953049	0.7844	1.144	0.5446	0.2369	0.5037	0.0001642	6e-05	0.5721	0.6135	0.3542	A	T	intergenic	NONE;LOC105371703	dist=NONE;dist=119340	.	17	26953049	0.0001642	6e-05	0.5721	0.6135	0.3542	A	T	0.2301	930	0.2866	328	0.1993	602	0.2409	494	0.315	200	0.1905	294	0.2227	220	0.2407	54	0.2169	166	0.1711	76	0.2	20
rs76768869	17	26960797	-1.042	-1.113	-0.8019	-0.4912	-2.1	9.01e-06	0.0003707	0.4097	0.3664	0.009253	T	C	intergenic	NONE;LOC105371703	dist=NONE;dist=111592	.	17	26960797	9.01e-06	0.0003707	0.4097	0.3664	0.009253	T	C	0.3856	944	0.3293	334	0.4164	610	0.3785	502	0.3252	206	0.4155	296	0.3919	222	0.3519	54	0.4048	168	0.3684	76	0.3	20
rs74572602	17	26960810	-1.046	-1.095	-0.7097	-0.8668	-1.66	5.01e-06	0.0001979	0.485	0.1081	0.04018	C	T	intergenic	NONE;LOC105371703	dist=NONE;dist=111579	.	17	26960810	5.01e-06	0.0001979	0.485	0.1081	0.04018	C	T	0.3761	944	0.3144	334	0.4098	610	0.3546	502	0.2961	206	0.3953	296	0.3919	222	0.3333	54	0.4107	168	0.3816	76	0.3	20
C17_26961017	17	26961017	-0.9756	-0.8555	-1.111	-1.051	-1.547	7.89e-05	0.007245	0.2227	0.05909	0.08744	T	A	intergenic	NONE;LOC105371703	dist=NONE;dist=111372	.	17	26961017	7.89e-05	0.007245	0.2227	0.05909	0.08744	T	A	0.4034	942	0.3563	334	0.4293	608	0.39	500	0.3495	206	0.4184	294	0.4099	222	0.3519	54	0.4286	168	0.3816	76	0.3	20
rs62051864	17	26961112	-0.9635	-0.893	-2.036	-0.6632	-1.54	5.69e-06	0.001284	0.04641	0.1789	0.0124	G	A	intergenic	NONE;LOC105371703	dist=NONE;dist=111277	.	17	26961112	5.69e-06	0.001284	0.04641	0.1789	0.0124	G	A	0.3344	942	0.2695	334	0.3701	608	0.316	500	0.2621	206	0.3537	294	0.3423	222	0.2963	54	0.3571	168	0.3684	76	0.25	20
rs74361657	17	26962159	-0.8377	-0.8751	-0.2384	-0.7831	-1.787	9.16e-05	0.002081	0.7738	0.1054	0.01158	C	T	intergenic	NONE;LOC105371703	dist=NONE;dist=110230	.	17	26962159	9.16e-05	0.002081	0.7738	0.1054	0.01158	C	T	0.3273	944	0.2784	334	0.3541	610	0.3227	502	0.2718	206	0.3581	296	0.2973	222	0.2407	54	0.3155	168	0.3026	76	0.3	20
rs78688950	17	26975735	-0.8801	-1.21	-1.319	-0.4758	-0.4982	2.18e-05	2.07e-05	0.1787	0.3246	0.3577	A	G	intergenic	NONE;LOC105371703	dist=NONE;dist=96654	.	17	26975735	2.18e-05	2.07e-05	0.1787	0.3246	0.3577	A	G	0.2786	944	0.2186	334	0.3115	610	0.2729	502	0.199	206	0.3243	296	0.2973	222	0.2778	54	0.3036	168	0.25	76	0.15	20
rs78162233	17	26975740	-0.7752	-1.138	-0.319	-0.4157	-0.4639	0.0002417	7.16e-05	0.7458	0.4327	0.4087	T	C	intergenic	NONE;LOC105371703	dist=NONE;dist=96649	.	17	26975740	0.0002417	7.16e-05	0.7458	0.4327	0.4087	T	C	0.3347	944	0.2844	334	0.3623	610	0.3267	502	0.2621	206	0.3716	296	0.3649	222	0.3519	54	0.369	168	0.3421	76	0.3	20
rs74611684	17	33821846	1.741	1.447	2.764	1.391	NA	7.15e-05	0.005039	0.01307	0.4291	NA	T	C	intronic	ASIC2	.	.	17	33821846	7.15e-05	0.005039	0.01307	0.4291	NA	T	C	0.03178	944	0.06287	334	0.01475	610	0.03984	502	0.06796	206	0.02027	296	0.009009	222	0.01852	54	0.005952	168	0.09211	76	0.25	20
C17_33826928	17	33826928	1.709	1.279	3.651	1.391	NA	6.13e-05	0.009387	0.004726	0.4291	NA	T	TG	intronic	ASIC2	.	rs138717952	17	33826928	6.13e-05	0.009387	0.004726	0.4291	NA	TG	T	0.03503	942	0.06886	334	0.01645	608	0.044	500	0.07282	206	0.02381	294	0.009009	222	0.01852	54	0.005952	168	0.1053	76	0.3	20
rs74255119	17	52131306	1.065	1.323	1.441	0.06749	1.423	8.69e-07	2.97e-06	0.1399	0.8946	0.03039	G	C	intronic	CA10	.	.	17	52131306	8.69e-07	2.97e-06	0.1399	0.8946	0.03039	G	C	0.1582	942	0.2305	334	0.1184	608	0.1873	502	0.2718	206	0.1284	296	0.1486	222	0.1481	54	0.1488	168	0.09211	76	0.2	20
rs113614760	17	52131321	0.8938	1.039	1.441	0.3027	1.181	3.61e-05	0.0002039	0.1399	0.5661	0.06696	C	T	intronic	CA10	.	.	17	52131321	3.61e-05	0.0002039	0.1399	0.5661	0.06696	C	T	0.1564	940	0.2139	332	0.125	608	0.1813	502	0.2427	206	0.1385	296	0.15	220	0.1538	52	0.1488	168	0.09211	76	0.2	20
rs2958903	17	54788544	-0.7676	-0.9695	0.9401	-0.3798	-1.473	0.0001015	0.0006428	0.207	0.3397	0.02087	A	G	intergenic	KIF2B;TOM1L1	dist=963351;dist=112147	.	17	54788544	0.0001015	0.0006428	0.207	0.3397	0.02087	A	G	0.2389	942	0.1557	334	0.2845	608	0.178	500	0.1117	206	0.2245	294	0.3153	222	0.2593	54	0.3333	168	0.4868	76	0.45	20
C17_M12493	17	72438075	0.5147	0.8722	-0.736	0.1422	0.2673	0.00108	8.81e-05	0.2805	0.6746	0.5175	T	TA	ncRNA_intronic	LINC00673	.	rs398079152	17	72438075	0.00108	8.81e-05	0.2805	0.6746	0.5175	TA	T	0.4289	942	0.4671	334	0.4079	608	0.386	500	0.466	206	0.3299	294	0.4459	222	0.463	54	0.4405	168	0.4079	76	0.35	20
rs11150824	17	79951293	-0.6733	-0.9075	-0.5193	-0.4162	-0.2074	4.46e-05	3.59e-05	0.5457	0.2727	0.6407	T	A	intronic	TBC1D16	.	.	17	79951293	4.46e-05	3.59e-05	0.5457	0.2727	0.6407	T	A	0.345	942	0.2665	334	0.3882	608	0.352	500	0.2427	206	0.4286	294	0.2748	222	0.2222	54	0.2917	168	0.2763	76	0.2	20
rs8091064	18	5642215	-0.8649	-0.7439	-1.93	-1.362	-0.8477	5.43e-05	0.005377	0.1217	0.01862	0.2153	C	A	intergenic	EPB41L3;MIR3976HG	dist=11552;dist=106604	.	18	5642215	5.43e-05	0.005377	0.1217	0.01862	0.2153	C	A	0.1815	942	0.1168	334	0.2171	608	0.1912	502	0.1359	206	0.2297	296	0.2027	222	0.07407	54	0.244	168	0.1711	76	0.05	20
rs16948569	18	5643772	-0.8368	-0.7346	-1.752	-1.362	-0.8099	9.44e-05	0.005973	0.1705	0.01862	0.2344	A	G	intergenic	EPB41L3;MIR3976HG	dist=13109;dist=105047	.	18	5643772	9.44e-05	0.005973	0.1705	0.01862	0.2344	A	G	0.1783	942	0.1168	334	0.2122	608	0.19	500	0.1359	206	0.2279	294	0.2027	222	0.07407	54	0.244	168	0.1447	76	0.05	20
rs62085006	18	14183748	-0.8345	-0.884	0.2076	-0.7449	-1.229	8.76e-05	0.002161	0.8166	0.1215	0.03054	C	T	ncRNA_exonic	ANKRD20A5P	.	.	18	14183748	8.76e-05	0.002161	0.8166	0.1215	0.03054	C	T	0.3178	944	0.2695	334	0.3443	610	0.3426	502	0.2961	206	0.375	296	0.3108	222	0.2407	54	0.3333	168	0.2632	76	0.3	20
C18_15168836	18	15168836	0.8649	0.842	0.5708	0.4813	2.343	4.84e-05	0.002498	0.5201	0.373	0.001528	C	T	intergenic	LINC01443;LOC644669	dist=195080;dist=144720	.	18	15168836	4.84e-05	0.002498	0.5201	0.373	0.001528	C	T	0.1674	944	0.2275	334	0.1344	610	0.1873	502	0.2476	206	0.1453	296	0.1441	222	0.1667	54	0.1369	168	0.1447	76	0.2	20
C18_15344674	18	15344674	-0.8961	-0.9765	-1.532	-0.5773	-1.147	1.54e-05	0.0003829	0.1012	0.2451	0.04292	G	A	intergenic	LOC644669;NONE	dist=18755;dist=NONE	.	18	15344674	1.54e-05	0.0003829	0.1012	0.2451	0.04292	G	A	0.3021	940	0.238	332	0.3372	608	0.294	500	0.2282	206	0.3401	294	0.3136	220	0.2885	52	0.3214	168	0.2895	76	0.15	20
rs9675992	18	15395069	-0.869	-1.061	-4.443	-0.159	-0.4258	6.51e-05	0.0004169	0.03207	0.7319	0.4342	C	T	intergenic	LOC644669;NONE	dist=69150;dist=NONE	.	18	15395069	6.51e-05	0.0004169	0.03207	0.7319	0.4342	C	T	0.2097	944	0.1467	334	0.2443	610	0.1793	502	0.1117	206	0.2264	296	0.2477	222	0.2407	54	0.25	168	0.25	76	0.05	20
rs10502701	18	38587535	0.3537	-0.0127	-4.27	-0.4361	3.243	0.1118	0.9681	0.0885	0.4295	5.78e-05	C	A	intergenic	MIR4318;MIR924HG	dist=930320;dist=619389	.	18	38587535	0.1118	0.9681	0.0885	0.4295	5.78e-05	C	A	0.1218	944	0.1377	334	0.1131	610	0.1016	502	0.09709	206	0.1047	296	0.1216	222	0.09259	54	0.131	168	0.1316	76	0.05	20
rs16970683	18	38590710	0.401	-0.03362	-0.3237	-0.4361	2.941	0.06916	0.9157	0.7519	0.4295	6.79e-05	C	A	intergenic	MIR4318;MIR924HG	dist=933495;dist=616214	.	18	38590710	0.06916	0.9157	0.7519	0.4295	6.79e-05	C	A	0.1303	944	0.1467	334	0.1213	610	0.1036	502	0.09709	206	0.1081	296	0.1216	222	0.09259	54	0.131	168	0.2105	76	0.2	20
rs55669731	18	38591999	0.3773	-0.03362	-1.097	-0.4361	2.941	0.08764	0.9157	0.3347	0.4295	6.79e-05	G	GA	intergenic	MIR4318;MIR924HG	dist=934784;dist=614925	rs397934204	18	38591999	0.08764	0.9157	0.3347	0.4295	6.79e-05	GA	G	0.1282	944	0.1437	334	0.1197	610	0.1036	502	0.09709	206	0.1081	296	0.1216	222	0.09259	54	0.131	168	0.1842	76	0.15	20
rs12607324	18	38592554	0.4225	-0.0127	-0.8153	-0.4361	3.233	0.05677	0.9681	0.4617	0.4295	6.28e-05	C	A	intergenic	MIR4318;MIR924HG	dist=935339;dist=614370	.	18	38592554	0.05677	0.9681	0.4617	0.4295	6.28e-05	C	A	0.1242	942	0.1437	334	0.1135	608	0.1016	502	0.09709	206	0.1047	296	0.1216	222	0.09259	54	0.131	168	0.1579	76	0.15	20
rs12605324	18	38592688	0.3638	-0.05388	-1.097	-0.4361	2.922	0.09984	0.8655	0.3347	0.4295	7.41e-05	C	T	intergenic	MIR4318;MIR924HG	dist=935473;dist=614236	.	18	38592688	0.09984	0.8655	0.3347	0.4295	7.41e-05	C	T	0.129	938	0.1437	334	0.1209	604	0.1044	498	0.09709	206	0.1096	292	0.1216	222	0.09259	54	0.131	168	0.1842	76	0.15	20
rs74370754	18	38595944	0.4284	-0.0127	-0.8153	-0.4361	3.243	0.05328	0.9681	0.4617	0.4295	5.78e-05	C	T	intergenic	MIR4318;MIR924HG	dist=938729;dist=610980	.	18	38595944	0.05328	0.9681	0.4617	0.4295	5.78e-05	C	T	0.1229	944	0.1407	334	0.1131	610	0.1016	502	0.09709	206	0.1047	296	0.1216	222	0.09259	54	0.131	168	0.1579	76	0.15	20
rs16970711	18	38596346	0.3773	-0.03362	-1.097	-0.4361	2.941	0.08764	0.9157	0.3347	0.4295	6.79e-05	A	G	intergenic	MIR4318;MIR924HG	dist=939131;dist=610578	.	18	38596346	0.08764	0.9157	0.3347	0.4295	6.79e-05	A	G	0.1282	944	0.1437	334	0.1197	610	0.1036	502	0.09709	206	0.1081	296	0.1216	222	0.09259	54	0.131	168	0.1842	76	0.15	20
rs16970712	18	38596412	0.3773	-0.03362	-1.097	-0.4361	2.941	0.08764	0.9157	0.3347	0.4295	6.79e-05	C	T	intergenic	MIR4318;MIR924HG	dist=939197;dist=610512	.	18	38596412	0.08764	0.9157	0.3347	0.4295	6.79e-05	C	T	0.1271	944	0.1437	334	0.118	610	0.1036	502	0.09709	206	0.1081	296	0.1216	222	0.09259	54	0.131	168	0.1711	76	0.15	20
rs16970714	18	38596452	0.3869	-0.03362	-1.097	-0.3919	2.941	0.08018	0.9157	0.3347	0.4764	6.79e-05	G	A	intergenic	MIR4318;MIR924HG	dist=939237;dist=610472	.	18	38596452	0.08018	0.9157	0.3347	0.4764	6.79e-05	G	A	0.1263	942	0.1407	334	0.1184	608	0.1036	502	0.09709	206	0.1081	296	0.1182	220	0.09259	54	0.1265	166	0.1842	76	0.15	20
rs12606599	18	38598020	0.4248	-0.01973	-0.8153	-0.4361	3.243	0.05538	0.9505	0.4617	0.4295	5.78e-05	A	G	intergenic	MIR4318;MIR924HG	dist=940805;dist=608904	.	18	38598020	0.05538	0.9505	0.4617	0.4295	5.78e-05	A	G	0.1231	942	0.1407	334	0.1135	608	0.102	500	0.09709	206	0.1054	294	0.1216	222	0.09259	54	0.131	168	0.1579	76	0.15	20
rs12457667	18	38599709	0.3691	-0.04151	-0.5571	-0.4361	2.941	0.09168	0.896	0.5578	0.4295	6.79e-05	G	A	intergenic	MIR4318;MIR924HG	dist=942494;dist=607215	.	18	38599709	0.09168	0.896	0.5578	0.4295	6.79e-05	G	A	0.1316	942	0.1437	334	0.125	608	0.104	500	0.09709	206	0.1088	294	0.1216	222	0.09259	54	0.131	168	0.2368	76	0.2	20
rs28701674	18	38600722	0.3736	-0.04151	-1.097	-0.4361	2.941	0.09089	0.896	0.3347	0.4295	6.79e-05	G	A	intergenic	MIR4318;MIR924HG	dist=943507;dist=606202	.	18	38600722	0.09089	0.896	0.3347	0.4295	6.79e-05	G	A	0.1285	942	0.1437	334	0.1201	608	0.104	500	0.09709	206	0.1088	294	0.1216	222	0.09259	54	0.131	168	0.1842	76	0.15	20
rs55757844	18	38601155	0.4225	-0.0127	-0.8153	-0.4361	3.233	0.05677	0.9681	0.4617	0.4295	6.28e-05	T	A	intergenic	MIR4318;MIR924HG	dist=943940;dist=605769	.	18	38601155	0.05677	0.9681	0.4617	0.4295	6.28e-05	T	A	0.1242	942	0.1437	334	0.1135	608	0.1016	502	0.09709	206	0.1047	296	0.1216	222	0.09259	54	0.131	168	0.1579	76	0.15	20
rs59721391	18	38604955	0.4284	-0.0127	-0.8153	-0.4361	3.243	0.05328	0.9681	0.4617	0.4295	5.78e-05	A	C	intergenic	MIR4318;MIR924HG	dist=947740;dist=601969	.	18	38604955	0.05328	0.9681	0.4617	0.4295	5.78e-05	A	C	0.1231	942	0.1407	334	0.1135	608	0.1016	502	0.09709	206	0.1047	296	0.1216	222	0.09259	54	0.131	168	0.1622	74	0.15	20
rs28676863	18	38605003	0.3773	-0.03362	-1.097	-0.4361	2.941	0.08764	0.9157	0.3347	0.4295	6.79e-05	G	A	intergenic	MIR4318;MIR924HG	dist=947788;dist=601921	.	18	38605003	0.08764	0.9157	0.3347	0.4295	6.79e-05	G	A	0.1263	942	0.1407	334	0.1184	608	0.1036	502	0.09709	206	0.1081	296	0.1216	222	0.09259	54	0.131	168	0.1757	74	0.15	20
rs75538119	18	38605255	0.4222	-0.01973	-0.8153	-0.4441	3.243	0.05686	0.9505	0.4617	0.421	5.78e-05	G	A	intergenic	MIR4318;MIR924HG	dist=948040;dist=601669	.	18	38605255	0.05686	0.9505	0.4617	0.421	5.78e-05	G	A	0.1245	940	0.1437	334	0.1139	606	0.102	500	0.09709	206	0.1054	294	0.1227	220	0.09259	54	0.1325	166	0.1579	76	0.15	20
rs10853463	18	39385515	0.4196	2.09	-0.4773	-0.05166	-0.2388	0.03955	3.56e-05	0.6594	0.8875	0.5459	G	T	ncRNA_intronic	MIR924HG	.	.	18	39385515	0.03955	3.56e-05	0.6594	0.8875	0.5459	G	T	0.1642	938	0.1766	334	0.1573	604	0.06	500	0.1165	206	0.02041	294	0.3073	218	0.2963	54	0.311	164	0.1184	76	0.1	20
rs11082136	18	39385761	0.4169	2.09	-0.4773	-0.04687	-0.2388	0.04023	3.56e-05	0.6594	0.8969	0.5459	G	A	ncRNA_intronic	MIR924HG	.	.	18	39385761	0.04023	3.56e-05	0.6594	0.8969	0.5459	G	A	0.1645	942	0.1766	334	0.1579	608	0.06	500	0.1165	206	0.02041	294	0.3063	222	0.2963	54	0.3095	168	0.1184	76	0.1	20
rs8090625	18	39391933	0.3928	1.942	-0.4188	-0.0382	-0.2565	0.05159	5.7e-05	0.6489	0.9154	0.514	C	G	ncRNA_intronic	MIR924HG	.	.	18	39391933	0.05159	5.7e-05	0.6489	0.9154	0.514	C	G	0.1773	942	0.1826	334	0.1743	608	0.06175	502	0.1165	206	0.02365	296	0.3018	222	0.2963	54	0.3036	168	0.2632	76	0.2	20
rs8097454	18	39396176	0.3273	1.926	-0.7212	-0.2696	-0.1874	0.108	6.33e-05	0.4912	0.483	0.6259	C	T	ncRNA_intronic	MIR924HG	.	.	18	39396176	0.108	6.33e-05	0.4912	0.483	0.6259	C	T	0.1756	934	0.1758	330	0.1755	604	0.0625	496	0.1176	204	0.02397	292	0.2909	220	0.25	52	0.3036	168	0.2763	76	0.2	20
rs72913792	18	48827884	0.8415	1.115	0.6081	-0.5552	1.252	0.0002536	8.11e-05	0.3946	0.6321	0.2668	A	G	intronic	CTIF	.	.	18	48827884	0.0002536	8.11e-05	0.3946	0.6321	0.2668	A	G	0.1186	936	0.1747	332	0.08775	604	0.16	500	0.2379	206	0.1054	294	0.03241	216	0.01923	52	0.03659	164	0.2632	76	0.3	20
rs4939999	18	50647027	0.1191	-0.242	0.462	1.957	-0.1659	0.4794	0.2771	0.5494	7.68e-05	0.7158	T	C	intronic	MAPK4	.	.	18	50647027	0.4794	0.2771	0.5494	7.68e-05	0.7158	T	C	0.2325	942	0.2485	334	0.2237	608	0.258	500	0.233	206	0.2755	294	0.1892	222	0.3704	54	0.131	168	0.1974	76	0.25	20
rs79603723	18	54237887	1.226	1.031	3.558	-0.3302	2.473	0.0001224	0.007303	0.0111	0.7926	0.1563	G	A	intergenic	MBD2;POLI	dist=13218;dist=31592	.	18	54237887	0.0001224	0.007303	0.0111	0.7926	0.1563	G	A	0.05864	938	0.09581	334	0.03808	604	0.07028	498	0.1068	206	0.04452	292	0.01802	222	0.01852	54	0.01786	168	0.1711	76	0.35	20
C18_M7311	18	63030443	0.5945	0.5173	0.7021	-0.8137	-0.7004	0.000111	0.009153	0.3332	0.02927	0.1062	C	CCTAT	intergenic	PHLPP1;BCL2	dist=50010;dist=92903	rs145962725	18	63030443	0.000111	0.009153	0.3332	0.02927	0.1062	CCTAT	C	0.4926	942	0.4132	334	0.4638	608	0.4641	502	0.466	206	0.4155	296	0.4279	222	0.2963	54	0.4702	168	0.3289	76	0.4	20
rs34384935	19	1999192	-0.4004	-1.12	-0.6559	0.8148	-0.08423	0.009835	1.08e-06	0.3581	0.03023	0.8522	G	A	intronic	BTBD2	.	.	19	1999192	0.009835	1.08e-06	0.3581	0.03023	0.8522	G	A	0.4459	942	0.3922	334	0.4753	608	0.436	500	0.3058	206	0.4728	294	0.4189	222	0.4444	54	0.375	168	0.4342	76	0.35	20
rs62129511	19	1999195	-0.367	-1.048	-0.4541	0.8984	-0.03652	0.01831	4.03e-06	0.5354	0.02029	0.9337	T	C	intronic	BTBD2	.	.	19	1999195	0.01831	4.03e-06	0.5354	0.02029	0.9337	T	C	0.4374	942	0.3892	334	0.4638	608	0.428	500	0.3058	206	0.4864	294	0.4144	222	0.4444	54	0.369	168	0.4605	76	0.4	20
rs62129512	19	1999196	-0.4004	-1.12	-0.6559	0.8148	-0.08423	0.009835	1.08e-06	0.3581	0.03023	0.8522	G	C	intronic	BTBD2	.	.	19	1999196	0.009835	1.08e-06	0.3581	0.03023	0.8522	G	C	0.4459	942	0.3922	334	0.4753	608	0.436	500	0.3058	206	0.4728	294	0.4189	222	0.4444	54	0.375	168	0.4342	76	0.35	20
rs2967434	19	36516640	0.7012	0.6886	1.941	-0.5838	0.65	2.07e-05	0.002265	0.03139	0.1294	0.1006	G	A	intronic	ZNF260	.	.	19	36516640	2.07e-05	0.002265	0.03139	0.1294	0.1006	A	G	0.3708	944	0.4192	334	0.3443	610	0.255	502	0.3155	206	0.2128	296	0.3649	222	0.2778	54	0.3929	168	0.3026	76	0.5	20
rs745296	20	6065791	0.6451	0.5971	1.474	0.3876	1.401	2.66e-05	0.004246	0.06768	0.2852	0.002883	T	A	intergenic	LRRN4;FERMT1	dist=11731;dist=9054	.	20	6065791	2.66e-05	0.004246	0.06768	0.2852	0.002883	A	T	0.3747	942	0.4581	334	0.3289	608	0.408	500	0.4612	206	0.3707	294	0.2883	222	0.3333	54	0.2738	168	0.4342	76	0.4	20
rs1233770	20	15514914	0.4782	1.013	1.139	-0.1447	-0.3836	0.002663	2.84e-05	0.1311	0.6664	0.3627	A	G	intronic	MACROD2	.	.	20	15514914	0.002663	2.84e-05	0.1311	0.6664	0.3627	A	G	0.2945	944	0.3383	334	0.2705	610	0.245	502	0.335	206	0.1824	296	0.3423	222	0.3333	54	0.3452	168	0.4079	76	0.45	20
rs844828	20	23104366	0.6645	0.6867	-0.4365	0.9459	0.8494	9.38e-05	0.002476	0.4749	0.02553	0.07363	T	C	intergenic	CD93;LINC00656	dist=18042;dist=20703	.	20	23104366	9.38e-05	0.002476	0.4749	0.02553	0.07363	T	C	0.3121	942	0.3713	334	0.2796	608	0.29	500	0.3641	206	0.2381	294	0.2883	222	0.3889	54	0.256	168	0.4079	76	0.45	20
rs844829	20	23104402	0.6645	0.6867	-0.4365	0.9459	0.8494	9.38e-05	0.002476	0.4749	0.02553	0.07363	C	G	intergenic	CD93;LINC00656	dist=18078;dist=20667	.	20	23104402	9.38e-05	0.002476	0.4749	0.02553	0.07363	C	G	0.3121	942	0.3713	334	0.2796	608	0.29	500	0.3641	206	0.2381	294	0.2883	222	0.3889	54	0.256	168	0.4079	76	0.45	20
rs12373869	20	25899868	0.9427	0.957	1.462	0.6103	1.462	4.76e-05	0.001699	0.2562	0.239	0.01724	T	G	intergenic	LOC101926935;LINC01733	dist=45847;dist=55944	.	20	25899868	4.76e-05	0.001699	0.2562	0.239	0.01724	T	G	0.328	942	0.3832	334	0.2977	608	0.3307	502	0.3835	206	0.2939	296	0.3227	220	0.3704	54	0.3072	166	0.3947	76	0.45	20
rs6050991	20	25916469	-0.886	-0.8684	-0.2865	-0.9502	-1.004	2.12e-05	0.001729	0.7696	0.04783	0.07601	T	G	intergenic	LOC101926935;LINC01733	dist=62448;dist=39343	.	20	25916469	2.12e-05	0.001729	0.7696	0.04783	0.07601	T	G	0.3083	944	0.2485	334	0.341	610	0.3108	502	0.2524	206	0.3514	296	0.3018	222	0.2222	54	0.3274	168	0.3158	76	0.25	20
rs77072836	20	25916471	-0.8992	-0.9107	-0.2865	-0.8641	-1.004	1.6e-05	0.001032	0.7696	0.06826	0.07601	A	T	intergenic	LOC101926935;LINC01733	dist=62450;dist=39341	.	20	25916471	1.6e-05	0.001032	0.7696	0.06826	0.07601	A	T	0.3061	944	0.2455	334	0.3393	610	0.3088	502	0.2476	206	0.3514	296	0.2973	222	0.2222	54	0.3214	168	0.3158	76	0.25	20
rs76267272	20	25916494	-0.8291	-1.044	-0.2865	-0.2791	-0.8625	8.86e-05	0.0002798	0.7696	0.5662	0.1262	G	A	intergenic	LOC101926935;LINC01733	dist=62473;dist=39318	.	20	25916494	8.86e-05	0.0002798	0.7696	0.5662	0.1262	G	A	0.3326	944	0.2784	334	0.3623	610	0.3327	502	0.267	206	0.3784	296	0.3378	222	0.3148	54	0.3452	168	0.3158	76	0.25	20
C20_28593103	20	28593103	-0.7415	-1.126	-0.2818	-0.04911	-0.3106	0.0003884	5.62e-05	0.758	0.9196	0.5717	A	C	ncRNA_intronic	FRG1CP	.	.	20	28593103	0.0003884	5.62e-05	0.758	0.9196	0.5717	A	C	0.242	942	0.1886	334	0.2714	608	0.2371	502	0.1553	206	0.2939	296	0.2477	222	0.2593	54	0.244	168	0.2237	76	0.2	20
C20_28619663	20	28619663	-0.8282	-1.167	-0.7343	-0.2405	-0.9696	0.0001383	8.41e-05	0.4019	0.6274	0.1366	T	G	intergenic	FRG1CP;FRG1DP	dist=16998;dist=460727	.	20	28619663	0.0001383	8.41e-05	0.4019	0.6274	0.1366	T	G	0.3464	944	0.2994	334	0.3721	610	0.3466	502	0.2816	206	0.3919	296	0.3468	222	0.3333	54	0.3512	168	0.2763	76	0.25	20
C20_28637999	20	28637999	-0.8507	-0.985	-0.5454	-0.6329	-0.8958	4.16e-05	0.0003529	0.5285	0.1813	0.1139	G	T	intergenic	FRG1CP;FRG1DP	dist=35334;dist=442391	.	20	28637999	4.16e-05	0.0003529	0.5285	0.1813	0.1139	G	T	0.2909	942	0.2365	334	0.3207	608	0.284	500	0.2233	206	0.3265	294	0.2838	222	0.2407	54	0.2976	168	0.3158	76	0.25	20
C20_28904362	20	28904362	-1.098	-1.455	-1.863	-0.03666	-1.299	5.18e-06	1.62e-05	0.09457	0.9508	0.0647	T	A	intergenic	FRG1CP;FRG1DP	dist=301697;dist=176028	.	20	28904362	5.18e-06	1.62e-05	0.09457	0.9508	0.0647	T	A	0.3992	942	0.3413	334	0.4309	608	0.384	500	0.3204	206	0.4286	294	0.4054	222	0.3889	54	0.4107	168	0.4737	76	0.4	20
C20_28904367	20	28904367	-0.9553	-1.152	-1.679	-0.1263	-0.9085	2.11e-05	0.0001373	0.08417	0.8233	0.1658	G	A	intergenic	FRG1CP;FRG1DP	dist=301702;dist=176023	.	20	28904367	2.11e-05	0.0001373	0.08417	0.8233	0.1658	G	A	0.3718	944	0.3174	334	0.4016	610	0.3606	502	0.301	206	0.402	296	0.3919	222	0.3704	54	0.3988	168	0.3553	76	0.25	20
C20_28921934	20	28921934	-0.7394	-1.206	0.1139	0.1703	-0.7904	0.0004546	3.08e-05	0.9	0.7158	0.1596	C	T	intergenic	FRG1CP;FRG1DP	dist=319269;dist=158456	.	20	28921934	0.0004546	3.08e-05	0.9	0.7158	0.1596	C	T	0.2229	942	0.1707	334	0.2516	608	0.2151	502	0.1359	206	0.2703	296	0.2117	222	0.2407	54	0.2024	168	0.2432	74	0.2	20
C20_28921941	20	28921941	-0.7514	-1.164	-0.5943	0.1382	-0.8518	0.0003338	4.56e-05	0.5319	0.7684	0.134	T	G	intergenic	FRG1CP;FRG1DP	dist=319276;dist=158449	.	20	28921941	0.0003338	4.56e-05	0.5319	0.7684	0.134	T	G	0.2304	942	0.1766	334	0.2599	608	0.2231	502	0.1456	206	0.277	296	0.2252	222	0.2593	54	0.2143	168	0.2297	74	0.15	20
C20_29018268	20	29018268	-1.008	-1.009	-2.231	-0.7913	-1.379	2.07e-05	0.001581	0.03095	0.1481	0.04198	C	T	intergenic	FRG1CP;FRG1DP	dist=415603;dist=62122	.	20	29018268	2.07e-05	0.001581	0.03095	0.1481	0.04198	C	T	0.3854	942	0.3383	334	0.4112	608	0.386	500	0.3398	206	0.4184	294	0.3874	222	0.3519	54	0.3988	168	0.3553	76	0.25	20
C20_29059792	20	29059792	-0.9235	-1.108	NA	0.005585	-0.9427	1.71e-05	9.05e-05	NA	0.9905	0.09824	T	C	intergenic	FRG1CP;FRG1DP	dist=457127;dist=20598	.	20	29059792	1.71e-05	9.05e-05	NA	0.9905	0.09824	T	C	0.2282	942	0.1707	334	0.2599	608	0.234	500	0.1699	206	0.2789	294	0.2117	222	0.2037	54	0.2143	168	0.1447	76	0	20
C20_29060823	20	29060823	-0.7605	-1.104	0.7552	0.02458	-1.136	0.0002223	6.32e-05	0.4216	0.9601	0.05853	G	A	intergenic	FRG1CP;FRG1DP	dist=458158;dist=19567	.	20	29060823	0.0002223	6.32e-05	0.4216	0.9601	0.05853	G	A	0.276	942	0.2246	334	0.3043	608	0.274	500	0.199	206	0.3265	294	0.2748	222	0.2778	54	0.2738	168	0.25	76	0.25	20
C20_29073410	20	29073410	-0.9123	-1.093	0.6708	0.05577	-4.024	7.42e-05	0.0004174	0.5795	0.9156	0.0006319	G	A	intergenic	FRG1CP;FRG1DP	dist=470745;dist=6980	.	20	29073410	7.42e-05	0.0004174	0.5795	0.9156	0.0006319	G	A	0.3758	942	0.3263	334	0.403	608	0.372	500	0.3155	206	0.4116	294	0.3604	222	0.3704	54	0.3571	168	0.3816	76	0.4	20
C20_29079715	20	29079715	-1.118	-1.073	-1.815	-1.179	-1.679	1.23e-07	0.0001156	0.05516	0.01915	0.007449	T	C	upstream	FRG1DP	dist=675	.	20	29079715	1.23e-07	0.0001156	0.05516	0.01915	0.007449	T	C	0.3217	942	0.2455	334	0.3635	608	0.312	500	0.2427	206	0.3605	294	0.3288	222	0.2593	54	0.3512	168	0.3026	76	0.15	20
C20_29350675	20	29350675	0.9554	1.141	NA	-0.1681	0.9394	2.23e-05	0.0001549	NA	0.7728	0.1278	T	C	intergenic	FRG1DP;FRG2EP	dist=253843;dist=63400	.	20	29350675	2.23e-05	0.0001549	NA	0.7728	0.1278	T	C	0.1331	924	0.1909	330	0.101	594	0.1496	488	0.2129	202	0.1049	286	0.1045	220	0.09259	54	0.1084	166	0.1528	72	0.3	20
C20_29350678	20	29350678	0.958	1.131	NA	-0.1768	0.9394	2.26e-05	0.0001794	NA	0.7664	0.1278	C	T	intergenic	FRG1DP;FRG2EP	dist=253846;dist=63397	.	20	29350678	2.26e-05	0.0001794	NA	0.7664	0.1278	C	T	0.1337	920	0.1921	328	0.1014	592	0.1523	486	0.215	200	0.1084	286	0.1	220	0.09259	54	0.1024	166	0.1571	70	0.3	20
C20_29350681	20	29350681	0.9833	1.148	NA	-0.09922	1.115	1.54e-05	0.0001822	NA	0.8693	0.06828	T	C	intergenic	FRG1DP;FRG2EP	dist=253849;dist=63394	.	20	29350681	1.54e-05	0.0001822	NA	0.8693	0.06828	T	C	0.134	918	0.1921	328	0.1017	590	0.1488	484	0.21	200	0.1056	284	0.09545	220	0.09259	54	0.09639	166	0.1857	70	0.3	20
C20_29451100	20	29451100	-0.7761	-1.157	NA	-0.4316	-0.2533	0.0002632	7.21e-05	NA	0.3745	0.6654	G	A	ncRNA_intronic	LOC105379477	.	.	20	29451100	0.0002632	7.21e-05	NA	0.3745	0.6654	G	A	0.2555	908	0.2031	320	0.284	588	0.2417	480	0.1768	198	0.2872	282	0.2752	218	0.2308	52	0.2892	166	0.1714	70	0.15	20
C20_29508323	20	29508323	-1.473	-1.934	1.271	-1.653	-1.567	7.07e-06	0.0001448	0.3469	0.0124	0.2042	G	C	intergenic	FRG1EP;FAM242B	dist=10989;dist=40396	.	20	29508323	7.07e-06	0.0001448	0.3469	0.0124	0.2042	G	C	0.4459	942	0.4042	334	0.4688	608	0.444	500	0.3981	206	0.4762	294	0.4459	222	0.3704	54	0.4702	168	0.4079	76	0.45	20
C20_29509578	20	29509578	-0.7997	-0.7598	NA	-1.136	-0.7882	0.000113	0.004759	NA	0.02467	0.1534	A	T	intergenic	FRG1EP;FAM242B	dist=12244;dist=39141	.	20	29509578	0.000113	0.004759	NA	0.02467	0.1534	A	T	0.3297	928	0.2711	332	0.3624	596	0.3206	496	0.2696	204	0.3562	292	0.3636	220	0.2778	54	0.3916	166	0.3571	70	0.3	20
C20_29639462	20	29639462	-0.8989	-0.8802	-0.4566	-0.884	-1.104	5.06e-05	0.002557	0.643	0.09405	0.07162	C	A	intergenic	FAM242B;MIR4477A	dist=78987;dist=240922	.	20	29639462	5.06e-05	0.002557	0.643	0.09405	0.07162	C	A	0.3652	942	0.3084	334	0.3964	608	0.3566	502	0.3058	206	0.3919	296	0.3874	222	0.3333	54	0.4048	168	0.3684	76	0.3	20
C20_29639474	20	29639474	-0.9857	-1.008	-0.4566	-0.865	-1.236	1.11e-05	0.0006272	0.643	0.1007	0.05823	T	C	intergenic	FAM242B;MIR4477A	dist=78999;dist=240910	.	20	29639474	1.11e-05	0.0006272	0.643	0.1007	0.05823	T	C	0.3694	942	0.3084	334	0.403	608	0.3586	502	0.301	206	0.3986	296	0.3874	222	0.3333	54	0.4048	168	0.3684	76	0.3	20
C20_29639496	20	29639496	-1.031	-1.01	-0.2755	-0.9846	-1.55	7.24e-06	0.0008638	0.7798	0.06297	0.02362	A	G	intergenic	FAM242B;MIR4477A	dist=79021;dist=240888	.	20	29639496	7.24e-06	0.0008638	0.7798	0.06297	0.02362	A	G	0.3769	942	0.3174	334	0.4095	608	0.3685	502	0.3155	206	0.4054	296	0.3964	222	0.3333	54	0.4167	168	0.3553	76	0.3	20
C20_29669588	20	29669588	-0.8341	-1.078	-0.4955	-0.9191	0.0769	5e-05	9.98e-05	0.551	0.05532	0.8903	A	C	intergenic	FAM242B;MIR4477A	dist=109113;dist=210796	.	20	29669588	5e-05	9.98e-05	0.551	0.05532	0.8903	A	C	0.276	942	0.2126	334	0.3109	608	0.262	500	0.1893	206	0.3129	294	0.3108	222	0.2407	54	0.3333	168	0.25	76	0.2	20
C20_29674534	20	29674534	-1.039	-1.13	-0.8755	-0.3865	-1.871	7.83e-06	0.0003171	0.373	0.4436	0.004287	C	G	intergenic	FAM242B;MIR4477A	dist=114059;dist=205850	.	20	29674534	7.83e-06	0.0003171	0.373	0.4436	0.004287	C	G	0.1783	942	0.1078	334	0.2171	608	0.164	500	0.09709	206	0.2109	294	0.1847	222	0.1481	54	0.1964	168	0.1974	76	0.15	20
C20_29805388	20	29805388	-0.6859	-1.142	0.2618	-0.02051	-0.508	0.0009931	6.16e-05	0.7618	0.9655	0.3537	G	A	intergenic	FAM242B;MIR4477A	dist=244913;dist=74996	.	20	29805388	0.0009931	6.16e-05	0.7618	0.9655	0.3537	G	A	0.2325	942	0.1867	332	0.2574	610	0.228	500	0.1569	204	0.277	296	0.2297	222	0.2407	54	0.2262	168	0.2237	76	0.2	20
C20_29805393	20	29805393	-0.6859	-1.142	0.2618	-0.02051	-0.508	0.0009931	6.16e-05	0.7618	0.9655	0.3537	T	C	intergenic	FAM242B;MIR4477A	dist=244918;dist=74991	.	20	29805393	0.0009931	6.16e-05	0.7618	0.9655	0.3537	T	C	0.2325	942	0.1867	332	0.2574	610	0.228	500	0.1569	204	0.277	296	0.2297	222	0.2407	54	0.2262	168	0.2237	76	0.2	20
C20_29810566	20	29810566	1.069	1.377	0.8851	0.6628	0.8682	8.7e-05	0.0002446	0.4097	0.2608	0.2986	A	G	intergenic	FAM242B;MIR4477A	dist=250091;dist=69818	.	20	29810566	8.7e-05	0.0002446	0.4097	0.2608	0.2986	A	G	0.07733	944	0.1198	334	0.0541	610	0.08167	502	0.1359	206	0.04392	296	0.08108	222	0.1111	54	0.07143	168	0.07895	76	0.1	20
C20_29810587	20	29810587	1.204	1.422	1.558	0.7392	1.36	1.15e-05	0.0001313	0.1267	0.2184	0.1523	T	A	intergenic	FAM242B;MIR4477A	dist=250112;dist=69797	.	20	29810587	1.15e-05	0.0001313	0.1267	0.2184	0.1523	T	A	0.07783	938	0.1257	334	0.05132	604	0.08367	502	0.1408	206	0.04392	296	0.07727	220	0.1111	54	0.06627	166	0.09459	74	0.15	20
C20_29869454	20	29869454	0.5658	1.166	0.2721	-0.7531	0.5279	0.006206	4.42e-05	0.7587	0.1474	0.339	G	A	intergenic	FAM242B;MIR4477A	dist=308979;dist=10930	.	20	29869454	0.006206	4.42e-05	0.7587	0.1474	0.339	G	A	0.2028	942	0.2455	334	0.1793	608	0.19	500	0.2573	206	0.1429	294	0.2072	222	0.1481	54	0.2262	168	0.1447	76	0.2	20
C20_29879691	20	29879691	-1.095	-1.276	-0.3381	-0.2662	-1.613	2.3e-05	0.0001828	0.7329	0.6449	0.02954	G	T	upstream;downstream	MIR4477B;MIR4477A	dist=693;dist=693	.	20	29879691	2.3e-05	0.0001828	0.7329	0.6449	0.02954	G	T	0.1398	944	0.08084	334	0.1721	610	0.1434	502	0.07767	206	0.1892	296	0.1216	222	0.1111	54	0.125	168	0.1711	76	0.1	20
C20_29883298	20	29883298	-0.8829	-0.7851	0.193	-0.6684	-1.76	4.17e-05	0.005448	0.8262	0.1747	0.002788	C	A	intergenic	MIR4477A;LINC01597	dist=2835;dist=395608	.	20	29883298	4.17e-05	0.005448	0.8262	0.1747	0.002788	C	A	0.2309	940	0.1737	334	0.2624	606	0.204	500	0.1553	206	0.2381	294	0.2658	222	0.2037	54	0.2857	168	0.1711	76	0.2	20
rs6141209	20	30205483	-1.251	-1.443	-1.426	-1.718	-0.4426	1.01e-05	0.0002018	0.2781	0.03072	0.4763	T	A	intergenic	MIR4477A;LINC01597	dist=325020;dist=73423	.	20	30205483	1.01e-05	0.0002018	0.2781	0.03072	0.4763	T	A	0.1308	902	0.07233	318	0.1627	584	0.1309	466	0.07368	190	0.1703	276	0.1216	222	0.03704	54	0.1488	168	0.1351	74	0.05	20
rs113605857	20	30205491	-1.131	-1.221	-1.011	-1.753	-0.4426	1.86e-05	0.0004412	0.4162	0.0253	0.4763	G	A	intergenic	MIR4477A;LINC01597	dist=325028;dist=73415	.	20	30205491	1.86e-05	0.0004412	0.4162	0.0253	0.4763	G	A	0.141	908	0.08333	324	0.1729	584	0.1462	472	0.09184	196	0.1848	276	0.1351	222	0.03704	54	0.1667	168	0.1216	74	0.05	20
rs62197046	20	30379258	0.98	0.9094	1.815	1.017	1.312	1.39e-05	0.002314	0.07929	0.06187	0.03524	A	G	ncRNA_intronic	FRG1BP	.	.	20	30379258	1.39e-05	0.002314	0.07929	0.06187	0.03524	A	G	0.1295	942	0.1898	332	0.09672	610	0.142	500	0.1912	204	0.1081	296	0.1126	222	0.1667	54	0.09524	168	0.1053	76	0.25	20
rs73621466	20	30391786	-0.8834	-0.8554	-3.148	-0.6216	-0.692	2.81e-05	0.002001	0.01035	0.2024	0.2537	T	C	ncRNA_intronic	FRG1BP	.	.	20	30391786	2.81e-05	0.002001	0.01035	0.2024	0.2537	T	C	0.3231	944	0.2665	334	0.3541	610	0.3068	502	0.2573	206	0.3412	296	0.3378	222	0.2963	54	0.3512	168	0.2895	76	0.05	20
rs73605271	20	30397632	-1.132	-1.041	-2.225	-0.8547	-1.74	2.02e-06	0.000959	0.01962	0.1411	0.01294	T	C	ncRNA_intronic	FRG1BP	.	.	20	30397632	2.02e-06	0.000959	0.01962	0.1411	0.01294	T	C	0.3909	944	0.3293	334	0.4246	610	0.3845	502	0.3301	206	0.4223	296	0.4054	222	0.3704	54	0.4167	168	0.3684	76	0.2	20
C20_30491365	20	30491365	-1.039	-1.065	-1.704	-1.304	-0.821	8.76e-07	0.0001297	0.1268	0.01069	0.1493	T	C	intergenic	FRG1BP;DEFB115	dist=71523;dist=766299	.	20	30491365	8.76e-07	0.0001297	0.1268	0.01069	0.1493	T	C	0.2675	942	0.1886	334	0.3109	608	0.266	500	0.1893	206	0.3197	294	0.2748	222	0.1667	54	0.3095	168	0.2105	76	0.1	20
C20_30491371	20	30491371	-0.9917	-0.9878	-1.559	-1.115	-1.102	2.25e-06	0.0003502	0.1611	0.02312	0.05515	T	C	intergenic	FRG1BP;DEFB115	dist=71529;dist=766293	.	20	30491371	2.25e-06	0.0003502	0.1611	0.02312	0.05515	T	C	0.276	942	0.2006	334	0.3174	608	0.274	500	0.2039	206	0.3231	294	0.2973	222	0.2037	54	0.3274	168	0.1974	76	0.1	20
C20_30491376	20	30491376	-0.9583	-0.9583	-1.559	-1.202	-1.002	5.23e-06	0.0005218	0.1611	0.01537	0.09179	T	G	intergenic	FRG1BP;DEFB115	dist=71534;dist=766288	.	20	30491376	5.23e-06	0.0005218	0.1611	0.01537	0.09179	T	G	0.2792	942	0.2066	334	0.3191	608	0.272	500	0.2039	206	0.3197	294	0.3018	222	0.2037	54	0.3333	168	0.1974	76	0.1	20
C20_30863388	20	30863388	-1.018	-1.082	0.1243	-0.6825	-1.772	6.01e-05	0.001345	0.923	0.2545	0.01222	C	G	intergenic	FRG1BP;DEFB115	dist=443546;dist=394276	.	20	30863388	6.01e-05	0.001345	0.923	0.2545	0.01222	C	G	0.4036	944	0.3473	334	0.4344	610	0.3944	502	0.3398	206	0.4324	296	0.4189	222	0.3889	54	0.4286	168	0.4474	76	0.45	20
rs3916631	20	53603526	0.9285	1.093	1.912	0.3017	1.076	1.45e-05	0.0001206	0.04239	0.5681	0.06803	G	C	intergenic	ZNF217;LOC105372672	dist=9687;dist=4828	.	20	53603526	1.45e-05	0.0001206	0.04239	0.5681	0.06803	G	C	0.1752	942	0.2395	334	0.1398	608	0.188	500	0.2524	206	0.1429	294	0.1486	222	0.1667	54	0.1429	168	0.1579	76	0.3	20
rs6128575	20	59463753	-0.9017	-0.9585	-0.7185	-0.8204	-1.641	9.4e-06	0.0005735	0.4468	0.1654	0.0007301	G	A	intergenic	EDN3;PHACTR3	dist=137761;dist=113756	.	20	59463753	9.4e-06	0.0005735	0.4468	0.1654	0.0007301	G	A	0.2277	940	0.1566	332	0.2664	608	0.208	500	0.1359	206	0.2585	294	0.15	220	0.1346	52	0.1548	168	0.1842	76	0.15	20
rs75304843	20	59464793	-0.8922	-0.9566	-0.3247	-0.7778	-1.636	1.04e-05	0.0006655	0.6853	0.1786	0.0006876	T	C	intergenic	EDN3;PHACTR3	dist=138801;dist=112716	.	20	59464793	1.04e-05	0.0006655	0.6853	0.1786	0.0006876	T	C	0.2304	942	0.1587	334	0.2697	608	0.206	500	0.1359	206	0.2551	294	0.1486	222	0.1296	54	0.1548	168	0.2237	76	0.2	20
rs6070808	20	59465782	-0.8912	-0.9689	-0.7185	-0.6554	-1.641	1.54e-05	0.0006939	0.4468	0.2704	0.0007301	A	G	intergenic	EDN3;PHACTR3	dist=139790;dist=111727	.	20	59465782	1.54e-05	0.0006939	0.4468	0.2704	0.0007301	A	G	0.2203	944	0.1527	334	0.2574	610	0.2012	502	0.1311	206	0.25	296	0.1351	222	0.1296	54	0.1369	168	0.1842	76	0.15	20
rs6128935	20	60879500	0.4222	0.1769	0.06886	2.275	0.1982	0.01481	0.4183	0.9321	7.66e-05	0.6637	C	T	intergenic	MIR548AG2;LINC01718	dist=314875;dist=199564	.	20	60879500	0.01481	0.4183	0.9321	7.66e-05	0.6637	C	T	0.2373	944	0.2844	334	0.2115	610	0.249	502	0.2718	206	0.2331	296	0.2117	222	0.3704	54	0.1607	168	0.1711	76	0.15	20
rs2016776	20	60880322	0.4803	0.2836	-0.3196	2.301	0.1122	0.007181	0.2076	0.7393	6.2e-05	0.8084	G	A	intergenic	MIR548AG2;LINC01718	dist=315697;dist=198742	.	20	60880322	0.007181	0.2076	0.7393	6.2e-05	0.8084	G	A	0.2219	942	0.2725	334	0.1941	608	0.232	500	0.267	206	0.2075	294	0.2297	222	0.3889	54	0.1786	168	0.1447	76	0.1	20
C21_13824276	21	13824276	1	1.167	2.718	0.4726	1.273	7.84e-05	0.001309	0.01562	0.4392	0.05711	G	A	intergenic	LOC110091777;CYP4F29P	dist=57739;dist=18857	.	21	13824276	7.84e-05	0.001309	0.01562	0.4392	0.05711	G	A	0.09216	944	0.1347	334	0.06885	610	0.09163	502	0.1311	206	0.06419	296	0.07658	222	0.09259	54	0.07143	168	0.1184	76	0.25	20
C21_13824301	21	13824301	0.9976	0.9084	2.137	0.8952	2.157	7.67e-05	0.006973	0.03422	0.1423	0.009277	G	A	intergenic	LOC110091777;CYP4F29P	dist=57764;dist=18832	.	21	13824301	7.67e-05	0.006973	0.03422	0.1423	0.009277	G	A	0.09448	942	0.1386	332	0.07049	610	0.104	500	0.1373	204	0.08108	296	0.07207	222	0.1111	54	0.05952	168	0.1053	76	0.2	20
rs17285057	21	38407430	1.38	1.666	-0.4015	1.361	0.9872	6.14e-05	0.0009001	0.7862	0.04451	0.444	C	G	intronic	ERG	.	.	21	38407430	6.14e-05	0.0009001	0.7862	0.04451	0.444	C	G	0.04731	930	0.08485	330	0.02667	600	0.05081	492	0.09406	202	0.02069	290	0.05405	222	0.1111	54	0.03571	168	0.05263	76	0.05	20
rs112853186	21	38409252	1.39	1.655	-0.4015	1.388	1.093	5.6e-05	0.0009576	0.7862	0.04311	0.3961	A	G	intronic	ERG	.	.	21	38409252	5.6e-05	0.0009576	0.7862	0.04311	0.3961	A	G	0.04681	940	0.08434	332	0.02632	608	0.05	500	0.09223	206	0.02041	294	0.05455	220	0.1154	52	0.03571	168	0.05263	76	0.05	20
C22_10925703	22	10925703	-0.9008	-0.9581	-1.711	-0.773	-1.075	7.86e-05	0.001396	0.1679	0.1402	0.06873	T	G	intergenic	NONE;FRG1FP	dist=NONE;dist=14894	.	22	10925703	7.86e-05	0.001396	0.1679	0.1402	0.06873	T	G	0.1773	942	0.1198	334	0.2089	608	0.178	500	0.1214	206	0.2177	294	0.1802	222	0.1296	54	0.1964	168	0.1447	76	0.05	20
C22_12196992	22	12196992	-0.919	-0.9057	-0.05812	-0.8318	-1.934	9.34e-05	0.002624	0.9534	0.1502	0.01065	T	C	intergenic	LOC102723769;NONE	dist=240458;dist=NONE	.	22	12196992	9.34e-05	0.002624	0.9534	0.1502	0.01065	T	C	0.1681	928	0.1104	326	0.1993	602	0.1721	494	0.115	200	0.2109	294	0.1697	218	0.1296	54	0.1829	164	0.1486	74	0.1	20
C22_12221737	22	12221737	-0.8591	-1.227	NA	-0.1426	-0.7881	0.0002125	7.93e-05	NA	0.813	0.2463	A	G	intergenic	LOC102723769;NONE	dist=265203;dist=NONE	.	22	12221737	0.0002125	7.93e-05	NA	0.813	0.2463	A	G	0.372	914	0.3188	320	0.4007	594	0.3545	488	0.2828	198	0.4034	290	0.3879	214	0.4	50	0.3841	164	0.3824	68	0.3333	18
C22_12290021	22	12290021	-0.8378	-1.175	-1.485	-0.08329	-0.8134	6.88e-05	3.98e-05	0.1011	0.8632	0.1762	G	A	intergenic	LOC102723769;NONE	dist=333487;dist=NONE	.	22	12290021	6.88e-05	3.98e-05	0.1011	0.8632	0.1762	G	A	0.3195	942	0.2665	334	0.3487	608	0.31	500	0.2427	206	0.3571	294	0.3108	222	0.3148	54	0.3095	168	0.3289	76	0.2	20
C22_12632661	22	12632661	-0.8318	-1.093	-0.8051	-0.4253	-0.6066	6.88e-05	0.0001002	0.4316	0.3754	0.2578	G	A	intergenic	LOC102723769;NONE	dist=676127;dist=NONE	.	22	12632661	6.88e-05	0.0001002	0.4316	0.3754	0.2578	G	A	0.2484	942	0.1886	334	0.2812	608	0.234	500	0.165	206	0.2823	294	0.2928	222	0.2593	54	0.3036	168	0.1579	76	0.1	20
C22_12632690	22	12632690	-0.8165	-1.033	0.254	-1.023	-0.348	8.56e-05	0.0001705	0.7759	0.03712	0.5228	G	A	intergenic	LOC102723769;NONE	dist=676156;dist=NONE	.	22	12632690	8.56e-05	0.0001705	0.7759	0.03712	0.5228	G	A	0.2781	942	0.2186	334	0.3109	608	0.274	500	0.2039	206	0.3231	294	0.3108	222	0.2407	54	0.3333	168	0.1579	76	0.15	20
C22_23953709	22	23953709	-0.8755	-1.137	-1.044	-0.602	-0.1793	5.76e-05	5.98e-05	0.2877	0.2557	0.7747	A	C	ncRNA_intronic	GSTTP2	.	.	22	23953709	5.76e-05	5.98e-05	0.2877	0.2557	0.7747	A	C	0.2991	916	0.2485	326	0.3271	590	0.3012	498	0.2282	206	0.3527	292	0.2304	204	0.1875	48	0.2436	156	0.3143	70	0.2222	18
rs111710499	22	23989713	0.648	0.7282	-1.312	-0.6034	0.06267	7.56e-05	0.0004633	0.1012	0.1587	0.8934	G	A	ncRNA_intronic	GSTTP2	.	.	22	23989713	7.56e-05	0.0004633	0.1012	0.1587	0.8934	A	G	0.4935	922	0.4512	328	0.463	594	0.4365	488	0.48	200	0.3785	288	0.3411	214	0.2778	54	0.3625	160	0.4342	76	0.25	20
C22_23995033	22	23995033	-0.8959	-0.9278	-1.796	-0.5336	-0.8891	8.45e-05	0.001505	0.06191	0.2782	0.2576	C	T	ncRNA_intronic	GSTTP2	.	.	22	23995033	8.45e-05	0.001505	0.06191	0.2782	0.2576	C	T	0.3408	942	0.2964	334	0.3651	608	0.356	500	0.301	206	0.3946	294	0.2432	222	0.2037	54	0.256	168	0.3684	76	0.2	20
C22_23995038	22	23995038	-0.8804	-0.9427	-1.796	-0.5336	-0.658	0.000106	0.001325	0.06191	0.2782	0.3808	G	C	ncRNA_intronic	GSTTP2	.	.	22	23995038	0.000106	0.001325	0.06191	0.2782	0.3808	G	C	0.3397	942	0.2964	334	0.3635	608	0.356	500	0.301	206	0.3946	294	0.2432	222	0.2037	54	0.256	168	0.3684	76	0.2	20
rs390683	22	23999237	-0.8433	-1.126	-0.9477	-0.3281	-0.4435	7.54e-05	6.87e-05	0.2973	0.5255	0.4239	A	C	ncRNA_intronic	GSTTP2	.	.	22	23999237	7.54e-05	6.87e-05	0.2973	0.5255	0.4239	A	C	0.2362	944	0.1856	334	0.2639	610	0.247	502	0.1699	206	0.3007	296	0.1667	222	0.1481	54	0.1726	168	0.2632	76	0.15	20
C22_23999249	22	23999249	-0.9458	-1.246	-1.529	-0.4201	-0.3396	1.02e-05	1.15e-05	0.1071	0.4161	0.552	G	T	ncRNA_intronic	GSTTP2	.	.	22	23999249	1.02e-05	1.15e-05	0.1071	0.4161	0.552	G	T	0.25	944	0.1916	334	0.282	610	0.255	502	0.1699	206	0.3142	296	0.1757	222	0.1481	54	0.1845	168	0.3026	76	0.15	20
C22_23999254	22	23999254	-0.8997	-1.246	-1.529	-0.3416	-0.1845	2.32e-05	1.15e-05	0.1071	0.492	0.7505	T	G	ncRNA_intronic	GSTTP2	.	.	22	23999254	2.32e-05	1.15e-05	0.1071	0.492	0.7505	T	G	0.2542	944	0.1976	334	0.2852	610	0.255	502	0.1699	206	0.3142	296	0.1892	222	0.1667	54	0.1964	168	0.3026	76	0.15	20
rs150944434	22	23999282	-0.879	-0.984	-1.378	-0.7988	-0.4976	4.72e-05	0.0004129	0.1458	0.1623	0.3723	T	C	ncRNA_intronic	GSTTP2	.	.	22	23999282	4.72e-05	0.0004129	0.1458	0.1623	0.3723	T	C	0.2442	942	0.1946	334	0.2714	608	0.254	500	0.1893	206	0.2993	294	0.1577	222	0.1111	54	0.1726	168	0.2895	76	0.15	20
C22_24002890	22	24002890	-0.9803	-1.181	-2.203	-0.7563	-0.06657	5.12e-05	0.0003526	0.02748	0.1323	0.9356	A	G	ncRNA_intronic	GSTTP2	.	.	22	24002890	5.12e-05	0.0003526	0.02748	0.1323	0.9356	A	G	0.3721	938	0.3323	334	0.394	604	0.3956	498	0.3447	206	0.4315	292	0.2864	220	0.2407	54	0.3012	166	0.3421	76	0.15	20
CX_2197848	X	2197848	1.695	2.022	1.369	1.38	NA	5.82e-05	0.003236	0.2569	0.1241	NA	A	G	intergenic	ASMT;DHRSX	dist=554767;dist=21666	.	X	2197848	5.82e-05	0.003236	0.2569	0.1241	NA	A	G	0.04601	739	0.08889	270	0.02132	469	0.04113	389	0.07879	165	0.01339	224	0.03977	176	0.06977	43	0.03008	133	0.08333	60	0.1333	15
rs6616171	X	100654343	0.4272	1.026	0.1419	-0.5012	-0.04897	0.004842	2.07e-05	0.8077	0.1606	0.9216	T	G	intronic	SRPX2	.	.	X	100654343	0.004842	2.07e-05	0.8077	0.1606	0.9216	G	T	0.2343	653	0.3093	236	0.1918	417	0.2006	339	0.3611	144	0.08205	195	0.3182	154	0.2353	34	0.3417	120	0.451	51	0.4286	14
rs2354497	X	134917194	0.4654	0.7733	-0.1563	-0.04086	0.5915	0.001542	7.39e-05	0.8026	0.9174	0.326	T	A	intergenic	MOSPD1;LINC02243	dist=1937;dist=32355	.	X	134917194	0.001542	7.39e-05	0.8026	0.9174	0.326	T	A	0.3013	614	0.4072	221	0.2417	393	0.3677	310	0.4851	134	0.2557	176	0.2532	158	0.2647	34	0.25	124	0.3036	56	0.2667	15
rs1006861	X	142216687	0.7116	0.7876	NA	0.5364	0.002512	7e-05	0.001803	NA	0.1498	0.9958	G	T	intergenic	MAGEC2;SPANXN4	dist=11397;dist=809241	.	X	142216687	7e-05	0.001803	NA	0.1498	0.9958	T	G	0.148	662	0.2381	252	0.09268	410	0.1525	354	0.2384	151	0.08867	203	0.1447	152	0.2368	38	0.114	114	0.1509	53	0.4375	16
rs5908279	X	142344447	0.7481	0.899	NA	0.7932	0.5943	7.74e-05	0.002118	NA	0.04155	0.2367	C	T	intergenic	MAGEC2;SPANXN4	dist=139157;dist=681481	.	X	142344447	7.74e-05	0.002118	NA	0.04155	0.2367	T	C	0.1381	659	0.2282	241	0.08612	418	0.1217	337	0.2071	140	0.06091	197	0.1065	169	0.2093	43	0.07143	126	0.32	50	0.4286	14
[truncated: 19 more columns]
